# Supplementary material for: Inflammatory response in hematopoietic stem and progenitor cells triggered by activating SHP2 mutations evokes blood defects
Source: eLife journal article supplement (doi:10.7554/elife.73040), 2022-04-20
Supplement: supp [file elife-73040-supp-v1.zip]

Archive with 10 entries (10 files):
- elife_poa_e73040_Figure_1_figure_supplement_1.pdf
- elife_poa_e73040_Figure_2_figure_supplement_1.pdf
- elife_poa_e73040_Figure_3_figure_supplement_1.pdf
- elife_poa_e73040_Figure_4_figure_supplement_1.pdf
- elife_poa_e73040_Supplementary_file_1.xlsx
- elife_poa_e73040_Supplementary_file_2.xlsx
- elife_poa_e73040_Supplementary_file_3.xlsx
- elife_poa_e73040_Supplementary_file_4.xlsx
- elife_poa_e73040_Figure_1_source_data_1.pdf
- elife_poa_e73040_Transparent_Reporting_File.pdf
