# Supplementary material for: Inflammatory response in hematopoietic stem and progenitor cells triggered by activating SHP2 mutations evokes blood defects
Source: eLife journal article supplement (doi:10.7554/elife.73040), 2022-04-20

**A**

hSHP2 MTSRRWFHPNITGVEAENLLLTRGVDSFLARPSKSNPGDFTLSVRRNGAVTHIKIQNTG DYDLYGGEK 70  
zShp2a MTSRRWFHPNITGVEAENLLLTRGVDSFLARPSKSNPGDFTLSVRRNGAVTHIKIQNTG DYDLYGGEK 70

hSHP2 FATLAELVQYYMEHHGQLKEKNGDVIELKYPLNCADPTSERWFHGHLSGKEAEKLLTEKGKNGSFLVRES 140  
zShp2a FATLAELVQYYMEHHGQLKEKNGDVIELKYPLNCADPTSERWFHGHLSGKEAEKLLTEKGKNGSFLVRES 140

hSHP2 QSHPGDFVLSVRTGDDKGESNDGKSKVTHVMIRCO ELKYDVGGGERFDSLTDLVEHYKKNPMVETLGTV 209  
zShp2a QSHPGDFVLSVRTGDDKTDTS DGKPKVTHVMIRCO HDLKYDVGGGERFDSLTDLVEHYKKNPMVETLGTV 210

hSHP2 LQLKQPLNTRINAAEIESRVRELSKLAETTDKVKQGFWEFEFETLQQQCECKLLYSRKEGQRPENKNKNRY 279  
zShp2a LQLKQPLNTRINAAEIESRVRELSKLAETTDKVKQGFWEFEFETLQQQCECKLLYSRKEGQRPENKNKNRY 280

hSHP2 KNILPFDHTRVVLHDGDPNEFPVSDYINANIIMPEFETKCNNSKPKKSYIATQGCLQNTVND FWRMV FQEN 349  
zShp2a KNILPFDHTRVVLTDGDPNEQGSYINANLIMPDNKAKSNNSKLRKSYIATQGCLQNTISDFWRMV FQEN 350

hSHP2 SRVIVMTTKEVERGKSKCVKYWPD EYALKEYGVMRVRNVKE SAAHDYTLRELKLSKVGQGN TERTVWQYH 419  
zShp2a SRVIVMTTKEVERGKSKCVKYWPDVSALKEYGAMVRVRNVKE TMAHDYTLRELKLSKVGQGN TERTVWQYH 420

hSHP2 FRTWPDHGVESDPGGVLDLFLEEVHHKQESIMDAGPVV VHC SAGIGRTGTFTVIDILIDI IREKGVDCDID 489  
zShp2a FRAWPDHGVESDPGGVLDLFLEEVKIKQEGITGAGPIV VHC SAGIGRTGTFTVIDILIDI IREKGVDCDID 490

hSHP2 VPKTIQMVRSQRSQSMVQTEAQYRFIYMAVQHYIETLQRRIEEEQKSKRKCH EYTNIKYSLADQTS GDQSP 559  
zShp2a VPKTIQMVRSQRSQSMVQTEAQYRFIYMAVQHYIETLQRRIEEEQKSKIKCH EYTNIKYSLADLSG GDQSP 560

hSHP2 LPPCTPTTPCAEMRED SARVYENVGLMQQKSHR 593  
zShp2a LPPCTPTPTCADMRDDSSRVYENVGLMQQKSHR 594

**B**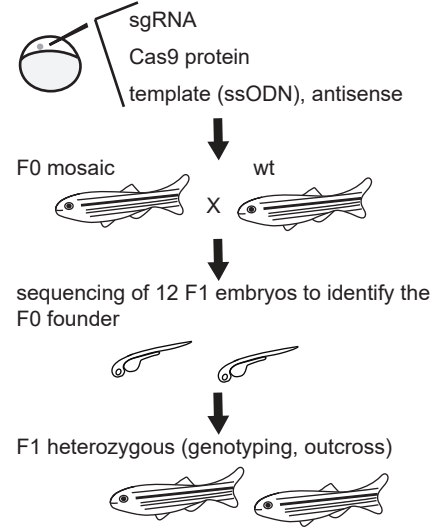**C**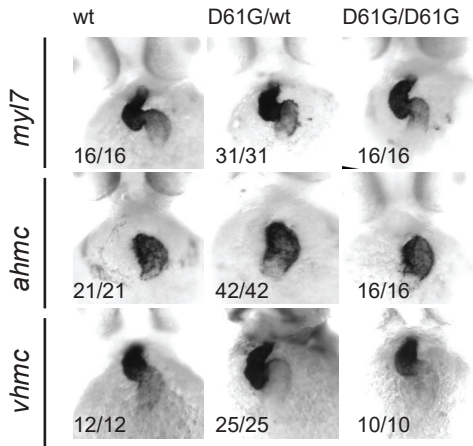**D**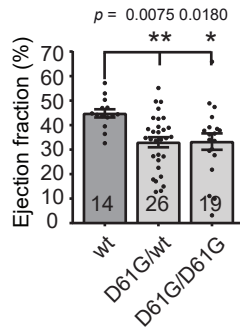**E**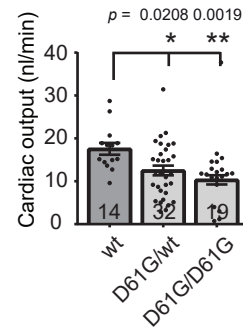

Supplement: supp [file elife-73040-supp-v1.zip › elife_poa_e73040_Figure_1_figure_supplement_1.pdf]
