# Supplementary material for: Inflammatory response in hematopoietic stem and progenitor cells triggered by activating SHP2 mutations evokes blood defects
Source: eLife journal article supplement (doi:10.7554/elife.73040), 2022-04-20

**Figure 1-source data 1**

Uncropped and unedited blots for the associated panel B in Figure 1. The red boxed indicate the cropped regions.

Total Shp2

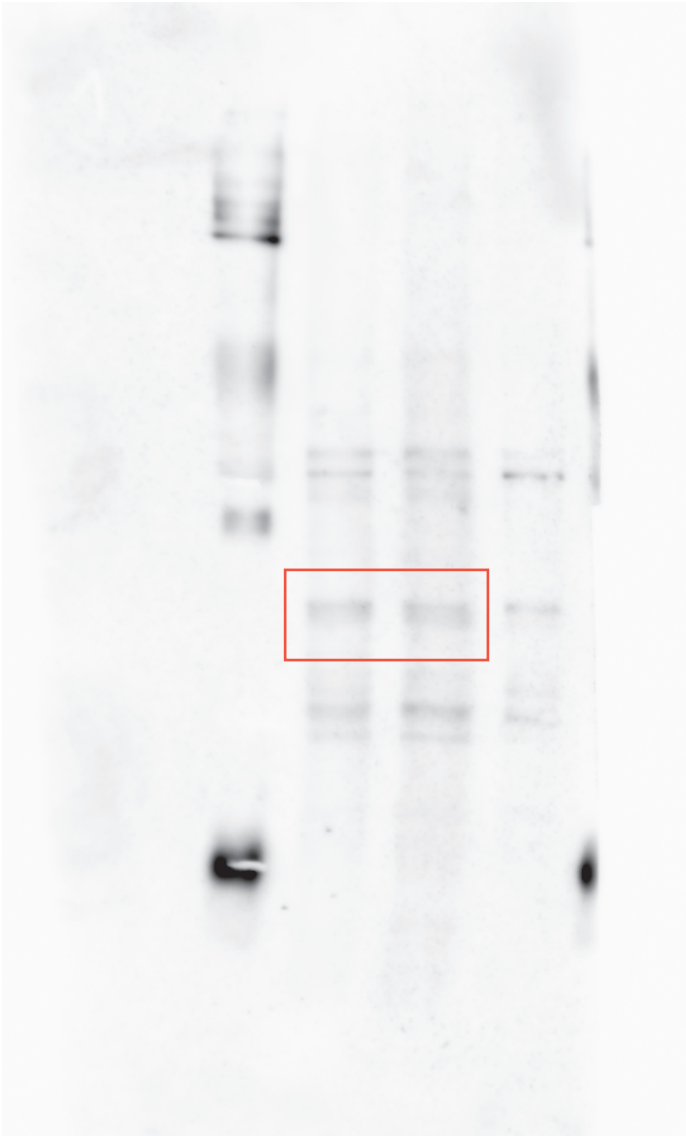

tubulin

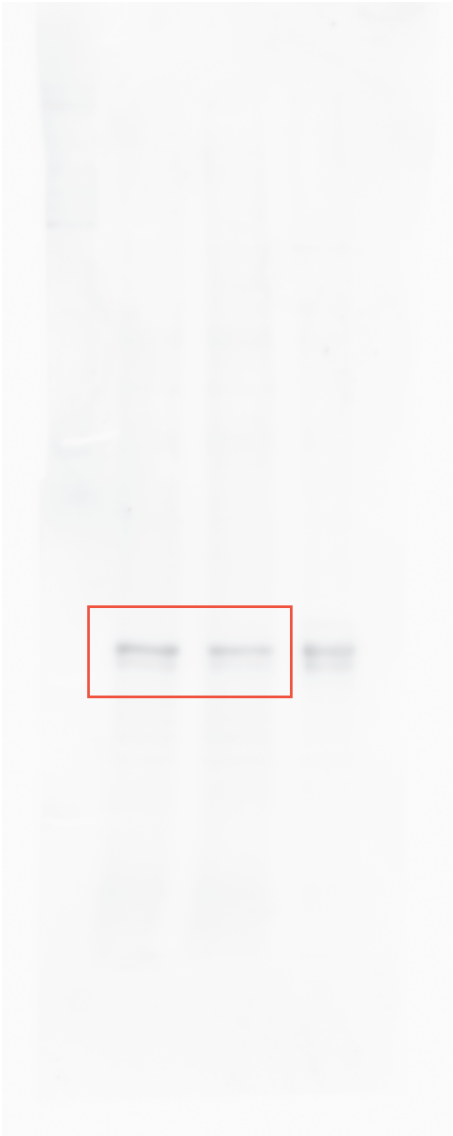

Supplement: supp [file elife-73040-supp-v1.zip › elife_poa_e73040_Figure_1_source_data_1.pdf]
