# Supplementary material for: Inflammatory response in hematopoietic stem and progenitor cells triggered by activating SHP2 mutations evokes blood defects
Source: eLife journal article supplement (doi:10.7554/elife.73040), 2022-04-20
Supplement: supp [file elife-73040-supp-v1.zip › elife_poa_e73040_Supplementary_file_2.xlsx]

## Sheet: Feuil2
Supplementary File 2. Characteristics of JMML PTPN11 mutated patients and healty subjects submitted in RNAseq
Transcripts : PTPN11(NM_002834.3), ASXL1(NM_015338.5)
JMML Patients	JMML_153-04	JMML_131-07	JMML_166-15	JMML_178-20	JMML_190-24
Gender	M	M	M	M	M
Age at diagnosis (years)	0.4	3	4	0.3	4
Platelets (109/L) at diagnosis	112	64	40	122	62
WBC (109/L) at diagnosis	37	13	16	51	35
Monocytes (109/L) at diagnosis	7.7	1.2	1.5	6.9	6.6
HbF elevated for age	No	Yes	Yes	No	Yes
LIN28B overexpression	No	Yes	Yes	Yes	Yes
Pulmonary involvement	No	No	No	No	Yes
HSCT	No	Yes	Yes	Yes	Yes
Blast crisis	No	No	No	No	No
Relapse post HSCT	No	No	No	No	No
Death	No	No	No	No	No
Variant of PTPN11	p.Ala72Thr	p.Gly503Val	p.Glu76Gln	p.Asp61Tyr	p.Glu76Lys
VAF of initiating mutation	0.45	0.42	0.42	0.44	0.46
Additional mutations			PTPN11: p.Thr468Met		ASXL1: p.Gly646Trpfs*12
VAF of initiating mutation			0.421671		0.32
Sorted fractions submitted to RNA sequencing	HSC, CMP, GMP, MEP	CMP, GMP, MEP	HSC, MPP, CMP, GMP, MEP	MPP, CMP, GMP, MEP	CMP, GMP, MEP
Healthy subjects	BM_04	BM_05	BM_06	BM_09	BM_23	BM_24	BM_27
Gender	M	F	F	M	F	F	F
Age (years)	2.2	2.7	9.4	6.8	8.5	5	7.2
Sorted fractions submitted to RNA sequencing	HSC, CMP, GMP, MEP	HSC, CMP, GMP, MEP	HSC, CMP, GMP, MEP	GMP, MEP	HSC	HSC	MPP
