# Supplementary material for: Inflammatory response in hematopoietic stem and progenitor cells triggered by activating SHP2 mutations evokes blood defects
Source: eLife journal article supplement (doi:10.7554/elife.73040), 2022-04-20
Supplement: supp [file elife-73040-supp-v1.zip › elife_poa_e73040_Supplementary_file_4.xlsx]

## Sheet: Title
Supplementary Table 4. GSEA analysis of differentially expressed genes in JMML patient derived HSPCs

## Sheet: GSEA
ID	Gene_set_type	setSize	enrichmentScore	NES	pvalue	p.adjust	rank	leading_edge	core_enrichment
HALLMARK_TNFA_SIGNALING_VIA_NFKB	Hallmark	199	0.744099	3.41199	5.59332e-49	1.72604e-44	2166	tags=58%, list=10%, signal=53%	TNF/PTX3/MSC/TNFSF9/CXCL1/CXCL3/INHBA/LIF/CCL5/CXCL10/DUSP5/HBEGF/CSF1/PHLDA1/CCL4/PHLDA2/DUSP2/TNFRSF9/MARCKS/G0S2/KYNU/ICAM1/F3/IER3/TRIB1/TUBB2A/BCL3/CD83/CLCF1/GPR183/IL23A/RELB/PLAU/IL6/CEBPD/SDC4/SGK1/CXCL2/CCL2/GFPT2/ATF3/SERPINE1/LDLR/ZC3H12A/DUSP4/EGR2/BCL2A1/CD69/NINJ1/NR4A3/GADD45B/SLC2A3/BCL6/IER5/SERPINB2/CCND1/NFKBIA/MAP3K8/PLAUR/TNFAIP3/NFKBIE/JUNB/CDKN1A/PTGS2/CXCL11/CSF2/KLF2/RIP…
MCLACHLAN_DENTAL_CARIES_UP	C2_curated	249	0.633531	2.98299	7.78487e-34	1.20117e-29	2121	tags=39%, list=10%, signal=36%	RPS4Y1/EIF1AY/CCL3/IRF8/ADM/KDM5D/CXCL8/CXCL1/INHBA/CCL5/HCAR3/DDX3Y/IL11/IL1RN/IL10RA/JCHAIN/G0S2/KYNU/ICAM1/TREM1/SPP1/IER3/CYP1A1/TRIB1/MMP9/BCL3/SERPINA1/IRF4/PLAU/IL6/CEBPD/IGKC/FCN1/S100A9/LTB/CCL2/SFRP4/BCL2A1/MT2A/S100A8/HCK/SLC2A3/RGS2/RAB31/TIMP1/CLEC7A/SERPINB2/TYROBP/PLAUR/TNFAIP3/CD48/APOE/PTGS2/CLEC2B/IGFLR1/FCER1G/SAT1/CYBB/C5AR1/CD79A/APOC1/FCGR2A/CHI3L1/CCR1/IFI30/FPR1/ABCA1/CXCL…
GSE2706_UNSTIM_VS_2H_R848_DC_DN	C7_immunologic	183	0.663929	3.00792	6.63626e-30	6.82628e-26	2560	tags=50%, list=12%, signal=44%	IRF8/CXCL1/CXCL3/INHBA/WT1/CCL5/CXCL10/DUSP5/CCL4/DDX3Y/IL10RA/ICAM1/PMAIP1/TUBB2A/STX11/BCL3/CLCF1/IL6/LILRA5/LTA/SDC4/CXCL2/ZC3H12A/TRAT1/LRRC32/MIR22HG/NINJ1/APOBEC3A/NR4A3/GADD45B/ISG15/SLC2A3/NFKBIA/MAP3K8/PLAUR/TNFAIP3/DNAAF1/PTGS2/IRAK2/PIM3/TTN/GBP1/KCNJ2/GCH1/CHST7/FXYD6/MARCKSL1/MAP2K3/NFKBID/C17orf58/TNFAIP2/SLC7A5/CSRNP1/BIRC3/MIR3142HG/GPR132/GADD45A/EDN1/MFSD2A/NFKBIB/IFIT3/SOCS3/DC…
GSE9988_LPS_VS_CTRL_TREATED_MONOCYTE_UP	C7_immunologic	192	0.653252	2.97393	4.23928e-29	3.0549e-25	2862	tags=46%, list=13%, signal=41%	TNF/ADM/PTX3/CXCL8/CXCL1/CXCL3/INHBA/DUSP5/GPR84/CCL4/PHLDA2/DUSP2/MARCKS/G0S2/ADORA2A-AS1/ICAM1/IER3/CD83/CLCF1/IL23A/IL6/AQP9/CXCL2/ZC3H12A/CCR7/BCL2A1/OSR2/LINC01465/GADD45B/RND1/NFKBIA/MAP3K8/PLAUR/TNFAIP3/DNAAF1/CDKN1A/PTGS2/PIM3/RIPK2/GBP1/KCNJ2/GBP2/GCH1/FOSL1/PELI1/AREG/ADTRP/CSRNP1/BIRC3/MIR3142HG/NLRP3/ATP2B1-AS1/ELL2/GADD45A/ETS2/EDN1/MFSD2A/PTP4A1/RGCC/SOCS3/HES1/ID2/PTGER4/PLK3/RAP2C…
MODULE_84	C4_computational	536	0.486596	2.47934	4.94978e-29	3.0549e-25	3337	tags=37%, list=15%, signal=32%	TNF/CCL3/IRF8/ADM/KDM5D/CXCL8/PRF1/CXCL1/LIF/GSTM1/CCL5/CCL4/DDX3Y/TCF7/IL1RN/IL10RA/JCHAIN/KYNU/BAIAP3/ICAM1/SPP1/IER3/ITGB7/MMP9/STX11/SERPINA1/COL6A2/NGFR/COL1A2/IL1RAP/IL2RB/PLAU/IL6/NKG7/IGKC/FCN1/S100A9/WNT10B/LTB/AQP9/CCL2/GFPT2/SERPINE1/MPO/BCL2A1/CD69/LRRC32/CD6/NINJ1/S100A8/IL2RG/HCK/ISG15/RAB31/COL6A1/BCL6/TYROBP/HBA2/CCND1/TNFAIP3/CYP1B1/ANXA1/LCK/CD48/APOE/JUNB/CDKN1A/PLIN2/S100P/CLE…
GSE9988_LOW_LPS_VS_CTRL_TREATED_MONOCYTE_UP	C7_immunologic	193	0.650392	2.96482	6.00562e-29	3.08879e-25	2862	tags=48%, list=13%, signal=42%	TNF/ADM/PTX3/CXCL8/CXCL1/CXCL3/INHBA/DUSP5/GPR84/CCL4/PHLDA2/DUSP2/IL2RA/G0S2/ADORA2A-AS1/ICAM1/F3/IER3/CD83/CLCF1/IL23A/HAS1/IL6/SDC4/AQP9/CXCL2/ZC3H12A/CCR7/BCL2A1/LINC01465/NR4A3/GADD45B/RND1/NFKBIA/MAP3K8/PLAUR/TNFAIP3/DNAAF1/PTGS2/PIM3/RIPK2/GBP1/GBP2/GCH1/FOSL1/EGR3/PELI1/AREG/CASP5/ADTRP/CSRNP1/BIRC3/MIR3142HG/NLRP3/ATP2B1-AS1/ELL2/GADD45A/ETS2/EDN1/MFSD2A/PTP4A1/RGCC/SOCS3/HES1/ID2/NR4A1/…
GSE9988_LPS_VS_VEHICLE_TREATED_MONOCYTE_UP	C7_immunologic	191	0.651103	2.96875	2.91475e-28	1.28495e-24	2862	tags=46%, list=13%, signal=40%	TNF/ADM/PTX3/CXCL8/NIPAL4/CXCL1/CXCL3/INHBA/DUSP5/GPR84/CCL4/PHLDA2/DUSP2/IL2RA/G0S2/ADORA2A-AS1/ICAM1/PMAIP1/IER3/CD83/IL23A/IL6/AQP9/CXCL2/ZC3H12A/CCR7/BCL2A1/LINC01465/GADD45B/RND1/CHAC1/NFKBIA/MAP3K8/PLAUR/TNFAIP3/DNAAF1/PTGS2/PIM3/RIPK2/GCH1/FOSL1/PELI1/AREG/CASP5/ADTRP/NFKBID/TNFAIP2/SLC7A5/CSRNP1/BIRC3/MIR3142HG/NLRP3/ATP2B1-AS1/GADD45A/ETS2/EDN1/MFSD2A/PTP4A1/SOCS3/PIM2/ID2/PLK3/TNFAIP6/A…
GSE2706_UNSTIM_VS_2H_LPS_AND_R848_DC_DN	C7_immunologic	185	0.650872	2.95642	5.06143e-28	1.95238e-24	2560	tags=48%, list=12%, signal=43%	IRF8/TNFRSF4/TPPP/CXCL1/CXCL3/CXCL10/DUSP5/HCAR3/DDX3Y/DUSP2/IL10RA/ICAM1/OASL/TUBB2A/STX11/GPR183/RELB/IL6/CREB5/LTA/CXCL2/ATF3/LDLR/ZC3H12A/CCR7/LRRC32/APOBEC3A/NR4A3/ISG15/NFKBIA/MAP3K8/PLAUR/TNFAIP3/DNAAF1/JUNB/CDKN1A/PTGS2/HES4/CXCL11/CILP2/PIM3/TTN/ST7-AS1/RIPK2/GBP1/KCNJ2/CHST7/PELI1/SLAMF1/FXYD6/MARCKSL1/CXCL9/C17orf58/TNFAIP2/CSRNP1/BIRC3/MIR3142HG/GPR132/GADD45A/IRF1/EDN1/MFSD2A/IFIT3/S…
MODULE_45	C4_computational	570	0.464445	2.37841	1.05497e-26	3.61725e-23	3563	tags=32%, list=16%, signal=27%	TNF/ADM/KDM5D/CXCL8/PRF1/LIF/CCL5/ARC/HCAR3/DDX3Y/TCF7/IL1RN/IL10RA/JCHAIN/KYNU/FBN2/IER3/ITGB7/OASL/MMP9/STX11/SERPINA1/IL1RAP/IL2RB/NKG7/FCN1/S100A9/WNT10B/LTB/AQP9/GFPT2/SERPINE1/ARL4C/CD3E/BCL2A1/DOK2/CD6/NINJ1/S100A8/IL2RG/HCK/SLC2A3/RGS2/RAB31/BCL6/HAP1/TNFAIP3/CYP1B1/ANXA1/CHST1/LCK/CD48/LY86/JUNB/S100P/CLEC2B/STAT1/FGR/ALAS2/GBP1/FCER1G/TRIB2/GBP2/CYBB/GCH1/CD79A/ADGRE5/FCGR2A/CCR1/ASIC2/…
BLANCO_MELO_BRONCHIAL_EPITHELIAL_CELLS_INFLUENZA_A_DEL_NS1_INFECTION_UP	C2_curated	610	0.450898	2.31771	3.11636e-26	9.61677e-23	3265	tags=32%, list=15%, signal=28%	DUSP8/ADM/TNFSF9/CXCL3/LIF/CXCL10/DUSP5/ARC/B3GNT7/HCAR3/HBEGF/CSF1/DUSP2/CCNA1/TNFRSF9/IL10RA/SNAI1/BAIAP3/SLC15A3/ICAM1/TRIB1/OASL/STX11/BCL3/CD83/CLCF1/IL23A/ARSI/HCAR2/DLX2/HS3ST1/FZD8/HSPA2/SGK1/CXCL2/ADAMTS15/ZC3H12A/C2orf66/KLHDC7B/BCL2A1/IFITM1/SOCS1/APOBEC3A/OSR2/ACHE/LGALS3BP/RND1/CHAC1/HAP1/KBTBD8/NFKBIA/PLAUR/ODF3B/METRNL/JUNB/HES4/MSX2/IRAK2/CRISPLD2/STAT1/KLF2/SOWAHB/ST7-AS1/SEMA7A/…
GSE9988_LOW_LPS_VS_VEHICLE_TREATED_MONOCYTE_UP	C7_immunologic	190	0.638312	2.90746	4.6359e-26	1.30054e-22	2862	tags=45%, list=13%, signal=40%	TNF/ADM/PTX3/CXCL8/TNFSF9/CXCL1/CXCL3/INHBA/DUSP5/GPR84/CCL4/PHLDA2/DUSP2/IL2RA/G0S2/ADORA2A-AS1/ICAM1/PMAIP1/F3/IER3/CD83/IL23A/SDC4/AQP9/CXCL2/ZC3H12A/CCR7/BCL2A1/LINC01465/GADD45B/RND1/NFKBIA/MAP3K8/PLAUR/TNFAIP3/DNAAF1/PTGS2/PIM3/RIPK2/GCH1/FOSL1/PELI1/AREG/GPRC5A/CASP5/ADTRP/NFKBID/TNFAIP2/SLC7A5/CSRNP1/BIRC3/MIR3142HG/NLRP3/ATP2B1-AS1/GADD45A/ETS2/EDN1/MFSD2A/PTP4A1/SOCS3/PIM2/ID2/PLK3/TNFA…
GSE45365_NK_CELL_VS_CD11B_DC_DN	C7_immunologic	197	0.624809	2.86618	7.40808e-26	1.90505e-22	3779	tags=49%, list=17%, signal=41%	PTX3/CXCL1/LIF/DUSP5/HBEGF/PHLDA1/CCL4/IL1RN/SLC15A3/ICAM1/TREM1/IER3/MMP9/STX11/RAB20/HAS1/IL6/S100A9/SDC4/CXCL2/SERPINE1/S1PR3/S100A8/SLC2A3/RAB31/RND1/TIMP1/CLEC7A/IER5/NFKBIA/TNFAIP3/TUBB6/JUNB/MAFB/JDP2/GCH1/FOSL1/CHI3L1/GPRC5A/MARCKSL1/SPRY1/CORO1A/CH25H/FPR2/NFKBID/TNFAIP2/CLEC4D/NGF/SLC7A5/CSRNP1/BIRC3/CYTH4/ZFP36/ETS2/EFHD2/CEBPB/MPEG1/EIF5A/C15orf48/RNF19B/PGLYRP1/SLC3A2/ITGB2/NFIL3/MYO…
GSE2706_UNSTIM_VS_2H_LPS_DC_DN	C7_immunologic	183	0.634213	2.8733	2.65734e-25	6.30791e-22	1985	tags=43%, list=9%, signal=40%	IRF8/TNFRSF4/CXCL1/CXCL3/INHBA/CXCL10/DUSP5/HCAR3/DUSP2/IL10RA/ICAM1/OASL/TUBB2A/STX11/GPR183/IL23A/RELB/IL6/CREB5/LTA/CXCL2/ATF3/LDLR/ZC3H12A/LRRC32/KCNH2/NINJ1/APOBEC3A/NR4A3/GADD45B/ISG15/NFKBIA/MAP3K8/PLAUR/TNFAIP3/DNAAF1/CDKN1A/HES4/CXCL11/IRAK2/PIM3/TTN/RIPK2/GBP1/KCNJ2/PELI1/FXYD6/MARCKSL1/MAP2K3/C17orf58/TNFAIP2/CSRNP1/BIRC3/MIR3142HG/ELL2/GPR132/GADD45A/SLC2A6/IRF1/EDN1/MFSD2A/NFKBIB/IFI…
GSE19401_NAIVE_VS_IMMUNIZED_MOUSE_PLN_FOLLICULAR_DC_UP	C7_immunologic	199	0.623737	2.86009	3.64723e-25	8.03927e-22	2050	tags=35%, list=9%, signal=32%	RPS4Y1/TNF/CCL3/CXCL8/MSC/CXCL1/LGALS1/DUSP5/THBS1/CCL4/PHLDA2/PDGFA/DUSP2/G0S2/ICAM1/MXRA7/CYP1A1/OASL/TUBB2A/BCL3/CD83/IL1RAP/SH3BP5/S100A9/CXCL2/ATF3/SERPINE1/DUSP4/S100A12/CD69/MIR22HG/S100A8/SLC2A3/RAB31/SERPINB2/JUNB/CDKN1A/UPP1/PPIF/LMNA/RHOB/PRDM1/HMOX1/MARCKSL1/CD99/EMP3/MAP2K3/GNA15/ICOSLG/EZR/SLC7A5/ZFP36/RUNX3/TEX30/CEMIP/IFIT3/ITM2A/RNF19B/TRAF1/CLIC1/HMGA1/GEM/NFKB1/DDIT4/RGS1/BTG2/…
MODULE_64	C4_computational	514	0.465993	2.35989	8.86135e-24	1.82302e-20	3601	tags=38%, list=17%, signal=32%	ROR2/CCL3/ADM/CXCL8/CD96/CXCL1/INHBA/GPR3/LIF/CXCL10/DUSP5/HCAR3/HBEGF/KCNN1/CSF1/CCL4/IL11/DUSP2/SH2D1A/IL10RA/HAS2/ROR1/ICAM1/F3/ITGB7/CD83/GPR183/NGFR/IL1RAP/IL2RB/IL6/NKG7/SSTR2/LTA/S100A9/LTB/AQP9/CXCL2/CCL2/LDLR/CD3E/ADRA2B/SFRP4/GHRHR/CD69/XCL1/IFITM1/LRRC32/CD6/KCNH2/NTRK1/IL2RG/LGALS3BP/RGS2/TYROBP/EPHA4/MAP3K8/PLAUR/EFNA5/ANXA1/CNR2/LCK/APOE/CDKN1A/CXCL11/CD5/CLEC2B/STAT1/ITGAX/GPR65/FG…
GO_INFLAMMATORY_RESPONSE	C5_GO	727	0.419223	2.17542	1.49253e-23	2.87863e-20	3080	tags=28%, list=14%, signal=25%	TNF/CCL3/ADM/PTX3/TNFRSF4/CXCL8/CD96/CXCL1/CXCL3/CCL5/CXCL10/THBS1/CSF1/NFATC4/BCL6B/CCL4/IL2RA/IL1RN/CXCR3/IL1RL1/ICAM1/TREM1/SPP1/F3/MMP9/SERPINA1/IL23A/RELB/IL1RAP/IL6/NCR3/LILRA5/LTA/S100A9/CXCL2/PROK2/CCL2/IL17RE/SERPINE1/LDLR/CD28/ZC3H12A/CCR7/S100A12/IL5RA/S1PR3/XCL1/CD6/S100A8/HCK/GPER1/F12/TNFSF11/TIMP1/BCL6/CLEC7A/TYROBP/DUSP10/NFKBIA/TNFAIP3/IL34/HAVCR2/ANXA1/CNR2/CHST1/GPR31/METRNL/LY…
GAO_LARGE_INTESTINE_24W_C11_PANETH_LIKE_CELL	C8_cellSignature	313	0.530731	2.55778	2.71613e-23	4.93041e-20	1697	tags=30%, list=8%, signal=28%	TNF/CCL3/IRF8/CXCL8/CXCL3/INHBA/CXCL10/HCAR3/CCL4/DUSP2/IL1RN/IL4I1/KYNU/SLC15A3/ICAM1/MMP9/STX11/CD83/IL23A/CD300E/PLAU/HCAR2/HCST/SGK1/CXCL2/ARL4C/ADGRG5/KLHDC7B/BCL2A1/DOK2/NINJ1/APOBEC3A/NR4A3/HCK/CLEC7A/TYROBP/PLAUR/TNFAIP3/HAVCR2/NFKBIE/ODF3B/CD48/METRNL/LY86/PLIN2/PTGS2/CLEC2B/GBP5/ITGAX/GPR65/PPIF/RIPK2/HPGDS/MAFB/FCER1G/CYBB/C5AR1/FCGR2A/CHI3L1/CCR1/PELI1/CD68/IFI30/HMOX1/FPR1/ABCA1/CXCL…
GSE9988_ANTI_TREM1_VS_CTRL_TREATED_MONOCYTES_UP	C7_immunologic	192	0.610994	2.78155	5.69031e-23	9.7554e-20	2204	tags=36%, list=10%, signal=33%	TNF/ADM/RRAD/CXCL8/INHBA/NRIP3/DUSP5/HBEGF/CSF1/PHLDA1/HIC1/DUSP2/PMAIP1/SPP1/F3/TRIB1/RAB20/SH3BP5/SGK1/CXCL2/ATF3/RASD1/DUSP4/EGR2/S1PR3/MIR22HG/MMP19/GADD45B/SLC2A3/CHAC1/BAG3/KBTBD8/PLAUR/HAVCR2/CRTAM/CDKN1A/UPP1/PTGS2/HES4/SESN2/SPRY2/FOSL1/EGR3/GPRC5A/NEU1/LINC01010/CSRNP1/THBD/ATP2B1-AS1/ELL2/ETS2/CTSV/FERMT2/EDN1/CEBPB/PTP4A1/RGCC/B3GNT5/NR4A1/HOMER1/SLC3A2/GEM/DDIT4/RGS1/DTL/ZNF674-AS1/M…
GSE41176_UNSTIM_VS_ANTI_IGM_STIM_BCELL_1H_UP	C7_immunologic	194	0.607431	2.77187	9.79574e-23	1.59098e-19	2098	tags=35%, list=10%, signal=32%	ADM/PTX3/CXCL8/CXCL1/CXCL3/INHBA/DUSP5/HCAR3/CCL4/DUSP2/TNFRSF9/FEZ1/MARCKS/G0S2/TFPI2/ICAM1/TREM1/UPB1/IER3/TRIB1/BCL3/IL23A/HAS1/IL6/HSPA2/CHRM4/CXCL2/HOXA1/ZC3H12A/NINJ1/BHLHE41/HCK/GADD45B/IER5/NFKBIA/PLAUR/NFKBIE/UPP1/PTGS2/PPIF/KCNJ2/PRR16/SLAMF1/BCL2L14/FPR2/SLC16A6/EBI3/ETS2/SLC2A6/CEBPB/NFKBIB/CEMIP/SOCS3/TNFRSF1B/PIM2/SYN1/CHST2/TRAF1/TNFAIP6/CA14/IL15RA/FFAR2/UPK1A/NFKB1/SIGLEC9/DNAJB5…
MODULE_46	C4_computational	387	0.497657	2.45556	1.06081e-22	1.63678e-19	2858	tags=36%, list=13%, signal=32%	CCL3/IRF8/CXCL8/PRF1/EGR4/CXCL1/LIF/CXCL10/HBEGF/EPS8/CSF1/CCL4/PDGFA/IL11/SH2D1A/TPSAB1/HLA-G/F3/OASL/CD83/GPR183/IL1RAP/IL2RB/IL6/PDCD1/FCN1/LTA/LTB/AQP9/CXCL2/CCL2/MPO/PRG2/CD69/XCL1/IFITM1/CD6/IL2RG/LGALS3BP/ISG15/TNFSF11/TIMP1/BCL6/TYROBP/NFKBIA/CNR2/CD48/LY86/APOE/CXCL11/CD5/CLEC2B/STAT1/GPR65/FGR/GATA3/GBP1/FCER1G/GBP2/CYBB/SERPINF1/C5AR1/CD79A/FCGR2A/CCR1/SLAMF1/CHIT1/AREG/CD3D/SFN/CXCL9/…
AIZARANI_LIVER_C18_NK_NKT_CELLS_5	C8_cellSignature	118	0.695212	2.94772	1.16153e-22	1.70683e-19	3082	tags=53%, list=14%, signal=45%	CXCL8/HBEGF/PMAIP1/IER3/CD83/GPR183/FCN1/S100A9/SGK1/BCL2A1/S100A8/APOBEC3A/HCK/GADD45B/RGS2/RAB31/CLEC7A/IER5/TYROBP/BAG3/PLAUR/ANXA1/KLF2/ITGAX/FGR/MAFB/FCER1G/SAT1/CYBB/C5AR1/FCGR2A/CCR1/AREG/FPR1/RNASE6/CCL3L3/C3AR1/TNFAIP2/CSF1R/LILRB3/HSPA6/ATP2B1-AS1/FCGR3A/CEBPB/LST1/COTL1/MPEG1/TNFRSF1B/NCF2/VIM/S100A11/MNDA/ATP2B1/SAMHD1/LILRB1/TLR2/NCF1/HSP90AA1/HSPA1B/PTPRE/DNAJB1/SLC7A7
GSE9988_ANTI_TREM1_AND_LPS_VS_CTRL_TREATED_MONOCYTES_UP	C7_immunologic	189	0.613748	2.78905	1.3087e-22	1.8357e-19	2951	tags=41%, list=14%, signal=36%	TNF/ADM/CXCL8/INHBA/DUSP5/HBEGF/CSF1/PHLDA2/DUSP2/ADORA2A-AS1/PMAIP1/IER3/CLCF1/IL23A/IL6/CREB5/SGK1/CXCL2/ZC3H12A/CCR7/MIR22HG/GADD45B/SLC2A3/CHAC1/MAP3K8/PLAUR/CDKN1A/PTGS2/HES4/SESN2/PIM3/IL36RN/RIPK2/SPRY2/BHLHE40/FOSL1/GPRC5A/KLF6/ADTRP/NEU1/CSRNP1/NLRP3/ATP2B1-AS1/GADD45A/ETS2/FERMT2/EDN1/PTP4A1/RGCC/SOCS3/HES1/ID2/NR4A1/PTGER4/PLK3/HOMER1/SLC3A2/ARL5B/GEM/TMEM88/DDIT4/B3GNT2/RGS1/DTL/PIM1/…
ZHANG_RESPONSE_TO_IKK_INHIBITOR_AND_TNF_UP	C2_curated	217	0.589568	2.74623	2.19107e-22	2.93975e-19	2065	tags=35%, list=10%, signal=32%	PTX3/CXCL8/CXCL1/CXCL3/INHBA/LIF/CCL5/CXCL10/HCAR3/HBEGF/TNFRSF9/IL1RN/IL4I1/G0S2/KYNU/ICAM1/OASL/TUBB2A/BCL3/CD83/IL23A/RELB/CITED4/PLAU/SDC4/SGK1/CXCL2/ATF3/ZC3H12A/FAM83B/BCL2A1/NINJ1/NFKBIA/PLAUR/TNFAIP3/NFKBIE/CDKN1A/IRAK2/SEMA7A/RIPK2/GCH1/PELI1/MARCKSL1/RAB11FIP1/KLF6/MAP2K3/LAMA2/TNFAIP2/NFKB2/BIRC3/TNFRSF10D/GPR132/SLC2A6/IRF1/EDN1/CEBPB/IFIT3/SOCS3/B3GNT5/ABTB2/C15orf48/RNF19B/TRAF1/CLD…
GSE14769_UNSTIM_VS_80MIN_LPS_BMDM_DN	C7_immunologic	196	0.604296	2.76784	2.50886e-22	3.22587e-19	3850	tags=47%, list=18%, signal=39%	DUSP8/TNFSF9/CXCL1/CCL5/DUSP5/HBEGF/GPR84/PHLDA1/CCL4/IL1RN/IL10RA/SLC15A3/ICAM1/STX11/RAB20/CD83/IL23A/ATF3/SERPINE1/SLFN12L/ZC3H12A/DUSP4/EGR2/BCL2A1/CD69/GADD45B/ISG15/BCL6/IER5/MAP3K8/PLAUR/FILIP1L/NFKBIE/PIM3/RIPK2/GBP2/KLF6/IER2/CH25H/NFKBID/TNFAIP2/CSRNP1/BIRC3/IRGQ/EBI3/PDGFB/IRF1/CEBPB/ID2/PTGER4/ABTB2/RNF19B/TRAF1/ARL5B/REL/NFIL3/RGS1/BTG2/TIPARP/HERPUD1/MAFF/FOSL2/OSGIN2/SDE2/OSM/BCL2L…
GSE9988_ANTI_TREM1_AND_LPS_VS_VEHICLE_TREATED_MONOCYTES_UP	C7_immunologic	188	0.604149	2.75406	5.25276e-22	6.48379e-19	2951	tags=40%, list=14%, signal=35%	TNF/ADM/RRAD/CXCL8/NIPAL4/CXCL1/CXCL3/INHBA/DUSP5/CSF1/PHLDA2/DUSP2/CCNA1/ADORA2A-AS1/PMAIP1/SPP1/F3/IER3/IL23A/CREB5/AQP9/CXCL2/ZC3H12A/CCR7/S1PR3/MMP19/CHAC1/MAP3K8/PLAUR/UPP1/PTGS2/SESN2/PIM3/IL36RN/SPRY2/FOSL1/GPRC5A/ADTRP/NEU1/SLC7A5/CSRNP1/MIR3142HG/NLRP3/ATP2B1-AS1/GADD45A/ETS2/FERMT2/MFSD2A/PTP4A1/DOLK/RGCC/ID2/PLK3/HOMER1/SLC3A2/ARL5B/GEM/DDIT4/DTL/DNAJB4/ZNF674-AS1/OSGIN2/ATP2B1/IL10/MA…
JAATINEN_HEMATOPOIETIC_STEM_CELL_DN	C2_curated	230	0.566087	2.64275	1.04238e-21	1.20067e-18	2618	tags=41%, list=12%, signal=36%	HBG1/CCL3/PRF1/CCL5/THBS1/CCL4/IL1RN/IL10RA/TESC/MMP9/TUBB2A/STX11/SERPINA1/IL21R/IL2RB/NKG7/LILRA5/CEBPD/FCN1/S100A9/PYHIN1/SGK1/CD28/ARL4C/TRAT1/CCR7/S100A12/DOK2/XCL1/ZAP70/MIR22HG/S100A8/HCK/TENM1/SLC2A3/CLEC7A/MYL4/SERPINB2/TYROBP/EPHA4/TNFAIP3/CYP1B1/LEF1/LCK/UPP1/CDKN2D/CD5/CRISPLD2/KLF2/GPR65/FGR/OLIG1/ALAS2/FCER1G/PRKCA/SGSH/CYBB/C5AR1/FCGR2A/CHI3L1/CCR1/CD3D/DOCK9/IFI30/FPR1/HBA1/ADTRP/…
GO_CYTOKINE_MEDIATED_SIGNALING_PATHWAY	C5_GO	756	0.405107	2.10944	1.05052e-21	1.20067e-18	3171	tags=27%, list=15%, signal=24%	TNF/CCL3/IRF8/TNFRSF4/TNFRSF18/CXCL8/TNFSF9/CXCL1/STX1A/CXCL3/LIF/CCL5/CXCL10/CSF1/CCL4/IL11/IL2RA/TNFRSF9/IL1RN/IL10RA/TNFRSF12A/CXCR3/IL1RL1/HLA-G/ICAM1/FOXC1/CD70/F3/OASL/MMP9/IL21R/CLCF1/IL23A/COL1A2/IL1RAP/IL2RB/IRF4/IL6/CEBPD/LTA/IL12RB1/LTB/CXCL2/CCL2/IL17RE/CCR7/IL5RA/TRAF4/PLP2/XCL1/IFITM1/SOCS1/MT2A/TWIST1/IL2RG/HCK/ISG15/TNFSF11/TIMP1/BCL6/SERPINB2/CCND1/NFKBIA/MAP3K8/TNFAIP3/PRTN3/IL3…
NAGASHIMA_NRG1_SIGNALING_UP	C2_curated	170	0.621916	2.77285	1.1409e-21	1.2353e-18	2065	tags=41%, list=10%, signal=37%	DUSP8/ADM/EGR4/LIF/DUSP5/ARC/HBEGF/PHLDA2/DUSP2/TNFRSF12A/PMAIP1/IER3/TRIB1/TUBB2A/SOWAHC/CLCF1/DLX2/SGK1/ATF3/LDLR/DUSP4/SOCS1/MIR22HG/NEDD9/NR4A3/GADD45B/RGS2/CYP24A1/IER5/DUSP10/MAP3K8/PLAUR/TUBB6/JUNB/KLF2/GAL/VEGFA/BHLHE40/FOSL1/EGR3/AREG/SFN/KLF6/IER2/MAP2K3/RARA/EZR/ZFP36/CDC42EP3/GADD45A/ETS2/FERMT2/EDN1/CEBPB/HES1/NR4A1/HOMER1/PFKFB3/REL/GEM/NFIL3/NAB2/LYPD3/DDIT3/LRRC15/AKIRIN1/TIPARP/Z…
MODULE_75	C4_computational	390	0.489218	2.41221	1.16088e-21	1.2353e-18	2791	tags=36%, list=13%, signal=32%	CCL3/IRF8/ADM/CXCL8/PRF1/EGR4/CXCL1/LIF/CXCL10/HBEGF/EPS8/CSF1/CCL4/PDGFA/IL11/SH2D1A/TPSAB1/HLA-G/F3/OASL/CD83/GPR183/IL1RAP/IL2RB/IL6/PDCD1/FCN1/LTA/LTB/AQP9/CXCL2/CCL2/MPO/PRG2/CD69/XCL1/IFITM1/CD6/IL2RG/LGALS3BP/ISG15/TNFSF11/TIMP1/BCL6/TYROBP/NFKBIA/MAP3K8/CNR2/LCK/CD48/LY86/APOE/CDKN1A/CXCL11/CD5/CLEC2B/STAT1/GPR65/FGR/GLYAT/GATA3/GBP1/FCER1G/GBP2/CYBB/SERPINF1/C5AR1/CD79A/FCGR2A/CCR1/SLAMF…
REACTOME_CYTOKINE_SIGNALING_IN_IMMUNE_SYSTEM	C2_curated	861	0.390241	2.06015	1.23038e-21	1.26561e-18	2797	tags=24%, list=13%, signal=22%	TNF/CCL3/DUSP8/IRF8/TNFRSF4/TNFRSF18/PDE3B/CXCL8/TNFSF9/CXCL1/STX1A/LIF/PTPN14/CCL5/CXCL10/DUSP5/HBEGF/CSF1/CCL4/PDGFA/IL11/DUSP2/IL2RA/TNFRSF9/IL1RN/IL10RA/TNFRSF12A/IL1RL1/HLA-G/ICAM1/CD70/OASL/MMP9/IL21R/CLCF1/IL23A/RELB/COL1A2/IL1RAP/IL2RB/IRF4/IL6/CEBPD/LTA/IL12RB1/LTB/CXCL2/CCL2/PTPN3/IL17RE/DUSP4/S100A12/IL5RA/IFITM1/SOCS1/MT2A/TWIST1/IL2RG/HCK/ISG15/TNFSF11/TIMP1/BCL6/SERPINB2/CCND1/DUSP1…
GSE9509_LPS_VS_LPS_AND_IL10_STIM_IL10_KO_MACROPHAGE_20MIN_UP	C7_immunologic	182	-0.624474	-2.75683	1.91783e-21	1.90911e-18	3112	tags=44%, list=14%, signal=38%	COL5A1/TAL1/FAM117A/SLC8A3/IDNK/STX17/ITGA2B/ARMCX1/GLB1L/MTG2/DAPK1/ARHGAP22/SESN3/RXRB/RNF150/NOTCH4/CFH/CALN1/ELOVL7/CFAP46/ADAMTSL4/PPFIBP1/FAM210B/PEAR1/EHD2/ZNF692/ATXN7L1/IGSF9/ARSD/HTR1F/RABGAP1/TESPA1/FN3K/ACOX2/ERG/KAZALD1/STARD9/EPHB4/CTDSPL/STON2/C21orf62-AS1/GIPC2/DNAH10/CCDC87/ZNF862/ATP7B/PPP1R9A/TCTEX1D1/GLS2/ZNF521/PROS1/MAPRE3/ACACB/ZNF501/CNKSR1/FITM2/PLOD2/TSPAN6/ROBO4/ADGRG6/…
GSE32986_CURDLAN_HIGHDOSE_VS_GMCSF_AND_CURDLAN_HIGHDOSE_STIM_DC_DN	C7_immunologic	197	0.590002	2.7065	2.00739e-21	1.93581e-18	2914	tags=40%, list=13%, signal=35%	TNF/RRAD/TNFSF9/CXCL1/CXCL3/CXCL10/DUSP5/GPR84/CCL4/DUSP2/IL10RA/IL4I1/ICAM1/STX11/RAB20/BCL3/CD83/SPAG6/RELB/SDC4/CNN3/SLFN12L/ZC3H12A/CCR7/CD69/NR4A3/HCK/GADD45B/ISG15/NFKBIA/TNFAIP3/FILIP1L/NFKBIE/JUNB/PTGS2/IRAK2/EGR3/PRDM1/MARCKSL1/FPR2/NFKBID/TNFAIP2/ICOSLG/NFKB2/CSRNP1/BIRC3/ZFP36/NLRP3/GPR132/ETS2/SLC2A6/IRF1/SOCS3/TNFRSF1B/NR4A1/PTGER4/RNF19B/TRAF1/REL/GEM/NFKB1/CCL22/SLC31A2/SPNS3/PIM1/…
OSWALD_HEMATOPOIETIC_STEM_CELL_IN_COLLAGEN_GEL_UP	C2_curated	216	0.574493	2.67806	2.98791e-21	2.79406e-18	2321	tags=32%, list=11%, signal=29%	TNF/CCL3/PTX3/CXCL8/CXCL1/CXCL3/CXCL10/HCAR3/CCL4/DDX3Y/DUSP2/IL1RN/ICAM1/TREM1/F3/IER3/TRIB1/CD83/GPR183/FLNC/IL2RB/IL6/SGK1/CXCL2/CCL2/ATF3/ZC3H12A/ARL4C/BCL2A1/PEG10/GADD45B/RGS2/IER5/SERPINB2/NFKBIA/TNFAIP3/CYP1B1/LEF1/JUNB/CDKN1A/PTGS2/KLF2/SPRY2/KCNJ2/EGR3/PLK2/AREG/RAB11FIP1/KLF6/IER2/C3AR1/BIRC3/ZFP36/CDC42EP3/ETS2/FERMT2/CCR9/TGM4/PTGER4/TNFAIP6/ROM1/ADNP2/RGS1/BTG2/TIPARP/MAFF/ZFP36L1/P…
ALTEMEIER_RESPONSE_TO_LPS_WITH_MECHANICAL_VENTILATION	C2_curated	123	0.672105	2.87055	3.12112e-21	2.83279e-18	2071	tags=49%, list=10%, signal=44%	CCL3/ADM/TNFSF9/CXCL3/CXCL10/THBS1/HCAR3/GPR84/IL1RN/IL4I1/TFPI2/SLC15A3/F3/RAB20/BCL3/RELB/IL6/CEBPD/CXCL2/CCL2/ATF3/SERPINE1/GADD45G/SLFN12L/BCL2A1/ISG15/TIMP1/NFKBIA/MAP3K8/PLAUR/TNFAIP3/JUNB/UPP1/CSF2/STAT1/GPR65/FCER1G/GBP2/CYBB/GCH1/FCGR2A/CCR1/MARCKSL1/CH25H/FPR2/TNFAIP2/CLEC4D/EBI3/LST1/SOCS3/CCL4L2/FCGR1A/PFKFB3/GEM/IRGM/IFIT2/NFIL3/PLA2G7/MAFF/ITGAM
GALINDO_IMMUNE_RESPONSE_TO_ENTEROTOXIN	C2_curated	80	0.752373	2.98238	3.69458e-21	3.25746e-18	2988	tags=64%, list=14%, signal=55%	TNF/CCL3/TNFSF9/CXCL3/CCL5/PHLDA1/BCL6B/PDGFA/DUSP2/IL1RN/SPP1/IER3/BCL3/CD83/SLFN12L/GADD45B/NFKBIA/PLAUR/TNFAIP3/PCDH7/JUNB/PTGS2/VEGFA/BHLHE40/FOSL1/SCD/RHOB/MARCKSL1/TNFAIP2/NFKB2/GADD45A/ETS2/UBC/CEBPB/SOCS3/CCL4L2/TRAF1/IL18RAP/NFKB1/NAB2/LILRB4/PIM1/HERPUD1/BCL2L11/CSF3/ACOD1/ACTG1/NOCT/GAPDH/ODC1/PTPRE
GSE14769_UNSTIM_VS_40MIN_LPS_BMDM_DN	C7_immunologic	198	0.584399	2.67991	9.5983e-21	8.22761e-18	3230	tags=44%, list=15%, signal=38%	TNF/TNFSF9/CXCL3/CXCL10/DUSP5/GPR84/PHLDA1/CCL4/DUSP2/IL10RA/HLA-G/IER3/RAB20/SOWAHC/RELB/SDC4/SGK1/CXCL2/CCL2/ATF3/SLFN12L/ZC3H12A/DUSP4/EGR2/CD69/GADD45B/BCL6/IER5/NFKBIA/MAP3K8/TNFAIP3/FILIP1L/NFKBIE/JUNB/PTGS2/FAM83D/VEGFA/PELI1/PLK2/MARCKSL1/KLF6/IER2/CDKN2B/ADTRP/NFKBID/CSRNP1/BIRC3/ZFP36/UBC/SLC2A6/IRF1/TEX30/CEBPB/NFKBIB/SOCS3/ID2/CDH11/PTGER4/RNF19B/TRAF1/ARL5B/REL/RGS1/BTG2/PIM1/TIPARP/…
GSE9988_ANTI_TREM1_VS_LOW_LPS_MONOCYTE_DN	C7_immunologic	195	0.591597	2.70949	1.38381e-20	1.15414e-17	2862	tags=42%, list=13%, signal=37%	TNF/PTX3/CXCL8/CXCL1/CXCL3/HCAR3/GPR84/CCL4/DUSP2/TNFRSF9/MARCKS/G0S2/ADORA2A-AS1/ICAM1/PMAIP1/IER3/OASL/STX11/CD83/CLCF1/IL23A/IL6/SDC4/AQP9/CXCL2/LDLR/ZC3H12A/BCL2A1/LINC01465/HCK/RND1/IER5/NFKBIA/MAP3K8/TNFAIP3/PTGS2/IRAK2/PIM3/RIPK2/GBP1/KCNJ2/GCH1/PELI1/CASP5/TNFAIP2/BIRC3/MIR3142HG/NLRP3/GPR132/EBI3/GADD45A/SLC2A6/C1orf122/SOCS3/TLR7/PIM2/ID2/LINC00528/PLK3/RAP2C/PFKFB3/RNF19B/TRAF1/TNFAIP6…
GSE9988_ANTI_TREM1_VS_ANTI_TREM1_AND_LPS_MONOCYTE_DN	C7_immunologic	190	0.595265	2.71138	2.58626e-20	2.10025e-17	1663	tags=36%, list=8%, signal=33%	TNF/PTX3/CXCL8/CXCL3/HCAR3/GPR84/CCL4/DUSP2/IL2RA/TNFRSF9/G0S2/ADORA2A-AS1/ICAM1/PMAIP1/F3/IER3/CD83/CLCF1/IL23A/IL6/SDC4/AQP9/CXCL2/ZC3H12A/CCR7/BCL2A1/NINJ1/LINC01465/SERPINB2/NFKBIA/MAP3K8/PLAUR/TNFAIP3/PTGS2/IRAK2/PIM3/CSF2/RIPK2/GBP1/KCNJ2/RDH10/GCH1/PELI1/KLF6/TNFAIP2/CSRNP1/BIRC3/ZFP36/MIR3142HG/NLRP3/ATP2B1-AS1/GPR132/GADD45A/ETS2/SLC2A6/MFSD2A/PTP4A1/SOCS3/NTRK2/ID2/LINC00528/PLK3/RAP2C/…
GSE14769_UNSTIM_VS_60MIN_LPS_BMDM_DN	C7_immunologic	199	0.584713	2.68115	3.41385e-20	2.70123e-17	3097	tags=39%, list=14%, signal=34%	TNFSF9/CXCL1/CCL5/DUSP5/GPR84/PHLDA1/CCL4/DUSP2/IL10RA/HLA-G/ICAM1/F3/IER3/STX11/RAB20/SOWAHC/CD83/RELB/SGK1/ATF3/SLFN12L/ZC3H12A/DUSP4/EGR2/BCL2A1/CD69/GADD45B/IER5/MAP3K8/PLAUR/NFKBIE/PTGS2/RIPK2/SPRY2/PLK2/MARCKSL1/KLF6/IER2/CDKN2B/NFKBID/TNFAIP2/CSRNP1/BIRC3/IRGQ/IRF1/CEBPB/NFKBIB/FURIN/ID2/RNF19B/REL/GEM/VIM/BTG2/PIM1/TIPARP/DNAJB4/HERPUD1/FOSL2/ZFP36L1/MEX3C/HLA-B/SDE2/MAPKAPK2/OSM/BCL2L11/…
FAN_EMBRYONIC_CTX_BRAIN_MYELOID	C8_cellSignature	131	0.65059	2.79331	4.72437e-20	3.64473e-17	3388	tags=48%, list=16%, signal=41%	LGALS1/RETN/SERPINA1/CD300E/S100A10/LILRA5/FCN1/HCST/S100A9/ATF3/GPBAR1/BCL2A1/DOK2/MT2A/S100A8/APOBEC3A/HCK/ISG15/TIMP1/CLEC7A/IER5/NFKBIA/PLAUR/ANXA1/CD48/PTGS2/CLEC2B/KLF2/ITGAX/FGR/MAFB/C5AR1/ADGRE5/IFI30/EMP3/LY6E/TNFAIP2/LILRB3/LSP1/CSTA/IRF1/EFHD2/CEBPB/LST1/PLEKHO1/IQGAP1/COTL1/SOCS3/ANXA2/CFD/IFITM2/VIM/S100A11/HLA-B/TMEM176B/HLA-A/CD52/TYMP/MYO1F/TKT/LYZ/NAMPT/CRIP1
DURANTE_ADULT_OLFACTORY_NEUROEPITHELIUM_DENDRITIC_CELLS	C8_cellSignature	115	0.669657	2.8319	5.06523e-20	3.81239e-17	3305	tags=54%, list=15%, signal=46%	CCL3/CXCL8/G0S2/TREM1/STX11/SERPINA1/FCN1/S100A9/CXCL2/S100A12/BCL2A1/S100A8/APOBEC3A/RGS2/TIMP1/CLEC7A/TYROBP/NFKBIA/PLAUR/TNFAIP3/CD48/PTGS2/FGR/FCER1G/CYBB/C5AR1/CD68/IFI30/FPR1/EMP3/CORO1A/SMIM25/TNFAIP2/LSP1/CCL3L1/CSTA/NLRP3/ATP2B1-AS1/FCGR3A/CEBPB/LST1/COTL1/MPEG1/TNFRSF1B/CFD/NCF2/IFITM2/SH3BGRL3/ITGB2/MNDA/ACTB/OSM/CYBA/NCF1/CD52/PTPRE/TYMP/TKT/MXD1/LCP1/SAMSN1/NAMPT
BLANCO_MELO_COVID19_BRONCHIAL_EPITHELIAL_CELLS_SARS_COV_2_INFECTION_UP	C2_curated	142	0.64039	2.78313	5.23056e-20	3.84309e-17	2291	tags=41%, list=11%, signal=37%	TNF/CXCL8/CXCL1/INHBA/LIF/HCAR3/HBEGF/SPRY4/FEZ1/G0S2/ICAM1/IER3/BCL3/RELB/IL6/S100A9/LTB/CXCL2/ZC3H12A/DUSP4/S100A12/IFITM1/NEDD9/S100A8/RND1/FAM167A/NFKBIA/MAP3K8/PLAUR/TNFAIP3/S100P/GBP5/IRAK2/MYEOV/CSF2/CSGALNACT1/C6orf223/RHOV/KRT24/PRDM1/CORO1A/TNFAIP2/NFKB2/BIRC3/PDGFB/EDN1/SOCS3/TLCD1/CHST2/C15orf48/KRT6B/C1S/EPSTI1/MAFF/ADAM8/PGLYRP4/IRF7/SAMHD1
RODRIGUES_THYROID_CARCINOMA_POORLY_DIFFERENTIATED_DN	C2_curated	751	-0.410734	-2.08634	1.23539e-19	8.8658e-17	4752	tags=37%, list=22%, signal=30%	PHC3/RBPMS/UVSSA/PLG/ZNF506/C9orf85/TRIM13/AKAP1/RAP1GAP/PEX7/PSD4/RALGAPA2/BBS1/USP34/ANKS1A/PINK1/TTC5/INTS6-AS1/NFIC/ZNF611/RNF217/ABHD14A/PID1/WDR7/LEPR/SGPP2/SIK3/CPEB3/DEXI/SMAD4/SLC39A14/MANSC1/ERCC6L2/IKZF2/DDR1/CRYL1/YIPF4/NUDT16/FBXO3/KMT5B/NEAT1/ST3GAL1/TBL1XR1/NSD1/TNFAIP8/SLC9A7/XRCC2/LONP2/ZBTB3/LRIG3/RNF146/FMNL3/TMTC1/ARID1B/ECM2/SELENBP1/MBP/TEX2/VPS13C/ATP8A1/ALDH5A1/ZNF264/VAPB…
HALLMARK_INFLAMMATORY_RESPONSE	Hallmark	200	0.573579	2.63421	3.38123e-19	2.3714e-16	2689	tags=44%, list=12%, signal=38%	ADM/CXCL8/TNFSF9/INHBA/LIF/CCL5/CXCL10/HBEGF/CSF1/TNFRSF9/IL10RA/HAS2/ICAM1/CD70/F3/GPR183/IL2RB/IL6/LTA/AQP9/PROK2/CCL2/SERPINE1/LDLR/CCR7/CD69/IFITM1/TIMP1/NFKBIA/PLAUR/PCDH7/LCK/CD48/CDKN1A/CXCL11/IRAK2/RIPK2/KCNJ2/CYBB/GCH1/C5AR1/SLAMF1/FPR1/ABCA1/CXCL9/EMP3/KLF6/LY6E/C3AR1/MSR1/GNA15/ICOSLG/AXL/NLRP3/GPR132/EBI3/IRF1/EDN1/RHOG/OPRK1/TNFRSF1B/PTGER4/AHR/CHST2/TNFAIP6/IL15RA/MET/FFAR2/IL18RAP/…
GSE26343_UNSTIM_VS_LPS_STIM_NFAT5_KO_MACROPHAGE_DN	C7_immunologic	198	0.571277	2.61974	3.8499e-19	2.64009e-16	2791	tags=38%, list=13%, signal=33%	RRAD/TNFSF9/CXCL1/HDC/CXCL10/DUSP5/GPR84/DUSP2/IL1RN/IL4I1/ICAM1/IER3/RAB20/SOWAHC/BCL3/CD83/RELB/IL6/LTA/CXCL2/PTPN3/BCL2A1/CD69/NR4A3/IL2RG/HCK/GADD45B/MYL4/MAP3K8/NFKBIE/JUNB/CDKN1A/GPR65/FGR/EPOP/GCH1/FAM83E/EGR3/PLK2/AREG/PRDM1/MARCKSL1/CXCL9/IER2/TNFAIP2/NFKB2/CSRNP1/ZFP36/NLRP3/GPR132/PDGFB/ETS2/SLC2A6/IRF1/CEBPB/SOCS3/NR4A1/PTGER4/SPIB/TRAF1/HTR7/CCL22/BTG2/PIM1/HERPUD1/MAFF/ZFP36L1/HLA-B…
GO_REGULATION_OF_CELL_ACTIVATION	C5_GO	606	0.417333	2.14211	4.20107e-19	2.81828e-16	3556	tags=30%, list=16%, signal=25%	CCL3/CD276/TNFRSF4/TNFRSF18/TNFSF9/LGALS1/INHBA/CLECL1/CCL5/THBS1/PDGFA/IL2RA/TCF7/IL1RL1/HLA-G/CD70/CD83/CLCF1/GPR183/LAX1/IL23A/IRF4/IL6/PDCD1/LILRA5/IGKC/IL12RB1/SDC4/CCL2/CD177/LDLR/CD28/ZC3H12A/CCR7/CD3E/FOXJ1/XCL1/SOCS1/ZAP70/LRRC32/CD6/NR4A3/GPER1/TNFSF11/BCL6/HLX/CLEC7A/TYROBP/DUSP10/MAP3K8/TNFAIP3/HAVCR2/ANXA1/CNR2/TBX21/CRTAM/LEF1/LCK/APOE/CDKN1A/CD5/SHH/TNFRSF13C/MILR1/RIPK2/FGR/SOX15/…
GSE19923_WT_VS_HEB_AND_E2A_KO_DP_THYMOCYTE_DN	C7_immunologic	194	0.575674	2.62695	6.0274e-19	3.95744e-16	3779	tags=40%, list=17%, signal=33%	EIF1AY/TNF/RRAD/ZNF703/TNFSF9/CSF1/PHLDA1/CCL4/IER3/RELB/IL6/SGK1/ATF3/LDLR/EGR2/BCL2A1/NEDD9/NFKBIA/MAP3K8/JUNB/SH2D2A/GPR65/SERTAD1/ARID3B/BHLHE40/GCH1/FOSL1/CCR1/PELI1/RHOB/AREG/RBM38/PRDM1/KLF6/IER2/LHX1/ZFP36/MAK/ETS2/IRF1/SOCS3/FURIN/NR4A1/PLK3/GEM/NFIL3/NAB2/BTG2/TIPARP/NPTX1/MT1E/ZFP36L1/CCR8/IL10/PGAM1/MAPK6/JMJD6/IL4/ITK/PPP1R15B/MUC1/DNAJB1/MLLT11/NABP1/SLC25A25/NAMPT/ME1/SQLE/NCAPH/BM…
GSE22886_DAY1_VS_DAY7_MONOCYTE_IN_CULTURE_UP	C7_immunologic	195	0.575931	2.63774	6.82471e-19	4.38758e-16	2425	tags=32%, list=11%, signal=29%	PTX3/TNFRSF4/INHBA/CCL5/HCAR3/HBEGF/IL2RA/TNFRSF9/MARCKS/TFPI2/ICAM1/PMAIP1/UPB1/IER3/OASL/IL23A/RELB/IL6/ZC3H12A/CCR7/DUSP4/S100A12/MIR22HG/NINJ1/GADD45B/HLX/NFKBIA/TNFAIP3/UPP1/PTGS2/PPIF/RIPK2/ARID3B/GCH1/SLAMF1/EMP3/KLF6/BASP1/GNA15/NLRP3/EBI3/ETS2/SLC2A6/FERMT2/ADGRE3/RHOG/PIM2/PLK3/RAP2C/ABTB2/PFKFB3/TRAF1/IL15RA/MET/SMAGP/MTSS1/FOSL2/ATP2B1/ZBTB43/IRF7/PDE4B/ISG20/IL10
GO_RECEPTOR_REGULATOR_ACTIVITY	C5_GO	507	0.433575	2.19036	8.2993e-19	5.15991e-16	4431	tags=38%, list=20%, signal=31%	TNF/CCL3/ADM/CXCL8/TNFSF9/CXCL1/CXCL3/INHBA/LIF/NPPC/CCL5/CXCL10/HBEGF/CSF1/CCL4/PDGFA/IL11/IL1RN/MTRNR2L1/RETN/CD70/SPP1/CLCF1/IL23A/IL6/TRH/LTA/WNT10B/LTB/CXCL2/WNT1/CCL2/SEMA6A/XCL1/PTHLH/TNFSF11/TIMP1/EFNA5/IL34/GREM2/METRNL/WNT9A/CXCL11/SHH/FGF21/CSF2/CNTF/EFEMP1/IL36RN/SEMA7A/WNT11/PATE1/GAL/NMB/EDN3/VEGFA/WNT10A/AREG/APELA/GHRL/CXCL9/ANGPTL8/LY6E/CCL3L3/VGF/BMP3/GPHA2/FGF6/NGF/BDNF/MTRNR2L…
BLANCO_MELO_COVID19_SARS_COV_2_INFECTION_CALU3_CELLS_UP	C2_curated	317	0.497733	2.39795	8.36047e-19	5.15991e-16	2783	tags=35%, list=13%, signal=31%	TNF/DUSP8/PTX3/CXCL8/CXCL3/INHBA/CCL5/CXCL10/THBS1/HBEGF/CSF1/TNFRSF9/IL10RA/G0S2/SLC15A3/ICAM1/PMAIP1/CYP1A1/OASL/STX11/NGFR/IL23A/IL6/CREB5/LTB/CXCL2/CCL2/ATF3/SERPINE1/EGR2/KLHDC7B/BCL2A1/CD69/IFITM1/MT2A/NR4A3/ISG15/RND1/CHAC1/SERPINB2/NFKBIA/MAP3K8/TNFAIP3/CYP1B1/PTGS2/CXCL11/GBP5/IRAK2/CSF2/MUC4/STAT1/SEMA7A/SPRY2/GBP1/ETV7/UBASH3A/PRDM1/CXCL9/KLF6/BCL2L14/CH25H/SLC16A6/LAMA2/ACTN2/TNFAIP2/…
WP_IL18_SIGNALING_PATHWAY	C2_curated	269	0.521398	2.48081	8.66149e-19	5.24088e-16	2627	tags=28%, list=12%, signal=25%	TNF/CCL3/PTX3/CXCL8/CXCL3/CCL5/EPS8/NFATC4/CCL4/IL2RA/ICAM1/SPP1/IER3/MMP9/CD83/COL1A2/IL6/HCAR2/LTB/SDC4/CXCL2/CCL2/ATF3/ZC3H12A/KCNH2/TNFSF11/TIMP1/NFKBIA/TNFAIP3/NFKBIE/TBX21/LCK/PTGS2/ULBP2/KLF2/PRKCA/VEGFA/HMOX1/SPON1/TNFAIP2/NFKB2/BIRC3/TICAM2/RND2/IRF1/CEBPB/ACTA1/SOCS3/PRM1/NR4A1/ARL4D/NCF2/MYH6/TRAF1/CLDN1/REL/TMSB4X/IL18RAP/NFKB1/CCL19/BTG2/PLA2G7/PTPRZ1/TIMP3/PRKCD/COL3A1/TOMM40/PIK3R1…
MANNO_MIDBRAIN_NEUROTYPES_HMGL	C8_cellSignature	564	0.418893	2.14484	8.85655e-19	5.25585e-16	2097	tags=23%, list=10%, signal=22%	HBG1/CCL3/IRF8/HBG2/CXCL8/TNFSF9/CSF1/CCL4/DUSP2/SLC15A3/ICAM1/PMAIP1/TESC/SPP1/STX11/BCL3/CD83/GPR183/OLFML3/AGR2/PLAU/CEBPD/NEU4/LTA/HCST/HS3ST1/SGK1/CXCL2/CCL2/ACY3/ATF3/ZC3H12A/EGR2/BCL2A1/DOK2/CD69/NINJ1/BHLHE41/GADD45B/C12orf75/CLEC7A/IER5/TYROBP/BAG3/HBA2/KBTBD8/NFKBIA/MAP3K8/PLAUR/TNFAIP3/HAVCR2/CD48/LY86/APOE/JUNB/CDKN1A/PTGS2/RGL1/IRAK2/LPAR5/STAT1/KLF2/GPR65/PPIF/HPGDS/MAFB/FCER1G/PRKC…
GSE46606_UNSTIM_VS_CD40L_IL2_IL5_1DAY_STIMULATED_IRF4HIGH_SORTED_BCELL_DN	C7_immunologic	199	0.570129	2.61427	1.07896e-18	6.28217e-16	2159	tags=31%, list=10%, signal=28%	TNF/ADM/RRAD/CXCL3/LIF/CCL5/CXCL10/DUSP5/PHLDA1/CCL4/DUSP2/IL10RA/SLC15A3/ICAM1/IER3/TRIB1/RAB20/SOWAHC/CLCF1/IL6/LTA/LTB/ZC3H12A/BCL2A1/NINJ1/NR4A3/IER5/SERPINB2/NFKBIA/MAP3K8/TNFAIP3/FILIP1L/CDKN1A/PTGS2/PIM3/PPIF/SERTAD1/JDP2/FAM83D/FOSL1/AREG/PRDM1/MARCKSL1/BASP1/NFKBID/TNFAIP2/CSRNP1/ZFP36/GADD45A/ETS2/NFKBIB/SOCS3/TNFRSF1B/PTGER4/TRAF1/GEM/TMEM88/RGS1/DNAJB4/MAFF/CHCHD2/ZFP36L1
KEGG_CYTOKINE_CYTOKINE_RECEPTOR_INTERACTION	C2_curated	260	0.526459	2.48594	1.23917e-18	7.08142e-16	2597	tags=33%, list=12%, signal=30%	TNF/CCL3/TNFRSF4/TNFRSF18/CXCL8/TNFSF9/CXCL1/CXCL3/INHBA/LIF/CCL5/CXCL10/CSF1/CCL4/PDGFA/IL11/IL2RA/TNFRSF9/IL10RA/TNFRSF12A/CXCR3/CD70/IL21R/CLCF1/NGFR/IL23A/IL1RAP/IL2RB/IL6/LTA/IL12RB1/LTB/CXCL2/CCL2/CCR7/IL5RA/XCL1/IL2RG/TNFSF11/CCR4/CXCL11/TNFRSF13C/CSF2/CNTF/IL20RA/VEGFA/CCR1/CXCL9/CCL3L3/TNFRSF10C/CSF1R/TNFRSF10D/CCL3L1/CD27/PDGFB/CCR9/IL25/TNFRSF1B/IL3/CCL4L2/IFNA7/TNFRSF25/EGFR/FLT3LG/IL…
GSE7218_UNSTIM_VS_ANTIGEN_STIM_THROUGH_IGG_BCELL_DN	C7_immunologic	165	0.5952	2.65683	1.30411e-18	7.31702e-16	2697	tags=42%, list=12%, signal=37%	TNF/CCL3/TNFRSF18/PRF1/IL2RA/IL1RN/ITGB7/IL21R/IL2RB/HCAR2/S100A9/ATF3/LFNG/GADD45G/SYTL3/CCR7/CD69/IFITM1/SOCS1/ZAP70/CD6/GADD45B/GPR174/HAP1/ZBTB32/HAVCR2/NFKBIE/ODF3B/TBX21/LEF1/LCK/SH2D2A/CXCL11/CSF2/KCNK5/JDP2/UBASH3A/CD3D/CORO1A/KLRG1/AXL/LSP1/MYOC/GADD45A/CST7/TIGIT/TNFRSF1B/ICOS/PTGER4/RNF19B/TRAF1/PGLYRP1/ITGB2/GEM/IL18RAP/EPSTI1/LILRB4/LPXN/MYO1G/RGS1/PIM1/PLA2G7/TMSB10/ISG20/CCR8/SGMS2…
REACTOME_SIGNALING_BY_INTERLEUKINS	C2_curated	444	0.453661	2.26754	1.42003e-18	7.82511e-16	3146	tags=30%, list=14%, signal=26%	TNF/CCL3/CXCL8/CXCL1/STX1A/LIF/PTPN14/CCL5/CXCL10/CSF1/CCL4/IL11/IL2RA/IL1RN/IL10RA/IL1RL1/ICAM1/MMP9/IL21R/CLCF1/IL23A/COL1A2/IL1RAP/IL2RB/IRF4/IL6/CEBPD/IL12RB1/CXCL2/CCL2/IL17RE/DUSP4/S100A12/IL5RA/SOCS1/TWIST1/IL2RG/HCK/TIMP1/BCL6/SERPINB2/CCND1/NFKBIA/MAP3K8/PRTN3/IL34/HAVCR2/ANXA1/LCK/JUNB/CDKN1A/PTGS2/IRAK2/CSF2/CNTF/STAT1/ITGAX/IL36RN/RIPK2/GATA3/IL20RA/VEGFA/CCR1/PELI1/S1PR1/HMOX1/FPR1/M…
GSE34392_ST2_KO_VS_WT_DAY8_LCMV_EFFECTOR_CD8_TCELL_DN	C7_immunologic	197	0.564999	2.59181	1.67046e-18	9.04361e-16	2994	tags=38%, list=14%, signal=33%	TNFSF9/DUSP5/HBEGF/CSF1/GPR84/PHLDA1/PDGFA/IL4I1/GAS7/SLC15A3/CD70/F3/STX11/RAB20/BCL3/RELB/IL2RB/PLAU/IL6/HCAR2/CXCL2/ATF3/DUSP4/ADRA2B/EGR2/BCL2A1/XCL1/NR4A3/IL2RG/GADD45B/ISG15/MCEMP1/NFKBIE/JUNB/RIPK2/FXYD2/JDP2/GCH1/RHOB/MARCKSL1/FPR2/NFKBID/NFKB2/BIRC3/NLRP3/EBI3/PDGFB/SLC2A6/EDN1/CEBPB/ID2/PLK3/TRAF1/GEM/IFIT2/MET/NRP2/NAB2/STAP1/HERPUD1/FOSL2/TAGLN2/ALAS1/ATF4/CMPK2/TLR2/VASP/C3/RASGEF1B/…
GO_REGULATION_OF_LYMPHOCYTE_ACTIVATION	C5_GO	484	0.436292	2.19289	1.72607e-18	9.18361e-16	3556	tags=29%, list=16%, signal=25%	CD276/TNFRSF4/TNFRSF18/TNFSF9/LGALS1/INHBA/CLECL1/CCL5/IL2RA/TCF7/HLA-G/CD70/CD83/CLCF1/GPR183/LAX1/IL23A/IRF4/IL6/PDCD1/IGKC/IL12RB1/SDC4/CCL2/CD28/ZC3H12A/CCR7/CD3E/FOXJ1/XCL1/SOCS1/ZAP70/LRRC32/CD6/TNFSF11/BCL6/HLX/CLEC7A/TYROBP/DUSP10/MAP3K8/TNFAIP3/HAVCR2/ANXA1/TBX21/CRTAM/LEF1/LCK/CDKN1A/CD5/SHH/TNFRSF13C/RIPK2/FGR/GAL/GATA3/EGR3/PELI1/PRDM1/ZNF683/RARA/CORO1A/NFKBID/ICOSLG/TRBC2/NRARP/AXL/…
GSE9988_ANTI_TREM1_VS_LPS_MONOCYTE_DN	C7_immunologic	195	0.572525	2.62214	1.7791e-18	9.3053e-16	2862	tags=39%, list=13%, signal=34%	TNF/PTX3/CXCL8/CXCL1/HCAR3/CCL4/DUSP2/TNFRSF9/MARCKS/G0S2/ADORA2A-AS1/ICAM1/PMAIP1/IER3/OASL/STX11/CD83/CLCF1/IL23A/IL6/SDC4/AQP9/CXCL2/LDLR/ZC3H12A/BCL2A1/OSR2/LINC01465/HCK/RND1/NFKBIA/MAP3K8/TNFAIP3/PTGS2/IRAK2/PIM3/RIPK2/GBP1/KCNJ2/GCH1/PELI1/TNFAIP2/BIRC3/MIR3142HG/NLRP3/GPR132/EBI3/GADD45A/SLC2A6/C1orf122/FSCN1/SOCS3/TLR7/LINC00528/PLK3/RAP2C/PFKFB3/RNF19B/TRAF1/TNFAIP6/IL15RA/FFAR2/NFKB1/T…
AIZARANI_LIVER_C23_KUPFFER_CELLS_3	C8_cellSignature	215	0.552362	2.57325	1.8257e-18	9.37077e-16	3310	tags=40%, list=15%, signal=34%	CXCL8/LGALS1/THBS1/GAS7/TREM1/CD300E/S100A10/CREB5/FCN1/S100A9/S100A12/BCL2A1/PLP2/S100A8/APOBEC3A/HCK/SLC2A3/RGS2/RAB31/BCL6/CLEC7A/TYROBP/NFKBIA/PLAUR/ANXA1/LY86/PTGS2/ITGAX/FGR/MAFB/JDP2/FCER1G/SAT1/CYBB/C5AR1/FCGR2A/CCR1/AREG/FPR1/SLC43A2/BASP1/SMIM25/TNFAIP2/LILRB3/CSTA/CDC42EP3/ATP2B1-AS1/RNASEK/EFHD2/LST1/RHOG/COTL1/MPEG1/TNFRSF1B/CFD/NCF2/AHR/SH3BGRL3/GLIPR2/VMP1/ITGB2/VIM/S100A11/ITGAM/M…
KIM_WT1_TARGETS_UP	C2_curated	215	0.552303	2.57298	1.85235e-18	9.37077e-16	2209	tags=35%, list=10%, signal=32%	PTX3/CXCL8/PLEKHG3/INHBA/WT1/LIF/DUSP5/ARC/THBS1/HBEGF/CSF1/PHLDA2/PDGFA/IL11/IL2RA/TNFRSF12A/FOXC1/F3/IER3/TRIB1/SOWAHC/CD83/FLNC/RELB/IL1RAP/SH3BP5/SDC4/SGK1/CCL2/GFPT2/SERPINE1/PTHLH/RRAS2/NFKBIA/PLAUR/TNFAIP3/NFKBIE/PCDH7/LEF1/JUNB/PDE10A/HPGDS/SPRY2/BHLHE40/FOSL1/AREG/SFN/IER2/MAP2K3/RARA/PDLIM4/NFKB2/FERMT2/SH2B3/NR4A1/SHB/ST3GAL5/DOK5/HMGA1/GEM/FGF5/NFKB1/B3GNT2/SOX9/CARD10/DNAJB5/TIMP3/ZY…
GSE9316_IL6_KO_VS_IFNG_KO_INVIVO_EXPANDED_CD4_TCELL_DN	C7_immunologic	192	0.568297	2.58717	2.25681e-18	1.12327e-15	2520	tags=33%, list=12%, signal=30%	TNF/TNFRSF4/CXCL3/LIF/CCL5/CXCL10/HBEGF/GPR84/CCL4/IL2RA/IL1RN/SLC15A3/ICAM1/CD70/IER3/OASL/IL12RB1/CXCL2/CCL2/ATF3/SERPINE1/GADD45G/ZC3H12A/SYTL3/BCL2A1/SOCS1/LGALS3BP/GADD45B/TIMP1/STRA6/RRAS2/NFKBIA/TNFAIP3/CDKN1A/UPP1/CXCL11/RIPK2/GBP2/PLK2/CXCL9/CH25H/TNFAIP2/EBI3/IRF1/EDN1/SOCS3/TRAF1/GLIPR2/TAP1/IL15RA/NFIL3/DDIT3/CLIC4/MAFF/GZMB/MT1E/IRF7/CHMP4B/IL10/CSF3/ZBP1/IL12RB2/MAPK6/ACOD1
CUI_DEVELOPING_HEART_C8_MACROPHAGE	C8_cellSignature	270	0.51881	2.46892	2.74526e-18	1.32748e-15	2210	tags=31%, list=10%, signal=28%	CCL3/IRF8/CXCL8/HBEGF/DUSP2/IL10RA/RETN/PMAIP1/IER3/CD83/GPR183/CEBPD/HCST/S100A9/SGK1/DOK2/NINJ1/S100A8/HCK/GADD45B/SLC2A3/RGS2/RAB31/CLEC7A/IER5/TYROBP/NFKBIA/MAP3K8/PLAUR/METRNL/LY86/JUNB/CDKN1A/ITGAX/HPGDS/MAFB/FCER1G/CYBB/C5AR1/FCGR2A/CD68/RHOB/IFI30/FPR1/KLF6/CORO1A/BASP1/RNASE6/C3AR1/MSR1/CSF1R/CYTH4/LSP1/ZFP36/CSTA/NLRP3/FCGR3A/SH2B3/EFHD2/CEBPB/LST1/RHOG/IQGAP1/COTL1/MPEG1/TNFRSF1B/B3GNT…
GSE36888_UNTREATED_VS_IL2_TREATED_STAT5_AB_KNOCKIN_TCELL_2H_UP	C7_immunologic	193	0.570088	2.59876	2.75313e-18	1.32748e-15	3546	tags=38%, list=16%, signal=32%	TNF/ADM/CXCL8/CXCL1/STX1A/CXCL3/GPR84/CCL4/PLPP1/HIC1/TNFRSF9/G0S2/KYNU/ICAM1/TREM1/SOWAHC/SERPINA1/S100A9/CXCL2/CCL2/ZC3H12A/S100A12/PLP2/MIR22HG/HCK/ASPHD2/BCL6/PLAUR/TNFAIP3/IRAK2/FCER1G/GCH1/OLIG2/FCAR/MARCKSL1/FPR2/SH3PXD2B/SLC16A6/NFKB2/LILRA1/ELL2/EBI3/LRP12/MFSD2A/DGAT2/SOCS3/NCF2/PLK3/C15orf48/TRAF1/TNFAIP6/CLIC1/MET/DDIT4/CCL19/GLIS3/UHRF1/SLC22A4/LILRB1/TLR2/C3/ALDOA/CKAP4/GAPDH/WNT5A/…
PHONG_TNF_TARGETS_UP	C2_curated	63	0.775142	2.94385	2.90556e-18	1.37942e-15	1682	tags=60%, list=8%, signal=56%	DUSP8/PTX3/CXCL8/CXCL1/CXCL3/INHBA/LIF/DUSP5/IL11/ICAM1/IER3/CD83/PLAU/IL6/CEBPD/SDC4/CXCL2/ATF3/LDLR/EGR2/IER5/DUSP10/NFKBIA/TNFAIP3/JUNB/CSF2/BHLHE40/PLK2/KLF6/IER2/TNFAIP2/NFKB2/BIRC3/ZFP36/ETS2/IRF1/REL/GEM
BLANCO_MELO_RESPIRATORY_SYNCYTIAL_VIRUS_INFECTION_A594_CELLS_UP	C2_curated	280	0.51322	2.44552	3.93675e-18	1.84067e-15	3270	tags=36%, list=15%, signal=31%	TNF/CCL3/PTX3/CXCL8/CXCL1/CXCL10/NRIP3/HCAR3/HBEGF/CSF1/CCL4/TNFRSF9/TFPI2/ICAM1/PMAIP1/F3/OASL/MMP9/STX11/IL21R/IL1RAP/PLAU/IL6/HCAR2/CREB5/SDC4/CXCL2/CCL2/GFPT2/ATF3/LDLR/ZC3H12A/TCAF2/BCL2A1/IFITM1/ACHE/RGS2/ZBTB32/PLAUR/TNFAIP3/DSEL/TMEM158/CXCL11/GBP5/IRAK2/CRISPLD2/ULBP2/STAT1/LY6K/IGFN1/GBP1/PTPRH/GBP2/STRIP2/CD68/ABCA1/CH25H/BIRC3/HSPA6/PGF/NT5E/COL13A1/IRF1/SH2B3/ADM2/IFIT3/SOCS3/TNFRSF1…
HAY_BONE_MARROW_CD34_POS_HSC	C8_cellSignature	119	-0.668222	-2.77712	6.62175e-18	3.04986e-15	3047	tags=46%, list=14%, signal=40%	SLC8A3/NKAIN2/CCDC171/SAMD13/CASC15/PROM1/ARMCX1/CD164/C9orf43/CALN1/HLF/HOXA10-AS/HOXA9/TMEM163/EHD2/KRT8/HTR1F/CDH7/FAM133A/MSRB3/UBR5-AS1/HOXA3/SULT1C4/CTSF/NPDC1/CCDC42/HOXB6/TCEAL2/DPPA4/AVP/TCTEX1D1/HOXA10/ZNF521/SLC1A6/HOXB-AS3/RASSF9/UCHL1/ARNTL2-AS1/PLOD2/ROBO4/KRT18/ADGRG6/CYYR1/HOXB3/CCDC175/EMCN/DSG2/BEX1/CHRM3/MYCT1/CRHBP/NKX2-3/PRKG2/C3orf80/IL12A-AS1
GO_LYMPHOCYTE_ACTIVATION	C5_GO	732	0.385699	2.00286	7.18115e-18	3.25887e-15	2573	tags=21%, list=12%, signal=19%	CD276/TNFRSF4/TNFRSF18/PRF1/TNFSF9/LGALS1/INHBA/CD7/CLECL1/CCL5/IL11/IL2RA/TCF7/HLA-G/ICAM1/CD70/BCL3/IL21R/CD83/CLCF1/GPR183/LAX1/IL23A/RELB/IRF4/IL6/NCR3/PDCD1/IGKC/IL12RB1/FZD8/SDC4/WNT1/CCL2/LFNG/CD28/ZC3H12A/POU1F1/CCR7/CD3E/FOXJ1/XCL1/SOCS1/ZAP70/LRRC32/CD6/NTRK1/TNFSF11/BCL6/HLX/CLEC7A/TYROBP/DUSP10/MAP3K8/TNFAIP3/HAVCR2/ANXA1/TBX21/CRTAM/LEF1/LCK/CDKN1A/CD5/SHH/TNFRSF13C/ULBP2/RIPK2/FGR/M…
JAATINEN_HEMATOPOIETIC_STEM_CELL_UP	C2_curated	304	-0.511545	-2.39703	7.88087e-18	3.52458e-15	4815	tags=45%, list=22%, signal=36%	PON2/ZNF618/TXNRD3/RBPMS/FAIM/LPIN1/SMARCA2/UNG/SHANK3/SV2A/PLA2G4A/CPT1A/BIVM/FAM216A/ME3/DEPTOR/KHDRBS3/NRIP1/PLA2G12A/WDR91/BSPRY/SLC9A7/MSH5/SGK3/SPIN4/KIT/AKR1C3/DOCK7/MAP7/CREBZF/NPR3/NAP1L3/CD109/MEGF6/FAM30A/ASPH/FGD5/PKD2/ANGPT1/STK3/HOXA5/ADAM28/ERMP1/TANC1/SPOCK3/ALG10B/PM20D2/MSI2/GLIDR/RCN1/COL5A1/PRDM11/NKAIN2/ETV6/AKT3/CCDC171/SAMD13/B4GALT6/SSBP2/ATP6V0A2/MAST4/PROM1/ARMCX1/DAPK1/…
GSE36891_POLYIC_TLR3_VS_PAM_TLR2_STIM_PERITONEAL_MACROPHAGE_UP	C7_immunologic	147	0.612405	2.67766	1.17203e-17	5.16682e-15	2425	tags=42%, list=11%, signal=38%	CXCL1/LIF/DUSP5/HBEGF/SPRY4/PHLDA1/DUSP2/PMAIP1/IER3/TRIB1/IL6/CEBPD/SDC4/SGK1/CXCL2/CCL2/ATF3/SERPINE1/DUSP4/ADRA2B/EGR2/PEG10/MT2A/LRRC32/NR4A3/RGS2/TNFAIP3/AGBL2/JUNB/PTGS2/GPR65/SPRY2/BHLHE40/PLK2/RHOB/PRDM1/SPRY1/IER2/BIRC3/ZFP36/SMARCA1/EDN1/CEBPB/ADM2/NR4A1/ARL4D/PTGER4/PLK3/FBXW10/SYNDIG1L/GEM/NFIL3/DOK7/RGS1/BTG2/MAFF/FOSL2/P2RY14/VWC2/SHISA3/IL17C/IL10
BLANCO_MELO_COVID19_SARS_COV_2_INFECTION_A594_ACE2_EXPRESSING_CELLS_UP	C2_curated	476	0.432427	2.16873	1.20209e-17	5.2247e-15	3265	tags=29%, list=15%, signal=26%	TNF/DUSP8/PTX3/CXCL8/MSC/NIPAL4/CXCL1/CXCL3/INHBA/GPR3/LIF/ARC/KCNN1/CCL4/IL11/TNFRSF9/HOTAIRM1/SNAI1/F3/IER3/BCL3/CD83/RELB/IL6/CREB5/LTB/CXCL2/CCL2/ATF3/ZC3H12A/BCL2A1/IFITM1/SOCS1/NR4A3/TWIST1/BHLHE41/RND1/IER5/DUSP10/N4BP3/NFKBIA/TNFAIP3/FILIP1L/NFKBIE/PTGS2/IRAK2/SEMA7A/ARID3B/BMF/FOSL1/UBASH3A/GOLGA7B/NPHS1/KLF6/CCDC73/IER2/SLC16A14/LSMEM1/NFKBID/NFKB2/CSRNP1/BIRC3/ZFP36/RNASEK/GADD45A/IRF1…
LI_INDUCED_T_TO_NATURAL_KILLER_UP	C2_curated	306	0.491442	2.36621	1.52417e-17	6.53256e-15	2846	tags=33%, list=13%, signal=29%	TNF/CCL3/TNFRSF18/LGALS1/CD7/CCL5/DUSP5/ASB2/PDGFA/TNFRSF9/CXCR3/SPP1/IER3/ITGB7/STX11/S100A10/NKG7/LTA/SGK1/AQP9/GADD45G/ADGRG5/PLP2/DOK2/CD69/XCL1/IFITM1/LGALS3BP/SLC24A3/TYROBP/BAG3/HBA2/ZBTB32/PKP3/HAVCR2/TUBB6/TMEM158/JUNB/CDKN1A/UPP1/IRAK2/PIM3/LMNA/SERTAD1/EPOP/FCER1G/BHLHE40/GBP2/FCGR2A/EGR3/IFI30/CXCL9/CDKN2B/SULT2B1/LRP12/NT5E/ITGAD/SLC2A6/CD160/COTL1/FURIN/ANXA2/AHNAK/ID2/CCL4L2/ZNF296…
DAZARD_RESPONSE_TO_UV_NHEK_UP	C2_curated	205	0.552996	2.55461	1.81825e-17	7.68624e-15	5449	tags=51%, list=25%, signal=38%	ADM/CXCL8/CXCL1/CXCL3/HBEGF/PHLDA1/PHLDA2/CCNA1/CXCR3/KYNU/IL1RL1/PMAIP1/FOXC1/IER3/TRIB1/TUBB2A/IL6/S100A9/DLX2/HSPA2/SGK1/CXCL2/PAX8/ATF3/GADD45B/TNFAIP3/APOE/JUNB/PTGS2/PPIF/SOX15/TCN1/PRDM1/IER2/LY6E/LAMA2/SULT2B1/NEU1/ZFP36/IGFBP6/GADD45A/ANXA2/ID2/MT1G/GEM/TAGLN3/COL19A1/HMGCS2/HEXIM1/TGFB1/CCK/UBE2S/CYP11B1/APC2/CRYBA4/BCL2L11/CYBA/EIF1B/ATF4/NKX2-1/KRT34/GAST/COL11A1/CDKN1C/PFN1/ODC1/TXN/…
ZHOU_INFLAMMATORY_RESPONSE_FIMA_UP	C2_curated	486	0.428478	2.15523	3.13383e-17	1.30685e-14	2610	tags=28%, list=12%, signal=25%	TNF/IRF8/PTX3/CXCL8/MSC/NIPAL4/TNFSF9/CXCL1/CXCL3/GNG4/CXCL10/CSF1/GPR84/CCL4/CCNA1/TNFRSF9/MARCKS/TPSAB1/HAS2/G0S2/SNAI1/RETN/ICAM1/IER3/PLEKHH3/CD83/CLCF1/HTRA3/IL23A/RELB/IL6/CREB5/SDC4/CXCL2/SERPINE1/LDLR/ZC3H12A/CYP8B1/SEMA6A/S1PR3/MIR22HG/NINJ1/ASIC1/SERPINB2/NFKBIA/PLAUR/TNFAIP3/WNK4/ODF3B/LEF1/PTGS2/SHD/IRAK2/PIM3/DPYSL3/SLC26A9/EFEMP1/TRPC5/C1QTNF7/ST7-AS1/RIPK2/VEGFA/FOSL1/LINC01270/GAB…
HALLMARK_ALLOGRAFT_REJECTION	Hallmark	195	0.560287	2.5661	3.39076e-17	1.39514e-14	2867	tags=36%, list=13%, signal=32%	TNF/IRF8/CD96/PRF1/INHBA/LIF/CD7/CCL5/CSF1/CCL4/IL11/IL2RA/CXCR3/HLA-G/ICAM1/MMP9/BCL3/IL2RB/IRF4/IL6/IL12RB1/LTB/CCL2/CD28/TRAT1/CD3E/SOCS1/ZAP70/ACHE/IL2RG/TIMP1/CRTAM/LCK/LY86/STAT1/GPR65/RIPK2/FGR/GBP2/CD79A/CCR1/CD3D/CXCL9/ICOSLG/KRT1/NLRP3/EIF5A/TAP1/ITGB2/EGFR/MBL2/IL18RAP/CCL22/CCL19/TGFB1/GZMB/CARTPT/IRF7/ELF4/IL10/CD8A/CDKN2A/IL4/TLR2/ITK/NME1/HIF1A/HLA-A/FAS/RPL3L/HLA-DOB
ENK_UV_RESPONSE_KERATINOCYTE_UP	C2_curated	517	0.416611	2.11421	3.63578e-17	1.47627e-14	5518	tags=38%, list=25%, signal=29%	DUSP8/ADM/RRAD/TNFSF9/CXCL1/LGALS1/CXCL3/DUSP5/HBEGF/PHLDA2/CCNA1/KYNU/HLA-G/FOXC1/IER3/TRIB1/ITGB7/TUBB2A/STX11/SDC4/SGK1/CXCL2/PAX8/ATF3/S100A12/TRAF4/GADD45B/ISG15/PKP3/SLC6A8/TNFAIP3/TST/APOE/JUNB/CDKN1A/CRYAB/PPIF/SPRY2/FXYD2/SNTA1/OVOL1/AREG/IFI30/CD99/EMP3/IER2/MAP2K3/LY6E/PDLIM4/PTH1R/LAMA2/MGAT3/SULT2B1/NEU1/ZFP36/ELL2/IGFBP6/GADD45A/ETS2/NECTIN2/CEBPB/ANXA2/TNFRSF1B/EPHB3/KLK10/MAP1LC3B…
PHONG_TNF_RESPONSE_VIA_P38_PARTIAL	C2_curated	159	0.590205	2.62634	4.13709e-17	1.65801e-14	2098	tags=34%, list=10%, signal=31%	ADM/PTX3/CXCL8/CXCL1/CXCL3/INHBA/LIF/THBS1/HAS2/KYNU/PMAIP1/IER3/TUBB2A/PLAU/IL6/CEBPD/CXCL2/SERPINE1/LDLR/PTHLH/RGS2/BCL6/SERPINB2/DUSP10/PLAUR/TNFAIP3/NFKBIE/PCDH7/JUNB/CDKN1A/GABRA2/PPIF/TRIB2/PLK2/GPRC5A/KLF6/COL7A1/IRS1/NFKB2/BDNF/IRGQ/ID2/PTGER4/REL/EGFR/SDF2L1/HEXIM1/HIVEP1/SLC31A2/TIPARP/DNAJB4/HERPUD1/MAFF/FOSL2
GO_RESPONSE_TO_MOLECULE_OF_BACTERIAL_ORIGIN	C5_GO	339	0.469848	2.28501	4.78078e-17	1.89141e-14	3681	tags=33%, list=17%, signal=28%	TNF/CCL3/IRF8/ADM/CXCL8/CD96/CXCL1/CXCL3/CCL5/CXCL10/IL10RA/STAR/ICAM1/CYP1A1/TRIB1/IL6/LTA/S100A9/CXCL2/CCL2/SERPINE1/MPO/ZC3H12A/CCR7/HPGD/CD6/S100A8/HCK/DUSP10/NFKBIA/TNFAIP3/HAVCR2/CNR2/GPR31/LY86/PTGS2/CXCL11/IRAK2/CSF2/IL36RN/RIPK2/PRKCA/GCH1/C5AR1/PELI1/CD68/ABCA1/CXCL9/BPI/RARA/NFKB2/AXL/ZFP36/NLRP3/THBD/TICAM2/EDN1/CEBPB/NFKBIB/TNFRSF1B/CARD17/DCN/PTGER4/TLR9/CLDN1/IRGM/DAB2IP/NFKB1/PDE4…
ZHOU_INFLAMMATORY_RESPONSE_LIVE_UP	C2_curated	428	0.439063	2.18557	5.39745e-17	2.10835e-14	3166	tags=32%, list=15%, signal=28%	LIN28B/TNF/IRF8/ADM/XIRP1/PTX3/MSC/NIPAL4/TNFSF9/EGR4/CXCL1/CXCL3/LIF/CXCL10/DUSP5/GPR84/CCL4/DUSP2/TNFRSF9/MARCKS/G0S2/ADORA2A-AS1/ICAM1/F3/IER3/CD83/CLCF1/IL23A/RELB/IL6/CREB5/SDC4/CXCL2/IL17RE/SERPINE1/LDLR/ZC3H12A/SEMA6A/S1PR3/MIR22HG/NINJ1/OSR2/NR4A3/SLC28A1/SERPINB2/NFKBIA/PLAUR/TNFAIP3/WNK4/ODF3B/PTGS2/HES4/SHD/IRAK2/PIM3/DPYSL3/SLC26A9/ST7-AS1/RIPK2/VEGFA/FOSL1/CADPS/PRMT5-AS1/ABCA1/SPON1…
CUI_DEVELOPING_HEART_C9_B_T_CELL	C8_cellSignature	148	0.597901	2.62516	6.40564e-17	2.47089e-14	3280	tags=41%, list=15%, signal=35%	CD96/PRF1/CD7/CCL5/DUSP2/SH2D1A/TCF7/GPR183/IL2RB/NKG7/HCST/LTB/ARL4C/CD3E/CD69/IFITM1/ZAP70/IL2RG/ISG15/FAM107B/SLC2A3/NFKBIA/TNFAIP3/LEF1/LCK/CD48/JUNB/CLEC2B/GPR65/FCER1G/ADGRE5/CD3D/CORO1A/LSP1/ZFP36/RUNX3/CST7/IRF1/RGCC/COTL1/PIM2/PTGER4/IFITM2/ITGB2/LPXN/RGS1/TUBA4A/HLA-B/TMIGD2/ISG20/ITK/HLA-A/TSC22D3/CTSW/CD52/LAT/CYTIP/DNAJB1/RHOH/LCP1/SAMSN1
GO_LEUKOCYTE_MIGRATION	C5_GO	494	0.428036	2.15643	7.75433e-17	2.95421e-14	3240	tags=30%, list=15%, signal=26%	ROR2/TNF/CCL3/TNFRSF18/CXCL8/CXCL1/CXCL3/CCL5/CXCL10/THBS1/EPS8/CSF1/CCL4/JCHAIN/CXCR3/ICAM1/TREM1/ITGB7/GPR183/IL23A/COL1A2/IL6/IGKC/S100A9/SDC4/CXCL2/CCL2/CD177/SDC2/SERPINE1/CCR7/S100A12/EPX/DOK2/FOXJ1/XCL1/ZAP70/S100A8/HCK/TNFSF11/PRTN3/IL34/ANXA1/CNR2/TBX21/CRTAM/LCK/CD48/CXCL11/SLC7A10/ITGAX/ESAM/GATA3/IGLV1-40/FCER1G/EDN3/VEGFA/C5AR1/CCR1/AZU1/S1PR1/HMOX1/CD99/DYSF/CXCL9/CORO1A/CH25H/FPR2/…
GSE9988_ANTI_TREM1_VS_VEHICLE_TREATED_MONOCYTES_UP	C7_immunologic	184	0.564406	2.55967	8.5257e-17	3.20847e-14	2951	tags=38%, list=14%, signal=33%	RRAD/CXCL8/CXCL3/INHBA/NRIP3/DUSP5/CSF1/HIC1/CCNA1/SPP1/F3/TRIB1/RAB20/SH3BP5/SGK1/CXCL2/DUSP4/EGR2/S1PR3/MIR22HG/MMP19/CHAC1/BAG3/KBTBD8/HAVCR2/CRTAM/TUBB6/CDKN1A/UPP1/PTGS2/SESN2/OLIG2/FOSL1/GPRC5A/NEU1/LINC01010/NRARP/CSRNP1/CDC42EP3/ATP2B1-AS1/ETS2/CTSV/FERMT2/EDN1/CEBPB/MT1H/B3GNT5/HOMER1/MT1G/SLC3A2/GEM/ADNP2/NAB2/RGS1/DTL/DNAJB5/ZNF674-AS1/MT1E/AKIRIN2/TMEM217/ZBTB43/MAPK6/SGMS2/FABP5/RASG…
BLANCO_MELO_COVID19_SARS_COV_2_LOW_MOI_INFECTION_A594_ACE2_EXPRESSING_CELLS_UP	C2_curated	147	0.602928	2.63622	1.00396e-16	3.73269e-14	2292	tags=37%, list=11%, signal=34%	TNF/DUSP8/PTX3/CXCL8/CXCL1/CXCL3/ARC/CCL4/ICAM1/IER3/BCL3/CD83/NGFR/IL23A/DLX2/LTB/CXCL2/CCL2/ATF3/RASD1/ZC3H12A/C2orf66/EGR2/ACHE/NR4A3/BHLHE41/IER5/NFKBIA/TNFAIP3/NFKBIE/JUNB/PTGS2/EGR3/IER2/LSMEM1/VGF/NFKBID/CSRNP1/ZFP36/IRF1/CEMIP/HRH3/SOCS3/NR4A1/LINC00472/ARRDC3/REL/NFIL3/DDIT3/GRHL1/MAFF/ZBTB43/HLA-B/IRF7/FGG
QI_PLASMACYTOMA_UP	C2_curated	253	0.509197	2.40431	1.22131e-16	4.48671e-14	2159	tags=31%, list=10%, signal=28%	TNF/CCL3/IRF8/RRAD/CD7/CCL5/PHLDA2/DUSP2/SH2D1A/MARCKS/NTN1/ITGB7/IL21R/RELB/IL2RB/LTB/TRAT1/CD3E/IL5RA/XCL1/SOCS1/ZAP70/IL2RG/HCK/TNFSF11/RRAS2/NFKBIA/TNFAIP3/PRTN3/NFKBIE/CNR2/LCK/ACTG2/LY86/RGL1/FGR/BHLHE40/GBP2/CD79A/CCR1/SLAMF1/CD3D/SH3BP1/TNFAIP2/GNA15/CSF1R/AXL/LSP1/CDC42EP3/PDGFB/CST7/IRF1/LST1/PLEKHO1/FSCN1/ID2/CCL4L2/IGF1/TLR9/SPIB/TRAF1/ITGB2/ABI3/IRGM/TMSB4X/IL18RAP/DNASE1L2/DDT/ALOX5…
MODULE_5	C4_computational	425	0.43852	2.18461	1.39308e-16	5.05752e-14	3337	tags=33%, list=15%, signal=29%	CCL3/ADM/PTX3/CXCL8/CXCL1/CCL5/THBS1/IL1RN/TPSAB1/JCHAIN/G0S2/ICAM1/F3/IER3/MMP9/SERPINA1/COL6A2/COL1A2/AGR2/IL6/NKG7/FCN1/S100A9/CXCL2/CCL2/CNN3/LDLR/HPGD/LRRC32/NEDD9/S100A8/IL2RG/HCK/SLC2A3/RGS2/RAB31/COL6A1/CCND1/PLAUR/TNFAIP3/CYP1B1/ANXA1/APOE/JUNB/CDKN1A/UPP1/PLIN2/S100P/CLEC2B/CRYAB/DPYSL3/STAT1/FGR/GBP1/LDB2/FCER1G/VEGFA/CYBB/APOC1/ADGRE5/FCGR2A/CCR1/RHOB/GPRC5A/HMOX1/EMP3/MAP2K3/NEBL/COR…
BASSO_CD40_SIGNALING_UP	C2_curated	102	0.660027	2.72792	1.58774e-16	5.69721e-14	2310	tags=40%, list=11%, signal=36%	TNF/CCL3/TNFSF9/LGALS1/CCL4/DUSP2/ICAM1/IER3/CD83/GPR183/IRF4/LTA/CCR7/BCL2A1/LRRC32/GADD45B/NFKBIA/MAP3K8/TNFAIP3/NFKBIE/JUNB/STAT1/SLAMF1/IFI30/TNFAIP2/ICOSLG/NFKB2/ELL2/SH2B3/NCF2/TRAF1/TAP1/TMSB4X/DDIT4/CCL22/RGS1/ADAM8/ZFP36L1/SNN/PTP4A3/MAPKAPK2
BLANCO_MELO_COVID19_SARS_COV_2_POS_PATIENT_LUNG_TISSUE_UP	C2_curated	158	0.58283	2.58956	2.06663e-16	7.33038e-14	3270	tags=43%, list=15%, signal=37%	TNF/TPSB2/CXCL10/GPR84/CCL4/IL1RN/MARCKS/TREM1/LILRA5/AQP9/S100A12/BCL2A1/IFITM1/S100A8/APOBEC3A/IL2RG/ISG15/C19orf84/TYROBP/DNAAF1/S100P/GBP5/KCNH7/KCNJ2/FCER1G/GCH1/CHI3L1/CACNA1A/TCN1/FPR1/BCL2L14/BASP1/HBA1/CASP5/C3AR1/CHI3L2/CLEC4D/GTSF1/CSTA/LILRA6/CCDC140/IFIT3/IFI6/CARD17/SYN1/IFITM2/KLK10/CLC/IFIT2/FFAR2/EPSTI1/ALOX5AP/CCL19/STAP1/CRISP3/S100A11/IL17C/LY96/ZBP1/ACOD1/MIR3945HG/CEACAM3/RN…
GO_CYTOKINE_ACTIVITY	C5_GO	231	0.516565	2.40529	3.26237e-16	1.14402e-13	2597	tags=32%, list=12%, signal=28%	TNF/CCL3/CXCL8/TNFSF9/CXCL1/CXCL3/INHBA/LIF/CCL5/CXCL10/CSF1/CCL4/IL11/IL1RN/CD70/SPP1/CLCF1/IL23A/IL6/LTA/WNT10B/LTB/CXCL2/WNT1/CCL2/XCL1/TNFSF11/TIMP1/IL34/GREM2/WNT9A/CXCL11/CSF2/CNTF/IL36RN/WNT11/VEGFA/WNT10A/AREG/CXCL9/CCL3L3/BMP3/CCL3L1/EBI3/EDN1/IL25/IL3/IFNA7/WNT5B/FLT3LG/CMTM3/IL22/BMP8A/CCL22/CCL19/TGFB1/TNFSF8/CMTM2/WNT4/WNT9B/IFNA10/C1QTNF4/IL17C/OSM/MIF/CCL25/KITLG/IFNA5/IL10/CSF3/IL…
GSE9601_NFKB_INHIBITOR_VS_PI3K_INHIBITOR_TREATED_HCMV_INF_MONOCYTE_DN	C7_immunologic	193	0.54867	2.50112	3.90278e-16	1.35321e-13	2520	tags=34%, list=12%, signal=31%	CD276/ADM/HDC/LIF/NPPC/CCL5/HBEGF/CCL4/IL2RA/TNFRSF9/IL1RN/TFPI2/SLC15A3/TRIB1/RAB20/HAS1/ARSI/SDC4/CCL2/SOAT2/SOCS1/LGALS3BP/HCK/TIMP1/ZBTB32/MAP3K8/TUBB6/CDKN1A/UPP1/PTGS2/CXCL11/CILP2/RDH10/GBP2/CYBB/SIX3/MARCKSL1/CXCL9/KLF6/BASP1/FPR2/EZR/RUNX3/FERMT2/EDN1/IFIT3/FURIN/ID2/NTS/GLIPR2/GEM/IFIT2/IL22/NFIL3/CLIC4/MAFF/GZMB/MT1E/IRF7/BCL2L11/IL10/CSF3/CACNA2D1/ZBP1/MAPK6/ACOD1
GO_LEUKOCYTE_DIFFERENTIATION	C5_GO	528	0.406724	2.06594	6.69725e-16	2.29634e-13	2653	tags=24%, list=12%, signal=21%	ROR2/TNF/CCL3/TNFRSF18/TNFSF9/LGALS1/INHBA/LIF/CSF1/IL11/IL2RA/TCF7/HLA-G/TESC/TRIB1/MMP9/BCL3/CD83/CLCF1/GPR183/IL23A/RELB/IRF4/IL6/IL12RB1/FZD8/WNT1/LFNG/CD28/ZC3H12A/POU1F1/CCR7/CD3E/FOXJ1/SOCS1/ZAP70/NTRK1/TNFSF11/BCL6/HLX/TYROBP/DUSP10/PRTN3/IL34/ANXA1/TBX21/CRTAM/LEF1/LCK/JUNB/SHH/CSF2/RIPK2/MAFB/GATA3/FCER1G/PRKCA/VEGFA/CD79A/CCR1/EGR3/CD3D/PRDM1/ZNF683/KLF6/RARA/NFKBID/CSF1R/TSPAN2/CLEC4D…
GSE29617_CTRL_VS_DAY7_TIV_FLU_VACCINE_PBMC_2008_UP	C7_immunologic	189	0.554094	2.51796	6.85001e-16	2.32291e-13	2370	tags=34%, list=11%, signal=30%	ZNF703/CXCL8/LIF/CXCL10/HCAR3/HBEGF/DUSP2/FEZ1/G0S2/STX11/BCL3/CD83/GPR183/SGK1/CXCL2/ATF3/EGR2/CD69/NR4A3/SLC2A3/RGS2/SERPINB2/N4BP3/DCX/METRNL/JUNB/CDKN1A/PTGS2/CLEC2B/RIPK2/SAT1/C5AR1/EGR3/PLK2/RHOB/AREG/SLC16A6/CSRNP1/MIR3142HG/SH2B3/PTP4A1/KLHL15/SOCS3/B3GNT5/NTRK2/NR4A1/PTGER4/ITPRIP/PFKFB3/ARL5B/REL/IFIT2/TIGAR/NFIL3/RGS1/BTG2/FAM53C/TIPARP/FOSL2/MEX3C/ELF4/PLPPR1/OSM/PITX1
GSE22140_HEALTHY_VS_ARTHRITIC_GERMFREE_MOUSE_CD4_TCELL_DN	C7_immunologic	199	0.54142	2.48263	6.93686e-16	2.32679e-13	1999	tags=33%, list=9%, signal=30%	TNF/CCL3/IRF8/PTX3/MSC/CXCL1/LGALS1/DUSP5/THBS1/CCL4/DUSP2/TNFRSF9/ICAM1/PMAIP1/IER3/TRIB1/OASL/TUBB2A/SH3BP5/SERPINE1/MIR22HG/SLC2A3/TIMP1/HLX/SERPINB2/CDKN1A/UPP1/PPIF/LMNA/FCGR2A/CCR1/HMOX1/CD99/EMP3/KLF6/MAP2K3/TNFAIP2/GNA15/EZR/NQO1/NFKB2/ELL2/PDGFB/IRF1/FERMT2/TEX30/PTP4A1/IFIT3/FURIN/TNFRSF1B/PTGER4/IGF1/RNF19B/TRAF1/CLIC1/SLC3A2/HMGA1/GEM/IFIT2/NFKB1/RGS1/BTG2/MTSS1/TNFSF8/PIM1
AIZARANI_LIVER_C25_KUPFFER_CELLS_4	C8_cellSignature	170	0.566837	2.52728	7.08799e-16	2.35192e-13	2610	tags=39%, list=12%, signal=35%	IRF8/CXCL8/CXCL3/THBS1/HBEGF/IL1RN/SLC15A3/PMAIP1/IER3/CD83/GPR183/IRF4/FCN1/SGK1/NR4A3/HCK/RGS2/RAB31/CLEC7A/TYROBP/MAP3K8/PLAUR/ANXA1/METRNL/ITGAX/FGR/MAFB/FCER1G/SAT1/VEGFA/CYBB/C5AR1/FCGR2A/AREG/FPR1/BASP1/RNASE6/CSF1R/ICOSLG/LILRB3/HSPA6/NLRP3/THBD/SH2B3/LST1/RGCC/COTL1/MPEG1/TNFRSF1B/B3GNT5/NCF2/AHR/REL/ITGB2/VIM/RGS1/S100A11/HERPUD1/MNDA/GZMB/ATP2B1/ACTB/SAMHD1/TMSB10/CD1C/LILRB1/TLR2
REACTOME_CLASS_A_1_RHODOPSIN_LIKE_RECEPTORS_	C2_curated	328	0.46772	2.27369	8.04238e-16	2.64021e-13	4002	tags=38%, list=18%, signal=31%	CCL3/CXCL8/CXCL1/CXCL3/HCAR1/CCL5/CXCL10/HCAR3/CCL4/CXCR3/GPR183/ECE1/TRH/HCAR2/SSTR2/CHRM4/CXCL2/PROK2/CCL2/GPBAR1/CCR7/ADRA2B/S1PR3/XCL1/NPW/GPER1/ANXA1/CNR2/ADRB1/GPR31/CCR4/CXCL11/LPAR5/GPR65/GALR2/PLPPR3/GAL/NMB/EDN3/NPFFR1/C5AR1/F2RL3/CCR1/S1PR1/FPR1/GHRL/CXCL9/DRD5/FPR2/CCL3L3/C3AR1/ECE2/GPHA2/NTSR1/CCL3L1/INSL3/PTGDR/GPR132/OPN5/S1PR2/CCR9/EDN1/HRH3/OPRK1/PTGER4/FFAR4/NTS/HTR7/HTR5A/FFAR2…
GHANDHI_BYSTANDER_IRRADIATION_UP	C2_curated	79	0.70302	2.79334	8.43682e-16	2.74055e-13	2139	tags=42%, list=10%, signal=38%	CXCL8/CXCL1/CXCL3/INHBA/LIF/CXCL10/DUSP5/DUSP2/G0S2/KYNU/TESC/RELB/CREB5/CXCL2/GADD45G/BCL2A1/CD69/SERPINB2/TNFAIP3/PTGS2/SAT1/GCH1/SLC16A6/BIRC3/MT1H/RGS9/B3GNT5/MT1G/AHR/DNAJB4/OSGIN2/PLEK2/MT1E
GSE22886_NAIVE_BCELL_VS_NEUTROPHIL_DN	C7_immunologic	193	0.543371	2.47697	1.10696e-15	3.55831e-13	2097	tags=29%, list=10%, signal=26%	ADM/CXCL8/CXCL1/HCAR3/TREM1/IER3/TRIB1/BCL3/SERPINA1/ECE1/CEBPD/FCN1/S100A9/AQP9/S100A12/BCL2A1/IFITM1/MIR22HG/NINJ1/S100A8/APOBEC3A/HCK/RAB31/HLX/CLEC7A/TYROBP/ADAP1/S100P/PTGS2/KCNJ2/FCER1G/C5AR1/ADGRE5/FCGR2A/FPR1/TNFRSF10C/LILRB3/HSPA6/CSTA/EFHD2/ADGRE3/LST1/IFIT3/TNFRSF1B/IFI6/CFD/ID2/NCF2/IFITM2/CLC/FFAR2/NFIL3/SLC31A2/S100A11/ADAM8/MNDA
HAY_BONE_MARROW_IMMATURE_NEUTROPHIL	C8_cellSignature	193	0.543036	2.47544	1.13629e-15	3.61491e-13	4684	tags=49%, list=22%, signal=39%	HCAR3/HBEGF/PHLDA2/LUCAT1/IL10RA/G0S2/ICAM1/IER3/RAB20/BCL3/CD300E/CEBPD/SGK1/BCL2A1/MIR22HG/NINJ1/APOBEC3A/CLEC7A/IER5/NFKBIA/MAP3K8/ODF3B/METRNL/CDKN1A/UPP1/PLIN2/RIPK2/MAFB/VEGFA/BHLHE40/FCGR2A/CCR1/PELI1/IFI30/HMOX1/ABCA1/EMP3/SLC43A2/CCL3L3/SLC16A6/TNFAIP2/ICOSLG/IER5L/NLRP3/THBD/ATP2B1-AS1/SH2B3/CEBPB/PTP4A1/B3GNT5/IFI6/FCGR1A/AHR/C15orf48/PFKFB3/RNF19B/ARRDC3/VMP1/LACTB/DDIT3/SLC30A1/FUOM/…
MARZEC_IL2_SIGNALING_UP	C2_curated	113	0.633412	2.68381	1.2355e-15	3.89045e-13	2425	tags=36%, list=11%, signal=32%	CCL3/TNFRSF4/TNFRSF18/CXCL8/WT1/LIF/PHLDA1/PHLDA2/DUSP2/IL2RA/TNFRSF9/IL10RA/TNFRSF12A/SPP1/IER3/IL2RB/PDE4A/DUSP4/SOCS1/GADD45B/RRAS2/CCND1/CCR4/CSF2/VEGFA/RHOB/CSRNP1/BIRC3/CCNE1/RGCC/TNFRSF1B/FGFR1/AHR/IL18RAP/CARD10/TGFB1/PIM1/CDC25A/MAPKAPK2/OSM/IL10
GO_MYELOID_LEUKOCYTE_MIGRATION	C5_GO	210	0.530817	2.46004	1.47961e-15	4.61206e-13	3295	tags=37%, list=15%, signal=31%	ROR2/CCL3/CXCL8/CXCL1/CXCL3/CCL5/CXCL10/THBS1/CSF1/CCL4/IL23A/IL6/S100A9/CXCL2/CCL2/CD177/SERPINE1/CCR7/S100A12/EPX/XCL1/S100A8/TNFSF11/PRTN3/IL34/ANXA1/CXCL11/FCER1G/EDN3/VEGFA/C5AR1/CCR1/AZU1/CD99/DYSF/CXCL9/FPR2/CCL3L3/C3AR1/CSF1R/CCL3L1/PGF/PDGFB/DPEP1/EDN1/RHOG/XG/PTGER4/ITGB2/DDT/CCL22/PDE4D/CCL19/STAP1/AKIRIN1/PLA2G7/SLIT2/ADAM8/LGALS3/PDE4B/UMODL1/MIF/CCL25/C1QBP/IL17A/IL4/CCL18/ARHGEF5/D…
GSE2706_UNSTIM_VS_8H_R848_DC_DN	C7_immunologic	187	0.544629	2.47923	1.66141e-15	5.12695e-13	3094	tags=39%, list=14%, signal=33%	TNF/TNFRSF4/INHBA/CXCL10/DUSP5/THBS1/FEZ1/G0S2/PMAIP1/CD70/STX11/RELB/IL6/LILRA5/LTA/ZC3H12A/CCR7/DUSP4/TCAF2/APOBEC3A/NR4A3/GADD45B/ISG15/MAP3K8/TNFAIP3/CD48/SHROOM3/CXCL11/TTN/STAT1/GBP1/SAT1/SLAMF1/FXYD6/MARCKSL1/C17orf58/TNFAIP2/BIRC3/EBI3/GADD45A/NANOS1/IFIT3/SOCS3/IFI6/PIM2/SLC5A9/ARL4D/PTGER4/ABTB2/C15orf48/TRAF1/TNFAIP6/REL/IFIT2/EPSTI1/HIVEP1/NFKB1/SIPA1L1/RGS1/GRHL1/UHRF1/ISG20/TNC/SLC1…
GSE22886_DAY0_VS_DAY1_MONOCYTE_IN_CULTURE_DN	C7_immunologic	193	0.538724	2.45579	2.22486e-15	6.79772e-13	4198	tags=44%, list=19%, signal=36%	TNFRSF4/CXCL1/CXCL3/INHBA/NRIP3/HBEGF/CCL4/CCNA1/IL1RN/KYNU/SPP1/IER3/MMP9/SOWAHC/IL6/SH3BP5/SDC4/CXCL2/PDE4A/CCL2/GADD45G/ZC3H12A/CCR7/DUSP4/MT2A/NINJ1/MMP19/SLC2A3/SERPINB2/CYP1B1/NFKBIE/TUBB6/CDKN1A/UPP1/PLIN2/PTGS2/RGL1/PPIF/LMNA/BASP1/GNA15/NQO1/SLC7A5/BIRC3/EBI3/ETS2/CTSV/MT1H/TNFRSF1B/PIM2/PFKFB3/TRAF1/TNFAIP6/SLC3A2/CCL22/PIM1/PLA2G7/MAFF/ADAMDEC1/ZBTB43/CD63/MAPK6/RHOF/C3/PSMB5/PPP1R14B/…
GO_POSITIVE_REGULATION_OF_CELL_ACTIVATION	C5_GO	388	0.440482	2.17138	2.29362e-15	6.9391e-13	3556	tags=30%, list=16%, signal=26%	CCL3/CD276/TNFRSF4/TNFSF9/LGALS1/CLECL1/CCL5/THBS1/IL2RA/IL1RL1/HLA-G/CD70/CD83/CLCF1/GPR183/IL23A/IL6/PDCD1/LILRA5/IGKC/IL12RB1/CCL2/CD177/CD28/CCR7/CD3E/XCL1/SOCS1/ZAP70/CD6/NR4A3/TNFSF11/BCL6/HLX/CLEC7A/TYROBP/DUSP10/MAP3K8/HAVCR2/ANXA1/TBX21/LEF1/LCK/CDKN1A/CD5/SHH/TNFRSF13C/RIPK2/FGR/SOX15/GATA3/FCER1G/EGR3/PELI1/RARA/CORO1A/NFKBID/ICOSLG/CLEC4D/TRBC2/AXL/CHRNB2/NLRP3/CD27/EBI3/RUNX3/CD160/S…
NABA_SECRETED_FACTORS	C2_curated	340	0.455152	2.21243	2.3343e-15	6.99362e-13	3353	tags=33%, list=15%, signal=29%	TNF/CCL3/CXCL8/TNFSF9/CXCL1/CXCL3/INHBA/LIF/CCL5/CXCL10/HBEGF/CSF1/CCL4/PDGFA/IL11/IL1RN/CLCF1/IL23A/S100A10/IL6/LTA/S100A9/WNT10B/LTB/CXCL2/WNT1/CCL2/S100A12/SFRP4/XCL1/S100A8/TNFSF11/S100A5/IL34/WNT9A/S100P/CXCL11/SHH/FGF21/CSF2/CNTF/IL36RN/WNT11/CBLN2/VEGFA/SCUBE1/WNT10A/AREG/CXCL9/CCL3L3/BMP3/FGF6/NGF/BDNF/INSL3/FGF14/PGF/EBI3/PDGFB/SCUBE2/DHH/IL25/FLG2/IL3/FLG/CCL4L2/IGF1/IFNA7/WNT5B/FLT3LG/…
GSE29618_PDC_VS_MDC_DN	C7_immunologic	194	0.540471	2.46631	2.50078e-15	7.42035e-13	4079	tags=46%, list=19%, signal=38%	LGALS1/IL1RN/MARCKS/GAS7/TRIB1/STX11/S100A10/CEBPD/CREB5/FCN1/S100A9/SGK1/BCL2A1/PDLIM1/HCK/SLC2A3/RAB31/TIMP1/BCL6/CLEC7A/ANXA1/LY86/JUNB/PTGS2/ITGAX/PPIF/LMNA/FGR/GBP1/VEGFA/GBP2/FCGR2A/RHOB/IFI30/EMP3/BASP1/CD33/TNFAIP2/CSTA/LILRA1/EFHD2/LST1/PLEKHO1/RHOG/IQGAP1/COL9A2/COTL1/ANXA2/ID2/NCF2/PTGER4/AHR/IFITM2/ITGB2/CD1A/RGS10/CD1E/TIPARP/ITGAM/ADAM8/MNDA/LGALS3/ZFP36L1/ATP2B1/TMSB10/CD1C/CNN2/HI…
LINDSTEDT_DENDRITIC_CELL_MATURATION_A	C2_curated	61	0.736388	2.77316	2.56505e-15	7.53855e-13	1655	tags=46%, list=8%, signal=43%	TNF/CCL3/TNFRSF4/CXCL8/TNFSF9/CXCL1/INHBA/CCL5/CXCL10/HCAR3/CCL4/IL1RN/KYNU/ICAM1/IL6/CXCL2/CCL2/ISG15/NFKBIE/CD48/CXCL11/CSF2/STAT1/GBP1/SLC7A5/EDN1/PTGER4/SLC3A2
GO_REGULATION_OF_T_CELL_ACTIVATION	C5_GO	322	0.462381	2.23702	2.80943e-15	8.17887e-13	2573	tags=27%, list=12%, signal=24%	CD276/TNFRSF18/TNFSF9/LGALS1/CLECL1/CCL5/IL2RA/TCF7/HLA-G/CD70/CD83/LAX1/IL23A/IRF4/IL6/PDCD1/IL12RB1/SDC4/CCL2/CD28/ZC3H12A/CCR7/CD3E/FOXJ1/XCL1/SOCS1/ZAP70/LRRC32/CD6/TNFSF11/BCL6/HLX/DUSP10/MAP3K8/HAVCR2/ANXA1/TBX21/CRTAM/LEF1/LCK/CD5/SHH/TNFRSF13C/RIPK2/GATA3/EGR3/PELI1/PRDM1/ZNF683/RARA/CORO1A/NFKBID/ICOSLG/NRARP/PLA2G2F/NLRP3/CD27/EBI3/RUNX3/IRF1/CD160/SOX4/CEBPB/TIGIT/TNFRSF1B/ICOS/HES1/IG…
GSE7219_WT_VS_NIK_NFKB2_KO_DC_UP	C7_immunologic	181	0.555622	2.52555	2.84084e-15	8.19304e-13	3288	tags=39%, list=15%, signal=33%	TNF/CCL3/RRAD/CXCL10/PHLDA1/CCL4/DUSP2/IL2RA/PMAIP1/IL21R/PDCD1/ATF3/TRAF4/XCL1/NEDD9/GADD45B/NFKBIA/HAVCR2/SH2D2A/STAT1/HPGDS/CBX4/RHOB/DOCK9/SPRY1/SLC7A5/ZFP36/GPR132/ETS2/UBC/COTL1/SOCS3/TLR7/TNFRSF1B/PTGER4/PLK3/ARRDC3/ARL5B/GEM/NFIL3/PDE4D/LILRB4/LPXN/SIPA1L1/RGS1/UBE2S/DNAJB4/CLIC4/HERPUD1/SMAD7/FOSL2/GZMB/ZFP36L1/MEX3C/IRF7/PDE4B/ISG20/TOX/ZBP1/ITM2C/ITK/HIF1A/HSP90AA1/SERTAD2/USP18/DNAJB1…
GSE21360_PRIMARY_VS_TERTIARY_MEMORY_CD8_TCELL_DN	C7_immunologic	192	0.537459	2.44678	2.90425e-15	8.29835e-13	3468	tags=36%, list=16%, signal=30%	TNF/IRF8/TNFSF9/CCL5/CXCL10/DUSP5/IL2RA/IL10RA/ICAM1/PMAIP1/F3/CYP1A1/TRIB1/CD83/IL1RAP/IRF4/IL6/SSTR2/SDC4/GADD45G/BCL2A1/CD69/IFITM1/SOCS1/GADD45B/SERPINB2/JUNB/CDKN1A/CXCL11/GBP1/GBP2/ADGRE5/TCN1/CXCL9/TNFAIP2/ZFP36/PDGFB/IRF1/NECTIN2/SOCS3/PIM2/PTGER4/ST3GAL5/FCGR1A/RNF19B/TRAF1/TAP1/GEM/IL15RA/NRP2/SLC31A2/PIM1/P2RY14/IRF7/ISG20/JMJD6/CCL18/SERTAD2/TSC22D3/SEPHS2/TXN/TYMP/RHOH/RAB32/ACVR1B/U…
GO_GRANULOCYTE_MIGRATION	C5_GO	144	0.58765	2.56261	3.22885e-15	9.14119e-13	3295	tags=42%, list=15%, signal=36%	CCL3/CXCL8/CXCL1/CXCL3/CCL5/CXCL10/THBS1/CSF1/CCL4/IL23A/S100A9/CXCL2/CCL2/CD177/CCR7/S100A12/EPX/XCL1/S100A8/PRTN3/IL34/ANXA1/CXCL11/FCER1G/EDN3/C5AR1/CD99/DYSF/CXCL9/CCL3L3/C3AR1/CSF1R/CCL3L1/DPEP1/EDN1/RHOG/XG/PTGER4/ITGB2/CCL22/PDE4D/CCL19/AKIRIN1/SLIT2/ADAM8/LGALS3/PDE4B/UMODL1/CCL25/C1QBP/IL17A/IL4/CCL18/DAPK2/RARRES2/CKLF/CCL15/CAMK1D/CXCL17/RHOH/CXCL13
DELYS_THYROID_CANCER_UP	C2_curated	437	0.427554	2.12745	4.13337e-15	1.15956e-12	3088	tags=32%, list=14%, signal=28%	TPSB2/ADM/CXCL8/LGALS1/INHBA/LIF/DUSP5/THBS1/EPS8/PHLDA2/SH2D1A/IL1RN/IL10RA/HAS2/G0S2/ROR1/ICAM1/PMAIP1/TREM1/SPP1/IER3/ITGB7/SERPINA1/ECE1/IL1RAP/S100A10/AGR2/PLAU/SDC4/CXCL2/DUSP4/BCL2A1/PDLIM1/NINJ1/TIMP1/EPHA4/CCND1/MRC2/ERBB3/S100A5/CYP1B1/ANXA1/PCDH7/APOE/CDKN1A/UPP1/PLIN2/DPYSL3/STAT1/TRPC5/KCNK5/NMB/BHLHE40/RAMP1/GBP2/APOC1/ADGRE5/FCGR2A/CHI3L1/CCR1/CAMK2A/CHIT1/AREG/DOCK9/SFN/IFI30/PRDM…
GO_INNATE_IMMUNE_RESPONSE	C5_GO	932	0.344048	1.82288	4.28961e-15	1.19255e-12	3839	tags=26%, list=18%, signal=22%	CCL3/IRF8/PTX3/CD96/CCL5/CSF1/CCL4/SH2D1A/JCHAIN/KYNU/HLA-G/STAR/ICAM1/TREM1/OASL/RAB20/IL23A/RELB/CD300E/IL1RAP/IRF4/NCR3/LILRA5/IGKC/FCN1/S100A9/IL12RB1/PYHIN1/CCL2/CD177/S100A12/XCL1/IFITM1/SOCS1/ZAP70/MT2A/CD6/S100A8/APOBEC3A/HCK/GPER1/ISG15/F12/CLEC7A/TYROBP/DUSP10/TNFAIP3/IL34/HAVCR2/ANXA1/CRTAM/LCK/LY86/APOE/GBP5/MUC4/ULBP2/STAT1/IL36RN/RIPK2/FGR/GATA3/GBP1/FCER1G/GBP2/CYBB/GCH1/SUSD4/SLAM…
GO_T_CELL_ACTIVATION	C5_GO	473	0.417264	2.09261	4.4962e-15	1.23882e-12	2618	tags=24%, list=12%, signal=22%	CD276/TNFRSF4/TNFRSF18/TNFSF9/LGALS1/CD7/CLECL1/CCL5/IL2RA/TCF7/HLA-G/ICAM1/CD70/BCL3/CD83/GPR183/LAX1/IL23A/RELB/IRF4/IL6/PDCD1/IL12RB1/FZD8/SDC4/WNT1/CCL2/LFNG/CD28/ZC3H12A/CCR7/CD3E/FOXJ1/XCL1/SOCS1/ZAP70/LRRC32/CD6/TNFSF11/BCL6/HLX/CLEC7A/DUSP10/MAP3K8/HAVCR2/ANXA1/TBX21/CRTAM/LEF1/LCK/CD5/SHH/TNFRSF13C/RIPK2/MAFB/GATA3/FCER1G/EGR3/PELI1/CD3D/PRDM1/ZNF683/RARA/CORO1A/NFKBID/ICOSLG/CLEC4D/NRAR…
GSE8515_IL1_VS_IL6_4H_STIM_MAC_UP	C7_immunologic	194	0.536659	2.44892	5.08574e-15	1.38886e-12	2275	tags=28%, list=10%, signal=26%	TNF/PTX3/TNFRSF4/CXCL8/MSC/TNFSF9/CXCL1/CXCL3/HCAR3/CCL4/PHLDA2/G0S2/ICAM1/CD70/IER3/STX11/CD83/RELB/IL6/SDC4/CXCL2/CCR7/TENM1/SERPINB2/NFKBIA/TNFAIP3/JUNB/PTGS2/PPIF/RIPK2/EGR3/DOCK9/MARCKSL1/SLC16A6/NFKB2/EBI3/SLC2A6/POU3F1/KPNA2/PIM2/NCF2/PTGER4/PLK3/RAP2C/CHST2/TRAF1/TNFAIP6/REL/NFKB1/BTG2/MAFF/CENPN/SNN/PRKCD/PDE4B
LAKE_ADULT_KIDNEY_C14_DISTAL_CONVOLUTED_TUBULE	C8_cellSignature	204	-0.545282	-2.45637	5.14045e-15	1.39148e-12	4064	tags=41%, list=19%, signal=33%	TRPM7/DNAH14/UBR3/MBD5/AHI1/ARHGAP5/CBLB/PKP4/CADM1/RALGAPA1/HDAC8/IMMP2L/CCSER1/DPH6/PTPRG/TBL1X/SCN2A/CASR/COMMD10/MSI2/OPHN1/PDE8A/ITPR1/DANT2/TNRC6B/ANKRD26/CNNM2/SCAPER/HIBCH/C20orf194/ZNF518A/SBF2/RNF150/DYNC2H1/MITF/MTR/FRMD3/FGF13/TAPT1-AS1/KIAA1217/APBB2/UBA6-AS1/PTPN4/NAALADL2/ANK3/NHS/FGD4/RAD51B/FMN1/PARD3B/PTH2R/KLHL3/FTX/NOS1AP/JPX/CTDSPL/EXOC6B/ARHGAP6/TRIM2/ABCA5/EGF/DST/ZNF704/GP…
GSE22140_GERMFREE_VS_SPF_MOUSE_CD4_TCELL_UP	C7_immunologic	195	0.536986	2.45938	5.43202e-15	1.45762e-12	2597	tags=29%, list=12%, signal=26%	TNF/IRF8/CD96/CD7/CXCL10/DUSP5/CCNA1/IL10RA/ICAM1/TRIB1/OASL/BCL3/IRF4/SSTR2/BCL2A1/CD69/IFITM1/SOCS1/HCK/GADD45B/ISG15/LEF1/JUNB/CDKN1A/CXCL11/TTN/GBP1/GBP2/GCH1/CXCL9/KLF6/BMP3/TNFAIP2/ZFP36/PDGFB/IRF1/NECTIN2/IFIT3/SOCS3/FURIN/FCGR1A/RNF19B/CLIC1/TAP1/GEM/IFIT2/C1S/SLC31A2/PIM1/UBE2S/HHLA1/P2RY14/IRF7/ISG20/BCL2L11/JMJD6/CCL18
POOLA_INVASIVE_BREAST_CANCER_UP	C2_curated	286	0.48395	2.30668	5.49031e-15	1.46056e-12	4085	tags=40%, list=19%, signal=33%	CCL3/IRF8/INHBA/CXCL10/CCL4/CXCR3/MMP9/GPR183/CPNE7/LTB/SERPINE1/TRAT1/CCR7/BCL2A1/CD69/CD6/MMP19/IL2RG/CLEC7A/PLAUR/LCK/CD48/S100P/CXCL11/ITGAX/GPR65/MAFB/GBP1/FCER1G/CD79A/APOC1/PRR16/FCGR2A/CCR1/CHIT1/CD3D/IFI30/CXCL9/CH25H/TRBC2/SLC7A5/CD27/CST7/FCGR3A/LST1/CEMIP/PCLAF/COTL1/TRDC/CDH11/PTTG1/NCF2/FCGR1A/TRAF1/TNFAIP6/ITGB2/LMO3/COL6A3/NEK2/LILRB4/LPXN/DTL/LRRC15/CD1E/PLA2G7/MNDA/ADAMDEC1/GZMB…
GSE22196_HEALTHY_VS_OBESE_MOUSE_SKIN_GAMMADELTA_TCELL_DN	C7_immunologic	196	0.537144	2.46027	6.32805e-15	1.66904e-12	2310	tags=30%, list=11%, signal=27%	RPS4Y1/CCL3/PTX3/CXCL8/MSC/LGALS1/THBS1/CCL4/PHLDA2/DUSP2/G0S2/IER3/CYP1A1/TUBB2A/CD83/GPR183/SH3BP5/S100A9/CXCL2/ATF3/SERPINE1/ARL4C/PLP2/MIR22HG/S100A8/SERPINB2/PLAUR/TNFAIP3/UPP1/PLIN2/DPYSL3/PPIF/LMNA/MARCKSL1/CD99/EMP3/GNA15/ICOSLG/ITGB5/EZR/NQO1/SLC7A5/THBD/TBX10/RHOG/SHB/TRAF1/CLIC1/HMGA1/GEM/NFKB1/DDIT4/TNFSF8/TIPARP/DNAJB5/ENC1/ZBTB43/MAPKAPK2
MODULE_53	C4_computational	395	0.430636	2.13373	9.14259e-15	2.39094e-12	3714	tags=30%, list=17%, signal=26%	TNF/CCL3/KDM5D/TMSB4Y/GPR3/LIF/GSTM1/CCL5/DUSP5/CCL4/DDX3Y/IER3/MMP9/PLAU/IGKC/SSTR2/WNT10B/CXCL2/CCL2/GFPT2/IGF2BP3/ATF3/SERPINE1/MPO/CD3E/BCL2A1/PEG10/CD69/S100A8/IL2RG/HCK/ISG15/RAB31/HAP1/CYP1B1/ANXA1/JUNB/PLIN2/S100P/CLEC2B/PRAME/FGR/NMB/FCER1G/CD79A/CD3D/RBM38/SH3BP1/ABCA1/EMP3/CORO1A/BASP1/CD33/ECE2/TNFRSF10C/MYBL2/GNA15/SLC7A5/TRPM2/LSP1/TNFRSF10D/CSTA/E2F1/CST7/ETS2/SOX4/LST1/PCLAF/CRABP…
GO_CYTOKINE_PRODUCTION	C5_GO	759	0.361528	1.88102	9.69469e-15	2.51402e-12	2806	tags=23%, list=13%, signal=21%	TNF/CCL3/CD276/IRF8/TNFRSF4/CD96/INHBA/CLECL1/THBS1/NFATC4/BCL6B/IL1RL1/HLA-G/F3/BCL3/CD83/IL23A/RELB/IL1RAP/IRF4/IL6/LILRA5/FCN1/LTA/S100A9/IL12RB1/PYHIN1/LTB/IGF2BP3/SERPINE1/CD28/ZC3H12A/CCR7/CD3E/S100A12/EPX/IL5RA/JPH4/S1PR3/FOXJ1/XCL1/SOCS1/LRRC32/CD6/S100A8/NR4A3/TWIST1/ISG15/BCL6/CLEC7A/TYROBP/TNFAIP3/CYP1B1/HAVCR2/ANXA1/TBX21/CRTAM/LEF1/PTGS2/GBP5/CSF2/STAT1/KLF2/IL36RN/SEMA7A/RIPK2/FGR/W…
GSE5542_UNTREATED_VS_IFNA_TREATED_EPITHELIAL_CELLS_6H_DN	C7_immunologic	187	-0.554229	-2.46303	1.00461e-14	2.58343e-12	4527	tags=45%, list=21%, signal=36%	TIMP2/FAM229B/PBX3/ZNF770/UBAC2/ZNF569/PRKD3/ZNF84/ZNF419/GAL3ST4/HOOK1/RBM43/N4BP2L1/ALDH5A1/PXYLP1/EFHC1/PLAG1/KIAA0040/BCKDHB/PLXDC1/OSBPL5/ALDH3A2/AASDH/SUMF1/ZKSCAN7/PCYOX1L/ZP3/CREB1/CEP41/KCNQ1/SSBP2/SLC8B1/ZFYVE16/ARMCX1/FBP1/MCEE/SNX16/IGF1R/EEA1/PLEKHG4/PIGM/RAD54B/CLUAP1/HLA-DOA/MMP28/PPFIBP1/PTGR2/NMNAT3/ATL1/SPPL2B/MANEA/ZMYND8/OR2AK2/NOG/C8orf37/GIMAP1/OSGEPL1/ATG4C/LRRN1/TOM1L2/PAF…
GO_LEUKOCYTE_CHEMOTAXIS	C5_GO	223	0.512389	2.3925	1.04968e-14	2.67702e-12	3295	tags=36%, list=15%, signal=31%	CCL3/CXCL8/CXCL1/CXCL3/CCL5/CXCL10/THBS1/CSF1/CCL4/CXCR3/GPR183/IL23A/IL6/S100A9/CXCL2/CCL2/SERPINE1/CCR7/S100A12/XCL1/S100A8/TNFSF11/IL34/ANXA1/CNR2/CXCL11/FCER1G/EDN3/VEGFA/C5AR1/CCR1/AZU1/S1PR1/DYSF/CXCL9/CORO1A/CH25H/FPR2/CCL3L3/C3AR1/CSF1R/TRPM2/CCL3L1/PGF/PDGFB/DPEP1/EDN1/ITGB2/FFAR2/DDT/PRSS56/CCL22/PDE4D/CCL19/STAP1/CALR/AKIRIN1/PLA2G7/SLIT2/ADAM8/LGALS3/PDE4B/MIF/CCL25/IL10/C1QBP/IL4/CCL…
TIAN_TNF_SIGNALING_VIA_NFKB	C2_curated	25	0.892304	2.79064	1.12768e-14	2.85239e-12	1813	tags=92%, list=8%, signal=84%	CXCL8/CXCL1/CXCL3/TNFRSF9/CD83/RELB/IL6/SDC4/CXCL2/GFPT2/NFKBIA/TNFAIP3/NFKBIE/PTGS2/GCH1/PLK2/TNFAIP2/NFKB2/ZFP36/IRF1/TRAF1/REL/NFKB1
GO_LEUKOCYTE_CELL_CELL_ADHESION	C5_GO	345	0.445185	2.16982	1.19746e-14	3.00425e-12	3556	tags=30%, list=16%, signal=26%	TNF/CD276/TNFSF9/LGALS1/CLECL1/CCL5/IL2RA/HAS2/HLA-G/ICAM1/CD70/ITGB7/CD83/LAX1/IL23A/IL6/PDCD1/S100A9/IL12RB1/SDC4/CCL2/CD177/CD28/ZC3H12A/CCR7/CD3E/FOXJ1/XCL1/SOCS1/ZAP70/LRRC32/CD6/S100A8/NR4A3/TNFSF11/BCL6/HLX/DUSP10/MAP3K8/HAVCR2/ANXA1/TBX21/CRTAM/LEF1/LCK/CD5/SHH/TNFRSF13C/RIPK2/GATA3/EGR3/PELI1/RARA/CORO1A/ADTRP/NFKBID/ICOSLG/EZR/NRARP/PLA2G2F/NLRP3/CD27/EBI3/RUNX3/NT5E/IRF1/CD160/SOX4/CEB…
GO_RESPONSE_TO_LIPID	C5_GO	884	0.34761	1.83689	1.46873e-14	3.65513e-12	3686	tags=26%, list=17%, signal=22%	TNF/CCL3/IRF8/ADM/KDM5D/ZNF703/CXCL8/CD96/CXCL1/CXCL3/INHBA/CCL5/CXCL10/THBS1/FOXA1/NFATC4/PLPP1/IL1RN/IL10RA/STAR/ICAM1/TESC/SPP1/CYP1A1/TRIB1/IL6/SSTR2/LTA/S100A9/WNT10B/CXCL2/CCL2/SERPINE1/GPBAR1/LDLR/MPO/ZC3H12A/CCR7/HPGD/GHRHR/CD6/S100A8/NR4A3/HCK/GPER1/CYP24A1/CCND1/DUSP10/NFKBIA/TNFAIP3/EFNA5/HAVCR2/ANXA1/CNR2/LEF1/LY86/CDKN1A/WNT9A/PTGS2/MSX2/CXCL11/CDKN2D/IRAK2/CRYAB/CSF2/ESRRG/IL36RN/RI…
REACTOME_INTERLEUKIN_10_SIGNALING	C2_curated	46	0.788856	2.80369	1.48308e-14	3.66132e-12	1903	tags=57%, list=9%, signal=52%	TNF/CCL3/CXCL8/CXCL1/LIF/CCL5/CXCL10/CSF1/CCL4/IL1RN/IL10RA/ICAM1/IL6/CXCL2/CCL2/TIMP1/PTGS2/CSF2/CCR1/FPR1/CCL3L3/CCL3L1/TNFRSF1B/FCER2/CCL22/CCL19
HAHTOLA_MYCOSIS_FUNGOIDES_CD4_UP	C2_curated	60	0.740963	2.7748	2.17934e-14	5.33747e-12	1213	tags=45%, list=6%, signal=43%	CCL3/ADM/CXCL8/CXCL1/CXCL3/HBEGF/CCL4/G0S2/KYNU/FBN2/IER3/TRIB1/RAB20/LILRA5/CXCL2/ATF3/PLAUR/CDKN1A/SULT1A2/PTGS2/RIPK2/RHOB/KLF6/SLC16A6/NEU1/NLRP3/ETS2
ZWANG_CLASS_3_TRANSIENTLY_INDUCED_BY_EGF	C2_curated	215	0.510931	2.38024	2.36267e-14	5.74093e-12	2159	tags=33%, list=10%, signal=30%	ADM/CXCL8/CXCL1/DUSP5/HBEGF/FOXA1/IL1RN/IER3/TRIB1/STX11/SOWAHC/BCL3/IL1RAP/IL6/CEBPD/CXCL2/HOXA1/ATF3/SERPINE1/ZC3H12A/FAM83B/MMP19/NR4A3/RGS2/MAP3K8/PLAUR/TNFAIP3/METRNL/JUNB/PTGS2/PPP1R14C/BHLHE40/PELI1/PLK2/SYT12/SLC22A13/EZR/NFKB2/CSRNP1/BIRC3/ELL2/MYADM/IRF2BPL/LINC00842/ETS2/FERMT2/EDN1/PTP4A1/VGLL3/ERVK-28/SOCS3/VSNL1/B3GNT5/MYPN/HES1/NR4A1/ITPRIP/PFKFB3/CLDN1/VMP1/ARL5B/GEM/LATS2/NFKB1/T…
GO_LEUKOCYTE_MEDIATED_IMMUNITY	C5_GO	861	0.346584	1.82968	2.78014e-14	6.70254e-12	4689	tags=29%, list=22%, signal=24%	TNF/CCL3/PTX3/CD96/PRF1/CXCL1/GPR84/SH2D1A/RETN/HLA-G/ICAM1/CD70/MMP9/BCL3/SERPINA1/CLCF1/IL23A/PLAU/IL6/NCR3/IGKC/FCN1/LTA/S100A9/IL12RB1/CD177/CD28/MPO/S100A12/EPX/PRG2/FOXJ1/XCL1/S100A8/NR4A3/SLC2A3/RAB31/BCL6/TYROBP/PLAUR/PRTN3/HAVCR2/MCEMP1/TBX21/CRTAM/S100P/CRISPLD2/ULBP2/ITGAX/MILR1/FGR/SERPINB12/GATA3/IGLV1-40/FCER1G/CYBB/C5AR1/SUSD4/ADGRE5/FCGR2A/CHI3L1/CD68/AZU1/CHIT1/TCN1/HMOX1/FCAR/FP…
GAO_LARGE_INTESTINE_ADULT_CI_MESENCHYMAL_CELLS	C8_cellSignature	339	0.445517	2.16669	2.80713e-14	6.71513e-12	2867	tags=26%, list=13%, signal=23%	TNF/TPSB2/TNFRSF4/TNFRSF18/LGALS1/CD7/CLECL1/DUSP5/ASB2/IL10RA/TPSAB1/ICAM1/ITGB7/STX11/GPR183/LAX1/IL23A/IRF4/NKG7/HCST/IL12RB1/P2RX5/LINC00309/CD3E/ADGRG5/DOK2/CD69/ZAP70/OSR2/NR4A3/SLC2A3/ODF3B/LCK/CD48/CLEC2B/GPR65/IGFLR1/TRIB2/CYBB/BMF/CD79A/WNT10A/SLAMF1/IFFO2/CD3D/PRDM1/PPP1R16B/EMP3/LY6E/CORO1A/BASP1/SLC7A5/CYTH4/LSP1/CD27/RUNX3/CST7/PLEKHO1/RGCC/CYTOR/IGF1/ITGB2/FLT3LG/ABI3/TP53INP1/VIM/…
GSE21360_SECONDARY_VS_QUATERNARY_MEMORY_CD8_TCELL_UP	C7_immunologic	180	0.53898	2.44342	2.88331e-14	6.84431e-12	2832	tags=36%, list=13%, signal=31%	TNF/CCL3/TNFSF9/CXCL3/HDC/CCL5/CCL4/DUSP2/TNFRSF9/IL1RN/IL1RL1/SLC15A3/TREM1/OASL/STX11/BCL3/IL6/HCAR2/S100A9/CXCL2/CCL2/CD69/MT2A/GADD45B/RND1/IER5/NFKBIA/MAP3K8/TNFAIP3/PTGS2/RIPK2/FPR1/BASP1/TNFAIP2/CLEC4D/NFKB2/KRT1/ZFP36/DSP/ELL2/EBI3/EDN1/NFKBIB/PTP4A1/SOCS3/FURIN/TNFRSF1B/PFKFB3/GLIPR2/IL15RA/NFKB1/SIPA1L1/PIM1/CLIC4/ADAM8/PDE4B/IL10/ALAS1/ACOD1/HIF1A/LCN2/RIOK3/FAS/SERPINB5
GSE360_CTRL_VS_L_DONOVANI_DC_DN	C7_immunologic	193	0.525299	2.39459	3.05357e-14	7.15908e-12	2084	tags=28%, list=10%, signal=26%	CCL3/ADM/CXCL8/MSC/GPR3/DUSP5/HBEGF/CCL4/G0S2/IER3/MMP9/TUBB2A/STX11/CD83/RELB/S100A10/CEBPD/POU1F1/MT2A/PTHLH/IL2RG/SLC24A5/NFKBIA/AFF2/RGL1/SEMA7A/ALAS2/GAL/FCGR2A/FCAR/EMP3/GRIP2/NFKB2/GABRP/ELL2/GADD45A/CST7/ETS2/ACOT7/CD160/CPNE6/IL3/HOXC6/SYN1/AHR/TRAF1/KLK10/FLT3LG/IL15RA/NRP2/GYPC/LYPD3/UBE2S/ADAM8/SMAD7
GO_CYTOKINE_RECEPTOR_BINDING	C5_GO	259	0.486322	2.2954	3.06231e-14	7.15908e-12	2597	tags=28%, list=12%, signal=25%	TNF/CCL3/CXCL8/TNFSF9/CXCL1/CXCL3/LIF/CCL5/CXCL10/CSF1/CCL4/IL11/IL1RN/CD70/CLCF1/IL23A/IL1RAP/IL6/LTA/IL12RB1/LTB/CXCL2/CCL2/TRAF4/XCL1/NTRK1/TNFSF11/EFNA5/IL34/CXCL11/CSF2/CNTF/STAT1/IL36RN/GATA3/VEGFA/CXCL9/CCL3L3/NGF/BDNF/CCL3L1/PGF/EBI3/SH2B3/CADM4/IL25/IL3/IFNA7/TLR9/TRAF1/IL22/DAB2IP/DDT/CCL22/LIFR/CCL19/STAP1/TGFB1/TNFSF8/SMAD7/IFNA10/PIK3R1/OSM/MIF/CCL25/NTF3/KITLG/IFNA5/IL10/CSF3/IL4/CC…
SEKI_INFLAMMATORY_RESPONSE_LPS_UP	C2_curated	75	0.691692	2.69757	3.43871e-14	7.97859e-12	1110	tags=44%, list=5%, signal=42%	CCL3/CXCL1/CXCL3/LIF/CXCL10/CSF1/SLC15A3/ICAM1/IER3/STX11/RAB20/NGFR/CCL2/ZC3H12A/EGR2/GADD45B/RND1/NFKBIA/TNFAIP3/NFKBIE/RIPK2/JDP2/GBP2/GCH1/ZMYND15/FOSL1/EGR3/PLK2/SH3PXD2B/TNFAIP2/ICOSLG/NFKB2/BIRC3
MEL18_DN.V1_UP	C6_oncogenic	140	0.573192	2.47696	3.72699e-14	8.58292e-12	2244	tags=37%, list=10%, signal=34%	ADM/TNFSF9/CXCL1/STX1A/INHBA/GPR3/LIF/HBEGF/CSF1/TNFRSF9/HAS2/TMEM51/SPP1/F3/CD83/PLXNA1/P2RX5/GFPT2/ZC3H12A/ARL4C/PTHLH/CCND1/PLAUR/FGF21/CSF2/CRISPLD2/GAL/VEGFA/FOSL1/ADGRE5/COL7A1/C3AR1/SLC16A6/SLC29A1/SLC7A5/NT5E/COL13A1/SLC2A6/EDN1/FURIN/CHST2/CLDN1/TNFAIP6/TAP1/WNT5B/TIE1/NRP2/DDIT4/BDKRB2/MEOX1/SLC22A4/ITGA3
GO_POSITIVE_REGULATION_OF_CELL_DIFFERENTIATION	C5_GO	974	0.332072	1.75827	3.84894e-14	8.7981e-12	2813	tags=22%, list=13%, signal=20%	ROR2/TNF/CCL3/ADM/ZNF703/TNFSF9/INHBA/LIF/NPPC/FOXA1/CSF1/IL2RA/FEZ1/NTN1/TNFRSF12A/HAS2/ROR1/SNAI1/HLA-G/STAR/TESC/FOXC1/FBN2/TRIB1/ETV4/CD83/CLCF1/NGFR/IL23A/S100A10/NEUROG3/IL6/CEBPD/PLXNA1/LTA/S100A9/IL12RB1/DLX2/WNT10B/PAX8/SERPINE1/ZC3H12A/SEMA6A/ADRA2B/SFRP4/EGR2/PACSIN1/FOXJ1/PHOX2B/IFITM1/SOCS1/ZAP70/NEDD9/NTRK1/TWIST1/GPER1/ISG15/RGS2/TNFSF11/BCL6/HLX/CLEC7A/HAP1/TYROBP/EPHA4/DUSP10/EFN…
GO_RESPONSE_TO_BACTERIUM	C5_GO	688	0.366645	1.89935	4.00455e-14	9.0865e-12	3706	tags=27%, list=17%, signal=23%	TNF/CCL3/IRF8/ADM/CXCL8/CD96/CXCL1/CXCL3/CCL5/CXCL10/IL10RA/JCHAIN/STAR/ICAM1/CYP1A1/TRIB1/BCL3/IL23A/IL6/IGKC/LTA/S100A9/CXCL2/CCL2/SERPINE1/MPO/ZC3H12A/CCR7/HPGD/S100A12/EPX/PRG2/CD6/S100A8/HCK/ISG15/DUSP10/NFKBIA/TNFAIP3/HAVCR2/CNR2/GPR31/LY86/CCR4/PTGS2/CXCL11/GBP5/IRAK2/CSF2/IL36RN/RIPK2/FGR/REG3G/FCER1G/PRKCA/GBP2/GCH1/C5AR1/PELI1/CD68/AZU1/CHIT1/ABCA1/CXCL9/BPI/RARA/RNASE6/FPR2/VGF/GBP7/CL…
GSE12392_IFNAR_KO_VS_IFNB_KO_CD8_NEG_SPLEEN_DC_UP	C7_immunologic	193	0.524046	2.38888	4.06339e-14	9.15272e-12	3812	tags=34%, list=18%, signal=28%	PTX3/NPPC/DUSP5/CCL4/DUSP2/TNFRSF12A/GLIS2/F3/TUBB2A/SDC4/SGK1/ATF3/ZC3H12A/CTXN1/BAG3/PLAUR/CYP1B1/PIM3/PPIF/SERTAD1/EPOP/CH25H/SLC16A6/PRNT/BIRC3/CDC42EP3/ELL2/PDGFB/LRP12/RGCC/MYPN/ID2/EIF5A/PTGER4/SHB/MAP1LC3B/ARL5B/REL/UBALD2/HIVEP1/SLC31A2/RGS1/MAFF/TAGLN2/OSGIN2/LGALS3/LINC01532/ELF4/PPTC7/SDE2/RPRM/ZBTB10/SERTAD2/EPN3/TSC22D3/ENO1/CYTIP/PHF13/NFE2L2/ZBTB21/RAB5A/EHD1/EIF1/B3GAT2/R3HDM4
GO_CELL_ACTIVATION_INVOLVED_IN_IMMUNE_RESPONSE	C5_GO	706	0.361714	1.87826	4.25636e-14	9.5179e-12	4689	tags=30%, list=22%, signal=24%	CCL3/PTX3/CXCL1/LGALS1/GPR84/RETN/ICAM1/MMP9/BCL3/SERPINA1/CLCF1/GPR183/IL23A/RELB/IRF4/PLAU/IL6/FCN1/S100A9/IL12RB1/CD177/LFNG/CD28/MPO/ZC3H12A/S100A12/EPX/PRG2/S100A8/NR4A3/SLC2A3/RAB31/BCL6/HLX/TYROBP/PLAUR/PRTN3/HAVCR2/MCEMP1/ANXA1/TBX21/LEF1/S100P/CRISPLD2/ITGAX/MILR1/RIPK2/FGR/SERPINB12/GATA3/FCER1G/CYBB/C5AR1/ADGRE5/FCGR2A/CHI3L1/CD68/AZU1/SLAMF1/CHIT1/TCN1/HMOX1/FCAR/FPR1/DYSF/ZNF683/BPI/…
GSE9006_TYPE_1_DIABETES_AT_DX_VS_4MONTH_POST_DX_PBMC_UP	C7_immunologic	196	0.527159	2.41453	4.32414e-14	9.5999e-12	5840	tags=48%, list=27%, signal=36%	ADM/PTX3/DUSP5/HBEGF/MARCKS/G0S2/TREM1/TRIB1/STX11/CD83/SGK1/AQP9/CXCL2/SOCS1/APOBEC3A/SLC2A3/BCL6/NFKBIA/TNFAIP3/JUNB/UPP1/S100P/PPIF/MAFB/SAT1/BHLHE40/CYBB/EGR3/AZU1/AREG/SFN/FCAR/FPR1/IER2/FPR2/NFKB2/ZFP36/COTL1/SOCS3/PLK3/PFKFB3/RNF19B/HP/FFAR2/ADNP2/NFIL3/DDIT4/RGS1/CDT1/HERPUD1/ZFP36L1/MAPK6/HSPA5/VASP/ALDOA/CKAP4/TSC22D3/MAPRE1/DHCR7/HMGB2/TYMP/P4HB/NAMPT/PPP4C/PIGA/PDIA3/RBM3/QSOX1/APOBR/…
SMID_BREAST_CANCER_LUMINAL_B_DN	C2_curated	559	0.386473	1.97517	4.43432e-14	9.7742e-12	3337	tags=32%, list=15%, signal=28%	ADM/PTX3/TNFRSF4/CXCL8/CD96/CXCL1/CD7/CCL5/CXCL10/SH2D1A/JCHAIN/KYNU/HLA-G/TNNI2/ICAM1/FOXC1/ITGB7/IL21R/GPR183/IL6/NKG7/PDE9A/IGKC/S100A9/FBLN2/P2RX5/LTB/CXCL2/CCL2/IGF2BP3/ARL4C/TRAT1/CCR7/SFRP4/BCL2A1/CD69/XCL1/ZAP70/DLK1/S100A8/IL2RG/SLC2A3/RGS2/CHAC1/RRAS2/TNFAIP3/CYP1B1/ANXA1/LCK/ACTG2/CD48/TMEM158/PTGS2/CXCL11/CRYAB/EFEMP1/PAMR1/GAL/KCNK5/GBP1/CSGALNACT1/SAT1/CHST7/CD79A/CHI3L1/PELI1/UGT8/…
GO_GRANULOCYTE_CHEMOTAXIS	C5_GO	122	0.596966	2.55431	4.4773e-14	9.79894e-12	3074	tags=40%, list=14%, signal=35%	CCL3/CXCL8/CXCL1/CXCL3/CCL5/CXCL10/THBS1/CSF1/CCL4/IL23A/S100A9/CXCL2/CCL2/CCR7/S100A12/XCL1/S100A8/IL34/ANXA1/CXCL11/FCER1G/EDN3/C5AR1/DYSF/CXCL9/CCL3L3/C3AR1/CSF1R/CCL3L1/DPEP1/EDN1/ITGB2/CCL22/PDE4D/CCL19/AKIRIN1/SLIT2/LGALS3/PDE4B/CCL25/C1QBP/IL4/CCL18/DAPK2/RARRES2/CKLF/CCL15/CAMK1D/CXCL17
GO_POSITIVE_REGULATION_OF_RESPONSE_TO_EXTERNAL_STIMULUS	C5_GO	501	0.399388	2.01754	5.02653e-14	1.09235e-11	3321	tags=28%, list=15%, signal=24%	TNF/CCL3/CXCL8/CCL5/CXCL10/THBS1/CSF1/CCL4/SH2D1A/IL1RL1/HLA-G/F3/IL23A/RELB/IL6/NCR3/LILRA5/FCN1/LTA/S100A9/PYHIN1/SERPINE1/LDLR/CD28/CCR7/S100A12/XCL1/CD6/S100A8/HCK/F12/TNFSF11/CLEC7A/NFKBIA/IL34/HAVCR2/CRTAM/LY86/CCR4/PTGS2/GBP5/CNTF/MUC4/RIPK2/FCER1G/PRKCA/EDN3/VEGFA/C5AR1/CCR1/AZU1/S1PR1/DYSF/GHRL/FPR2/C3AR1/CSF1R/PSMA8/CLEC4D/PGF/THBD/PDGFB/CD160/EDN1/NECTIN2/CEBPB/TLR7/MATR3/PLA2G2A/MUC12…
GO_POSITIVE_REGULATION_OF_LYMPHOCYTE_ACTIVATION	C5_GO	334	0.449088	2.18231	5.28396e-14	1.14026e-11	3556	tags=29%, list=16%, signal=25%	CD276/TNFRSF4/TNFSF9/LGALS1/CLECL1/CCL5/IL2RA/HLA-G/CD70/CD83/CLCF1/GPR183/IL23A/IL6/PDCD1/IGKC/IL12RB1/CCL2/CD28/CCR7/CD3E/XCL1/SOCS1/ZAP70/CD6/TNFSF11/BCL6/HLX/CLEC7A/TYROBP/DUSP10/MAP3K8/HAVCR2/ANXA1/TBX21/LEF1/LCK/CDKN1A/CD5/SHH/TNFRSF13C/RIPK2/GATA3/EGR3/PELI1/RARA/CORO1A/NFKBID/ICOSLG/TRBC2/AXL/CHRNB2/NLRP3/CD27/EBI3/RUNX3/CD160/SOX4/TRDC/ICOS/HES1/IGF1/TLR9/FCRL3/FLT3LG/VTCN1/LILRB4/CCL19/…
VERHAAK_AML_WITH_NPM1_MUTATED_UP	C2_curated	178	0.538143	2.43592	6.57637e-14	1.40931e-11	1252	tags=33%, list=6%, signal=31%	TNF/CCL3/PTX3/CXCL3/COL4A5/CXCL10/THBS1/HCAR3/CCL4/MARCKS/G0S2/SLC15A3/TREM1/FOXC1/IER3/TRIB1/SERPINA1/IL6/LILRA5/FCN1/AQP9/CXCL2/BCL2A1/NINJ1/APOBEC3A/LGALS3BP/HCK/BCL6/SERPINB2/NFKBIA/PLAUR/TNFAIP3/CYP1B1/LMNA/FGR/MAFB/KCNK5/KCNJ2/SAT1/GCH1/C5AR1/FCGR2A/CCR1/PELI1/IFI30/CAMK1/HMOX1/FPR1/BASP1/C3AR1/LTBP1/TNFAIP2/NFKB2/LILRB3/LILRA1/ETS2/SLC2A6/FCGR3A
GO_REGULATION_OF_LEUKOCYTE_DIFFERENTIATION	C5_GO	281	0.472162	2.24884	6.92532e-14	1.47385e-11	2891	tags=29%, list=13%, signal=26%	ROR2/TNF/CCL3/TNFRSF18/TNFSF9/INHBA/LIF/CSF1/IL2RA/TCF7/HLA-G/TESC/TRIB1/CD83/IL23A/IRF4/IL12RB1/CD28/ZC3H12A/FOXJ1/SOCS1/ZAP70/TNFSF11/BCL6/HLX/TYROBP/DUSP10/IL34/ANXA1/TBX21/CRTAM/LEF1/SHH/RIPK2/MAFB/GATA3/PRKCA/CCR1/EGR3/PRDM1/ZNF683/RARA/NFKBID/LILRB3/NRARP/AXL/NLRP3/CD27/RUNX3/IRF1/SOX4/CEBPB/ID2/TLR9/PGLYRP1/FCRL3/FLT3LG/SPINK5/LILRB4/CCL19/TGFB1/ADAM8/SMAD7/ZFP36L1/HLA-B/CARTPT/IRF7/FOXN1/…
BENPORATH_EED_TARGETS	C2_curated	995	0.330581	1.75367	7.27441e-14	1.53754e-11	3385	tags=28%, list=16%, signal=25%	ADM/MSC/EGR4/WT1/WT1-AS/COL4A5/NPPC/NRIP3/EPS8/HIC1/FEZ1/NTN1/HLA-G/FOXC1/CD70/FBN2/SLC30A2/SPAG6/NEUROG3/TRH/CEBPD/SSTR2/DLX2/P2RX5/WNT10B/FZD8/WNT1/PROK2/HOXA1/PAX8/ATF3/ADAMTS15/SDC2/GADD45G/DUSP4/GALNT18/SFRP4/FOXJ1/PHOX2B/RASL10A/HPCAL4/DLK1/PTHLH/NTRK1/NR4A3/TWIST1/BHLHE41/CYP24A1/GREB1L/HLX/HAP1/HBA2/NEUROG2/CYP1B1/TBX21/ADRB1/AFF2/METRNL/SORCS3/RTN4RL2/PDE10A/MSX2/SHH/GABRA2/ULBP2/TRPC5/P…
STK33_UP	C6_oncogenic	268	0.471016	2.23844	9.41916e-14	1.97732e-11	2159	tags=28%, list=10%, signal=25%	TNF/DUSP8/ADM/CXCL1/CXCL3/DUSP5/HBEGF/PHLDA1/ASB2/CCL4/IL10RA/KYNU/TFPI2/ICAM1/TREM1/TRIB1/BCL3/PLAU/CREB5/SGK1/AQP9/CXCL2/LFNG/EGR2/BCL2A1/SIPA1L2/MIR22HG/RGS2/BCL6/TYROBP/KBTBD8/HAVCR2/ANXA1/JUNB/CDKN1A/UPP1/CLEC2B/MILR1/GPR65/MAFB/KCNJ2/BMF/C5AR1/EGR3/PELI1/RHOB/HMOX1/ABCA1/KLF6/CSRNP1/ZFP36/THBD/ATP2B1-AS1/MPEG1/NCF2/C15orf48/RNF19B/CLDN1/MIDN/ARRDC3/ARL5B/COL6A3/CMTM3/TP53INP1/CFL2/RGS1/BTG2…
GSE36888_UNTREATED_VS_IL2_TREATED_TCELL_17H_DN	C7_immunologic	194	0.520859	2.37682	1.00472e-13	2.09492e-11	3656	tags=38%, list=17%, signal=32%	ADM/PTX3/CXCL1/STX1A/CXCL3/CCL4/TNFRSF9/G0S2/KYNU/ICAM1/TREM1/TUBB2A/SERPINA1/HAS1/IL6/CXCL2/ZC3H12A/S100A12/BCL2A1/PLP2/SOCS1/MT2A/HCK/ASPHD2/BCL6/HLX/IER5/PLAUR/TNFAIP3/PTGS2/CDKN2D/CYB5R2/FCER1G/GCH1/FCAR/CASP5/FPR2/SH3PXD2B/SLC16A6/GNA15/NFKB2/FERMT2/MFSD2A/C15orf48/PFKFB3/TRAF1/TNFAIP6/CLIC1/IL15RA/MET/DDIT4/ALOX5AP/GLIS3/MT1E/ETV5/DENND3/LILRB1/TLR2/MIR3945HG/CKAP4/ST20-AS1/WNT5A/TUBB3/SLC7…
GO_CELL_CHEMOTAXIS	C5_GO	291	0.46236	2.20902	1.04825e-13	2.171e-11	3543	tags=35%, list=16%, signal=30%	CCL3/CXCL8/CXCL1/CXCL3/CCL5/CXCL10/THBS1/HBEGF/CSF1/CCL4/CXCR3/GPR183/IL23A/IL6/S100A9/CXCL2/CCL2/PLEKHG5/SERPINE1/CCR7/S100A12/XCL1/S100A8/TNFSF11/IL34/ANXA1/CNR2/LEF1/CCR4/CXCL11/FCER1G/EDN3/VEGFA/C5AR1/HOXB9/CCR1/EGR3/AZU1/S1PR1/DYSF/CXCL9/CORO1A/CH25H/FPR2/CCL3L3/C3AR1/CSF1R/TRPM2/CCL3L1/PGF/PDGFB/DPEP1/CCR9/EDN1/RHOG/NR4A1/FGFR1/ITGB2/TMSB4X/MET/FFAR2/DDT/PRSS56/CCL22/PDE4D/CCL19/STAP1/CALR/…
GSE360_L_DONOVANI_VS_B_MALAYI_HIGH_DOSE_DC_UP	C7_immunologic	193	0.518734	2.36466	1.11697e-13	2.29791e-11	2273	tags=32%, list=10%, signal=29%	CCL3/ADM/CXCL8/MSC/GPR3/DUSP5/HBEGF/CCL4/IL1RN/G0S2/IER3/MMP9/STX11/GPR183/IRF4/AQP9/CNN3/GADD45G/BCL2A1/MT2A/NINJ1/GADD45B/ISG15/SLC2A3/TIMP1/NFKBIA/TNFAIP3/AFF2/PLIN2/VEGFA/FCGR2A/CHI3L1/MARCKSL1/SYCP1/KLF6/BASP1/NLRP3/CST7/ETS2/CYP4B1/FSCN1/IFI6/IL3/PLK3/SYN1/MT1G/AHR/CHST2/RNF19B/TRAF1/HTR7/IL15RA/NFKB1/DDIT4/PKLR/ACKR1/LILRB4/ZFP36L1/IRF7/USH2A/PLK1
DURANTE_ADULT_OLFACTORY_NEUROEPITHELIUM_NK_CELLS	C8_cellSignature	82	0.658201	2.61123	1.20766e-13	2.46803e-11	3975	tags=56%, list=18%, signal=46%	CCL3/PRF1/CD7/CCL5/CCL4/DUSP2/IL2RB/NKG7/HCST/PYHIN1/ARL4C/DOK2/CD69/IL2RG/TYROBP/CD48/GPR65/FCER1G/EMP3/CORO1A/LSP1/CST7/FCGR3A/CD160/EFHD2/TRDC/CCL4L2/IFITM2/SH3BGRL3/ITGB2/TMSB4X/PTGDS/GZMB/HLA-B/CYBA/HLA-A/CTSW/CD52/PFN1/MYO1F/LCP1/GZMM/SPON2/UCP2/XCL2/LIMD2
GSE25123_WT_VS_PPARG_KO_MACROPHAGE_UP	C7_immunologic	192	0.518799	2.36183	1.30578e-13	2.65099e-11	2764	tags=31%, list=13%, signal=27%	ADM/PTX3/TNFSF9/CXCL3/THBS1/MARCKS/RETN/UPB1/OASL/PLAU/IL6/CEBPD/AQP9/CXCL2/PROK2/S100A8/APOBEC3A/RGS2/BCL6/MAP3K8/TNFAIP3/CD48/MAFB/VEGFA/BMF/CHST7/FCGR2A/RHOV/CHI3L1/SLAMF1/FPR1/ABCA1/GHRL/CASP5/FPR2/HSPA6/GPR132/MFSD2A/CEMIP/MT1H/SOCS3/IFI6/PIM2/PTGER4/MT1G/C15orf48/IFITM2/PFKFB3/SGTB/FOSL2/ADAMDEC1/ZFP36L1/ATP2B1/ETV5/OSM/ACOD1/CNN2/LCN2/ORM1
HU_FETAL_RETINA_MICROGLIA	C8_cellSignature	368	0.427558	2.09713	1.57283e-13	3.17229e-11	4654	tags=36%, list=21%, signal=29%	IRF8/CXCL8/IL10RA/SPP1/CD83/GPR183/OLFML3/CEBPD/HCST/SGK1/ACY3/ATF3/NINJ1/BHLHE41/HCK/GADD45B/SLC2A3/RGS2/RAB31/C12orf75/CLEC7A/IER5/TYROBP/BAG3/NFKBIA/PLAUR/HAVCR2/LY86/JUNB/CDKN1A/LPAR5/KLF2/ITGAX/MILR1/HPGDS/FCER1G/SAT1/CYBB/FCGR2A/CCR1/RHOB/HMOX1/FPR1/KLF6/CORO1A/RNASE6/CCL3L3/C3AR1/CSF1R/SLC29A1/CYTH4/LSP1/ZFP36/ETS2/UBC/FCGR3A/SH2B3/EFHD2/CEBPB/LST1/PLEKHO1/RHOG/COTL1/MPEG1/TNFRSF1B/B3GNT5/…
GSE13484_UNSTIM_VS_YF17D_VACCINE_STIM_PBMC_DN	C7_immunologic	196	0.51888	2.37661	1.70818e-13	3.4229e-11	2566	tags=30%, list=12%, signal=27%	TNF/INHBA/DUSP5/HBEGF/CCL4/IL2RA/CCNA1/IL1RN/UPB1/SPP1/OASL/SOWAHC/IL6/LTA/ATF3/IFITM1/SOCS1/MT2A/LGALS3BP/GADD45B/ISG15/BCL6/HLX/DNAAF1/STAT1/RIPK2/GBP1/KCNJ2/OLIG2/CACNA1A/BCL2L14/LY6E/CH25H/CASP5/ADTRP/IRS1/ETS2/SLC2A6/IRF1/IFIT3/MT1H/SOCS3/IFI6/MT1G/TRAF1/TNFAIP6/TAP1/IFIT2/IL15RA/FFAR2/STAP1/UBE2S/MT1E/IRF7/ISG20/ZBP1/IL12RB2/IL17A/SLC30A3
GSE29618_PDC_VS_MDC_DAY7_FLU_VACCINE_DN	C7_immunologic	194	0.518852	2.36766	1.72655e-13	3.43738e-11	2166	tags=32%, list=10%, signal=29%	LGALS1/IL1RN/MARCKS/GAS7/ITGB7/SERPINA1/S100A10/CEBPD/FCN1/SGK1/PDLIM1/DOK2/HCK/SLC2A3/RAB31/TIMP1/BCL6/CLEC7A/TST/ANXA1/LY86/ITGAX/PPIF/LMNA/FGR/SAT1/FCGR2A/IFI30/EMP3/BASP1/CD33/TNFAIP2/CSF1R/DHRS3/CSTA/NLRP3/CST7/CD1B/EFHD2/CEBPB/LST1/RHOG/COL9A2/RGCC/COTL1/ANXA2/ID2/NCF2/PTGER4/AHR/IFITM2/ITGB2/TPI1/RGS10/MTHFD2/CD1E/ADAM8/MNDA/LGALS3/TUBA4A/ZFP36L1/ATP2B1
DURANTE_ADULT_OLFACTORY_NEUROEPITHELIUM_MAST_CELLS	C8_cellSignature	72	0.687284	2.65654	1.82773e-13	3.61551e-11	1110	tags=42%, list=5%, signal=40%	TPSB2/HDC/LIF/CSF1/CCL4/DUSP2/TPSAB1/IL1RL1/CD83/SGK1/CCL2/HPGD/CD69/SOCS1/NR4A3/RGS2/TYROBP/NFKBIA/PLAUR/TNFAIP3/PLIN2/PTGS2/GPR65/HPGDS/FCER1G/EGR3/AREG/EMP3/IER2/BIRC3
WP_GENES_RELATED_TO_PRIMARY_CILIUM_DEVELOPMENT_BASED_ON_CRISPR	C2_curated	99	-0.64194	-2.59293	2.02004e-13	3.97048e-11	5412	tags=67%, list=25%, signal=50%	IFT140/CEP104/IFT74/TRAF3IP1/SASS6/CEP120/OFD1/TCTN2/CEP192/WDPCP/TTBK2/BBS4/TUBE1/BBS1/TTC21B/FGFR1OP/CEP295/ARMC9/DYNC2LI1/C2CD3/TTC8/TRAPPC11/PIBF1/TTC30B/BBS9/CEP83/TMEM67/TMEM231/IFT80/IFT46/IFT172/KIF3A/TXNDC15/KIAA0753/EFCAB7/RPGRIP1L/ARL13B/MKKS/TULP3/DYNC2H1/WDR19/TCTEX1D2/CEP162/WDR35/CLUAP1/BBS5/BBS2/MKS1/IFT27/ARL6/IFT43/CEP19/FBF1/RABL2A/BBS7/ICK/TUBD1/BBS12/RAB23/FAM92A/TTC23/BBS10/…
GO_POSITIVE_REGULATION_OF_CELL_POPULATION_PROLIFERATION	C5_GO	898	0.339675	1.79575	2.25112e-13	4.39666e-11	2653	tags=21%, list=12%, signal=19%	TNF/CD276/ADM/TNFRSF4/ZNF703/TNFSF9/EGR4/LIF/CLECL1/CCL5/CXCL10/THBS1/HBEGF/CSF1/PDGFA/IL11/IL2RA/NTN1/HAS2/CD70/F3/MMP9/CLCF1/GPR183/NGFR/IL23A/IL6/LTA/IL12RB1/WNT10B/WNT1/CD248/PROK2/ATF3/GPBAR1/CD28/POU1F1/CD3E/HPGD/IL5RA/GHRHR/S1PR3/XCL1/ZAP70/CD6/PTHLH/OSR2/NR4A3/TWIST1/HCK/GPER1/TIMP1/BCL6/HLX/CLEC7A/CCND1/ERBB3/TNFAIP3/PRTN3/IL34/HAVCR2/ANXA1/LEF1/CDKN1A/PTGS2/PRAME/SHH/TNFRSF13C/SOX8/FGF2…
GSE30971_CTRL_VS_LPS_STIM_MACROPHAGE_WBP7_HET_2H_UP	C7_immunologic	188	0.517074	2.35712	2.5908e-13	5.01845e-11	2739	tags=32%, list=13%, signal=29%	TNF/CXCL8/NRIP3/HBEGF/CCL4/PHLDA2/TNFRSF9/G0S2/TREM1/UPB1/F3/IER3/SOWAHC/IL1RAP/PLAU/IL6/SH3BP5/CXCL2/ZC3H12A/BCL2A1/S1PR3/NEDD9/IL2RG/SLC2A3/IER5/SERPINB2/CCND1/NFKBIA/PLAUR/MCEMP1/UPP1/PTGS2/OLIG1/KCNJ2/OLIG2/PRR16/ABCA1/FPR2/SH3PXD2B/CSTA/MIR3142HG/CDC42EP3/ETS2/MFSD2A/SOCS3/PFKFB3/TNFAIP6/MAP1LC3B/MET/NFKB1/TMCC3/CLIC4/OSGIN2/PDE4B/OSM/DENND3/TMEFF1/SLC1A2/MIR3945HG/ZBTB10/LINC01192
GSE36891_UNSTIM_VS_POLYIC_TLR3_STIM_PERITONEAL_MACROPHAGE_UP	C7_immunologic	145	0.556592	2.4248	2.602e-13	5.01845e-11	2122	tags=39%, list=10%, signal=36%	DUSP8/CXCL1/WT1/LIF/DUSP5/PHLDA1/PMAIP1/IER3/SOWAHC/NGFR/IL6/CEBPD/SDC4/CXCL2/CCL2/PBX4/ATF3/RASD1/SERPINE1/DUSP4/EGR2/PEG10/NR4A3/TNFAIP3/PTGS2/WNT11/SPRY2/EGR3/PLK2/AREG/SPRY1/IER2/TNFAIP2/NGF/KCNJ1/ZFP36/GPR132/RND2/EDN1/CEBPB/STRA8/PLA2G2A/NR4A1/ARL4D/PLK3/HOMER1/TNFAIP6/REL/NFIL3/DOK7/HES2/BTG2/TMCC3/DNAJB4/MAFF/FOSL2/ENC1
GO_IMMUNE_SYSTEM_DEVELOPMENT	C5_GO	968	0.326961	1.72959	2.6213e-13	5.02426e-11	3211	tags=21%, list=15%, signal=19%	ROR2/TNF/CCL3/IRF8/TNFRSF18/TNFSF9/LGALS1/INHBA/LIF/THBS1/CSF1/IL11/IL2RA/TCF7/HLA-G/TESC/FOXC1/TRIB1/MMP9/BCL3/CD83/CLCF1/GPR183/IL23A/RELB/IRF4/IL6/PDCD1/CEBPD/LTA/IL12RB1/WNT10B/FZD8/LTB/WNT1/CD248/LFNG/CD28/ZC3H12A/POU1F1/CCR7/CD3E/FOXJ1/SOCS1/ZAP70/NTRK1/NR4A3/ISG15/TNFSF11/BCL6/HLX/TYROBP/DUSP10/NFKBIA/TNFAIP3/PRTN3/IL34/HAVCR2/ANXA1/TBX21/CRTAM/LEF1/LCK/JUNB/CCR4/SHH/CSF2/STAT1/KLF2/RIPK2/…
GO_REGULATION_OF_CELL_CELL_ADHESION	C5_GO	420	0.412966	2.05486	2.64803e-13	5.04418e-11	2432	tags=24%, list=11%, signal=22%	TNF/CD276/ZNF703/TNFSF9/LGALS1/CLECL1/CCL5/FOXA1/IL2RA/IL1RN/HAS2/HLA-G/ICAM1/CD70/CD83/LAX1/IL23A/IL6/PDCD1/IL12RB1/SDC4/WNT1/CCL2/CD28/ZC3H12A/CCR7/CD3E/FOXJ1/XCL1/SOCS1/ZAP70/LRRC32/CD6/NR4A3/TNFSF11/BCL6/HLX/DUSP10/MAP3K8/PLAUR/EFNA5/HAVCR2/ANXA1/TBX21/CRTAM/LEF1/LCK/CD5/SHH/TNFRSF13C/RIPK2/GATA3/PRKCA/VEGFA/EGR3/PELI1/RARA/CORO1A/ADTRP/NFKBID/ICOSLG/NRARP/PLA2G2F/APOA1/NLRP3/FOXA2/CD27/MYADM…
ZHOU_INFLAMMATORY_RESPONSE_LPS_UP	C2_curated	383	0.426494	2.09812	2.8257e-13	5.3496e-11	3305	tags=31%, list=15%, signal=26%	TNF/IRF8/ADM/PTX3/NIPAL4/TNFSF9/CXCL1/CXCL3/TPSD1/CXCL10/DUSP5/GPR84/CCL4/DDX3Y/MARCKS/G0S2/ADORA2A-AS1/SNAI1/ICAM1/UPB1/IER3/OASL/IL23A/RELB/IL6/CREB5/SSTR2/CYP2F1/SDC4/CXCL2/SERPINE1/ZC3H12A/SEMA6A/GHRHR/SOCS1/NINJ1/OSR2/SLC28A1/ISG15/SERPINB2/NPAS3/PLAUR/WNK4/LEF1/PTGS2/SHD/IRAK2/SLC26A9/ST7-AS1/FOSL1/RPE65/GRIA1/FCAR/CADPS/SPON1/CXCL9/NOX4/MAP2K3/CH25H/MXRA5/TNFAIP2/NFKB2/CSRNP1/MIR3142HG/ATP…
GSE7219_UNSTIM_VS_LPS_AND_ANTI_CD40_STIM_NIK_NFKB2_KO_DC_DN	C7_immunologic	186	0.521455	2.37441	2.9227e-13	5.49948e-11	4061	tags=41%, list=19%, signal=34%	TNF/RRAD/CXCL10/PHLDA1/CCL4/DUSP2/IL2RA/ICAM1/TRIB1/IL21R/IRF4/PDCD1/ATF3/TRAF4/NEDD9/NR4A3/LGALS3BP/GADD45B/RGS2/IER5/BAG3/NFKBIA/ADAP1/NFKBIE/CDKN1A/HPGDS/BHLHE40/CBX4/RHOB/DOCK9/PPP1R16B/SPRY1/LY6E/SLC16A6/SLC7A5/ZFP36/ETS2/UBC/TIGIT/TLCD1/TNFRSF1B/ICOS/PTGER4/IFITM2/ARRDC3/SLC3A2/NFIL3/SIPA1L1/RGS1/RGS10/BTG2/UBE2S/CLIC4/HERPUD1/ADAM8/FOSL2/ZFP36L1/PDE4B/ISG20/ITM2C/ITK/HIF1A/SLC39A4/ITGAE/DN…
LAKE_ADULT_KIDNEY_C3_PROXIMAL_TUBULE_EPITHELIAL_CELLS_S1_S2	C8_cellSignature	211	-0.515801	-2.32528	3.07355e-13	5.74829e-11	3397	tags=38%, list=16%, signal=32%	DPH6/PTPRG/CHD9/TTC28/COMMD10/MAP3K13/SUMF1/PDE8A/KCNQ1OT1/DANT2/VPS13A/TNRC6B/ANKRD26/SCAPER/SIK2/DIP2C/HIBCH/MAST4/EHBP1/SUGCT/PATJ/PPP1R21/PCSK5/IGF1R/PPARA/CUBN/SLC2A9/FRMD3/PPFIBP1/CALD1/ZBTB38/RAB11FIP3/ZBTB20/RNF152/TLN2/ANK3/NHS/FGD4/PCLO/ENOSF1/PTH2R/DLG2/FTX/AFDN/PTPRD/LRP2/LINC01515/ARHGAP6/TNS1/ARHGEF28/COL4A1/PTPRJ/NRP1/ENPEP/GPHN/WDR72/P3H2/KANSL1L/MME/PLEKHA7/L3MBTL4/RORA/PRUNE2/NF…
GSE42021_CD24HI_TREG_VS_CD24HI_TCONV_THYMUS_DN	C7_immunologic	197	0.511515	2.34646	3.15496e-13	5.865e-11	1632	tags=24%, list=8%, signal=23%	ZNF703/TNFSF9/CXCL3/CXCL10/PHLDA1/PDGFA/DDX3Y/DUSP2/IL1RN/ICAM1/IER3/CD83/RELB/LTA/FBLN2/SGK1/CXCL2/SERPINE1/GADD45G/EGR2/MT2A/GADD45B/COL6A1/LHX9/MYL4/SERPINB2/NFKBIA/MAP3K8/PLAUR/JUNB/CDKN1A/UPP1/PTGS2/BHLHE40/F2RL3/PELI1/HMOX1/CXCL9/IER2/CDKN2B/CH25H/BIRC3/ETS2/IRF1/SOCS3/NR4A1/ITM2A/MIDN
GO_CELLULAR_RESPONSE_TO_BIOTIC_STIMULUS	C5_GO	232	0.488007	2.27429	3.18198e-13	5.87981e-11	3681	tags=34%, list=17%, signal=29%	TNF/CCL3/IRF8/CXCL8/CXCL1/CXCL3/CCL5/CXCL10/STAR/ICAM1/TRIB1/IL6/CXCL2/CCL2/SERPINE1/ZC3H12A/CD6/HCK/CLEC7A/NFKBIA/TNFAIP3/HAVCR2/LY86/CXCL11/IRAK2/CSF2/IL36RN/RIPK2/PRKCA/CD68/ABCA1/CXCL9/BPI/RARA/AXL/ZFP36/NLRP3/TICAM2/CEBPB/NFKBIB/TNFRSF1B/CARD17/IRGM/TIGAR/DAB2IP/NFKB1/PDE4D/VIM/IGFBPL1/STAP1/DDIT3/TGFB1/ANKRD1/PDE4B/MIF/BCL2L11/LY96/IL10/CSF3/ACOD1/CMPK2/LILRB1/HSPA5/TLR2/LCN2/TICAM1/RHOA/PP…
GO_CELL_SURFACE	C5_GO	873	0.337609	1.78247	3.25273e-13	5.97476e-11	3343	tags=27%, list=15%, signal=24%	ROR2/TNF/CD276/TNFRSF4/TNFRSF18/LGALS1/CXCL10/THBS1/HBEGF/PDGFA/IL2RA/TNFRSF9/TNFRSF12A/CXCR3/ROR1/ADGRA2/IL1RL1/HLA-G/ICAM1/F3/ITGB7/CD83/ECE1/NGFR/IL2RB/PLAU/PDCD1/LILRA5/IGKC/FCN1/HCST/IL12RB1/HSPA2/SDC4/WNT1/CD248/ADAMTS15/SDC2/LDLR/CD28/CCR7/CD3E/ADRA2B/IL5RA/SFRP4/GHRHR/CD69/LRRC32/CD6/KCNH2/ASIC1/NTRK1/ACHE/IL2RG/CLEC7A/TYROBP/EPHA4/PLAUR/EFNA5/HAVCR2/ANXA1/RTN4RL2/CCR4/CD5/CLEC2B/SHH/TNFR…
PHONG_TNF_RESPONSE_NOT_VIA_P38	C2_curated	331	0.443556	2.15036	3.2731e-13	5.9766e-11	2759	tags=30%, list=13%, signal=27%	DUSP8/CXCL10/CSF1/PHLDA2/TNFRSF9/G0S2/HLA-G/ICAM1/CD70/CYP1A1/TRIB1/MMP9/TUBB2A/BCL3/CD83/ECE1/COL6A2/RELB/MDFI/PLAU/SSTR2/PLXNA1/LTB/SDC4/SGK1/PDE4A/GFPT2/SERPINE1/LDLR/BCL2A1/PEG10/OSR2/BHLHE41/COL6A1/STRA6/IER5/N4BP3/NFKBIA/PLAUR/TMEM158/PDE10A/CSF2/PPIF/RIPK2/GBP1/BHLHE40/GBP2/GCH1/ADGRE5/PELI1/GPRC5A/ABCA1/KLF6/IER2/MAP2K3/PDLIM4/TNFAIP2/NFKB2/BIRC3/CDC42EP3/GADD45A/ETS2/SLC2A6/IRF1/SOX4/EFH…
GSE27434_WT_VS_DNMT1_KO_TREG_DN	C7_immunologic	198	0.508827	2.33336	3.60419e-13	6.54244e-11	2520	tags=28%, list=12%, signal=25%	TNF/ZNF703/TNFSF9/CXCL3/INHBA/PHLDA1/PDGFA/DDX3Y/DUSP2/IL1RN/IL1RL1/ICAM1/CD83/RELB/COL1A2/FBLN2/SGK1/CXCL2/SERPINE1/EGR2/GADD45B/COL6A1/MYL4/SERPINB2/NFKBIA/MAP3K8/PLAUR/JUNB/CDKN1A/PTGS2/SERTAD1/BHLHE40/PELI1/RHOB/PRDM1/MARCKSL1/CXCL9/IER2/TNFAIP2/CLEC4D/BIRC3/ZFP36/ETS2/IRF1/SOCS3/NR4A1/MIDN/PAG1/BTG2/PIM1/ZFP36L1/AK1/IL10/ATF4/ACOD1
GO_POSITIVE_REGULATION_OF_LEUKOCYTE_CELL_CELL_ADHESION	C5_GO	230	0.487192	2.27443	3.98162e-13	7.18531e-11	1903	tags=25%, list=9%, signal=23%	TNF/CD276/TNFSF9/LGALS1/CLECL1/CCL5/IL2RA/HAS2/HLA-G/ICAM1/CD70/CD83/IL23A/IL6/PDCD1/IL12RB1/CCL2/CD28/CCR7/CD3E/XCL1/SOCS1/ZAP70/CD6/NR4A3/TNFSF11/BCL6/HLX/DUSP10/MAP3K8/HAVCR2/ANXA1/LEF1/LCK/CD5/SHH/TNFRSF13C/RIPK2/GATA3/EGR3/RARA/CORO1A/NFKBID/ICOSLG/NLRP3/CD27/EBI3/RUNX3/CD160/SOX4/ICOS/HES1/IGF1/ITGB2/VTCN1/LILRB4/CCL19
KUROZUMI_RESPONSE_TO_ONCOCYTIC_VIRUS	C2_curated	45	0.769415	2.72953	4.05153e-13	7.25644e-11	1424	tags=49%, list=7%, signal=46%	TNF/CCL3/CCL5/CXCL10/IL11/IL10RA/CXCR3/SPP1/IL2RB/LTA/LTB/CXCL2/CCL2/CCR7/IL2RG/CCR4/IL36RN/CCR1/CXCL9/ITGAD/CCR9/TNFRSF1B
RICKMAN_METASTASIS_UP	C2_curated	334	-0.452141	-2.14073	4.06806e-13	7.25644e-11	4977	tags=40%, list=23%, signal=31%	GGT7/PDZD11/VPS45/DYRK4/ZBTB33/HSD17B12/PMS2/GPRC5B/ZBTB14/AKAP1/ABCD4/ERVK3-1/FAM229B/PARL/TTC5/NUP107/CDK5RAP3/SCFD2/DDR2/ELP2/ACVR2A/TMLHE/DIS3L2/DTX3/OSCP1/TMEM18/FASTKD2/TTLL5/THOC2/MSH5/NBR1/WDR12/TTC17/USP13/ARMCX3/AHI1/GATC/ATXN3/MAGI2/RPE/PKP4/CADM1/LRP6/SPATA7/SLC37A3/ZNF621/MECP2/GIGYF2/SDAD1/SLC11A2/MTERF2/ZMYND11/BBS9/LGR6/NEK9/MDM1/PPWD1/LCLAT1/MAGEF1/FARP2/ANG/RASSF8/BOLA1/USP51/CR…
GO_NEGATIVE_REGULATION_OF_CELL_DEATH	C5_GO	953	0.331407	1.75793	4.55823e-13	8.08405e-11	4324	tags=29%, list=20%, signal=24%	TNF/TNFRSF18/WT1/CCL5/THBS1/CSF1/NFATC4/TCF7/MTRNR2L1/SNAI1/STAR/ICAM1/FOXC1/IER3/MMP9/BCL3/CLCF1/NGFR/IL2RB/AGR2/IL6/PDCD1/WNT1/PROK2/CCL2/PAX8/SERPINE1/CD28/MPO/ZC3H12A/CCR7/BCL2A1/NTRK1/NR4A3/TWIST1/HCK/TIMP1/BCL6/SERPINB2/BAG3/NFKBIA/PLAUR/ERBB3/TNFAIP3/ANXA1/LEF1/AGR3/APOE/CDKN1A/WNT9A/PTGS2/MSX2/CDKN2D/PRAME/SHH/RNF157/CRYAB/PIM3/SOX8/FGF21/CSF2/CNTF/PPIF/LMNA/RIPK2/WNT11/SPRY2/GATA3/FCER1G…
GSE360_L_DONOVANI_VS_B_MALAYI_LOW_DOSE_DC_UP	C7_immunologic	197	0.510042	2.3397	4.94062e-13	8.71214e-11	2233	tags=30%, list=10%, signal=28%	CCL3/ADM/CXCL8/INHBA/CCL5/DUSP5/ARC/G0S2/IER3/MMP9/TUBB2A/CD83/WNT10B/GADD45G/ARL4C/RASL10A/MT2A/NINJ1/IL2RG/GADD45B/ISG15/SLC2A3/HLX/TNFAIP3/FILIP1L/NFKBIE/RGL1/CHST7/CHI3L1/MARCKSL1/PPP1R16B/EMP3/MAP2K3/CASP5/FAM131B/BIRC3/CST7/ETS2/NECTIN2/FSCN1/SYN1/MT1G/RNF19B/TRAF1/TNFAIP6/GEM/LINC01558/MGAT4C/NFKB1/DDIT4/SLC31A2/LYPD3/INSM1/ADAM8/RND3/HHLA1/MT1E/ZFP36L1/IRF7/SLC22A4
RUNNE_GENDER_EFFECT_UP	C2_curated	7	0.994659	2.12982	5.62424e-13	9.86128e-11	123	tags=100%, list=1%, signal=99%	RPS4Y1/EIF1AY/KDM5D/UTY/ZFY/DDX3Y/USP9Y
GSE19198_CTRL_VS_IL21_TREATED_TCELL_24H_UP	C7_immunologic	190	0.522133	2.37827	6.05558e-13	1.05576e-10	3546	tags=37%, list=16%, signal=31%	TNF/ADM/CP/TNFRSF4/CXCL3/CCL4/IL1RN/TFPI2/ICAM1/CD70/TRIB1/CD83/IL6/CXCL2/ATF3/SERPINE1/GADD45G/ZC3H12A/CCR7/MT2A/GADD45B/TIMP1/CHAC1/DUSP10/CDKN1A/UPP1/PLIN2/CXCL11/NMB/JDP2/GBP2/F2RL3/PLK2/RHOB/SPRY1/CXCL9/BCL2L14/ECE2/TNFAIP2/UBC/EDN1/SLC3A2/UBALD2/IL15RA/NFIL3/RGS1/DDIT3/TIMP3/MAFF/RND3/GZMB/ENC1/MT1E/PDE4B/IL10/CSF3/PHC1/HIF1A/LOX/TSC22D3/ANGPT2/SBDS/ODC1/PLA1A/EMP1/PSMA2/NFE2L2/TNIP2/NMT2/T…
MODULE_38	C4_computational	453	0.400314	2.00218	6.2437e-13	1.08244e-10	2244	tags=25%, list=10%, signal=23%	ROR2/TNF/ADM/RRAD/CXCL1/DUSP5/PHLDA2/TCF7/SPP1/FBN2/IER3/ECE1/COL6A2/COL1A2/PLAU/S100A9/FBLN2/HSPA2/CNN3/ATF3/SERPINE1/GADD45G/ARL4C/DUSP4/HPGD/PRG2/PEG10/TEAD3/LRRC32/DLK1/S100A8/RAB31/COL6A1/HAP1/CCND1/PKP3/ERBB3/TNFAIP3/TST/ANXA1/ACTG2/APOE/JUNB/CDKN1A/UPP1/PLIN2/S100P/CRYAB/FGR/ALAS2/GATA3/ADGRE5/RHOB/HMOX1/SH3BP1/ABCA1/EMP3/MAP2K3/PTH1R/CDC42EP1/TNFRSF10C/LTBP1/ITGB5/SLC29A1/TRPM2/TNFRSF10D/…
GO_POSITIVE_REGULATION_OF_CELLULAR_COMPONENT_MOVEMENT	C5_GO	547	0.376147	1.92021	6.49901e-13	1.12041e-10	3504	tags=28%, list=16%, signal=24%	ROR2/TNF/CCL3/TNFRSF18/ZNF703/CXCL8/TTLL6/CCL5/CXCL10/THBS1/HBEGF/CSF1/CCL4/PDGFA/FEZ1/NTN1/HAS2/SNAI1/ADGRA2/ICAM1/F3/MMP9/IL23A/PLAU/IL6/SERPINE1/ZC3H12A/CCR7/SEMA6A/TCAF2/XCL1/NEDD9/NR4A3/TWIST1/GPER1/BCL6/CLEC7A/RRAS2/RNF207/IL34/ANXA1/LEF1/PTGS2/ITGAX/SEMA7A/FGR/WNT11/SPRY2/GATA3/PRKCA/EDN3/VEGFA/C5AR1/RAB25/CCR1/MCAM/PLK2/RHOB/S1PR1/RELN/HMOX1/APELA/CD99/DYSF/NOX4/MAP2K3/CORO1A/FPR2/C3AR1/C…
NAGASHIMA_EGF_SIGNALING_UP	C2_curated	55	0.724904	2.67205	6.59922e-13	1.13136e-10	2065	tags=56%, list=10%, signal=51%	EGR4/LIF/DUSP5/ARC/HBEGF/DUSP2/TNFRSF12A/IER3/TRIB1/SOWAHC/DLX2/ATF3/MIR22HG/NEDD9/NR4A3/JUNB/BHLHE40/FOSL1/EGR3/AREG/KLF6/IER2/ZFP36/ETS2/EDN1/HES1/NR4A1/GEM/NAB2/TIPARP/MAFF
GSE8384_CTRL_VS_B_ABORTUS_4H_MAC_CELL_LINE_DN	C7_immunologic	198	0.505207	2.31676	6.93407e-13	1.1822e-10	1999	tags=24%, list=9%, signal=22%	TNF/KDM5D/CXCL3/CXCL10/HBEGF/CCL4/DUSP2/TNFRSF9/IL1RN/F3/IER3/MMP9/BCL3/RELB/LTB/SERPINE1/SLFN12L/IL5RA/MT2A/GADD45B/SERPINB2/CCND1/NFKBIA/PLAUR/CNR2/CDKN1A/PTGS2/PIM3/SAT1/VEGFA/CYBB/C5AR1/MAP2K3/NFKB2/ZFP36/GADD45A/ETS2/SOCS3/CRABP1/FURIN/TNFRSF1B/RNF19B/TRAF1/MYL3/IL18RAP/DDIT3/PIM1
GSE18281_CORTICAL_VS_MEDULLARY_THYMOCYTE_UP	C7_immunologic	197	0.507846	2.32963	7.27473e-13	1.23347e-10	2732	tags=32%, list=13%, signal=28%	TNF/CXCL3/CCL5/CXCL10/HBEGF/CSF1/PHLDA1/IL1RN/IL4I1/HLA-G/ICAM1/BCL3/S100A10/CEBPD/CXCL2/ATF3/RASD1/GADD45G/SLFN12L/MT2A/LGALS3BP/GADD45B/ISG15/NFKBIA/PLAUR/PTGS2/STAT1/GBP2/GCH1/CHI3L1/PELI1/PLK2/AREG/MARCKSL1/KLF6/LY6E/CH25H/TNFAIP2/AXL/IRF1/NECTIN2/NFKBIB/IFIT3/MPEG1/TNFRSF1B/RNF19B/TAP1/IRGM/IFIT2/PARM1/DDIT3/CLIC4/HLA-B/IRF7/SAMHD1/ISG20/CYBA/ATF4/ACOD1/CMPK2/C3/LCN2/USP18
BLANCO_MELO_COVID19_SARS_COV_2_INFECTION_A594_ACE2_EXPRESSING_CELLS_RUXOLITINIB_UP	C2_curated	415	0.409256	2.0387	7.49759e-13	1.26171e-10	3268	tags=29%, list=15%, signal=25%	TNF/ADM/PTX3/CXCL8/CXCL1/CXCL3/GPR3/LIF/ARC/KCNN1/IL11/TNFRSF9/MARCKS/IER3/OASL/STX11/BCL3/CD83/NGFR/RELB/IRF4/CREB5/LTB/CXCL2/CCL2/ATF3/ZC3H12A/BCL2A1/NR4A3/BHLHE41/IER5/DUSP10/N4BP3/NFKBIA/TNFAIP3/FILIP1L/HAVCR2/NFKBIE/IRAK2/ARID3B/BMF/FOSL1/UBASH3A/GOLGA7B/NPHS1/KLF6/CCDC73/IER2/SLC16A14/LSMEM1/NFKBID/NFKB2/CSRNP1/BIRC3/ZFP36/LILRA6/PDGFB/RNASEK/GADD45A/IRF1/SCUBE2/B3GNT5/HES1/LINC00472/ZNF296…
GSE7509_UNSTIM_VS_FCGRIIB_STIM_MONOCYTE_DN	C7_immunologic	158	-0.560635	-2.42152	7.52309e-13	1.26171e-10	5412	tags=53%, list=25%, signal=40%	IFT140/ATP9B/PPOX/NFRKB/CCNT2/OSBPL7/TTLL4/DEPDC5/STX3/KLC1/TCIRG1/DMTF1/ELK4/TNRC6A/PMS2/PHC3/CCNL2/PBX3/BRWD3/RBM28/NDOR1/PRPF38B/ZBTB37/PRDM10/RSAD1/C2CD3/ATP8A1/N4BP2L2/CLK2/CPEB1/SORBS3/BCKDHB/MICAL3/APPL2/AASDH/CHD9/SMTN/CCDC77/MAP3K4/TIAM1/MACF1/SLC4A8/SNAPC4/ITPR1/GOLGA1/PLA2G6/IFT80/SCAPER/ZFYVE16/SH3PXD2A/CNTRL/TAF1A/PAN2/OGT/HELQ/IKBKB/FRY/ARV1/NAV1/MCOLN1/VWF/IFFO1/TNRC6C/FMN1/ASXL2/M…
FLECHNER_BIOPSY_KIDNEY_TRANSPLANT_REJECTED_VS_OK_UP	C2_curated	85	0.648946	2.5831	8.07067e-13	1.34623e-10	3270	tags=51%, list=15%, signal=43%	CCL5/IL10RA/MMP9/FCN1/IFITM1/S100A8/RAB31/TYROBP/LCK/CD48/LY86/STAT1/FCER1G/GBP2/APOC1/CD3D/SFN/IFI30/CORO1A/CSTA/CD27/UBC/FCGR3A/LST1/TNFRSF1B/CFD/PIM2/FCGR1A/ITGB2/COL6A3/ACKR1/LILRB4/RGS10/ISG20/CD8A/FABP5/LCN2/CD52/TYMP/LGALS9/RHOH/UBE2L6/LCP1
HINATA_NFKB_TARGETS_KERATINOCYTE_UP	C2_curated	84	0.653727	2.59282	8.87308e-13	1.47212e-10	2096	tags=40%, list=10%, signal=37%	TNF/PTX3/CXCL8/CXCL3/CCL5/CXCL10/IL1RN/ICAM1/MMP9/CD83/PLAU/IL6/SERPINE1/BCL2A1/SERPINB2/NFKBIA/TNFAIP3/CDKN1A/CXCL11/CSF2/GBP1/VEGFA/MAP2K3/TNFAIP2/GADD45A/IRF1/TRAF1/TNFAIP6/TAP1/EGFR/NFKB1/VIM/MTSS1/RND3
AIZARANI_LIVER_C2_KUPFFER_CELLS_1	C8_cellSignature	195	0.51236	2.34659	9.93003e-13	1.63867e-10	2673	tags=34%, list=12%, signal=30%	IRF8/CXCL8/LGALS1/SLC15A3/IER3/CD83/GPR183/SGK1/NR4A3/HCK/RGS2/RAB31/CLEC7A/IER5/TYROBP/MAP3K8/PLAUR/ANXA1/LY86/ITGAX/FGR/MAFB/FCER1G/SAT1/CYBB/C5AR1/FCGR2A/CCR1/AREG/FPR1/BASP1/RNASE6/CCL3L3/C3AR1/MSR1/CSF1R/LILRB3/AXL/HSPA6/NLRP3/FCGR3A/SH2B3/LST1/PLEKHO1/RGCC/COTL1/MPEG1/TNFRSF1B/NCF2/AHR/REL/ITGB2/TMSB4X/VIM/LILRB4/RGS1/RGS10/S100A11/HERPUD1/MNDA/SAMHD1/TMSB10/CD1C/CPM/TLR2/FABP5
GO_REGULATION_OF_CELL_ADHESION	C5_GO	702	0.35552	1.84877	9.99717e-13	1.64097e-10	2573	tags=21%, list=12%, signal=19%	TNF/CD276/TNFRSF18/ZNF703/PDE3B/CXCL8/TNFSF9/LGALS1/LIF/CLECL1/CCL5/THBS1/FOXA1/CSF1/IL2RA/IL1RN/HAS2/CXCR3/HLA-G/ICAM1/TESC/CD70/CD83/LAX1/IL23A/S100A10/AGR2/PLAU/IL6/PDCD1/PLXNA1/FBLN2/IL12RB1/SDC4/WNT1/CCL2/SERPINE1/CD28/ZC3H12A/DMP1/CCR7/CD3E/SEMA6A/FOXJ1/XCL1/SOCS1/ZAP70/LRRC32/CD6/NEDD9/NINJ1/NR4A3/TNFSF11/RND1/BCL6/HLX/DUSP10/MAP3K8/PLAUR/ERBB3/CYP1B1/EFNA5/HAVCR2/ANXA1/TBX21/CRTAM/LEF1/LC…
DIRMEIER_LMP1_RESPONSE_EARLY	C2_curated	62	0.698799	2.63988	1.02175e-12	1.66826e-10	2385	tags=53%, list=11%, signal=48%	TNF/CCL3/TNFSF9/DUSP5/CCL4/DUSP2/ICAM1/CD83/GPR183/LTA/ZC3H12A/EGR2/TRAF4/BCL2A1/CD69/GADD45B/NFKBIA/TNFAIP3/NFKBIE/JUNB/EGR3/SLAMF1/KLF6/IER2/NFKB2/BIRC3/ZFP36/TRAF1/BTG2/HERPUD1/ACTB/IRF7/HMGCS1
GAL_LEUKEMIC_STEM_CELL_DN	C2_curated	231	0.479437	2.2324	1.11669e-12	1.81368e-10	3242	tags=36%, list=15%, signal=31%	RRAD/CXCL1/LGALS1/ZFY/CCL5/HCAR3/CCL4/IL1RN/CXCR3/G0S2/SLC15A3/MMP9/STX11/SERPINA1/COL6A2/IL2RB/CEBPD/IGKC/FCN1/S100A9/P2RX5/S100A12/S100A8/NPAS3/MRC2/PRTN3/CYP1B1/DNAAF1/S100P/FGF21/GPR65/FGR/MAFB/FCGR2A/CCR1/AZU1/IFI30/PRDM1/FCAR/FPR1/MS4A3/C3AR1/SLC16A6/CACNA1G/LILRB3/CSTA/CDC42EP3/E2F1/PCLAF/NR4A1/NCF2/FCGR1A/TNFAIP6/ALDH1L1/CLC/TPI1/LILRB4/ORC1/MNDA/ENC1/OSGIN2/LGALS3/IGLL1/SLC22A4/PLK1/SAMH…
GO_MYELOID_LEUKOCYTE_ACTIVATION	C5_GO	645	0.366562	1.88882	1.17407e-12	1.8969e-10	4689	tags=31%, list=22%, signal=25%	TNF/CCL3/PTX3/CXCL8/CXCL1/CCL5/THBS1/CSF1/GPR84/IL1RL1/RETN/MMP9/SERPINA1/RELB/IRF4/PLAU/IL6/FCN1/S100A9/CD177/LDLR/MPO/ZC3H12A/S100A12/EPX/PRG2/S100A8/NR4A3/SLC2A3/RAB31/TYROBP/PLAUR/PRTN3/HAVCR2/MCEMP1/CNR2/S100P/CSF2/CRISPLD2/ITGAX/MILR1/FGR/SERPINB12/FCER1G/CYBB/C5AR1/ADGRE5/FCGR2A/CHI3L1/CD68/AZU1/SLAMF1/CHIT1/TCN1/HMOX1/FCAR/FPR1/DYSF/BPI/SIGLEC14/MS4A3/FPR2/C3AR1/CD33/NEU1/CLEC4D/LILRB3/KR…
GSE5542_UNTREATED_VS_IFNG_TREATED_EPITHELIAL_CELLS_24H_DN	C7_immunologic	183	-0.532314	-2.35105	1.27639e-12	2.05146e-10	4163	tags=43%, list=19%, signal=35%	TRAV8-3/ZNF84/WDR36/GAL3ST4/CTSO/MYC/ALDH5A1/C16orf74/MEGF6/ZC4H2/FGGY/KIAA0040/BCKDHB/FANCF/METTL3/OSBPL5/ZNF740/ALDH3A2/PLCG1/GGACT/E2F5/ZKSCAN7/KCNQ1/SSBP2/NOC3L/ZNF470/TMEM19/SLC16A10/TCEA3/ARMCX1/LMLN/FBP1/PLXNA2/ZNF333/LDLRAP1/ZNF550/IGF1R/PLEKHG4/RAD54B/LMO7/BACH2/CLUAP1/HLA-DOA/ITGA6/PTGR2/NMNAT3/C2CD2/ATL1/SPPL2B/ALPK1/SULT1B1/TSPAN32/NOG/C8orf37/OSGEPL1/TOM1L2/TXK/KCNQ5/ZNF711/TMEM229B/…
GSE8515_CTRL_VS_IL1_4H_STIM_MAC_DN	C7_immunologic	188	0.509002	2.32032	1.3456e-12	2.1515e-10	1965	tags=28%, list=9%, signal=26%	TNF/PTX3/CXCL8/CXCL1/CXCL3/LIF/HCAR3/CCL4/ICAM1/CD70/IER3/BCL3/RELB/IL6/PLXNA1/SDC4/CXCL2/ZC3H12A/TNNI1/CCR7/HCK/GADD45B/SERPINB2/NFKBIA/TNFAIP3/NFKBIE/JUNB/PPIF/RUNDC3B/EGR3/MARCKSL1/CDKN2B/TNFAIP2/EZR/NFKB2/EBI3/SLC2A6/CEBPB/FSCN1/LINC00472/PLK3/RAP2C/ABTB2/CHST2/TRAF1/TNFAIP6/REL/MBL2/ROM1/IL15RA/NFKB1/GYPC/HTR6
GO_REGULATION_OF_LEUKOCYTE_PROLIFERATION	C5_GO	232	0.478227	2.22872	2.1397e-12	3.40356e-10	2573	tags=28%, list=12%, signal=25%	CD276/TNFRSF4/TNFSF9/CLECL1/CCL5/CSF1/IL2RA/HLA-G/CD70/CLCF1/GPR183/IL23A/IL6/IL12RB1/SDC4/CD28/CD3E/IL5RA/FOXJ1/XCL1/ZAP70/LRRC32/CD6/BCL6/TYROBP/TNFAIP3/IL34/HAVCR2/ANXA1/CRTAM/CDKN1A/SHH/TNFRSF13C/RIPK2/GAL/PELI1/CORO1A/CSF1R/ICOSLG/CHRNB2/PLA2G2F/EBI3/IRF1/CEBPB/LST1/TNFRSF1B/HES1/IGF1/TLR9/AHR/FCRL3/FLT3LG/CLC/VTCN1/CCL19/TNFSF8/MNDA/CD320/LGALS3/TMIGD2/TNFRSF13B/MIF/KITLG/IL10/LILRB1/IL4
GSE22886_CTRL_VS_LPS_24H_DC_DN	C7_immunologic	183	0.512889	2.32364	3.01379e-12	4.76937e-10	3348	tags=34%, list=15%, signal=29%	MSC/CCL5/DUSP5/DUSP2/IL2RA/TNFRSF9/G0S2/KYNU/HLA-G/ICAM1/PMAIP1/OASL/CD83/IRF4/ZC3H12A/CCR7/IFITM1/MT2A/NINJ1/APOBEC3A/NR4A3/LGALS3BP/ISG15/IER5/TNFAIP3/STAT1/RIPK2/GBP1/GCH1/SLAMF1/MARCKSL1/NFKB2/BIRC3/EBI3/TEX30/IFIT3/IFI6/PIM2/PTGER4/IFITM2/TRAF1/TNFAIP6/TAP1/REL/IFIT2/IL15RA/NFKB1/NFIL3/MTSS1/HLA-B/IRF7/PDE4B/ISG20/CSRP2/USP18/HLA-A/TXN/TYMP/CDCA4/UBE2L6/SAMSN1/SEC61B
MODULE_83	C4_computational	311	0.438613	2.11705	3.30239e-12	5.19941e-10	9763	tags=72%, list=45%, signal=40%	RPS4Y1/DDX3Y/GADD45G/EEF1A2/IER2/KPNA2/PLA2G2A/EIF5A/TMSB4X/COX6A1/CD63/C1QBP/ALDOA/PSMA1/PSMB5/TIPIN/PFN1/PSMB1/EIF3C/SCAND1/YBX1/P4HB/HSBP1/PSMA2/PRELID1/SEC61B/SNRPB/GNAS/ARHGDIA/EIF1/RPS16/FKBP2/YWHAG/RBM3/SRP19/EIF4A3/HIGD2A/RPS2/VDAC1/RPS17/FAU/PLEKHF2/PPIB/PKM/SRP14/CAPNS1/PSMB3/B2M/RPLP2/STRAP/RPL28/NDUFS5/SNRPD2/PTMA/RPS27A/PSMD8/STMN1/COX5B/BZW1/RPL23A/RPL29/RPLP1/RPL6/EIF4H/SDHB/RPS15/…
MODULE_6	C4_computational	405	0.401397	1.99644	3.85083e-12	6.03212e-10	2098	tags=26%, list=10%, signal=24%	ADM/RRAD/CXCL8/CXCL1/CCL5/DUSP5/PHLDA2/TPSAB1/JCHAIN/G0S2/F3/IER3/CYP1A1/SERPINA1/COL6A2/COL1A2/AGR2/S100A9/FBLN2/CYP2F1/HSPA2/CCL2/CNN3/ATF3/LDLR/FOXJ1/CD6/S100A8/GADD45B/SLC2A3/RAB31/COL6A1/BCL6/CCND1/ERBB3/TNFAIP3/CYP1B1/ANXA1/CHST1/ACTG2/JUNB/CDKN1A/S100P/CRYAB/DPYSL3/MUC4/ALAS2/VEGFA/CD79A/RHOB/GPRC5A/TCN1/SPRY1/EMP3/MAP2K3/PDLIM4/CH25H/MXRA5/CDC42EP1/LTBP1/TNFAIP2/ITGB5/NCALD/NQO1/SGCE/TRPM…
NABA_MATRISOME_ASSOCIATED	C2_curated	741	0.345256	1.79491	3.90739e-12	6.0898e-10	3370	tags=27%, list=16%, signal=23%	TNF/CCL3/CXCL8/TNFSF9/CXCL1/LGALS1/CXCL3/INHBA/LIF/CCL5/CXCL10/HBEGF/CSF1/ASTL/CCL4/PDGFA/IL11/IL1RN/LGALS12/MMP9/SERPINA1/CLCF1/HTRA3/IL23A/S100A10/PLAU/IL6/FCN1/PLXNA1/LTA/S100A9/WNT10B/LTB/SDC4/CXCL2/WNT1/CCL2/ADAMTS15/SDC2/SERPINE1/SEMA6A/S100A12/SFRP4/XCL1/S100A8/MMP19/F12/ADAMTS14/TNFSF11/TIMP1/CLEC7A/SERPINB2/S100A5/IL34/ANXA1/WNT9A/S100P/CXCL11/CLEC2B/SHH/FGF21/CSF2/CNTF/MUC4/C1QTNF7/IL36…
GSE34179_THPOK_KO_VS_WT_VA14I_NKTCELL_DN	C7_immunologic	195	0.503948	2.30806	4.20085e-12	6.49549e-10	2462	tags=28%, list=11%, signal=25%	IRF8/ADM/CXCL3/LIF/DUSP5/CCL4/IL2RA/TNFRSF9/JPH1/IL1RN/MARCKS/MYRF/KYNU/TTLL10/CYP1A1/TRIB1/SOWAHC/CD83/IRF4/HCAR2/EGR2/CD69/RASL10A/NR4A3/GADD45B/KCNF1/TNFSF11/FAM167A/TMEM158/TNFRSF13C/EFEMP1/BHLHE40/EGR3/CYP11B2/MARCKSL1/SPRY1/MAS1/EFHD1/UTF1/PCLAF/FSCN1/MPEG1/NDFIP2/C17orf50/NR4A1/FCER2/SLC3A2/CCL22/MTHFD2/CLIC4/UHRF1/HAVCR1/CCR8/PAK5/CSF3
GSE360_L_MAJOR_VS_B_MALAYI_HIGH_DOSE_DC_UP	C7_immunologic	196	0.500623	2.29299	4.20978e-12	6.49549e-10	2139	tags=23%, list=10%, signal=21%	EIF1AY/CCL3/TPPP/MSC/STX1A/GPR3/PDE1A/DUSP5/HCAR3/HBEGF/PHLDA2/IL1RN/ICAM1/IER3/MMP9/AQP9/GPD1/GADD45G/MT2A/DLK1/NEDD9/NFKBIA/PLAUR/SLC6A8/TNFAIP3/CDKN1A/CDKN2D/SAT1/MARCKSL1/BPI/BASP1/TNFAIP2/CST7/ETS2/RFX2/FSCN1/TNFRSF1B/IFI6/SYN1/CHST2/TRAF1/TAGLN3/RGS1/MTHFD2/S100A11/MT1E
BMI1_DN_MEL18_DN.V1_UP	C6_oncogenic	143	0.555623	2.42031	4.46608e-12	6.85665e-10	2244	tags=35%, list=10%, signal=32%	ADM/CXCL8/TNFSF9/CXCL1/STX1A/INHBA/LIF/HBEGF/CSF1/TNFRSF9/HAS2/TMEM51/F3/P2RX5/GFPT2/ATF3/ZC3H12A/ARL4C/PTHLH/CCND1/DUSP10/PLAUR/FGF21/CSF2/CRISPLD2/GAL/VEGFA/FOSL1/ADGRE5/ABCA1/COL7A1/C3AR1/SLC7A5/BIRC3/NT5E/GADD45A/COL13A1/EDN1/ADM2/PLEKHO1/ADGB/CLDN1/TNFAIP6/WNT5B/NRP2/LRRC15/PIM1/TIMP3/SLC22A4/ITGA3
PLASARI_TGFB1_TARGETS_10HR_UP	C2_curated	192	0.499448	2.27374	4.54028e-12	6.93607e-10	2146	tags=33%, list=10%, signal=30%	PLEKHG3/INHBA/LIF/DUSP5/ARC/HBEGF/GPR84/PDGFA/IL11/TNFRSF12A/HAS2/TFPI2/SNAI1/PMAIP1/IER3/MMP9/IL6/HSPA2/GFPT2/SERPINE1/PRAG1/EGR2/PTHLH/HCK/GADD45B/GPER1/PLAUR/TNFAIP3/GREM2/JUNB/WNT9A/PTGS2/FGF21/CRISPLD2/SEMA7A/WNT11/VEGFA/BHLHE40/GCH1/FOSL1/MCAM/SFN/IER2/NEBL/TSPAN2/NGF/NRARP/CSRNP1/PDGFB/MFSD2A/ACTA1/PLK3/PAPSS2/RNF19B/NFIL3/CARD10/TGFB1/TMCC3/MEOX1/TIMP3/MAFF/MICAL2/ANKRD1
MODULE_16	C4_computational	501	0.380681	1.92304	5.59944e-12	8.51198e-10	6093	tags=38%, list=28%, signal=28%	TNF/CCL3/CXCL8/TMSB4Y/GPR3/LIF/CCL5/ARC/CCL4/TCF7/VENTX/KYNU/IER3/MMP9/GPR183/PLAU/S100A9/CCL2/LDLR/MPO/PRG2/S100A8/IL2RG/HCK/SLC2A3/RAB31/SERPINB2/HAP1/PLAUR/PRTN3/CYP1B1/ANXA1/CHST1/PLIN2/S100P/PRAME/FGR/FEV/ALAS2/NMB/FCER1G/CYBB/SH3BP1/EMP3/MAP2K3/CORO1A/BASP1/CDC42EP1/CD33/ECE2/MYBL2/GNA15/SLC7A5/LSP1/CSTA/GADD45A/CST7/CYP4B1/LST1/NFKBIB/RHOG/PTP4A1/CCNE1/PCLAF/DOLK/ATP4A/TNFRSF1B/CFD/PTTG1/P…
GSE360_LOW_DOSE_B_MALAYI_VS_M_TUBERCULOSIS_DC_DN	C7_immunologic	196	0.497654	2.27939	6.55266e-12	9.91218e-10	2653	tags=32%, list=12%, signal=28%	CCL3/INHBA/DUSP5/HBEGF/IL2RA/IL10RA/G0S2/KYNU/ICAM1/IER3/OASL/MMP9/TUBB2A/SERPINA1/CD83/SH3BP5/S100A9/CCL2/PAX8/ATF3/CCR7/BCL2A1/MT2A/S100A8/IL2RG/PLAUR/CD48/CSF2/GBP2/CYBB/SLAMF1/MAP2K3/LY6E/BASP1/CASP5/C3AR1/GNA15/BIRC3/ELL2/CD27/FSCN1/TSPOAP1/ANXA2/MT1G/PFKFB3/RNF19B/GEM/IFIT2/NRP2/B3GNT2/PDE4D/PIM1/UBE2S/PLA2G7/RND3/MT1E/SLC22A4/MAD2L1BP/CCL25/DENND3/ALAS1/HSPA5/NME1
GO_CELLULAR_RESPONSE_TO_MOLECULE_OF_BACTERIAL_ORIGIN	C5_GO	209	0.487503	2.25971	7.00984e-12	1.0552e-09	3681	tags=35%, list=17%, signal=29%	TNF/CCL3/IRF8/CXCL8/CXCL1/CXCL3/CCL5/CXCL10/STAR/ICAM1/TRIB1/IL6/CXCL2/CCL2/SERPINE1/ZC3H12A/CD6/HCK/NFKBIA/TNFAIP3/HAVCR2/LY86/CXCL11/IRAK2/CSF2/IL36RN/RIPK2/PRKCA/CD68/ABCA1/CXCL9/BPI/RARA/AXL/ZFP36/NLRP3/TICAM2/CEBPB/NFKBIB/TNFRSF1B/CARD17/IRGM/DAB2IP/NFKB1/PDE4D/VIM/STAP1/TGFB1/ANKRD1/PDE4B/MIF/LY96/IL10/CSF3/ACOD1/CMPK2/LILRB1/TLR2/LCN2/TICAM1/RHOA/WNT5A/HMGB2/IRAK1/CXCL13/PLAA/NOD2/TNIP2/LI…
GSE41087_WT_VS_FOXP3_MUT_ANTI_CD3_CD28_STIM_CD4_TCELL_UP	C7_immunologic	185	0.501088	2.27607	7.31605e-12	1.09595e-09	3295	tags=32%, list=15%, signal=28%	TNFRSF4/PDE3B/MSC/DUSP2/IL10RA/KYNU/BCL3/CD83/GPR183/RELB/IRF4/FCN1/SDC4/AQP9/ATF3/SDC2/CCR7/S100A12/IL2RG/HCK/NFKBIA/TNFAIP3/DNAAF1/NFKBIE/JUNB/S100P/CD5/VEGFA/PRR16/MARCKSL1/SLC16A6/ICOSLG/BIRC3/CST7/SLC2A6/IRF1/NCF2/AHR/CHST2/TRAF1/NFKB1/FHL3/CCL22/BTG2/DNAJB5/PDE4B/GNG5/ISG20/LOR/TSC22D3/TICAM1/C15orf39/ITGAE/GNG11/CYTIP/MAMLD1/LYZ/EBLN2/LCP1/CXCL13
GSE42724_MEMORY_VS_B1_BCELL_DN	C7_immunologic	181	0.51331	2.33322	9.24302e-12	1.37792e-09	1902	tags=31%, list=9%, signal=29%	TNFRSF4/TNFRSF18/INHBA/CCL5/DUSP5/IL2RA/TNFRSF9/KYNU/IL21R/RELB/SDC4/LDLR/CCR7/DUSP4/ACHE/GADD45B/NFKBIA/TNFAIP3/CDKN1A/SHD/PIM3/GBP1/SAT1/VEGFA/GCH1/ETV7/SCD/FXYD6/COL7A1/BASP1/NFKBID/C17orf58/TNFAIP2/CSRNP1/C17orf49/GPR132/EBI3/GADD45A/SLC2A6/IRF1/NECTIN2/FSCN1/SOCS3/SPACA7/HAPLN3/PIM2/ABTB2/C15orf48/TRAF1/TNFAIP6/TAP1/IL15RA/C1S/EPSTI1/HEXIM1/NFKB1/MYO1G
GSE3982_CTRL_VS_LPS_48H_DC_DN	C7_immunologic	187	0.499191	2.27239	9.39174e-12	1.38967e-09	2572	tags=27%, list=12%, signal=24%	TNFRSF4/INHBA/CCL5/CXCL10/HBEGF/CSF1/CCL4/IL2RA/TRIB1/SERPINA1/ATF3/SERPINE1/GADD45G/TSKU/CCR7/IFITM1/TWIST1/LGALS3BP/GADD45B/ISG15/NFKBIA/PLAUR/TNFAIP3/FILIP1L/CRISPLD2/PPIF/SLAMF1/MARCKSL1/BASP1/BEGAIN/NQO1/CSTA/RUNX3/NT5E/IFIT3/FSCN1/IFI6/IFITM2/RNF19B/REL/HEXIM1/CCL19/STAP1/PIM1/RND3/IRF7/ISG20/LILRA4/ALAS1/ITGA8/LOR
NFKAPPAB_01	C3_motif	246	0.460247	2.15795	9.41185e-12	1.38967e-09	1640	tags=23%, list=8%, signal=22%	TNF/MSC/GNG4/CCL5/CXCL10/BCL6B/IL2RA/TNFRSF9/IL1RN/NTN1/IL4I1/ICAM1/CD70/ANKFN1/MMP9/BCL3/CD83/IL23A/RELB/PLAU/LTA/HCST/WNT10B/LTB/SDC4/CXCL2/TRAF4/GADD45B/RND1/IER5/MAP3K8/CXCL11/SESN2/TRIB2/BMF/ZMYND15/HOXB9/WNT10A/CXCL9/NFKBID/SMPD3/NFKB2/BDNF/BIRC3/ELMSAN1/EBI3/PARP8/BNC2/IRF1/S1PR2/SH2B3/KCNS3/NFKBIB/TNFRSF1B/EIF5A/RAP2C/LAMA1
GSE41176_UNSTIM_VS_ANTI_IGM_STIM_BCELL_3H_UP	C7_immunologic	193	0.493872	2.25133	1.00521e-11	1.47713e-09	2163	tags=27%, list=10%, signal=25%	TNF/PTX3/CXCL8/CXCL1/CXCL3/INHBA/CCL4/DUSP2/IL2RA/MARCKS/G0S2/TFPI2/SLC15A3/PMAIP1/UPB1/F3/IER3/IL23A/HAS1/IL6/AQP9/CXCL2/ZC3H12A/BCL2A1/MT2A/NINJ1/PLAUR/TNFAIP3/DNAAF1/PTGS2/CYB5R2/FPR2/EBI3/ETS2/SLC2A6/NFKBIB/MT1H/SOCS3/TNFRSF1B/PLK3/MT1G/RAP2C/ABTB2/PFKFB3/TRAF1/TNFAIP6/WNT5B/MEG3/IL15RA/MAFF/INSM1/MT1E/SNN
SATO_SILENCED_BY_METHYLATION_IN_PANCREATIC_CANCER_1	C2_curated	406	0.398664	1.97877	1.09032e-11	1.59461e-09	3099	tags=29%, list=14%, signal=25%	TNF/CCL3/PTX3/WT1-AS/HDC/CCL5/DUSP5/HBEGF/CSF1/CCL4/TMEM51/SNAI1/HLA-G/ICAM1/PMAIP1/IER3/SERPINA1/NGFR/HSPA2/LTB/HOXA1/CNN3/SERPINE1/TSKU/XCL1/LRRC32/DLK1/MMP19/TWIST1/GPER1/RAB31/CHAC1/DUSP10/MRC2/PLAUR/CYP1B1/ZCCHC24/LCK/CDKN1A/UPP1/CYB5R2/CSF2/ULBP2/EFEMP1/IL36RN/HPGDS/KCNJ2/LHX6/SERPINF1/SUSD4/CHI3L1/PELI1/CACNA1A/SSUH2/MCAM/SCD/SFN/SPON1/HBA1/MGAT3/CACNA1G/NEU1/EFHD1/LHX1/NFKB2/BIRC3/TNFRSF1…
GSE3920_UNTREATED_VS_IFNA_TREATED_FIBROBLAST_UP	C7_immunologic	163	0.518841	2.30734	1.13875e-11	1.65758e-09	3386	tags=33%, list=16%, signal=28%	CCL3/DUSP8/RRAD/PHLDA1/DUSP2/SLC15A3/ICAM1/UPB1/CD83/RELB/ZC3H12A/DUSP4/SIPA1L2/CD69/MT2A/NINJ1/NR4A3/GADD45B/TNFAIP3/SH2D2A/SESN2/RNF157/CLDND2/PPP1R16B/RARA/NFKBID/CSRNP1/BIRC3/ELL2/SH2B3/IL3/PLK3/ABTB2/TRAF1/ARL5B/HIVEP1/NFKB1/FBXW9/NAB2/PIM1/HERPUD1/ZBTB43/CCR8/BCL2L11/ATF4/ITK/AEN/ODC1/SLC17A6/SPATA2/MXD1/ADORA2A/GABARAPL1
GSE29618_MONOCYTE_VS_PDC_DAY7_FLU_VACCINE_UP	C7_immunologic	196	0.494173	2.26344	1.21509e-11	1.7604e-09	3305	tags=36%, list=15%, signal=31%	CXCL8/HCAR3/HBEGF/IL1RN/MARCKS/G0S2/GAS7/TREM1/FBN2/IER3/TRIB1/RAB20/SERPINA1/CEBPD/FCN1/S100A9/SGK1/S100A12/APOBEC3A/HCK/SLC2A3/TIMP1/BCL6/CLEC7A/CYP1B1/UPP1/CRISPLD2/FGR/MAFB/SAT1/VEGFA/GBP2/GCH1/C5AR1/PELI1/IFI30/HMOX1/FPR1/CD33/TNFAIP2/CSF1R/LILRB3/NLRP3/CDC42EP3/EFHD2/CEBPB/LST1/TNFRSF1B/NCF2/AHR/CLIC1/ITGB2/NFIL3/SLC31A2/ITGAM/ADAM8/MICAL2/TUBA4A/ZFP36L1/DENND3/TLR2/ALDOA/CKAP4/GAPDH/RNASE2…
MIR607	C3_motif	958	-0.336746	-1.74854	1.25619e-11	1.81143e-09	3878	tags=25%, list=18%, signal=21%	UBE3C/PKNOX1/KL/RFX3/ZBTB44/KIAA1109/ABHD10/NKIRAS1/ATXN3/KALRN/ARHGAP5/CBLB/SLFN11/SKP2/KIF14/USP46/HLCS/PKD2/DISC1/RNF180/CNTLN/TMEM170B/MON2/SLC35A3/HDAC8/CPEB1/PARP11/SLC16A7/AGAP4/CLOCK/ATF7IP/TMEM106B/PRMT3/SYNPO2/NAPB/TRPC5OS/ASF1A/GPAM/SPOCK3/ANKRD44/ALG10B/ST8SIA4/AASDH/LNPK/KLHL31/IRAK3/AGAP5/SCAI/MCTS1/NRG3/FGL2/NR1D2/HIVEP2/USP33/CCZ1B/ZNF250/PURA/USP54/AP1AR/MDM1/COL5A1/TMEM245/GTPBP…
PLASARI_TGFB1_TARGETS_1HR_UP	C2_curated	33	0.805857	2.66138	1.27585e-11	1.83123e-09	1491	tags=61%, list=7%, signal=57%	LIF/HBEGF/SNAI1/IER3/IL6/FBLN2/SERPINE1/GADD45G/EGR2/GADD45B/IER5/JUNB/WNT9A/PTGS2/BHLHE40/EGR3/CSRNP1/HES1/ID2/NR4A1
GO_POSITIVE_REGULATION_OF_LEUKOCYTE_PROLIFERATION	C5_GO	145	0.533113	2.32252	1.33964e-11	1.91389e-09	2377	tags=30%, list=11%, signal=27%	CD276/TNFRSF4/TNFSF9/CLECL1/CCL5/CSF1/IL2RA/CD70/CLCF1/GPR183/IL23A/IL6/IL12RB1/CD28/CD3E/IL5RA/XCL1/ZAP70/CD6/BCL6/IL34/HAVCR2/ANXA1/CDKN1A/SHH/TNFRSF13C/RIPK2/PELI1/CORO1A/CSF1R/ICOSLG/CHRNB2/EBI3/HES1/IGF1/TLR9/FCRL3/FLT3LG/VTCN1/CCL19/CD320/TMIGD2/MIF/KITLG
NEMETH_INFLAMMATORY_RESPONSE_LPS_UP	C2_curated	85	0.632224	2.51654	1.39372e-11	1.98197e-09	2310	tags=40%, list=11%, signal=36%	TNF/CCL3/TNFSF9/BCL6B/IL1RN/IL1RL1/IER3/CEBPD/LTB/ATF3/SLFN12L/HCK/NFKBIA/CDKN1A/PTGS2/STAT1/SAT1/GCH1/MARCKSL1/IER2/C3AR1/MSR1/CLEC4D/MYADM/ETS2/FURIN/TNFRSF1B/TAP1/IRGM/NFKB1/LILRB4/TGFB1/PRKCD/MAPKAPK2
REACTOME_GPCR_LIGAND_BINDING	C2_curated	460	0.386113	1.93382	1.40851e-11	1.99381e-09	4017	tags=35%, list=18%, signal=30%	CCL3/ADM/CXCL8/CXCL1/CXCL3/HCAR1/GNG4/CCL5/CXCL10/HCAR3/CCL4/CXCR3/GPR183/ECE1/TRH/HCAR2/SSTR2/WNT10B/FZD8/CHRM4/CXCL2/WNT1/PROK2/CCL2/GPBAR1/CCR7/ADRA2B/GHRHR/S1PR3/XCL1/PTHLH/NPW/GPER1/ANXA1/CNR2/ADRB1/GPR31/WNT9A/CCR4/CXCL11/SHH/LPAR5/GPR65/GALR2/WNT11/PLPPR3/GAL/NMB/EDN3/RAMP1/NPFFR1/C5AR1/ADGRE5/F2RL3/CCR1/WNT10A/S1PR1/FPR1/GHRL/CXCL9/GLP2R/DRD5/PTH1R/FPR2/CCL3L3/C3AR1/ECE2/GPHA2/NTSR1/CCL3L…
REACTOME_NEUTROPHIL_DEGRANULATION	C2_curated	473	0.387509	1.94339	1.44177e-11	2.03158e-09	5935	tags=38%, list=27%, signal=28%	PTX3/CXCL1/GPR84/RETN/MMP9/SERPINA1/PLAU/FCN1/S100A9/CD177/MPO/S100A12/EPX/PRG2/S100A8/SLC2A3/RAB31/TYROBP/PLAUR/PRTN3/MCEMP1/S100P/CRISPLD2/ITGAX/FGR/SERPINB12/FCER1G/CYBB/C5AR1/ADGRE5/FCGR2A/CHI3L1/CD68/AZU1/CHIT1/TCN1/FCAR/FPR1/BPI/SIGLEC14/MS4A3/FPR2/C3AR1/CD33/NEU1/CLEC4D/LILRB3/KRT1/TRPM2/HSPA6/DSP/TICAM2/SIGLEC5/PRG3/ADGRE3/RHOG/IQGAP1/COTL1/ANXA2/TNFRSF1B/MMP25/CFD/FLG2/RAP2C/SLC27A2/TNFA…
GSE7218_IGM_VS_IGG_SIGNAL_THGOUGH_ANTIGEN_BCELL_DN	C7_immunologic	167	0.511172	2.29039	1.46111e-11	2.04947e-09	4491	tags=43%, list=21%, signal=34%	TNFRSF18/CCL5/CXCL10/IL2RA/ICAM1/IL12RB1/LTB/CD28/SYTL3/CD69/IFITM1/SOCS1/ZAP70/FAM107B/ZBTB32/FILIP1L/HAVCR2/NFKBIE/TBX21/LEF1/LCK/UPP1/CXCL11/GBP5/CSF2/STAT1/KCNK5/UBASH3A/CD3D/BIRC3/CD27/RUNX3/UTF1/EDN1/MFSD2A/IFIT3/ICOS/IL3/PTTG1/RNF19B/REL/GEM/IFIT2/IL18RAP/EPSTI1/SLC31A2/FAM166B/ISG20/CCR8/CD8A/ITK/LCN2/USP18/LAT/CACNG3/UBE2L6/SAMSN1/VIL1/NAMPT/ADORA2A/LAP3/AKNAD1/TAGAP/KCNJ13/SLC43A3/PAX7/…
GSE3920_UNTREATED_VS_IFNG_TREATED_ENDOTHELIAL_CELL_UP	C7_immunologic	144	0.539998	2.35481	1.5024e-11	2.09785e-09	2935	tags=35%, list=14%, signal=30%	TNF/TNFRSF4/RRAD/LIF/CXCL10/DUSP5/CCL4/PLAU/ZC3H12A/SEMA6A/DUSP4/EGR2/CD69/NR4A3/GADD45B/TNFSF11/CYP24A1/CHAC1/TNFAIP3/SH2D2A/CDKN1A/IRAK2/STAP2/EGR3/PPP1R16B/MAP2K3/MYOC/UTF1/PTCHD1/MFSD2A/HRH3/DKK2/FGFR1/PLK3/TRAF1/TNFRSF25/SLC3A2/KRTAP26-1/REL/FBXW9/RND3/CCR8/CYP2E1/SGMS2/ITK/RPH3A/MYBPC3/FLRT3/PLSCR2/AEN
GSE25123_CTRL_VS_ROSIGLITAZONE_STIM_PPARG_KO_MACROPHAGE_UP	C7_immunologic	193	0.491266	2.23945	1.60856e-11	2.22698e-09	3656	tags=40%, list=17%, signal=34%	CXCL3/NRIP3/HCAR3/PHLDA1/DUSP2/IL1RN/TREM1/SERPINA1/GPR183/S100A10/CREB5/FCN1/AQP9/CXCL2/S100A12/BCL2A1/PLP2/APOBEC3A/MMP19/DUSP10/PLAUR/TNFAIP3/DNAAF1/MCEMP1/CD48/UPP1/PLIN2/PRAME/ITGAX/PPIF/RIPK2/FGR/OLIG1/VEGFA/AREG/IFFO2/MAP2K3/SLC16A6/BIRC3/CSTA/NLRP3/LILRA1/CD1B/CCDC83/ITPRIP/C15orf48/PFKFB3/TRAF1/GLIPR2/TMEM88/NFIL3/MTHFD2/ADAM8/TAGLN2/ELF4/OSM/GGT1/CD1C/PGAM1/SGMS2/SLC46A2/CCL18/FABP5/MIR…
GSE32986_UNSTIM_VS_GMCSF_STIM_DC_UP	C7_immunologic	188	-0.510065	-2.26525	1.60931e-11	2.22698e-09	5187	tags=51%, list=24%, signal=39%	FAM160A2/LEMD2/RALGPS2/ALMS1/ITPKB/ABCC2/GGT7/NDRG2/PEX3/WDPCP/ELK4/IFIT1/RPGR/PHC3/SCML1/DDX31/VWA8/SNRPN/SMARCA2/NUP160/ZDHHC17/USP44/CCDC130/CCDC57/RIMKLB/CCNH/EPHA1/ERCC6L2/DNAJB13/GAL3ST4/UBR3/ADGRL1/PXYLP1/APBB1/TPCN1/LINS1/PLXDC1/ZCWPW1/TRMT11/SIAH3/ACAD11/SPATA5/SLC38A6/MPP7/SIN3B/MINDY1/SLC8B1/TCEA3/DDX60/C12orf42/LTBP3/FBP1/TMCO6/LDLRAP1/ENGASE/RECK/ZNF337/BACH2/ICE2/SPG11/PITPNM2/LAIR1…
BENPORATH_PRC2_TARGETS	C2_curated	633	0.351613	1.80912	1.65926e-11	2.28586e-09	4234	tags=35%, list=19%, signal=29%	MSC/EGR4/WT1/WT1-AS/COL4A5/FEZ1/NTN1/CD70/FBN2/SLC30A2/SPAG6/NEUROG3/TRH/SSTR2/DLX2/WNT10B/WNT1/PROK2/PAX8/ATF3/ADAMTS15/DUSP4/GALNT18/FOXJ1/PHOX2B/RASL10A/HPCAL4/PTHLH/NTRK1/NR4A3/BHLHE41/CYP24A1/HLX/HBA2/NEUROG2/TBX21/ADRB1/METRNL/SORCS3/RTN4RL2/SHH/GABRA2/TRPC5/ESAM/GATA3-AS1/FEV/GALR2/MAFB/WNT11/GATA3/OTX1/LHX6/FOXB1/OLIG2/ZMYND15/SUSD4/SCN4B/WNT10A/EGR3/MNX1/OCA2/SIX3/FOXL1/SYT12/SPON1/DRD5/…
GO_NEUTROPHIL_MIGRATION	C5_GO	117	0.577309	2.45357	1.69755e-11	2.32821e-09	3295	tags=42%, list=15%, signal=36%	CCL3/CXCL8/CXCL1/CXCL3/CCL5/CXCL10/CCL4/IL23A/S100A9/CXCL2/CCL2/CD177/CCR7/S100A12/XCL1/S100A8/PRTN3/CXCL11/FCER1G/EDN3/C5AR1/CD99/DYSF/CXCL9/CCL3L3/C3AR1/CCL3L1/DPEP1/EDN1/RHOG/XG/ITGB2/CCL22/PDE4D/CCL19/SLIT2/ADAM8/LGALS3/PDE4B/UMODL1/CCL25/C1QBP/CCL18/DAPK2/CKLF/CCL15/CAMK1D/RHOH/CXCL13
GSE13738_RESTING_VS_BYSTANDER_ACTIVATED_CD4_TCELL_DN	C7_immunologic	193	0.490712	2.23692	1.76298e-11	2.40725e-09	2931	tags=28%, list=13%, signal=25%	TNF/TNFRSF18/LGALS1/HBEGF/PLPP1/DUSP2/TNFRSF9/TESC/TRIB1/IL2RB/IRF4/SH3BP5/LTA/HCST/SGK1/PDE4A/NEDD9/C12orf75/MAP3K8/NFKBIE/IRAK2/SAT1/BHLHE40/ADGRE5/EGR3/SLAMF1/PRDM1/PPP1R16B/RAB11FIP1/MAP2K3/GNA15/BIRC3/RUNX3/ANXA2/TNFRSF1B/PTTG1/CLIC1/COX5A/C4orf46/LAMTOR2/SIPA1L1/ADAM8/SMAD7/FOSL2/TAGLN2/PDE4B/OSM/NDUFA6/IL12RB2/SHMT2/LRRC59/ENO1/TIPIN/STK24/EBP
GSE29618_MONOCYTE_VS_PDC_UP	C7_immunologic	194	0.492797	2.24876	1.87395e-11	2.54751e-09	3545	tags=40%, list=16%, signal=34%	CXCL8/HCAR3/HBEGF/IL1RN/MARCKS/G0S2/GAS7/TREM1/FBN2/IER3/TRIB1/RAB20/SERPINA1/S100A10/CREB5/S100A9/S100A12/BCL2A1/APOBEC3A/HCK/SLC2A3/RAB31/TIMP1/BCL6/CLEC7A/TYROBP/CYP1B1/ANXA1/LY86/UPP1/CRISPLD2/ITGAX/PPIF/FGR/MAFB/GBP2/C5AR1/PELI1/RHOB/HMOX1/FPR1/IER2/CD33/TNFAIP2/CSF1R/LILRB3/NLRP3/CDC42EP3/LILRA1/EFHD2/LST1/TNFRSF1B/NCF2/IFITM2/RNF19B/ITGB2/NFIL3/SLC31A2/PLA2G7/S100A11/LGALS3/ZFP36L1/TLR2/CK…
GO_POSITIVE_REGULATION_OF_CELL_ADHESION	C5_GO	420	0.39384	1.95969	1.90548e-11	2.579e-09	2573	tags=24%, list=12%, signal=21%	TNF/CD276/TNFRSF18/TNFSF9/LGALS1/LIF/CLECL1/CCL5/FOXA1/CSF1/IL2RA/HAS2/HLA-G/ICAM1/CD70/CD83/IL23A/S100A10/AGR2/IL6/PDCD1/FBLN2/IL12RB1/SDC4/CCL2/CD28/DMP1/CCR7/CD3E/XCL1/SOCS1/ZAP70/CD6/NEDD9/NINJ1/NR4A3/TNFSF11/BCL6/HLX/DUSP10/MAP3K8/PLAUR/HAVCR2/ANXA1/LEF1/LCK/CD5/SHH/TNFRSF13C/RIPK2/EDIL3/GATA3/PRKCA/VEGFA/EGR3/AZU1/DYSF/RELL2/RARA/CORO1A/NFKBID/ICOSLG/APOA1/NLRP3/FOXA2/CD27/MYOC/MYADM/EBI3/R…
HAMAI_APOPTOSIS_VIA_TRAIL_UP	C2_curated	637	-0.36399	-1.82508	2.06314e-11	2.78019e-09	5904	tags=41%, list=27%, signal=31%	GOLGB1/GPALPP1/WWP1/ZNF43/FER/MIS18BP1/PUM3/SETX/XRCC4/DDX10/UFL1/ZNF443/MFAP1/ASRGL1/TTC37/NKAP/BTBD7/USP48/AKAP11/RAPGEF6/KIF16B/DNAJB14/CELF2/RIF1/VLDLR/ZC3H8/PKIB/ALDH2/NEMF/SLC45A2/LINC00467/BLM/BDP1/PHGDH/IFT74/SCAF11/ZNF195/ERGIC2/SLC30A5/ZDHHC11/RAD17/RINT1/PRPF39/ARMC1/ETAA1/PHF20L1/MKI67/GCC2/RNF13/SRSF11/TCIRG1/CHORDC1/ZNF85/MSH3/NIPBL/QSER1/CEP192/SPECC1/SREK1/KIDINS220/PNISR/OSBPL1A/…
MODULE_118	C4_computational	398	0.398338	1.97291	2.16937e-11	2.91064e-09	3747	tags=31%, list=17%, signal=26%	TNF/CCL3/TMSB4Y/CXCL1/GPR3/GSTM1/CCL5/THBS1/CCL4/PHLDA2/DDX3Y/SPP1/IER3/MMP9/IL1RAP/PLAU/CCL2/GFPT2/IGF2BP3/CNN3/SERPINE1/LDLR/MPO/BCL2A1/PEG10/DLK1/S100A8/IL2RG/HCK/ISG15/RAB31/HAP1/CYP1B1/ANXA1/TMEM158/JUNB/CDKN1A/PLIN2/S100P/CLEC2B/PRAME/DPYSL3/EFEMP1/FCER1G/CD79A/APOC1/CD3D/ABCA1/EMP3/PDLIM4/CORO1A/BASP1/CD33/ECE2/MYBL2/ITGB5/NQO1/SGCE/SLC7A5/TRPM2/LSP1/DSP/E2F1/CST7/SOX4/PCLAF/CRABP1/ATP4A/P…
GO_POSITIVE_REGULATION_OF_CELL_CELL_ADHESION	C5_GO	274	0.445114	2.11627	2.24237e-11	2.99556e-09	3556	tags=31%, list=16%, signal=26%	TNF/CD276/TNFSF9/LGALS1/CLECL1/CCL5/FOXA1/IL2RA/HAS2/HLA-G/ICAM1/CD70/CD83/IL23A/IL6/PDCD1/IL12RB1/CCL2/CD28/CCR7/CD3E/XCL1/SOCS1/ZAP70/CD6/NR4A3/TNFSF11/BCL6/HLX/DUSP10/MAP3K8/PLAUR/HAVCR2/ANXA1/LEF1/LCK/CD5/SHH/TNFRSF13C/RIPK2/GATA3/EGR3/RARA/CORO1A/NFKBID/ICOSLG/NLRP3/FOXA2/CD27/EBI3/RUNX3/CD160/SOX4/ICOS/HES1/SOX2/IGF1/ITGB2/VTCN1/LILRB4/CCL19/FUT3/ADAM8/SMAD7/TMIGD2/FGG/PIK3R1/IL10/GLI2/LILR…
WANG_RESPONSE_TO_GSK3_INHIBITOR_SB216763_UP	C2_curated	342	-0.434088	-2.06233	2.32866e-11	3.09743e-09	4817	tags=43%, list=22%, signal=34%	AGL/ZFAS1/IDS/TNFSF13B/ZNF230/TPTE2/FRRS1/VWA8/SNRPN/KRBOX4/TIMP2/CDK5RAP3/ACRBP/VPS8/CLN8/C1RL/GIMAP2/FIG4/ATP8B4/GNS/MANBA/TTC17/SAT2/SND1-IT1/PTPN22/FGD2/ARNT/KIAA1109/KDM4A/RCOR3/TMEM131/RHOT1/DMXL2/EFHC1/FGGY/CTSH/CD84/TMEM106B/USO1/MALAT1/SERINC5/TMEM86A/TRAK2/SDCCAG8/TTLL3/FGL2/CD36/FAM220A/TLR1/SORL1/GTF2IRD2/ALG13/ATG16L2/DTNA/GBGT1/ACAD11/MFSD13A/GOLGA1/SLC38A6/PDE1B/ANKRD26/COLGALT2/SC…
GO_REGULATION_OF_HEMOPOIESIS	C5_GO	455	0.384027	1.9246	2.36941e-11	3.13809e-09	2962	tags=23%, list=14%, signal=21%	ROR2/TNF/CCL3/TNFRSF18/TNFSF9/INHBA/LIF/THBS1/CSF1/IL2RA/TCF7/HLA-G/TESC/FOXC1/TRIB1/CD83/IL23A/IRF4/IL12RB1/CD28/ZC3H12A/FOXJ1/SOCS1/ZAP70/NR4A3/ISG15/TNFSF11/BCL6/HLX/TYROBP/DUSP10/NFKBIA/IL34/ANXA1/TBX21/CRTAM/LEF1/SHH/CSF2/STAT1/RIPK2/MAFB/GATA3/PRKCA/CCR1/EGR3/PRDM1/ZNF683/RARA/NFKBID/PSMA8/LILRB3/NRARP/AXL/ZFP36/NLRP3/CD27/RUNX3/IRF1/SOX4/CEBPB/HES1/ID2/TLR9/PGLYRP1/FCRL3/FLT3LG/SPINK5/RARG…
GSE21063_3H_VS_16H_ANTI_IGM_STIM_BCELL_DN	C7_immunologic	186	-0.511657	-2.26889	2.38842e-11	3.14976e-09	6396	tags=65%, list=29%, signal=46%	ARHGEF6/DNAAF5/TMEM205/AFF1/IFRD2/TM7SF3/NME7/PHF14/PHKB/NBAS/HECTD4/PCCA/POMGNT1/AP1G2/DROSHA/MIPEP/FAAP100/PIGG/TMEM218/DOCK8/GSTCD/USP32/STAG1/RNF123/SLC4A2/ATE1/CENPJ/ASB16-AS1/RAB4B/TEP1/NFYB/WASHC3/RHBDD1/CUL4B/ANKS1A/NUP107/MZF1/PDSS2/TCF12/MEN1/WDR59/RIOX2/FIG4/DECR1/KMT5B/EXOC2/TIA1/KIAA0319L/GNPAT/CATSPERB/MAVS/ZNF512/ATR/FBXO4/EFCAB14/TMEM131/RHOT1/DPP4/PKP4/TRERF1/STK3/TRADD/CHD9/LNPK…
GSE360_CTRL_VS_M_TUBERCULOSIS_DC_DN	C7_immunologic	192	0.490438	2.23272	2.43244e-11	3.19416e-09	2047	tags=27%, list=9%, signal=25%	CCL3/MSC/DUSP5/CCL4/CCNA1/IL1RN/G0S2/KYNU/ICAM1/IER3/TRIB1/MMP9/TUBB2A/STX11/CD83/RELB/S100A9/CCR7/MT2A/S100A8/NR4A3/IL2RG/NFKBIA/MUC4/GBP1/VEGFA/GBP2/CHST7/FCGR2A/MAP2K3/C3AR1/TNFAIP2/NCALD/EFHD1/ELL2/RUNX3/GADD45A/CPNE6/MT1H/FSCN1/IFI6/MT1G/IFITM2/PFKFB3/RNF19B/TRAF1/IFIT2/NRP2/SOX9/RGS1/LYPD3/S100A11
GO_LYMPHOCYTE_DIFFERENTIATION	C5_GO	364	0.408171	1.99868	2.52102e-11	3.2887e-09	2618	tags=25%, list=12%, signal=22%	TNFRSF18/TNFSF9/LGALS1/INHBA/IL11/IL2RA/TCF7/HLA-G/BCL3/CD83/CLCF1/GPR183/IL23A/RELB/IRF4/IL6/IL12RB1/FZD8/WNT1/LFNG/CD28/ZC3H12A/POU1F1/CCR7/CD3E/FOXJ1/SOCS1/ZAP70/NTRK1/BCL6/HLX/DUSP10/ANXA1/TBX21/CRTAM/LEF1/LCK/SHH/RIPK2/MAFB/GATA3/FCER1G/CD79A/EGR3/CD3D/PRDM1/ZNF683/KLF6/RARA/NFKBID/CLEC4D/NRARP/AXL/NLRP3/CD27/RUNX3/IRF1/CCR9/SOX4/ID2/PTGER4/IFNA7/TLR9/ITM2A/PGLYRP1/FCRL3/FLT3LG/SPINK5/LILRB4…
PICCALUGA_ANGIOIMMUNOBLASTIC_LYMPHOMA_DN	C2_curated	131	0.547557	2.35093	2.52576e-11	3.2887e-09	5171	tags=47%, list=24%, signal=36%	DUSP2/PMAIP1/TUBB2A/DUSP4/CD69/CD6/NR4A3/GADD45B/SLC2A3/RGS2/IER5/DUSP10/MAP3K8/TNFAIP3/GATA3/PELI1/CBX4/AREG/KLF6/CSRNP1/ZFP36/ATP2B1-AS1/GADD45A/PTP4A1/RGCC/ID2/PTGER4/REL/B3GNT2/PDE4D/RGS1/TIPARP/SLC30A1/FOSL2/MEX3C/IRF2BP2/ZBTB10/TSC22D3/PPP1R15B/SBDS/HECA/MXD1/THAP2/RNF11/NAMPT/GABARAPL1/STK17B/PIGA/EIF1/PTP4A2/C16orf72/BTG1/MYLIP/FBXO33/RNF139/SARAF/JUND/TOB1/ZFAND2A/PPP1R15A/CSGALNACT2
GO_NEUTROPHIL_CHEMOTAXIS	C5_GO	99	0.593274	2.44414	2.62578e-11	3.40458e-09	3071	tags=40%, list=14%, signal=35%	CCL3/CXCL8/CXCL1/CXCL3/CCL5/CXCL10/CCL4/IL23A/S100A9/CXCL2/CCL2/CCR7/S100A12/XCL1/S100A8/CXCL11/FCER1G/EDN3/C5AR1/DYSF/CXCL9/CCL3L3/C3AR1/CCL3L1/DPEP1/EDN1/ITGB2/CCL22/PDE4D/CCL19/SLIT2/LGALS3/PDE4B/CCL25/C1QBP/CCL18/DAPK2/CKLF/CCL15/CAMK1D
MARTENS_BOUND_BY_PML_RARA_FUSION	C2_curated	435	0.388486	1.93269	2.64851e-11	3.41968e-09	2924	tags=23%, list=13%, signal=20%	IRF8/TNFRSF4/INHBA/DUSP5/B3GNT7/ASB2/GAS7/ICAM1/TESC/UPB1/MMP9/RAB20/BCL3/ECE1/FCN1/LFNG/ZC3H12A/ADGRG5/NINJ1/HCK/KPTN/RAB31/SLC24A3/TYROBP/TNFAIP3/UPP1/WNT9A/SLC7A10/TRNP1/C20orf197/KLF2/FGR/MAFB/OLIG1/TOX2/ARID3B/BHLHE40/OLIG2/C5AR1/SCUBE1/MCAM/FXYD6/HMOX1/RAB11FIP1/ZNF683/MAP2K3/RARA/GRIP2/TNFAIP2/SLC7A5/CYTH4/IZUMO4/NLRP3/GPR132/RUNX3/IRF1/EFHD2/PLEKHO1/NECTIN4/RFX2/COTL1/TSPOAP1/ID2/MORN3/TP…
ZWANG_DOWN_BY_2ND_EGF_PULSE	C2_curated	245	-0.475633	-2.17704	2.75756e-11	3.54564e-09	3810	tags=39%, list=18%, signal=33%	ZNF526/FAM156A/RCOR3/HSD17B7/PLAG1/STAG3/AGAP4/NAPB/ZNF740/USP28/GPAM/ZNF79/C12orf65/KIF18B/GLIDR/GTF2IRD2/HINFP/PER3/ZBTB7B/ZNF283/ZNF470/CCDC7/ZNF510/ARL17A/POC5/PDIK1L/ZNF33A/CARF/CSAD/ZSCAN22/C17orf80/ZNF37A/CCNF/FBXL8/ZNF117/UQCC1/ZNF280D/ZNF302/BRD8/MKKS/ZNF564/ZFP62/ZNF354B/RECK/ZNF589/FAM217B/ZNF225/ANKZF1/CTSK/OR52H1/POLH/SENP8/FAM227A/ZNF138/WDR89/DET1/E2F8/ZNF493/SYNRG/ZNF678/KCNQ4/TET…
TONKS_TARGETS_OF_RUNX1_RUNX1T1_FUSION_HSC_DN	C2_curated	189	0.496601	2.2567	2.83132e-11	3.62539e-09	2209	tags=32%, list=10%, signal=29%	HBG1/IRF8/LGALS1/HDC/CSF1/PLPP1/CCNA1/IL1RN/IL10RA/TESC/GPR183/NKG7/S100A9/P2RX5/LTB/CCL2/CCR7/PRG2/TRAF4/PDLIM1/PLP2/DOK2/TEAD3/SOCS1/KCNH2/MYL4/TYROBP/CCND1/DUSP10/CYP1B1/CD48/KCNK5/RAMP1/CYBB/FCGR2A/EGR3/RBM38/CAMK1/MS4A3/RARA/HBA1/FPR2/CD33/TRBC2/SLC7A5/BIRC3/CSTA/RUNX3/CST7/LST1/ID2/SLC27A2/SH3BGRL3/CLC/ALOX5AP/S100B/TIMP3/IGFBP5/MICAL2/TUBA4A/PRKCD
REACTOME_PEPTIDE_LIGAND_BINDING_RECEPTORS	C2_curated	195	0.493298	2.25929	2.89783e-11	3.69521e-09	3855	tags=37%, list=18%, signal=31%	CCL3/CXCL8/CXCL1/CXCL3/CCL5/CXCL10/CCL4/CXCR3/ECE1/TRH/SSTR2/CXCL2/PROK2/CCL2/CCR7/XCL1/NPW/GPER1/ANXA1/CCR4/CXCL11/GALR2/GAL/NMB/EDN3/NPFFR1/C5AR1/F2RL3/CCR1/FPR1/GHRL/CXCL9/FPR2/CCL3L3/C3AR1/ECE2/NTSR1/CCL3L1/INSL3/CCR9/EDN1/OPRK1/NTS/CCKBR/CCL22/ACKR1/CCL19/HCRTR1/BDKRB2/CCK/OPRM1/RXFP3/CCR8/CCL25/PROKR2/TAC3/C3/GRPR/TACR2/CXCL13/GPR37/CCKAR/XCR1/PNOC/PYY/CXCL16/PMCH/KISS1/CCL1/NMUR2/XCL2/UTS2B
GO_CELLULAR_RESPONSE_TO_LIPID	C5_GO	567	0.364983	1.86761	2.99219e-11	3.79984e-09	3686	tags=26%, list=17%, signal=23%	TNF/CCL3/IRF8/KDM5D/ZNF703/CXCL8/CXCL1/CXCL3/INHBA/CCL5/CXCL10/FOXA1/NFATC4/PLPP1/STAR/ICAM1/TESC/SPP1/TRIB1/IL6/SSTR2/WNT10B/CXCL2/CCL2/SERPINE1/GPBAR1/LDLR/ZC3H12A/GHRHR/CD6/NR4A3/HCK/GPER1/CYP24A1/NFKBIA/TNFAIP3/EFNA5/HAVCR2/ANXA1/LEF1/LY86/WNT9A/MSX2/CXCL11/IRAK2/CSF2/ESRRG/IL36RN/RIPK2/WNT11/PRKCA/SERPINF1/CD68/ABCA1/CXCL9/BPI/RARA/ADTRP/IRS1/AXL/ZFP36/NLRP3/PTGDR/E2F1/TICAM2/EDN1/CEBPB/STRA…
LINDSTEDT_DENDRITIC_CELL_MATURATION_B	C2_curated	47	0.731965	2.60579	3.16458e-11	4.00228e-09	1813	tags=53%, list=8%, signal=49%	ADM/PDGFA/IL2RA/TNFRSF9/MARCKS/CD83/RELB/SDC4/DUSP4/NR4A3/NFKBIA/TNFAIP3/SLAMF1/MARCKSL1/TNFAIP2/NFKB2/BIRC3/GADD45A/ID2/TRAF1/TAP1/REL/IL15RA/HIVEP1/NFKB1
GO_SECOND_MESSENGER_MEDIATED_SIGNALING	C5_GO	447	0.38343	1.91633	3.27692e-11	4.12744e-09	2009	tags=21%, list=9%, signal=19%	TNF/CCL3/ADM/PDE3B/CXCL8/GPR3/NPPC/CXCL10/THBS1/NFATC4/CCL4/JPH1/CXCR3/SAMD14/PDE9A/P2RX5/PDE4A/RASD1/TRAT1/CCR7/CD3E/ADRA2B/ADGRG5/GHRHR/JPH4/S1PR3/ZAP70/PTHLH/GPER1/RGS2/TNFSF11/RASD2/HAP1/ERBB3/CNR2/ADRB1/APOE/CCR4/PDE10A/CXCL11/ADGRF1/RNF157/NR5A1/GPR65/GALR2/GAL/GBP1/PRKCA/EDN3/VEGFA/RAMP1/ADGRE5/CCR1/AZU1/S1PR1/FPR1/PDE7B/ABCA1/CXCL9/DRD5/PTH1R/ANK2/FPR2/GPHA2/GUCY2F/NCALD/TRPM2/PDGFB/GPR61…
AIZARANI_LIVER_C5_NK_NKT_CELLS_3	C8_cellSignature	122	0.554869	2.37418	3.40418e-11	4.2703e-09	3839	tags=42%, list=18%, signal=35%	CD96/PRF1/CD7/CCL5/CCL4/DUSP2/SH2D1A/IL2RB/NKG7/HCST/PYHIN1/SYTL3/CD3E/CD69/XCL1/IFITM1/IL2RG/TYROBP/FCER1G/ADGRE5/AREG/PRDM1/CORO1A/CCL3L3/TRBC2/PARP8/RUNX3/CST7/CD160/TIGIT/TRDC/CCL4L2/PTGER4/ITGB2/ALOX5AP/GZMB/PIK3R1/TOX/SH2D1B/TSC22D3/CTSW/PFN1/CYTIP/IPCEF1/SLC38A1/LCP1/ARPC5L/SPON2/TAGAP/SLAMF6/XCL2
SMIRNOV_CIRCULATING_ENDOTHELIOCYTES_IN_CANCER_UP	C2_curated	155	0.518547	2.28524	3.46909e-11	4.33412e-09	2966	tags=38%, list=14%, signal=33%	ADM/CXCL8/THBS1/HBEGF/UPB1/IER3/CYP1A1/IL21R/PLAU/HS3ST1/AQP9/DUSP4/HCK/SLC2A3/SERPINB2/EPHA4/CYP1B1/CDKN1A/PLIN2/VEGFA/SGSH/BHLHE40/C5AR1/FCGR2A/CHI3L1/CCR1/MCAM/HMOX1/MARCKSL1/FPR1/ABCA1/RARA/COL7A1/C3AR1/SLC16A6/GNA15/SLC7A5/HSPA6/DHRS3/THBD/CEBPB/TNFRSF1B/NCF2/PFKFB3/TIE1/RGS1/TGFB1/MAFF/SMAD7/SLC22A4/ELF4/APOB/TLR2/DAPK2/SERPINB13/RNASE2/CD93/WNT5A/DHCR7
FAN_EMBRYONIC_CTX_BRAIN_EFFECTOR_T_CELL	C8_cellSignature	125	0.557008	2.38636	3.52713e-11	4.38886e-09	4043	tags=43%, list=19%, signal=35%	CD96/PRF1/CD7/CCL4/DUSP2/SH2D1A/IL2RB/NKG7/HCST/PYHIN1/CD3E/DOK2/CD69/XCL1/IFITM1/ZAP70/IL2RG/LCK/CD48/SH2D2A/CLEC2B/GPR65/FGR/ADGRE5/EMP3/LY6E/CORO1A/LSP1/RUNX3/CST7/IRF1/CD160/IQGAP1/ID2/IFITM2/CLIC1/ABI3/IL18RAP/ADAM8/GZMB/HLA-B/SH2D1B/HLA-A/CTSW/CYTIP/LCP1/CRIP1/ARID5A/STK17B/ARPC5L/SPON2/XCL2/LIMD2/BTG1
HALLMARK_INTERFERON_GAMMA_RESPONSE	Hallmark	198	0.481931	2.21002	3.70271e-11	4.58884e-09	3321	tags=34%, list=15%, signal=29%	IRF8/CCL5/CXCL10/IL10RA/HLA-G/ICAM1/ITGB7/OASL/IL2RB/IRF4/IL6/CCL2/CD69/XCL1/SOCS1/MT2A/LGALS3BP/ISG15/NFKBIA/TNFAIP3/CDKN1A/UPP1/PTGS2/CXCL11/STAT1/RIPK2/GCH1/PELI1/IFI30/FPR1/CXCL9/LY6E/TNFAIP2/IRF1/IFIT3/SOCS3/ST3GAL5/FCGR1A/IFITM2/TNFAIP6/TAP1/IFIT2/IL15RA/C1S/EPSTI1/LATS2/NFKB1/MTHFD2/PIM1/P2RY14/HLA-B/IRF7/PDE4B/SAMHD1/ISG20/ZBP1/CMPK2/HIF1A/USP18/HLA-A/FAS/PSMB2/HELZ2/GPR18/MX1/UBE2L6/NAMP…
GSE29617_CTRL_VS_TIV_FLU_VACCINE_PBMC_2008_UP	C7_immunologic	181	0.506649	2.30295	3.88416e-11	4.79446e-09	4168	tags=38%, list=19%, signal=31%	CXCL8/LIF/CXCL10/HBEGF/G0S2/BCL3/GPR183/ATF3/ZC3H12A/CD69/NR4A3/RGS2/SERPINB2/N4BP3/JUNB/RNF212B/PIM3/LDB2/BHLHE40/PLK2/LONRF2/CSRNP1/ZFP36/PTP4A1/KLHL15/TLCD1/MMP25/ICOS/NR4A1/PLK3/ITPRIP/KLK10/REL/CHRNA9/RGS1/MED26/BTG2/SLIT2/TIPARP/FOSL2/ZFP36L1/ELF4/PPTC7/PDE4B/SDE2/OSM/HIF1A/RASGEF1B/EBF3/DHCR7/CYTIP/ARMC12/CCDC71L/EBLN2/NR2E3/NAMPT/TMOD1/ARID5A/NFE2L2/TLE3/ZBTB21/FEM1C/COQ10B/ETF1/GPC4/WHAM…
GO_NEGATIVE_REGULATION_OF_IMMUNE_SYSTEM_PROCESS	C5_GO	419	0.393584	1.96054	4.47252e-11	5.49871e-09	2867	tags=26%, list=13%, signal=23%	TNF/CCL3/CD96/INHBA/THBS1/IL2RA/SH2D1A/IL1RL1/HLA-G/TRIB1/LAX1/PDCD1/SDC4/CCL2/LDLR/ZC3H12A/FOXJ1/XCL1/SOCS1/LRRC32/GPER1/BCL6/HLX/TYROBP/DUSP10/NFKBIA/TNFAIP3/HAVCR2/ANXA1/CNR2/TBX21/CRTAM/SHH/MILR1/FGR/MAFB/GAL/GBP1/FCER1G/SUSD4/PELI1/CD68/UBASH3A/HMOX1/BPI/RARA/ADTRP/NFKBID/EZR/LILRB3/NRARP/AXL/PLA2G2F/ZFP36/APOA1/RUNX3/CST7/IRF1/CD160/CEBPB/LST1/TIGIT/HES1/ADCYAP1/ID2/PTGER4/PGLYRP1/FCRL3/SPI…
GSE37533_UNTREATED_VS_PIOGLIZATONE_TREATED_CD4_TCELL_PPARG1_AND_FOXP3_TRASDUCED_UP	C7_immunologic	195	0.49127	2.25	4.59033e-11	5.62116e-09	4005	tags=38%, list=18%, signal=31%	TNFRSF4/CXCL8/MSC/CXCL1/CXCL3/INHBA/NRIP3/CCL4/IL1RN/CXCR3/G0S2/TFPI2/SPP1/F3/RELB/IL2RB/IL6/SDC4/SERPINE1/ZC3H12A/BCL2A1/BHLHE41/IL2RG/SLC2A3/PLAUR/TUBB6/UPP1/PPIF/FGR/BHLHE40/CHI3L1/FCAR/MARCKSL1/FPR2/NFKB2/EBI3/LRP12/CEBPB/FDX1/RGCC/FSCN1/NCF2/CHST2/HMGA1/CCL22/VIM/ALOX5AP/CLIC4/MAFF/ITGAM/FOSL2/ALAS1/C1QBP/NME1/PDK1/ENO1/GPX3/TXN/EMP1/CXCL13/RIT1/FBXO34/GATAD2A/TNIP1/CD80/NUTF2/TNIP3/NIP7/CCL…
GO_MYELOID_LEUKOCYTE_MEDIATED_IMMUNITY	C5_GO	548	0.363017	1.85299	4.91469e-11	5.99456e-09	4689	tags=30%, list=22%, signal=24%	CCL3/PTX3/CXCL1/GPR84/RETN/MMP9/SERPINA1/PLAU/IL6/FCN1/S100A9/CD177/MPO/S100A12/EPX/PRG2/S100A8/NR4A3/SLC2A3/RAB31/TYROBP/PLAUR/PRTN3/MCEMP1/S100P/CRISPLD2/ITGAX/MILR1/FGR/SERPINB12/FCER1G/CYBB/C5AR1/ADGRE5/FCGR2A/CHI3L1/CD68/AZU1/CHIT1/TCN1/HMOX1/FCAR/FPR1/BPI/SIGLEC14/MS4A3/FPR2/C3AR1/CD33/NEU1/CLEC4D/LILRB3/KRT1/TRPM2/HSPA6/DSP/TICAM2/SIGLEC5/PRG3/ADGRE3/RHOG/IQGAP1/COTL1/ANXA2/TNFRSF1B/MMP25/…
GO_POSITIVE_REGULATION_OF_HEMOPOIESIS	C5_GO	198	0.480477	2.20335	4.97949e-11	6.04969e-09	3251	tags=31%, list=15%, signal=26%	ROR2/TNF/TNFSF9/INHBA/LIF/CSF1/IL2RA/HLA-G/TESC/FOXC1/TRIB1/CD83/IL23A/IL12RB1/SOCS1/ZAP70/ISG15/TNFSF11/BCL6/HLX/TYROBP/DUSP10/IL34/ANXA1/LEF1/SHH/STAT1/RIPK2/GATA3/PRKCA/CCR1/EGR3/RARA/NFKBID/AXL/NLRP3/CD27/RUNX3/SOX4/ID2/FLT3LG/LILRB4/CCL19/TGFB1/ADAM8/ZFP36L1/TOX/KITLG/GLI2/CSF3/IL17A/IL4/HIF1A/HSPA1B/DCSTAMP/RHOA/HMGB2/LGALS9/POU4F2/RHOH/ACVR1B
GSE13485_DAY3_VS_DAY7_YF17D_VACCINE_PBMC_DN	C7_immunologic	185	0.49077	2.2292	5.16547e-11	6.25103e-09	2732	tags=30%, list=13%, signal=26%	TNF/CXCL10/GPR84/CCL4/IL1RN/MARCKS/IL4I1/OASL/CCL2/POU1F1/KLHDC7B/IFITM1/APOBEC3A/LGALS3BP/GADD45B/ISG15/CXCL11/RGL1/STAT1/GBP1/C1orf116/GCH1/CCR1/BCL2L14/LY6E/FPR2/C3AR1/AXL/SLC1A1/OTOF/S1PR2/SLC12A8/SLC7A13/IFIT3/IFI6/ABTB2/IFITM2/LINC00487/TNFAIP6/TAP1/IFIT2/FFAR2/EPSTI1/TMC1/DTL/LINC00880/IRF7/TYMS/NEXN/KITLG/CYP4F11/ZBP1/CMPK2/MIR3945HG/USP18
FAN_EMBRYONIC_CTX_BIG_GROUPS_BRAIN_IMMUNE	C8_cellSignature	142	0.534083	2.32112	5.40038e-11	6.50978e-09	4626	tags=42%, list=21%, signal=33%	CD96/CD7/DUSP2/SH2D1A/S100A10/HCST/LTB/CD3E/DOK2/CD69/IFITM1/IL2RG/GADD45B/ISG15/ANXA1/LCK/CD48/JUNB/CLEC2B/KLF2/FCER1G/ADGRE5/EMP3/LY6E/CORO1A/LSP1/ZFP36/IRF1/IQGAP1/IFITM2/SH3BGRL3/CLIC1/ITGB2/ABI3/S100A11/TAGLN2/HLA-B/ISG20/CNN2/HLA-A/TSC22D3/CD52/PFN1/CYTIP/DNAJB1/RHOH/LCP1/CRIP1/STK17B/TAGAP/UCP2/LIMD2/B2M/TAPBP/RPL28/PTPN6/ETS1/ARPC2/MYH9/MSN
GHANDHI_DIRECT_IRRADIATION_UP	C2_curated	100	0.589331	2.43224	5.56753e-11	6.68515e-09	2139	tags=35%, list=10%, signal=32%	CXCL8/CXCL1/CXCL3/INHBA/LIF/IL11/DUSP2/G0S2/KYNU/TESC/RELB/IL6/CREB5/CXCL2/BCL2A1/MT2A/SERPINB2/TNFAIP3/CDKN1A/PTGS2/GCH1/PRDM1/SLC16A6/TNFRSF10C/BIRC3/GADD45A/MT1H/RGS9/MYPN/MT1G/CLDN1/TIGAR/SLC30A1/PLEK2/MT1E
GSE25123_IL4_VS_IL4_AND_ROSIGLITAZONE_STIM_PPARG_KO_MACROPHAGE_DAY10_DN	C7_immunologic	187	0.487666	2.21993	5.75787e-11	6.88691e-09	1662	tags=26%, list=8%, signal=24%	TNF/TNFRSF4/TNFRSF18/CXCL8/CXCL3/CCL5/GPR84/PHLDA1/IL2RA/IL1RN/NACAD/TREM1/SPP1/CXCL2/ZC3H12A/KLHDC7B/TIMP1/C12orf75/PTGS2/KLF2/PPIF/PITPNM1/FXYD2/FCER1G/SGSH/NPFFR1/PRR16/FCGR2A/FXYD6/EMP3/MAP2K3/LY6E/COL7A1/TRPM2/TNFRSF10D/IRF2BPL/NT5E/ETS2/DDIT4L/RGCC/DGAT2/NCF2/SHB/PLK3/C15orf48/PFKFB3/VMP1/TEPP
GSE360_CTRL_VS_L_MAJOR_DC_DN	C7_immunologic	194	0.485967	2.21759	5.89943e-11	7.02898e-09	2028	tags=27%, list=9%, signal=25%	TNF/ADM/CXCL8/DUSP5/PHLDA2/IL1RN/G0S2/KYNU/IER3/TRIB1/MMP9/SERPINA1/IL23A/S100A10/P2RX5/CCL2/CCR7/MT2A/TIMP1/TNFAIP3/CD5/RGL1/CRYAB/GAL/TRPM1/MARCKSL1/ATP12A/SLC17A7/KLF6/FBLN5/THBD/ELL2/GADD45A/ETS2/IRF1/CPNE6/CABP1/IFI6/ID2/MT1G/AHR/TCP10/RNF19B/TNFAIP6/TAP1/SERPINA4/FLT3LG/DDIT4/SOX9/RGS1/LYPD3/PIM1/MEOX1
VILIMAS_NOTCH1_TARGETS_UP	C2_curated	51	0.698409	2.52392	6.53594e-11	7.75741e-09	2368	tags=55%, list=11%, signal=49%	TNFRSF18/CD7/CCL5/IL10RA/ICAM1/CD83/RELB/CD28/TRAT1/CCR7/EGR2/BCL2A1/CD69/ZAP70/RRAS2/NFKBIA/LCK/JUNB/GATA3/CD3D/NFKB2/NRARP/BIRC3/ID2/TRAF1/GZMB/IRF7/TOX
GSE37605_TREG_VS_TCONV_NOD_FOXP3_FUSION_GFP_UP	C7_immunologic	137	0.531656	2.29245	7.16101e-11	8.46672e-09	2132	tags=36%, list=10%, signal=33%	DUSP8/ADM/DUSP5/HBEGF/PHLDA1/IER3/TRIB1/OASL/COL6A2/CEBPD/SGK1/CCL2/ATF3/ADAMTS15/SERPINE1/EGR2/PEG10/NR4A3/JUNB/PTGS2/UPP2/NOX3/SPRY2/EGR3/PLK2/GABRD/SYT12/SPRY1/IER2/MAS1/BIRC3/ZFP36/GADD45A/FERMT2/EDN1/CEBPB/NR4A1/ARL4D/TERC/TNFAIP6/HMGA1/ASB16/RGS1/BTG2/IGF2-AS/MAFF/SMAD7/RND3/FOSL2/GFAP
GO_NEGATIVE_REGULATION_OF_CYTOKINE_PRODUCTION	C5_GO	266	0.442831	2.09948	7.76636e-11	9.13197e-09	2573	tags=26%, list=12%, signal=23%	TNF/TNFRSF4/CD96/INHBA/THBS1/IL1RL1/BCL3/CD83/IL23A/RELB/IL6/LILRA5/ZC3H12A/CCR7/EPX/FOXJ1/XCL1/LRRC32/TWIST1/ISG15/BCL6/TYROBP/TNFAIP3/HAVCR2/ANXA1/TBX21/LEF1/KLF2/IL36RN/WNT11/GATA3/GBP1/TRIB2/SLAMF1/HMOX1/GHRL/BPI/RARA/CD33/EZR/AXL/ZFP36/APOA1/NLRP3/TIGIT/RGCC/FURIN/CARD18/FGFR1/CARD17/PTGER4/FFAR4/IGF1/TLR9/PGLYRP1/REL/TMSB4X/NFKB1/DDIT3/TGFB1/SMAD7/ATP2B1/IL10/LILRA4/ACOD1/C1QBP/LILRB1/IL4
GSE18281_SUBCAPSULAR_VS_CENTRAL_CORTICAL_REGION_OF_THYMUS_DN	C7_immunologic	197	0.482339	2.21262	7.78285e-11	9.13197e-09	3280	tags=29%, list=15%, signal=25%	TNF/HDC/CCL5/TREM1/OASL/RAB20/SOWAHC/RELB/HCAR2/S100A9/SLFN12L/CCR7/SOCS1/S100A8/LGALS3BP/HCK/TIMP1/TNFAIP3/NFKBIE/TUBB6/CDKN1A/UPP1/STAT1/FGR/FCER1G/CYBB/CHI3L1/MARCKSL1/FPR1/CXCL9/KLF6/FPR2/GBP7/CLEC4D/IFIT3/SOCS3/NTS/TAP1/VMP1/HP/IRGM/IFIT2/RGS1/CLIC4/PRKCD/IRF7/MIF/ALAS1/ZBP1/MAPK6/CMPK2/LCN2/USP18/SRM/EEF1E1/UBE2L6/TNFRSF21/SAMSN1
GSE29618_MONOCYTE_VS_MDC_UP	C7_immunologic	195	0.486393	2.22766	9.12292e-11	1.06638e-08	2233	tags=31%, list=10%, signal=28%	ADM/CXCL8/HCAR3/SPRY4/MARCKS/G0S2/TREM1/FBN2/IER3/SERPINA1/FCN1/S100A9/CXCL2/LDLR/MPO/S100A12/EGR2/BCL2A1/MIR22HG/NINJ1/S100A8/APOBEC3A/TYROBP/NFKBIA/CYP1B1/UPP1/SULT1A2/CRISPLD2/FGR/MAFB/FCER1G/CYBB/C5AR1/FCGR2A/CCR1/PELI1/CD68/FXYD6/IFI30/HMOX1/FCAR/FPR1/ABCA1/LILRB3/NLRP3/CDC42EP3/LILRA6/ELL2/CEBPB/TNFRSF1B/CFD/NCF2/RNF19B/SLC31A2/BTG2/PLA2G7/ITGAM/TUBA4A/HLA-B/SLC22A4
GSE2770_TGFB_AND_IL4_VS_IL12_TREATED_ACT_CD4_TCELL_2H_DN	C7_immunologic	192	0.481288	2.19107	9.30064e-11	1.08305e-08	2310	tags=28%, list=11%, signal=25%	TNFRSF18/PDE3B/STX1A/HCAR1/HBEGF/PHLDA1/PDGFA/TNFRSF9/OASL/TUBB2A/CLCF1/IL2RB/PLXNA1/ATF3/DUSP4/BCL2A1/SOCS1/CD6/TIMP1/IER5/PLAUR/METRNL/SH2D2A/IRAK2/RDH10/VEGFA/PELI1/AREG/CD3D/PPP1R16B/CHRNG/SLC7A5/CSRNP1/IRGQ/EBI3/RNASEK/UBC/CEBPB/TSPOAP1/PTGER4/HOMER1/CALCB/C15orf48/IFIT2/DDIT4/SLC31A2/PDE4D/DDIT3/BTG2/MAFF/ADAM8/TMIGD2/CLIC5/MAPKAPK2
GSE40666_UNTREATED_VS_IFNA_STIM_STAT4_KO_EFFECTOR_CD8_TCELL_90MIN_DN	C7_immunologic	191	-0.502639	-2.23797	1.03057e-10	1.19558e-08	4421	tags=43%, list=20%, signal=35%	RALGAPA2/ATP6V0A1/KLF9/HPS4/SAV1/TMLHE/ZNF557/TAF1/MCTP2/NRIP1/ST3GAL1/USP13/SAYSD1/ZFP28/UHRF2/VPS13C/EIF4G3/ZNF880/SLC16A7/TPCN1/LNPEP/MTHFR/MYO9A/SP140L/PCMTD2/TRAK2/MEF2C/HSF5/PDE8A/STX7/ZNF514/DPYD/BTLA/COA1/DENND2D/FBXL4/C12orf42/AGPAT5/TANGO6/SBF2/PIWIL4/CD200/ZNF564/HELQ/FRYL/BACH2/GCNT1/PPFIBP1/TNRC6C/MAPK13/RASA1/ATP10D/LYST/TRPC1/CD40/ZNF154/BMP2K/ZNF711/SPEF2/ZNF135/ZNF780B/ZNF229/ZNF…
GSE21360_NAIVE_VS_SECONDARY_MEMORY_CD8_TCELL_UP	C7_immunologic	179	0.494725	2.23964	1.05139e-10	1.21517e-08	3648	tags=37%, list=17%, signal=31%	TNF/CP/CXCL1/CCL5/IL1RN/IER3/RAB20/BCL3/SH3BP5/HCAR2/SDC4/ZC3H12A/PEG10/HCK/GADD45B/EPHA4/NFKBIA/NFKBIE/PDE10A/VEGFA/CYBB/CD79A/CHI3L1/MARCKSL1/RAB11FIP1/ABCA1/CH25H/LAMA2/ELL2/CEBPB/DGAT2/AHR/IFITM2/TRAF1/TMSB4X/MET/TPI1/NFKB1/NFIL3/FHL3/SLC31A2/HERPUD1/ADAMDEC1/ETV5/PDE4B/DSC1/MIF/CSF3/PGAM1/ITGA8/SLC1A2/JMJD6/VASP/C3/FAS/DCSTAMP/EAF1/PPP1R14B/GPR18/SAMSN1/MRPL52/ME1/PRELID1/TES/TNFRSF10B/TUBB4B
GO_POSITIVE_REGULATION_OF_LEUKOCYTE_DIFFERENTIATION	C5_GO	157	0.510884	2.26879	1.14747e-10	1.32127e-08	2813	tags=31%, list=13%, signal=27%	ROR2/TNF/TNFSF9/LIF/CSF1/IL2RA/HLA-G/TESC/TRIB1/CD83/IL23A/IL12RB1/SOCS1/ZAP70/TNFSF11/BCL6/HLX/TYROBP/DUSP10/IL34/ANXA1/LEF1/SHH/RIPK2/GATA3/PRKCA/CCR1/EGR3/RARA/NFKBID/AXL/NLRP3/CD27/RUNX3/SOX4/ID2/FLT3LG/LILRB4/CCL19/TGFB1/ADAM8/ZFP36L1/TOX/KITLG/GLI2/IL17A/IL4/DCSTAMP/RHOA
HSIAO_HOUSEKEEPING_GENES	C2_curated	376	0.395862	1.94667	1.19784e-10	1.37413e-08	8369	tags=59%, list=39%, signal=37%	LGALS1/MARCKS/S100A10/CD3E/TRAF4/PDLIM1/PLP2/IFITM1/MT2A/NFKBIA/SLC6A8/JUNB/CHI3L2/EZR/ZFP36/UBC/CCR9/IQGAP1/ANXA2/CLIC1/TMSB4X/DDT/VIM/ACKR1/SLC25A6/BTG2/PIM1/TAGLN2/CFL1/LGALS3/ACTB/HLA-B/COX6A1/TMSB10/ISG20/CD63/EIF4G2/SLC25A5/PGAM1/ATF4/C1QBP/ALDOA/HSP90AA1/HLA-A/ACTG1/GAPDH/FAS/PSMB5/RHOA/YWHAH/ENO1/COX8A/PSMD7/PFN1/PSMB2/TXN/EIF3C/IRAK1/YBX1/POLR2L/HPN/SEC61B/UBB/GNAS/EIF1/RPS16/FLNA/COX4I1…
GSE360_HIGH_DOSE_B_MALAYI_VS_M_TUBERCULOSIS_DC_DN	C7_immunologic	198	0.475852	2.18214	1.20692e-10	1.37433e-08	2139	tags=28%, list=10%, signal=26%	MSC/DUSP5/CCL4/IL2RA/IL1RN/IL10RA/G0S2/ICAM1/F3/IER3/MMP9/TUBB2A/STX11/SERPINA1/CD83/S100A9/CCL2/LDLR/CCR7/SEMA6A/MT2A/S100A8/NR4A3/GADD45B/TIMP1/NFKBIA/CYP1B1/CD48/PLIN2/GAL/GBP1/SAT1/GBP2/CYBB/GCH1/BPI/MAP2K3/TNFAIP2/ELL2/CST7/CYP4B1/FCGR3A/MT1H/IFI6/PTGER4/MT1G/CHST2/RNF19B/TRAF1/KRTAP26-1/IFIT2/NFKB1/B3GNT2/RGS1/S100A11/MT1E
WIERENGA_STAT5A_TARGETS_UP	C2_curated	198	0.475822	2.182	1.20692e-10	1.37433e-08	2349	tags=31%, list=11%, signal=28%	CCL3/ADM/XIRP1/TNFRSF4/CXCL8/CCL5/CXCL10/DUSP5/PHLDA1/IL4I1/SPP1/PLEKHH3/TRIB1/CD83/PLAU/HSPA2/LTB/CCL2/CCR7/CTXN1/ADGRG5/GADD45B/COL6A1/PLIN2/CSF2/KLF2/GPR65/PRDM8/SNTA1/BHLHE40/FCGR2A/ABCA1/KLF6/CH25H/NTSR1/HSPA6/DHRS3/TNFAIP8L3/CST7/CD1B/FCER2/ST3GAL5/TRAF1/PLVAP/CD1A/IL18RAP/UPK1A/NFIL3/DDIT4/CCL22/RGS1/STAP1/PCSK9/BTG2/PIM1/TTLL7/IGFBP5/ENC1/TMEFF2/PGM2L1/OSM
MODULE_60	C4_computational	411	0.388163	1.93118	1.42e-10	1.61102e-08	2289	tags=23%, list=11%, signal=21%	ROR2/RRAD/PRF1/WT1-AS/GSTM1/CCL5/HBEGF/TCF7/FEZ1/TPSAB1/G0S2/IER3/TRIB1/ITGB7/ECE1/COL6A2/COL1A2/PLAU/NKG7/FBLN2/LTB/CCL2/CD3E/HPGD/PRG2/CKM/LRRC32/DLK1/KCNH2/ISG15/COL6A1/CCND1/SLC6A8/TST/LCK/APOE/CDKN1A/CRYAB/NR5A1/FGR/FEV/FCER1G/VEGFA/RAMP1/EEF1A2/CD79A/APOC1/ADGRE5/CCR1/RHOB/HMOX1/ABCA1/EMP3/MAP2K3/CORO1A/FPR2/CDC42EP1/TNFAIP2/ITGB5/SLC29A1/ACTC1/TRPM2/LSP1/DHRS3/IGFBP6/CST7/NECTIN2/LST1/CRAB…
THEILGAARD_NEUTROPHIL_AT_SKIN_WOUND_UP	C2_curated	76	0.625461	2.45984	1.47582e-10	1.66822e-08	1984	tags=34%, list=9%, signal=31%	TNF/CCL3/CXCL8/CXCL3/HCAR3/IER3/TRIB1/PLAU/AQP9/CXCL2/CCL2/BCL2A1/UPP1/GPR65/VEGFA/EGR3/MAP2K3/KLRG1/ZFP36/ETS2/AHR/HMGA1/HIVEP1/NFKB1/SLC25A6/MTHFD2
GO_REGULATION_OF_IMMUNE_RESPONSE	C5_GO	965	0.311915	1.65203	1.49466e-10	1.68334e-08	3337	tags=22%, list=15%, signal=20%	TNF/CD276/CD96/CCL5/IL2RA/SH2D1A/IL1RL1/HLA-G/ICAM1/TREM1/ITGB7/CLCF1/LAX1/IL23A/RELB/COL1A2/CD300E/IRF4/IL6/NCR3/PDCD1/IGKC/FCN1/LTA/HCST/IL12RB1/PYHIN1/CD177/CD28/ZC3H12A/TRAT1/CCR7/CD3E/FOXJ1/XCL1/IFITM1/SOCS1/ZAP70/NR4A3/HCK/BCL6/HLX/TYROBP/DUSP10/TNFAIP3/HAVCR2/ANXA1/TBX21/CRTAM/LCK/GPR31/CD48/APOE/CLEC2B/TNFRSF13C/GBP5/MUC4/STAT1/SEMA7A/RIPK2/FGR/GATA3/IGLV1-40/GBP1/FCER1G/C5AR1/CD79A/SUSD4…
GOLDRATH_ANTIGEN_RESPONSE	C2_curated	344	0.40749	1.97948	1.51577e-10	1.70092e-08	4772	tags=33%, list=22%, signal=26%	CCL3/IRF8/PRF1/LGALS1/CCL5/IL2RA/TNFRSF9/JCHAIN/CXCR3/IER3/S100A10/IRF4/PDCD1/IL12RB1/HSPA2/BCL2A1/PLP2/GADD45B/SLC2A3/MYL4/TYROBP/BAG3/ANXA1/CD48/ITGAX/LMNA/ALAS2/BHLHE40/F2RL3/CD68/IFI30/PRDM1/CCDC50/EMP3/MAP2K3/KLRG1/ELL2/MYADM/ACOT7/EFHD2/KPNA2/PCLAF/ANXA2/RELL1/AHNAK/ID2/CCL4L2/PTGER4/PGLYRP1/PLK4/GEM/PSMC3IP/ROM1/IL18RAP/TPI1/NFIL3/NEK2/LILRB4/DTL/MTHFD2/PIM1/S100A11/CLIC4/ADAM8/GZMB/TPM4/L…
GO_HUMORAL_IMMUNE_RESPONSE	C5_GO	342	0.408693	1.98704	1.88838e-10	2.11136e-08	6307	tags=43%, list=29%, signal=31%	TNF/CXCL8/CXCL1/CXCL3/CXCL10/SH2D1A/JCHAIN/TREM1/BCL3/CD83/GPR183/IL6/PDCD1/IGKC/FCN1/LTA/S100A9/CXCL2/CCL2/CD28/CCR7/S100A12/FOXJ1/S100A8/PRTN3/CXCL11/IL36RN/GATA3/REG3G/IGLV1-40/C5AR1/SUSD4/MNX1/AZU1/CXCL9/BPI/RNASE6/C3AR1/TRBC2/KRT1/EBI3/WFDC5/RGCC/TRDC/CFD/PLA2G2A/MFAP4/FCER2/IFNA7/IGKV1-5/PGLYRP1/SPINK5/MBL2/HTN1/MASP1/CFHR1/C1S/IGHV2-26/CPB2/IGLL1/PGLYRP4/IFNA10/IGLV6-57/IGKV5-2/IFNA5/CFHR5…
GSE16755_CTRL_VS_IFNA_TREATED_MAC_DN	C7_immunologic	191	0.475551	2.16831	1.93288e-10	2.15332e-08	2806	tags=30%, list=13%, signal=26%	MSC/TNFSF9/CXCL10/DUSP5/PDGFA/IL2RA/MARCKS/IL10RA/ICAM1/STX11/IL6/SDC4/CXorf65/GFPT2/ZC3H12A/IFITM1/ISG15/IER5/SERPINB2/NFKBIA/CDKN1A/PTGS2/CXCL11/GBP5/GBP1/GBP2/PELI1/SYT12/SLC5A10/BASP1/IDO2/ELL2/EBI3/LRP12/SLC2A6/IRF1/NECTIN2/TEX30/SOCS3/KIF12/HAPLN3/ABTB2/RNF19B/TRAF1/C4orf46/SLC31A2/OSGIN2/ATP2B1/AKIRIN2/ELF4/MAD2L1BP/ASH1L-AS1/CMPK2/MASTL/MIR3945HG/FAS/TICAM1
GSE32986_UNSTIM_VS_GMCSF_AND_CURDLAN_HIGHDOSE_STIM_DC_DN	C7_immunologic	190	-0.497367	-2.20942	1.96871e-10	2.18533e-08	4638	tags=45%, list=21%, signal=36%	VWA8/RNPC3/CA5B/APBB1IP/ZDHHC17/GLG1/TSGA10/MBTD1/ABCF3/ERCC6L2/FBXO3/WDR91/ZNF419/RSAD1/MBD5/ADGRL1/PWWP2A/CTC1/ACAD10/SORBS3/PRKAG2/LINS1/LLGL2/MALAT1/LINC00339/SERINC5/KDM8/APPL2/LUC7L/PLCG1/SUMF1/NEK9/SLC38A6/PLA2G6/DENND4C/MPP7/SIN3B/SLC46A3/ABCC10/TCEA3/RGS14/PATJ/MFSD3/TMEM63A/OVGP1/C5/CSAD/ZNF280D/ENGASE/FAM120C/NKTR/LRIG2/TTYH2/KIZ/ZNF83/TBCEL/ZNF623/ZBTB38/MAPK13/SLC6A16/CFAP44/ZBTB20/Z…
GSE21670_STAT3_KO_VS_WT_CD4_TCELL_IL6_TREATED_DN	C7_immunologic	198	-0.492077	-2.19967	2.05774e-10	2.27598e-08	3176	tags=36%, list=15%, signal=31%	PALLD/USP54/CDK10/PER3/TTC39B/GKAP1/ABHD18/PTGS1/PHLDB2/DIP2C/ITGA2B/ITSN1/EHBP1/CPNE8/COL4A2/TSC1/MBLAC2/LDLRAP1/MICU3/FRYL/SCARF1/PKIA/FRY/TGM2/ENO2/TRPC6/NFE2/CALML4/WBP1L/CDCP1/MMRN1/METTL7A/ANKRD63/IFT43/C9orf152/ADAM22/MED12L/PDZK1IP1/RASSF6/MYOM1/SMUG1/PAFAH2/ITGB3/PABPC4L/PODXL/ICK/HSD3B7/COL4A1/FAM110B/PRKG1/FSTL1/CAPS2/FAM174B/LYSMD1/CBR3/DSG2/ZFP2/NBEA/FCER1A/LRRC36/PLSCR4/PLXDC2/SRGAP…
HADDAD_T_LYMPHOCYTE_AND_NK_PROGENITOR_DN	C2_curated	63	0.661743	2.51318	2.09864e-10	2.31293e-08	1443	tags=52%, list=7%, signal=49%	TNF/CCL3/IRF8/LGALS1/CD7/JCHAIN/G0S2/ITGB7/GPR183/CEBPD/LTB/MPO/CCR7/TRAF4/S100A8/HCK/RAB31/TYROBP/PRTN3/LEF1/LY86/TRIB2/SERPINF1/AZU1/SPON1/MS4A3/RNASE6/CSF1R/CSTA/CST7/CCR9/TSPOAP1/CFD
GSE18791_CTRL_VS_NEWCASTLE_VIRUS_DC_2H_DN	C7_immunologic	169	0.490482	2.19203	2.15372e-10	2.36518e-08	3702	tags=38%, list=17%, signal=32%	TNF/TPSD1/CXCL10/HCAR3/CCNA1/STAR/PMAIP1/CREB5/PRG2/MIR22HG/NR4A3/GADD45B/ISG15/RGS2/KBTBD8/METRNL/PTGS2/IRAK2/PIM3/LINC02112/PELI1/RHOB/AREG/RAB11FIP1/NFKBID/CSRNP1/INSL3/MAK/IRF1/IFIT3/B3GNT5/NR4A1/MFAP4/PTGER4/RSPH9/HOMER1/TRAF1/GEM/IFIT2/NACA2/TMEM217/ZBTB43/IRF7/SLC22A4/PDE4B/OSM/SAMD5/CDR1/MIA2/HTN3/PPP2R3B/PCDHGA8/SNAP91/DNAJB1/MX1/FGF9/MXD1/NAMPT/CT83/PHF13/PCDHAC2/FBXO34/MAP3K20-AS1/IFNB1
WALLACE_PROSTATE_CANCER_RACE_UP	C2_curated	284	0.425434	2.03086	2.32806e-10	2.54758e-08	3337	tags=32%, list=15%, signal=27%	IRF8/PRF1/CCL5/CCL4/DUSP2/IL10RA/JCHAIN/HLA-G/MXRA7/FBN2/MMP9/CD83/GPR183/NKG7/CEBPD/IGKC/GADD45G/CD28/ARL4C/TRAT1/CCR7/BCL2A1/CD69/IFITM1/SOCS1/ZAP70/MMP19/NR4A3/IL2RG/ISG15/CCND1/LCK/CD48/APOE/TMEM158/STAT1/GPR65/GBP1/FCER1G/C5AR1/ADGRE5/SLAMF1/CD3D/CXCL9/CORO1A/RNASE6/TRBC2/SLC7A5/LSP1/THBD/CD27/RUNX3/ETS2/IRF1/IFIT3/COTL1/IFI6/PIM2/IFITM2/TAP1/ITGB2/HMGCS2/NFIL3/ALOX5AP/CCL19/RGS1/STAP1/PTGDS…
GO_REGULATION_OF_INFLAMMATORY_RESPONSE	C5_GO	354	0.402091	1.95752	2.38358e-10	2.59911e-08	2806	tags=25%, list=13%, signal=23%	TNF/CCL3/CCL5/BCL6B/IL2RA/IL1RL1/MMP9/IL23A/IL6/LILRA5/LTA/S100A9/SERPINE1/LDLR/CD28/ZC3H12A/CCR7/S100A12/XCL1/CD6/S100A8/HCK/GPER1/F12/TNFSF11/BCL6/CLEC7A/DUSP10/NFKBIA/TNFAIP3/ANXA1/CNR2/GPR31/METRNL/APOE/PTGS2/GBP5/SEMA7A/GATA3/FCER1G/SERPINF1/GHRL/CASP5/FPR2/MMP26/BIRC3/KRT1/APOA1/NLRP3/NT5E/CST7/CEBPB/SOCS3/TLR7/TNFRSF1B/PLA2G2A/ADCYAP1/PTGER4/FFAR4/IGF1/TLR9/TNFAIP6/PGLYRP1/EGFR/DUOXA2/TMSB…
GSE9509_LPS_VS_LPS_AND_IL10_STIM_IL10_KO_MACROPHAGE_30MIN_UP	C7_immunologic	183	-0.500628	-2.2111	2.39595e-10	2.6034e-08	4846	tags=44%, list=22%, signal=34%	SDSL/HSD17B12/IDS/RBPMS/STK36/DUSP3/TBXAS1/RAB27B/TNRC18/DEPTOR/NYNRIN/C1RL/HOOK1/KIT/MAP7/PYGL/NPR3/ROBO3/GATAD1/FGD5/ANGPT1/ADAM28/LINC00667/IMPA2/TAL1/TMEM42/SNTB1/MPIG6B/FOCAD/MAST4/PROM1/MTG2/IQGAP2/ARHGAP22/PRKAG2-AS1/CD164/RNF150/TRIP10/NOTCH4/BNIP3/CALN1/MKKS/ELOVL7/GPR27/PAAF1/PIP5K1B/FRY/ADAMTSL4/WDR35/IL6R/C11orf21/SLC22A15/MMRN1/GALK2/GSTO2/TESPA1/HOXA3/CTDSPL/BRSK2/STON2/SPIN3/JAM2/S…
WP_SPINAL_CORD_INJURY	C2_curated	116	0.55617	2.35552	2.40618e-10	2.60534e-08	2813	tags=40%, list=13%, signal=35%	TNF/CXCL8/CXCL1/CXCL10/NTN1/ICAM1/MMP9/NGFR/IL6/LTB/CXCL2/CCL2/SEMA6A/EPHA4/CCND1/ANXA1/PTGS2/PRKCA/FCGR2A/RHOB/NOX4/LILRB3/BDNF/ZFP36/E2F1/GADD45A/PLA2G2A/NR4A1/NCAN/EGFR/VIM/SOX9/PRB1/TGFB1/BTG2/RTN4/PTPRZ1/SLIT2/ROS1/LGALS3/GFAP/MIF/IL4/KLK8/MAG/RHOA
MIR4768_5P	C3_motif	322	-0.427152	-2.01819	2.5418e-10	2.74257e-08	3494	tags=34%, list=16%, signal=29%	PSD3/SLC12A6/RPS6KA6/ATP6V1C1/SPOP/MBOAT2/TRAK2/CHD9/ZNF701/NFIX/RIN2/SCAI/ZNF761/SLAIN1/C22orf46/PURA/TMEM245/REEP3/DTNA/SLC8A3/SLC4A8/DLG3/SIRT3/ZNF189/SOBP/SYNJ2BP/TNRC6B/PDK3/ZSWIM6/ZNF90/ZNF544/SH3PXD2A/IL20RB/PLXNA2/ZSCAN22/LTN1/ZNF558/RTN4RL1/ZNF117/GALNT15/ZNF730/ZNF420/ZNF813/ZNF302/FANCL/GCLM/ZNF816/CDON/KRIT1/CADM2/CYB561D2/PIP5K1B/ZNF713/ZNF559-ZNF177/BCL11A/HLA-DOA/DCP1B/ZNF138/TBCEL…
MODULE_76	C4_computational	81	0.610851	2.42774	2.6001e-10	2.7957e-08	3497	tags=46%, list=16%, signal=38%	CCL3/PTX3/CXCL8/CXCL1/CXCL10/NFATC4/CCL4/IL1RAP/S100A9/CXCL2/CCL2/S100A12/BCL6/ANXA1/LY86/PTGS2/CXCL11/CYBB/CCR1/FPR1/CXCL9/FPR2/C3AR1/CEBPB/NFKB1/ALOX5AP/CCL19/BDKRB2/PLA2G7/CCL18/TLR2/C3/ORM1/LYZ/CXCL13/ADORA2A/AIF1
GSE9650_NAIVE_VS_MEMORY_CD8_TCELL_DN	C7_immunologic	193	0.473143	2.15683	2.70891e-10	2.90258e-08	3222	tags=30%, list=15%, signal=25%	PRF1/LGALS1/CD7/CCL5/CCL4/SH2D1A/IL10RA/CXCR3/ITGB7/S100A10/AQP9/TNNI1/BCL2A1/GADD45B/TNFAIP3/ANXA1/CRTAM/SH2D2A/ITGAX/FGR/GATA3/BHLHE40/KLF6/KLRG1/MNS1/ELL2/CST7/UBC/ACOT7/CD160/EFHD2/NFKBIB/ANXA2/TNFRSF1B/AHNAK/ID2/PTTG1/RNF19B/PGLYRP1/IL18RAP/PIM1/S100A11/FRMD5/GZMB/KITLG/FGF19/PGAM1/DAPK2/HLA-A/CTSW/ODC1/TXN/LYPLA2/HMGB2/EMP1/POLR2L/MYO1F
GSE28726_NAIVE_VS_ACTIVATED_NKTCELL_DN	C7_immunologic	198	0.470969	2.15975	2.75748e-10	2.9444e-08	3185	tags=26%, list=15%, signal=22%	STX1A/DUSP5/HBEGF/CCL4/PLPP1/IER3/TUBB2A/IL1RAP/ATF3/EGR2/BCL2A1/PLP2/RRAS2/SH2D2A/RIPK2/EGR3/S1PR1/SPRY1/SPON1/MAP2K3/KLRG1/EZR/SLC7A5/CDC42EP3/NECTIN3/TEX30/RHOG/TNFRSF1B/ICOS/AHR/TRAF1/CLIC1/GEM/IL18RAP/NFKB1/RGS10/MTHFD2/ATP2B1/ELF4/GNG5/GNAI1/BCL2L11/EIF4G2/PGAM1/ACTG1/PSMD9/PSMB5/PSMD7/CYTIP/EEF1E1/HSBP1
MARTENS_TRETINOIN_RESPONSE_UP	C2_curated	805	0.322651	1.68909	2.93485e-10	3.12298e-08	4235	tags=31%, list=19%, signal=26%	XIRP1/RRAD/IGLON5/CXCL3/LIF/CSF1/ASB2/HIC1/IL10RA/G0S2/TNNI2/ICAM1/SERPINA1/IL2RB/ARSI/NEUROG3/PDCD1/NKG7/LILRA5/TRH/S100A9/HSPA2/AQP9/CD248/CCL2/GFPT2/CFAP126/LFNG/TSKU/SLC6A19/EMX1/S100A8/RND1/COL6A1/TTLL8/STRA6/CHAC1/NEUROG2/MCEMP1/GPR31/CD5/SOX8/MUC4/FGR/MAFB/WNT11/REG3G/FSD1/EEF1A2/HMCN2/ZMYND15/CD79A/APOC1/SCUBE1/F2RL3/CDH24/CHI3L1/CCR1/EGR3/MNX1/ZG16B/PLK2/CAMK2A/FAM187B/CCDC185/TMEM155/SL…
GSE14769_UNSTIM_VS_120MIN_LPS_BMDM_DN	C7_immunologic	200	0.468801	2.15301	3.04774e-10	3.22378e-08	2689	tags=30%, list=12%, signal=26%	HBEGF/CSF1/DUSP2/IL1RN/TNFRSF12A/SLC15A3/IRF4/SDC4/CXCL2/ATF3/SERPINE1/EGR2/BCL2A1/CD69/MT2A/ISG15/BCL6/GPR174/PLAUR/FILIP1L/PCDH7/IRAK2/CSF2/BHLHE40/EGR3/AREG/IER2/MAP2K3/PTH1R/CLEC4D/CSRNP1/ZFP36/NLRP3/ELL2/GPR132/EBI3/PDGFB/IRF1/EDN1/AHNAK/ID2/C15orf48/SLC3A2/HIVEP1/NFIL3/B3GNT2/SLC31A2/BTG2/TIPARP/CLIC4/HERPUD1/HLA-B/SDE2/IL10/MAPK6/VASP/GTF2B/C3/HIF1A
MODULE_27	C4_computational	351	0.401814	1.95438	3.05046e-10	3.22378e-08	3324	tags=34%, list=15%, signal=29%	ROR2/TNFRSF4/CD96/HCAR3/HBEGF/IL2RA/IL10RA/ROR1/HLA-G/ICAM1/F3/ITGB7/GPR183/NGFR/IL1RAP/IL2RB/IL12RB1/CCL2/LDLR/ADRA2B/SFRP4/GHRHR/CD69/CHRNA3/CD6/IL2RG/LGALS3BP/TNFSF11/EPHA4/PLAUR/CNR2/ADRB1/CDKN1A/CD5/ITGAX/GPR65/GLYAT/FCER1G/PRKCA/TRIB2/PTPRH/C5AR1/CD79A/FCGR2A/CCR1/SLAMF1/GPRC5A/CD3D/FCAR/FPR1/RARA/PTH1R/FPR2/C3AR1/NTSR1/ITGB5/LILRB3/AXL/CHRNB2/GABRP/LILRA1/THBD/CD27/MYOC/S1PR2/FCGR3A/CCR9/O…
WINZEN_DEGRADED_VIA_KHSRP	C2_curated	97	0.589889	2.42034	3.10004e-10	3.26499e-08	1838	tags=35%, list=8%, signal=32%	TNF/CXCL8/CXCL3/INHBA/CXCL10/DUSP5/HBEGF/SPRY4/PDGFA/HAS2/PMAIP1/F3/GPR183/IL23A/IL6/SDC4/CXCL2/SDC2/PTHLH/CYP24A1/PLAUR/PTGS2/CXCL11/CSF2/SPRY2/IRS1/BDNF/ZFP36/EDN1/ID2/PTGER4/GEM/IFIT2/B3GNT2
RPS14_DN.V1_UP	C6_oncogenic	186	0.482406	2.19661	3.22724e-10	3.3874e-08	2146	tags=33%, list=10%, signal=30%	CXCL8/PDGFA/CCNA1/TNFRSF9/MARCKS/KYNU/SPP1/FBN2/GPR183/IL1RAP/PLAU/SH3BP5/NKG7/SDC4/CCL2/ARL4C/BCL2A1/CD69/NR4A3/HCK/RAB31/BCL6/CLEC7A/TYROBP/PRTN3/CYP1B1/CRTAM/LY86/SH2D2A/CDKN1A/CLEC2B/RGL1/ITGAX/EGR3/AZU1/PLK2/RHOB/C3AR1/TNFRSF10C/TNFAIP2/BIRC3/CSTA/CDC42EP3/LINC00461/PRG3/LST1/NCF2/DCN/PTGER4/ITGB2/TIGAR/SLC31A2/PDE4D/LPXN/PTGDS/PLA2G7/ITGAM/MNDA/ADAMDEC1/P2RY14/ANKRD1
STK33_SKM_UP	C6_oncogenic	247	0.442421	2.07713	3.42817e-10	3.58157e-08	2133	tags=29%, list=10%, signal=26%	TNF/DUSP8/ADM/LGALS1/DUSP5/HBEGF/PHLDA1/ASB2/CCL4/IL10RA/TFPI2/TRIB1/SOWAHC/BCL3/GPR183/PLAU/CREB5/SGK1/LFNG/BCL2A1/SIPA1L2/MIR22HG/RGS2/TYROBP/NFKBIA/ANXA1/JUNB/CDKN1A/UPP1/C20orf197/MILR1/GPR65/FGR/MAFB/OLIG1/KCNJ2/GBP2/CYBB/BMF/C5AR1/PLK2/RHOB/HMOX1/EMP3/KLF6/TNFAIP2/MNS1/CYTH4/ZFP36/THBD/GPR132/IRF1/SH2B3/RGCC/MPEG1/NCF2/RNF19B/CLDN1/MIDN/ARRDC3/ARL5B/CMTM3/TP53INP1/CFL2/LPXN/RGS1/BTG2/DNAJB4…
GSE32164_RESTING_DIFFERENTIATED_VS_CMYC_INHIBITED_MACROPHAGE_DN	C7_immunologic	195	0.47893	2.19348	3.43545e-10	3.58157e-08	3447	tags=27%, list=16%, signal=23%	TNFRSF18/CD96/PRF1/CCL5/CXCL10/TCF7/JCHAIN/ICAM1/S100A10/SOAT2/DOK2/CD6/LCK/SH2D2A/PLIN2/CD5/GPR65/GATA3/PRDM1/CSF1R/KLRG1/CD27/CTSV/FDX1/IFIT3/ID2/PTTG1/PTGER4/ITM2A/TRAF1/VMP1/FLT3LG/IFIT2/IL18RAP/MTHFD2/PIM1/TIMM23/TMEM176B/CD82/ITM2C/ALDOA/FAS/ENO1/SEPHS2/EBP/SULF2/NABP1/PHPT1/HPN/TUFM/PPP4C/TES
FULCHER_INFLAMMATORY_RESPONSE_LECTIN_VS_LPS_UP	C2_curated	558	0.347186	1.77377	3.63795e-10	3.77992e-08	2675	tags=22%, list=12%, signal=19%	CD276/TNFRSF4/CXCL8/TNFSF9/CXCL1/CXCL3/INHBA/NRIP3/HCAR3/HBEGF/CSF1/PHLDA2/CCNA1/TNFRSF9/IL1RN/PMAIP1/TREM1/SPP1/F3/TUBB2A/SOWAHC/IL1RAP/IRF4/PLAU/IL6/SH3BP5/CXCL2/SDC2/GADD45G/DUSP4/LRRC32/MMP19/NR4A3/BHLHE41/IL2RG/RAB31/COL6A1/CLEC7A/SERPINB2/PLAUR/MCEMP1/NFKBIE/TUBB6/SEMA7A/GAL/EPOP/RHBDD2/PRKCA/CYBB/FCGR2A/FXYD6/FCAR/MARCKSL1/RAB11FIP1/PDLIM4/ADTRP/PPP1R14A/NQO1/MRPS24/BIRC3/HSPA6/LSP1/THBD/M…
DURANTE_ADULT_OLFACTORY_NEUROEPITHELIUM_CD8_T_CELLS	C8_cellSignature	71	0.62948	2.42814	3.66971e-10	3.79273e-08	3750	tags=58%, list=17%, signal=48%	CD96/CD7/CCL5/CCL4/DUSP2/NKG7/HCST/ARL4C/SYTL3/CD3E/CD69/IL2RG/TNFAIP3/LCK/CD48/CD3D/CORO1A/TRBC2/LSP1/RUNX3/CST7/ID2/CCL4L2/PTGER4/SH3BGRL3/TMSB4X/ALOX5AP/RGS1/CD8A/TRGC2/TSC22D3/CTSW/CD52/CYTIP/CKLF/LCP1/SAMSN1/STK17B/GZMM/TRAC/TAGAP
GSE22886_NAIVE_BCELL_VS_MONOCYTE_DN	C7_immunologic	193	0.470902	2.14662	3.67487e-10	3.79273e-08	3555	tags=31%, list=16%, signal=26%	LGALS1/IL10RA/BCL3/SERPINA1/S100A10/S100A9/SGK1/S100A12/S100A8/HCK/RAB31/CLEC7A/TYROBP/ADAP1/ANXA1/MAFB/FCER1G/C5AR1/FCGR2A/IFI30/SLC16A6/TNFAIP2/NEU1/LILRB3/CSTA/CDC42EP3/EFHD2/CEBPB/RHOG/ANXA2/TNFRSF1B/ID2/NCF2/TPI1/SLC31A2/VIM/RTN4/S100A11/ITGAM/MNDA/MICAL2/LGALS3/PRKCD/LY96/LILRB1/TLR2/VASP/ALDOA/CKAP4/GAPDH/CD93/PTPRE/CKLF/SLC7A7/MYO1F/TKT/LYZ/NOD2/LILRA2/TNFRSF10B
GO_GTPASE_REGULATOR_ACTIVITY	C5_GO	295	-0.431975	-2.01965	3.72507e-10	3.83173e-08	4853	tags=36%, list=22%, signal=28%	NPRL3/DOCK5/SIPA1L3/EVI5L/RACGAP1/RAP1GAP/RALGAPA2/DEPDC1/PLXNB1/NPRL2/ARHGAP20/AGAP6/STARD8/RUNDC3A/ARHGAP39/RABEP1/ARHGEF19/SRGAP1/RGS6/RGPD5/RGPD4/OCRL/ARAP1/RGPD3/AGAP2/ARHGAP5/RASA4/PREB/RALGAPA1/RAPGEF2/TBC1D16/AGAP4/ARHGAP28/RGS11/LLGL2/SGSM3/MYO9A/ARHGAP25/AGAP5/RIN2/RALGAPB/OPHN1/RAP1GAP2/FLCN/RGS17/TBC1D2B/RAB3GAP2/TBC1D17/EVI5/PCP2/RGS14/RGS3/IQGAP2/TBC1D24/ARHGAP22/GRTP1/ARHGEF15/TBC1…
GAURNIER_PSMD4_TARGETS	C2_curated	69	0.639089	2.46872	4.49952e-10	4.61298e-08	2757	tags=42%, list=13%, signal=37%	TNF/CCL3/CXCL8/CXCL1/CXCL3/CCL5/CXCL10/HLA-G/IL21R/RELB/IL6/IL12RB1/CXCL2/CCL2/CCR7/CXCL11/C5AR1/CCR1/CXCL9/C3AR1/NFKB2/NFKB1/CCL19/TGFB1/HLA-B/IL10/CCL18/C3/HLA-A
GO_TAXIS	C5_GO	632	0.339561	1.74568	4.62964e-10	4.73066e-08	3240	tags=27%, list=15%, signal=24%	CCL3/CXCL8/CXCL1/CXCL3/CCL5/CXCL10/THBS1/HBEGF/CSF1/CCL4/PDGFA/FEZ1/NTN1/CXCR3/ADGRA2/F3/GPR183/NGFR/IL23A/PLAU/IL6/PLXNA1/S100A9/CXCL2/PROK2/CCL2/PLEKHG5/SERPINE1/CCR7/SEMA6A/S100A12/EGR2/PLP2/DOK2/XCL1/S100A8/NTRK1/NR4A3/TNFSF11/LHX9/EPHA4/PLAUR/EFNA5/IL34/ANXA1/CNR2/LEF1/CCR4/CXCL11/SHH/SPTBN2/SEMA7A/GATA3/FCER1G/PRKCA/EDN3/VEGFA/C5AR1/HOXB9/FOSL1/CCR1/EGR3/AZU1/S1PR1/RELN/FPR1/DYSF/CXCL9/CORO…
GO_REGULATION_OF_MAPK_CASCADE	C5_GO	703	0.328392	1.70667	4.72131e-10	4.80842e-08	2437	tags=20%, list=11%, signal=18%	ROR2/TNF/CCL3/DUSP8/LIF/CCL5/DUSP5/THBS1/SPRY4/CCL4/PDGFA/IL11/DUSP2/ROR1/ICAM1/TRIB1/GPR183/LAX1/IL6/LILRA5/FZD8/PROK2/CCL2/ATF3/GPBAR1/GADD45G/ZC3H12A/CCR7/SEMA6A/DUSP4/S100A12/ADRA2B/TRAF4/XCL1/NTRK1/GADD45B/GPER1/TENM1/RGS2/TNFSF11/EPHA4/DUSP10/MAP3K8/IL34/HAVCR2/APOE/SH3RF3/IRAK2/FGF21/SEMA7A/RIPK2/SPRY2/GBP1/FAM83D/PRKCA/EDN3/VEGFA/TRIB2/C5AR1/CHI3L1/CCR1/SLAMF1/APELA/FPR1/RELL2/SPRY1/GHRL/…
ZHONG_PFC_MAJOR_TYPES_MICROGLIA	C8_cellSignature	423	0.374474	1.86597	5.11331e-10	5.19051e-08	3779	tags=30%, list=17%, signal=26%	CCL3/IRF8/CCL4/IL10RA/SLC15A3/SPP1/IER3/SERPINA1/CD83/GPR183/OLFML3/CEBPD/HCST/SGK1/ACY3/EGR2/SIPA1L2/NINJ1/BHLHE41/HCK/GADD45B/RGS2/RAB31/C12orf75/TYROBP/CCND1/NFKBIA/HAVCR2/LY86/APOE/JUNB/LPAR5/KLF2/ITGAX/MILR1/IGFLR1/HPGDS/FCER1G/SAT1/CYBB/SERPINF1/C5AR1/APOC1/FCGR2A/CCR1/EGR3/CRYBB1/CD68/RHOB/IFI30/FPR1/KLF6/IER2/CORO1A/RNASE6/CH25H/C3AR1/NEU1/CSF1R/SLC29A1/AXL/CYTH4/ZFP36/DHRS3/ATP2B1-AS1/PD…
BROCKE_APOPTOSIS_REVERSED_BY_IL6	C2_curated	145	0.508333	2.21456	5.29712e-10	5.35947e-08	2528	tags=30%, list=12%, signal=27%	DUSP5/HBEGF/MARCKS/ICAM1/SPP1/BCL3/IRF4/SGK1/CCL2/LDLR/SOCS1/HCK/GADD45B/SLC2A3/BCL6/MAP3K8/JUNB/SH2D2A/STAT1/BHLHE40/PRDM1/CADPS/IER2/SLC16A6/LTBP1/ZFP36/ELL2/GADD45A/IRF1/CEBPB/PTP4A1/MT1H/SOCS3/SOX2/PIM2/ID2/PIM1/MAFF/TPM4/PTP4A3/MAPKAPK2/BCL2L11/MAP1B/AMPD1
GO_POSITIVE_REGULATION_OF_LEUKOCYTE_CHEMOTAXIS	C5_GO	94	0.574696	2.33614	5.41624e-10	5.44944e-08	3295	tags=39%, list=15%, signal=34%	CCL3/CXCL8/CCL5/CXCL10/THBS1/CSF1/CCL4/IL23A/IL6/SERPINE1/CCR7/XCL1/IL34/EDN3/VEGFA/C5AR1/CCR1/DYSF/FPR2/C3AR1/CSF1R/PGF/EDN1/PRSS56/CCL19/CALR/AKIRIN1/PLA2G7/C1QBP/IL4/DAPK2/RARRES2/WNT5A/CAMK1D/CXCL17/LGALS9/CXCL13
GSE42021_TCONV_PLN_VS_TREG_PRECURSORS_THYMUS_DN	C7_immunologic	199	0.469345	2.15214	5.42136e-10	5.44944e-08	2870	tags=29%, list=13%, signal=25%	EIF1AY/TNFSF9/GPR3/PDGFA/DDX3Y/IL1RN/ICAM1/SOWAHC/BCL3/RELB/CEBPD/CXCL2/SERPINE1/BCL2A1/SOCS1/SERPINB2/MAP3K8/PLAUR/JUNB/CDKN1A/PTGS2/SERTAD1/BHLHE40/GCH1/PELI1/RHOB/MARCKSL1/CXCL9/IER2/MSR1/LTBP1/TNFAIP2/GBP7/CLEC4D/NFKB2/BIRC3/MYADM/ETS2/CEBPB/NFKBIB/SOCS3/RNF19B/GLIPR2/HIVEP1/NFKB1/NAB2/PIM1/HERPUD1/IL10/ACOD1/HSPA5/VASP/HIF1A/LCN2/HSP90AA1/RIOK3/MAPRE1
GSE15330_LYMPHOID_MULTIPOTENT_VS_MEGAKARYOCYTE_ERYTHROID_PROGENITOR_IKAROS_KO_DN	C7_immunologic	173	0.482964	2.16361	5.49162e-10	5.50214e-08	3640	tags=32%, list=17%, signal=27%	CCL3/PRF1/LGALS1/CCL5/DUSP5/PHLDA1/CCL4/CXCR3/PMAIP1/S100A10/NKG7/S100A9/S100A8/ANXA1/TBX21/CD48/ITGAX/BHLHE40/PRDM1/MARCKSL1/CCDC50/KLRG1/NCALD/MYADM/ACOT7/EFHD2/NFKBIB/TIGIT/AHNAK/ID2/NR4A1/PGLYRP1/GEM/IL18RAP/NFIL3/LILRB4/RGS1/S100A11/CLIC4/GZMB/CD63/DAPK2/GAPDH/PCGF2/GMDS/TXNDC17/MYO1F/GABARAPL1/CRIP1/CYSLTR2/DDX28/GGH/AIF1/CD80/SPTY2D1
GO_CELL_CELL_ADHESION	C5_GO	858	0.314542	1.65697	5.83115e-10	5.81504e-08	3595	tags=26%, list=17%, signal=23%	TNF/CD276/ZNF703/TNFSF9/LGALS1/CLECL1/CCL5/FOXA1/IL2RA/IL1RN/NTN1/HAS2/HLA-G/ICAM1/CD70/ITGB7/CD83/LAX1/IL23A/IL1RAP/IL6/PDCD1/S100A9/IL12RB1/LRRC4/SDC4/WNT1/CCL2/CD177/CNN3/CD28/ZC3H12A/CCR7/CD3E/PDLIM1/FOXJ1/XCL1/SOCS1/CLDN6/ZAP70/LRRC32/CD6/S100A8/NR4A3/TENM1/TNFSF11/BCL6/HLX/DSG4/DUSP10/PKP3/MAP3K8/PLAUR/CYP1B1/EFNA5/HAVCR2/ANXA1/TBX21/CRTAM/PCDH7/LEF1/LCK/CD5/SHH/TNFRSF13C/CDH12/ITGAX/MILR1/…
GSE42021_TREG_PLN_VS_CD24INT_TREG_THYMUS_UP	C7_immunologic	199	0.468632	2.14887	5.84161e-10	5.81504e-08	3701	tags=32%, list=17%, signal=27%	EIF1AY/TNFSF9/PDGFA/DDX3Y/DUSP2/IL1RN/ICAM1/SOWAHC/RELB/CEBPD/CXCL2/SERPINE1/BCL2A1/SOCS1/MT2A/GADD45B/SERPINB2/MAP3K8/PLAUR/JUNB/CDKN1A/UPP1/PTGS2/SERTAD1/BHLHE40/GCH1/PELI1/RHOB/MARCKSL1/IER2/MSR1/TNFAIP2/GBP7/CLEC4D/BIRC3/MYADM/NFKBIB/SOCS3/PFKFB3/RNF19B/GLIPR2/NFKB1/PIM1/IL10/ACOD1/VASP/HIF1A/LCN2/HSP90AA1/SLC39A4/HSPA1B/RIOK3/PPP1R15B/MAPRE1/SLC7A7/MRPL52/TES/PHOX2A/TLE3/CAV1/GTPBP4/EHD1/RALA
GO_MONONUCLEAR_CELL_MIGRATION	C5_GO	91	0.585559	2.36856	5.99875e-10	5.95226e-08	3074	tags=38%, list=14%, signal=33%	TNF/CCL3/CCL5/CXCL10/THBS1/CSF1/CCL4/IL6/CCL2/SERPINE1/S100A12/XCL1/TNFSF11/IL34/ANXA1/C5AR1/CCR1/FPR2/CCL3L3/C3AR1/CSF1R/CCL3L1/PDGFB/CCL22/CCL19/AKIRIN1/PLA2G7/SLIT2/LGALS3/CCL25/IL4/CCL18/RARRES2/CCL15/CXCL17
GSE19923_HEB_KO_VS_HEB_AND_E2A_KO_DP_THYMOCYTE_DN	C7_immunologic	197	0.469724	2.15476	6.06789e-10	6.00157e-08	4043	tags=32%, list=19%, signal=27%	TNF/IRF8/RRAD/CSF1/PHLDA1/CCL4/DUSP2/IER3/RELB/IL6/PDCD1/IL12RB1/ATF3/SLFN12L/EGR2/TRAF4/ZAP70/GADD45B/NFKBIA/ACTG2/SH2D2A/PIM3/SEMA7A/GATA3/ARID3B/GCH1/FOSL1/CCR1/PELI1/PRDM1/IER2/MAP2K3/NFKB2/ELL2/FURIN/NR4A1/IGF1/UBALD2/CMTM3/NFKB1/B3GNT2/NAB2/TNFSF8/ZFP36L1/CHMP4B/IL10/MAPK6/IL4/TYMP/SLC7A7/ZNF281/GABARAPL1/TES/TLE3/NSMF/USP38/BCL10/EIF1/EGR1/CCL1/ETF1/RYR2/ADRA1B/BTG1
SMIRNOV_RESPONSE_TO_IR_2HR_UP	C2_curated	51	0.68343	2.46979	6.26416e-10	6.1759e-08	2935	tags=51%, list=14%, signal=44%	CCL3/RRAD/TNFSF9/HCAR3/PMAIP1/IER3/CD83/SGK1/ATF3/IER5/CDKN1A/FOSL1/PLK2/RAB11FIP1/GADD45A/ID2/PTGER4/RNF19B/TIGAR/SOX9/PIM1/SLC30A1/CDC25A/ZBTB10/FAS/AEN
TSAI_RESPONSE_TO_IONIZING_RADIATION	C2_curated	150	0.509942	2.23679	7.35024e-10	7.2236e-08	2842	tags=31%, list=13%, signal=27%	CCL3/MSC/CXCL10/HBEGF/CCL4/CD83/IL2RB/MDFI/IRF4/PLAU/DLX2/SGK1/IFITM1/S100A8/NR4A3/COL6A1/NFKBIA/TNFAIP3/NFKBIE/JUNB/CDKN1A/DPYSL3/STAT1/CD79A/CCR1/ATP12A/NFKB2/AXL/BIRC3/CCL3L1/PTTG1/FGFR1/AHR/TRAF1/NFKB1/DDIT3/BTG2/TCF21/ENC1/LGALS3/CARTPT/PLK1/CCL18/TSC22D3/FAS/CDKN1C/ENO1
GO_ADAPTIVE_IMMUNE_RESPONSE	C5_GO	639	0.33798	1.74011	7.71068e-10	7.55377e-08	6848	tags=44%, list=32%, signal=31%	TNF/PRF1/CD7/SH2D1A/JCHAIN/IL1RL1/HLA-G/ICAM1/CD70/BCL3/CLCF1/GPR183/LAX1/IL23A/RELB/IRF4/IL6/PDCD1/IGKC/LTA/IL12RB1/CD28/ZC3H12A/TRAT1/CD3E/FOXJ1/XCL1/ZAP70/CD6/BCL6/HLX/TRBV28/DUSP10/TNFAIP3/HAVCR2/ANXA1/TBX21/LEF1/CD48/TNFRSF13C/RIPK2/GATA3/IGLV1-40/FCER1G/CD79A/SUSD4/IGHJ1/TRBJ2-6/SLAMF1/CD3D/PRDM1/ZNF683/NFKBID/SLC22A13/ICOSLG/CLEC4D/NFKB2/LILRB3/TRBC2/NLRP3/LILRA6/LILRA1/CD27/EBI3/CD1B/IRF1…
GNF2_HCK	C4_computational	91	0.583308	2.35945	8.28396e-10	8.0897e-08	5545	tags=60%, list=26%, signal=45%	TREM1/STX11/LILRA5/FCN1/S100A9/APOBEC3A/HCK/RGS2/CLEC7A/TYROBP/ITGAX/FGR/FCER1G/CYBB/C5AR1/FCGR2A/CCR1/FPR1/TNFAIP2/LILRB3/LILRA6/LILRA1/LST1/RHOG/COTL1/TNFRSF1B/NCF2/SH3BGRL3/ITGB2/MNDA/LY96/LILRB1/TLR2/CMTM6/CD93/TYMP/SLC7A7/MYO1F/NOD2/ZNF467/AIF1/LILRA2/SPI1/GMIP/CFP/CDA/UBE2D1/SDCBP/MS4A6A/STXBP2/CD1D/GABARAP/S100A4/ARRB2/TMEM127
GSE6269_FLU_VS_STAPH_AUREUS_INF_PBMC_DN	C7_immunologic	159	0.489313	2.17739	8.45449e-10	8.23019e-08	3779	tags=38%, list=17%, signal=31%	ADM/IL1RN/GAS7/SLC15A3/ICAM1/RAB20/SERPINA1/IL1RAP/S100A10/LILRA5/CREB5/FCN1/S100A9/PLP2/MIR22HG/NINJ1/S100A8/TIMP1/CLEC7A/PLAUR/CDKN1A/CDKN2D/PPIF/FXYD6/IFI30/FPR1/DYSF/NEU1/GNA15/CDC42EP3/CEBPB/FSCN1/SOCS3/FCGR1A/RNF19B/NFIL3/FHL3/VIM/ZYX/MICAL2/LGALS3/SLC22A4/ELF4/CD63/TLR2/CKAP4/HIF1A/RIOK3/GAPDH/RNASE2/CD93/DHCR7/TKT/LYZ/MXD1/NOD2/TLE3/SPI1/EIF1/EGR1
RODRIGUES_THYROID_CARCINOMA_ANAPLASTIC_DN	C2_curated	508	-0.372589	-1.83584	9.00022e-10	8.73389e-08	4633	tags=36%, list=21%, signal=29%	SNRPN/NLK/PSD4/RALGAPA2/BBS1/RNPC3/MAML3/SRRD/SLC25A23/PINK1/KLF9/MZF1/PDSS2/ABHD14A/C11orf71/CYB5R1/SMAD4/SLC39A14/FKBP7/RIMKLB/DEPTOR/CRYL1/WFS1/PLA2G12A/ST3GAL1/CERK/NSD1/LONP2/LRIG3/ZBTB37/C12orf49/FMNL3/FOS/ARID1B/BANK1/ECM2/MSRB2/TEX2/PKNOX1/N4BP2L2/TMEM50B/DCAF17/MAGI2/ARHGAP5/ZFAND4/GABPB2/SYNPO2/CPNE3/COL14A1/ALDH3A2/KBTBD7/HDAC11/PTPRG/ST8SIA4/PPP3CB/SHANK2/DCAF8/MEF2C/IQCK/MSI2/BRWD1/P…
GSE360_CTRL_VS_T_GONDII_DC_DN	C7_immunologic	192	0.466498	2.12374	9.17497e-10	8.86726e-08	1915	tags=28%, list=9%, signal=25%	CP/DUSP5/MYRF/STAR/TRIB1/TUBB2A/STX11/CD83/RELB/CEBPD/IGKC/CCR7/DUSP4/XCL1/NTRK1/NR4A3/GADD45B/SLC24A5/NFKBIA/TNFAIP3/AFF2/RCVRN/SEMA7A/PITPNM1/ALAS2/GAL/GBP1/SAT1/OLIG2/ZFR2/PPP1R16B/CXCL9/BASP1/TNFAIP2/ACTC1/NFKB2/IFIT3/SOCS3/IFI6/PTGER4/SYN1/MYH6/PTPRT/TRAF1/TAP1/KRTAP26-1/KIF25-AS1/HMGCS2/IL15RA/NRP2/HEXIM1/NFKB1/RGS1
MIR5582_3P	C3_motif	655	-0.35023	-1.75984	9.19512e-10	8.86726e-08	4884	tags=34%, list=22%, signal=27%	KIAA1143/DPY19L1/TRIM59/ZBTB33/ANAPC1/TRIM5/PNISR/ELK4/ZNF618/TRUB1/PHC3/FAM120A/DACH1/NSL1/AVL9/ARFGEF1/RBM47/C3orf70/TJP2/DTWD2/ABCD4/NLK/FNDC3A/LUC7L3/ZBTB41/RAB27B/KLF9/ZNF148/BRWD3/COLCA1/RNF217/ZFX/PHIP/IKZF2/ZZZ3/SPICE1/PIN4/MRE11/LCORL/TRPM7/FSD1L/CRMP1/SCAMP1/MEX3B/NRXN1/TAOK3/ADAMTS19/ADGRL1/TFCP2/PPP4R3B/CCDC84/MYEF2/ATXN3/KALRN/SEL1L/CNTLN/ZNF680/ZFAND4/CPEB1/PTAR1/LRP6/RPS6KA6/SERINC…
GSE29618_MONOCYTE_VS_MDC_DAY7_FLU_VACCINE_UP	C7_immunologic	198	0.463233	2.12428	9.2966e-10	8.93719e-08	2210	tags=25%, list=10%, signal=22%	PTX3/CXCL8/CXCL1/HCAR3/G0S2/ICAM1/TREM1/FBN2/IER3/SERPINA1/LILRA5/FCN1/S100A9/CXCL2/S100A12/NINJ1/S100A8/APOBEC3A/CLEC7A/NFKBIA/CYP1B1/UPP1/PLIN2/CRISPLD2/KLF2/SAT1/CYBB/C5AR1/FCGR2A/PELI1/CD68/FXYD6/HMOX1/FCAR/DYSF/C3AR1/CDC42EP3/ELL2/CEBPB/TNFRSF1B/NCF2/SIPA1L1/BTG2/PLA2G7/ITGAM/ENC1/LGALS3/ZFP36L1/HLA-B
BROWN_MYELOID_CELL_DEVELOPMENT_UP	C2_curated	162	0.499894	2.22183	9.4641e-10	9.05562e-08	2705	tags=34%, list=12%, signal=30%	TNF/GSTM1/IL1RN/IL4I1/SLC15A3/CEBPD/SLFN12L/BCL2A1/FHAD1/HCK/HLX/TYROBP/PLAUR/MCEMP1/JUNB/UPP1/ITGAX/FGR/EDIL3/SAT1/CYBB/FCGR2A/CCR1/CD68/FPR1/FPR2/CD33/NQO1/TRPM2/CSTA/IQGAP1/DGAT2/MPEG1/SPACA7/ID2/PLK3/FCGR1A/CLDN1/GLIPR2/ITGB2/TP53INP1/SLC31A2/ACKR1/LILRB4/S100A11/ZYX/ITGAM/EDAR/SGMS2/OPRPN/TLR2/C3/CNN2/LCN2/PZP
MORF_NPM1	C4_computational	157	0.495025	2.19836	9.47848e-10	9.05562e-08	9195	tags=81%, list=42%, signal=47%	UBC/CLIC1/SLC25A6/CFL1/ACTB/COX6A1/EIF4G2/HSP90AA1/ACTG1/RHOA/ENO1/PFN1/PSMB1/YBX1/UBB/SNRPB/GNAS/UQCRFS1/RPS16/COX4I1/YWHAQ/RPS2/RPS17/FAU/SRP14/MAZ/RPLP2/HDGF/STRAP/TUBB/RPL28/TUBA1B/PTMA/RPS27A/RPL23A/RPL29/RPLP1/RPL6/SLC25A3/PGK1/RPL19/RPL14/HMGN2/HSP90AB1/PHB2/RPS5/ANP32B/SNRPE/RPL4/RPL27/RPS8/DDX49/RPS7/SUMO3/ACP1/USP22/CCT7/SUMO2/JTB/XRCC6/RPL8/EEF2/RPS19/RPL13A/MRPL23/PARK7/SRSF2/EEF1A1/A…
PID_IL12_2PATHWAY	C2_curated	62	0.644402	2.43439	1.03584e-09	9.86577e-08	2757	tags=42%, list=13%, signal=37%	CCL3/CCL4/IL2RA/RELB/IL2RB/IL12RB1/GADD45G/CD3E/SOCS1/IL2RG/GADD45B/HLX/TBX21/LCK/STAT1/RIPK2/CD3D/MAP2K3/NFKB2/IL18RAP/NFKB1/GZMB/IL12RB2/CD8A/IL4/HLA-A
MORF_NME2	C4_computational	151	0.509537	2.23031	1.10922e-09	1.05322e-07	9195	tags=83%, list=42%, signal=48%	MYLPF/EEF1A2/UBC/CLIC1/SLC25A6/CALR/CFL1/ACTB/COX6A1/MIF/EIF4G2/NME1/ALDOA/HSP90AA1/ACTG1/ENO1/COX8A/PFN1/PSMB1/LYPLA2/UBB/SNRPB/GNAS/RPS16/COX4I1/FAU/SRP14/RPLP2/HDGF/TUBA1B/ARF5/RPS27A/OTUB1/PSMD8/COX5B/NDUFA2/CYC1/RPL23A/TBCB/RPL6/PSMC1/MYL6/PGK1/RPL19/HMGN2/HSP90AB1/SAP18/RPS5/C9orf16/PUF60/SNRPE/RPL36AL/URM1/RPL27/RPS8/RALY/RPS7/SUMO3/CCT7/SUMO2/JTB/NDUFA1/RPL8/EEF2/SSNA1/RPS19/RPL13A/MRPL23…
MORF_RAN	C4_computational	254	0.433225	2.04561	1.12354e-09	1.06353e-07	9855	tags=76%, list=45%, signal=42%	TUBB2A/MYLPF/COX5A/TPI1/PPP1CA/COX6A1/MIF/EIF4G2/SLC25A5/PGAM1/C1QBP/NME1/HSP90AA1/ACTG1/COX8A/PSMD7/EBP/PSMB2/PSMB1/EIF3C/EEF1E1/YBX1/PSMA2/TUFM/SEC61B/UBB/SNRPB/GNAS/UQCRFS1/COX4I1/YWHAQ/FAU/SRP14/PSMB3/RPLP2/HDGF/HDAC1/NDUFS5/PCNA/SNRPD2/TUBA1B/RPS27A/PSMD8/CSNK2B/SUMO1/COX5B/LYPLA1/NDUFA2/SET/HNRNPAB/GPI/CYC1/RPL23A/COPE/PSMB6/RPL6/EIF4H/PPM1G/PSMC1/PRMT1/TMED2/ELOC/KHDRBS1/SLC25A3/PGK1/RPL14…
IL15_UP.V1_UP	C6_oncogenic	179	0.478386	2.16567	1.15199e-09	1.08713e-07	2468	tags=31%, list=11%, signal=27%	TNFRSF4/LIF/CCL4/DUSP2/TNFRSF9/TNFRSF12A/SPP1/TRIB1/ETV4/DLX2/HS3ST1/PDE4A/DUSP4/EGR2/CD69/SOCS1/GADD45B/TNFSF11/ZBTB32/TMEM158/JUNB/PSG4/FUT5/SPRY2/KCNJ2/FOSL1/EGR3/SLAMF1/RHOB/PAK6/RAB11FIP1/NOX4/PTH1R/IRS1/SLC7A5/LSP1/DHRS3/CCNE1/HRH3/RGCC/PRM1/PIM2/SHROOM2/AHR/NEUROD4/FLT3LG/IL18RAP/LILRB4/MED26/PIM1/MAFF/CDC25A/OSM/IL10/SH2D4A
MIR6873_3P	C3_motif	372	-0.403733	-1.9382	1.17562e-09	1.1039e-07	3781	tags=33%, list=17%, signal=28%	MAPK14/EYA3/METTL8/DISC1/HDAC8/CNIH3/PCSK4/PSD3/SYNPO2/TRPC5OS/SPOP/TBL1X/ZNF701/RIN2/KCNS1/ZNF761/UNC13A/SLAIN1/C22orf46/KCNK6/MSI2/PURA/TMEM245/REP15/DTNA/TVP23C/DPF3/ELAVL4/ZNF514/GK5/NRN1/SYNJ2BP/DPYD/PDK3/SIGLEC15/CACNG8/CTTNBP2NL/PROM1/ZBTB40/PLGLB1/TMEM135/ZNF90/ZNF544/ZNF772/ZNF778/PITPNM3/SH3PXD2A/ZDHHC21/VAT1L/NPAT/ZSCAN22/LTN1/RTN4RL1/ZNF117/ZNF730/ZNF813/ZNF302/ZNF816/KRIT1/RNF185/CAD…
ZHOU_INFLAMMATORY_RESPONSE_FIMA_DN	C2_curated	265	-0.447265	-2.04966	1.17691e-09	1.1039e-07	4029	tags=44%, list=19%, signal=36%	FAM78A/PAGR1/NDRG2/WIPF1/ENHO/FANCE/DOK3/ARHGEF3/NCKIPSD/ZBTB14/ANKRD39/BRAT1/ZBED5/NRXN3/ELAVL3/MCTP2/WDR91/CACNB2/XPC/NHSL1/ST3GAL3/AFF3/ECM2/MBP/AQP11/ABHD10/RPE/PSTPIP1/DGKZ/LRMP/NIF3L1/TTC30B/GPAM/CHD9/RIN2/TLR1/DPF3/BOLA1/PCDHGC5/FGF7/FGD3/SHPK/VIPAS39/DTWD1/TTC23L/ACTL6B/ZNF853/C2orf74/DGCR2/BICD1/MBLAC2/ZNF366/TRIM32/LDLRAP1/LRRC1/MLYCD/TIMM21/FASTKD1/CPS1/SLC25A30/FAM217B/HEATR3/SLF2/SLC…
TARTE_PLASMA_CELL_VS_PLASMABLAST_DN	C2_curated	294	0.411192	1.9685	1.18241e-09	1.1057e-07	5905	tags=36%, list=27%, signal=27%	LGALS1/KYNU/CD70/ITGB7/BCL3/IL2RB/S100A10/SGK1/LDLR/HPGD/PDLIM1/CDKN1A/CLEC2B/PPIF/IFI30/CORO1A/RNASE6/DHCR24/SLC7A5/LSP1/ACOT7/KPNA2/IQGAP1/CCNE1/PCLAF/IGF1/CLIC1/PLK4/PSMC3IP/NFIL3/SNRPC/BOP1/NEK2/LILRB4/ORC1/MTHFD2/UBE2S/HSPE1/GZMB/TUBA4A/TMSB10/TYMS/MAPK6/NME1/IDH2/FABP5/PSMA1/FAS/YWHAH/CD52/EBP/PSMB2/TXN/CYTIP/HMGB2/DTYMK/YBX1/TKT/DBI/KIF11/PSMA2/PPP4C/UCHL3/FOXM1/GGH/TAX1BP3/RRM2/AHCY/FLNA/…
WIERENGA_STAT5A_TARGETS_GROUP2	C2_curated	53	0.670673	2.46418	1.21713e-09	1.13473e-07	1985	tags=49%, list=9%, signal=45%	CCL3/CXCL8/CCL5/CXCL10/SPP1/PLEKHH3/CD83/PLAU/CCL2/CCR7/GADD45B/COL6A1/CSF2/KLF2/GPR65/PRDM8/BHLHE40/ABCA1/KLF6/CD1B/TRAF1/NFIL3/CCL22/RGS1/STAP1/BTG2
GSE16450_CTRL_VS_IFNA_12H_STIM_IMMATURE_NEURON_CELL_LINE_UP	C7_immunologic	188	-0.481375	-2.13783	1.23889e-09	1.15154e-07	5545	tags=46%, list=26%, signal=35%	KLF12/BLM/GPD1L/MLXIP/ADGRA3/PPP1R10/LRBA/NF1/PDIA5/THOC1/OSBPL1A/UTRN/TASP1/TNRC6A/TANC2/FUT8/PEX7/MSTO1/VWA8/EXOSC2/RALGAPA2/PCNT/PBX3/DLG1/SCFD2/PDSS2/LPP/SMIM8/BIVM/VPS13B/PRPF38B/MDN1/DHX33/FCHSD2/CTPS2/RASGRF2/HERC2/ITFG2/SLC39A11/ZNF839/FBXO4/STAU2/KDM4A/PRKCQ/TRERF1/LINC00667/CLASP2/PRKAG2/VPS13D/SLC35B4/NDC1/BBS9/POLR3B/USP51/DPYD/PLD6/FOCAD/EHBP1/ZBTB40/TMEM135/MBTPS2/IVD/TANGO6/THADA/P…
KRAS.600.LUNG.BREAST_UP.V1_UP	C6_oncogenic	272	0.424618	2.01995	1.262e-09	1.16949e-07	3000	tags=30%, list=14%, signal=26%	RPS4Y1/CXCL8/CXCL1/STX1A/CXCL3/INHBA/LIF/HBEGF/HIC1/HAS2/G0S2/ADGRA2/IL1RL1/RETN/MMP9/ETV4/IL23A/SAMD14/CXCL2/WNT1/KCNH2/NTRK1/PLAUR/TNFAIP3/S100A5/TMEM158/SH2D2A/PTGS2/FUT5/DNAH9/CSF2/SPRY2/RELN/PRDM1/NPHS1/LDB3/FRMD1/NGF/BIRC3/LILRA6/MYOC/CD1B/PRG3/CD160/ATP4A/ID2/PIWIL1/CHST2/SPIB/TRAF1/MB/KCNK15/PLVAP/CD1A/TAGLN3/HSD17B2/LHB/CCL22/GYPC/DDIT3/SLIT2/HSD3B2/CTNNA2/ADAM8/TFDP3/GFAP/GULP1/USH2A/AT…
GSE34205_HEALTHY_VS_FLU_INF_INFANT_PBMC_DN	C7_immunologic	186	0.471676	2.14775	1.27004e-09	1.17341e-07	6059	tags=49%, list=28%, signal=36%	ADM/STX1A/OASL/RELB/FCN1/S100A9/LDLR/MPO/KLHDC7B/IFITM1/MT2A/S100A8/LGALS3BP/ISG15/ODF3B/SAT1/FXYD6/DYSF/LY6E/MTFR2/OTOF/UBC/NECTIN2/RHOG/IFI6/IFITM2/LINC00487/MAP1LC3B/EPSTI1/MTHFD2/S100A11/CENPN/MT1E/NXT1/CENPU/IRF7/GNG5/NEXN/IL10/PGAM1/ALAS1/ZBP1/CMPK2/MASTL/LSM1/TLR2/USP18/FAS/RNASE2/TAF9/COX8A/SIRPB1/HMGB2/HELZ2/CDCA4/MX1/ARL8A/EXOSC9/UQCRFS1/NUDT15/PATL1/SRP14/SPHK1/TFRC/B2M/PLIN3/IFI35/KCT…
HELLER_SILENCED_BY_METHYLATION_UP	C2_curated	273	0.420173	1.99873	1.28686e-09	1.18541e-07	3295	tags=35%, list=15%, signal=30%	TNFRSF4/PRF1/CXCL10/PHLDA2/TNFRSF9/KYNU/ICAM1/PMAIP1/UPB1/IER3/MMP9/TUBB2A/GPR183/SSTR2/LDLR/ARL4C/CCR7/IFITM1/SOCS1/MIR22HG/NR4A3/HCK/ISG15/BCL6/CLEC7A/MAP3K8/CYP1B1/APOE/CDKN1A/S100P/PRAME/STAT1/MAFB/GATA3/GBP1/SAT1/KCNN2/SERPINF1/C5AR1/APOC1/CHI3L1/CRYBB1/MCAM/OCA2/RELN/PPP1R16B/MSR1/TNFAIP2/NQO1/BIRC3/IZUMO4/LSP1/CSTA/EBI3/SMARCA1/CST7/COL9A2/IFIT3/FSCN1/SOCS3/TNFRSF1B/CDH11/NCAN/NCF2/PTGER4/…
AIZARANI_LIVER_C39_EPCAM_POS_BILE_DUCT_CELLS_4	C8_cellSignature	181	0.48431	2.2014	1.32324e-09	1.21529e-07	2772	tags=35%, list=13%, signal=31%	CXCL8/CXCL1/CXCL3/INHBA/LIF/THBS1/HBEGF/CSF1/PHLDA2/TNFRSF12A/CITED4/CREB5/SDC4/CCL2/ATF3/PDLIM1/NEDD9/NFKBIA/TUBB6/CRYAB/PIM3/TRNP1/SAT1/VEGFA/MCAM/RAB11FIP1/KLF6/CDC42EP1/TNFAIP2/EZR/NFKB2/BIRC3/DSP/MYADM/GADD45A/EDN1/SOX4/ANXA2/AHNAK/CLDN1/VMP1/SLC3A2/EGFR/MET/NFKB1/SOX9/RTN4/S100A11/ZYX/MAFF/TPM4/ANKRD1/TRPV6/HMGCS1/DCDC2/CD63/SGMS2/ATF4/CPM/CFTR/HSP90AA1/HSPA1B/ACTG1
GO_SIGNAL_TRANSDUCTION_BY_PROTEIN_PHOSPHORYLATION	C5_GO	902	0.310539	1.64212	1.3817e-09	1.26521e-07	2437	tags=19%, list=11%, signal=18%	ROR2/TNF/CCL3/DUSP8/LIF/CCL5/DUSP5/THBS1/HBEGF/SPRY4/CCL4/PDGFA/IL11/DUSP2/IL2RA/ROR1/ICAM1/TRIB1/GPR183/LAX1/IL2RB/IL6/LILRA5/FZD8/PROK2/CCL2/ATF3/GPBAR1/GADD45G/ZC3H12A/CCR7/SEMA6A/DUSP4/S100A12/ADRA2B/IL5RA/TRAF4/XCL1/NTRK1/IL2RG/GADD45B/GPER1/TENM1/RGS2/TNFSF11/EPHA4/DUSP10/MAP3K8/ERBB3/IL34/HAVCR2/APOE/SH3RF3/IRAK2/CRYAB/FGF21/CSF2/SPTBN2/SEMA7A/RIPK2/SPRY2/GBP1/FAM83D/PRKCA/EDN3/VEGFA/TRIB2…
TAKEDA_TARGETS_OF_NUP98_HOXA9_FUSION_16D_UP	C2_curated	171	0.481993	2.15209	1.40375e-09	1.2816e-07	2732	tags=36%, list=13%, signal=32%	HBG1/WT1/LIF/CLECL1/THBS1/ASB2/CCNA1/TPSAB1/ADGRA2/ITGB7/OASL/IRF4/DUSP4/HPGD/PDLIM1/S1PR3/IFITM1/ISG15/ASPHD2/C12orf75/ADRB1/PTGS2/STAT1/AP1S3/FCAR/PPP1R16B/LY6E/HBA1/LTBP1/TGM5/NCALD/CLEC4D/LSP1/CDC42EP3/LILRA1/SOX4/SLC12A8/IFIT3/TRDC/IFI6/CFD/DCST1-AS1/FCER2/AHR/CHST2/C15orf48/GEM/CD1A/IFIT2/EPSTI1/CD1E/SAMHD1/TOX/GNAI1/BCL2L11/CD1C/CMPK2/SLITRK4/TMEM200A/IRX3/SIGLEC6/USP18
MIR8068	C3_motif	387	-0.395507	-1.91054	1.42815e-09	1.30003e-07	3700	tags=29%, list=17%, signal=25%	TMEM131/FOSB/PKD2/FAM104B/RASA4/FGGY/CASD1/BCKDHB/POU2F1/ATP2B4/MECP2/KIF26B/SPOP/TMEM86A/SCAI/FAM181B/ZNF507/MAP3K13/VNN1/NAGK/ZNF782/CCSER2/PDP2/MAP3K15/ANGEL2/RAB3GAP2/VPS13A/TNRC6B/MCC/ABCD2/SLC46A3/PTGS1/ATP6V0A2/FBN1/ZFHX3/TTC23L/KLLN/MINDY2/MTG2/MBLAC2/CSAD/SMAD9/CNTN1/NIPAL2/ERC2/IKZF3/ZNF280D/HLTF/ETFBKMT/IL15/TMEM168/BCL11A/TCAIM/FOXI1/NCAM2/EXTL2/FGF13/APOLD1/ACSM3/RTKN2/WBP1L/EYS/YPEL…
GO_T_CELL_DIFFERENTIATION	C5_GO	250	0.432066	2.03874	1.46567e-09	1.33027e-07	2618	tags=27%, list=12%, signal=24%	TNFRSF18/TNFSF9/IL2RA/TCF7/HLA-G/BCL3/CD83/GPR183/IL23A/RELB/IRF4/IL6/IL12RB1/FZD8/WNT1/LFNG/CD28/ZC3H12A/CCR7/CD3E/FOXJ1/SOCS1/ZAP70/BCL6/HLX/DUSP10/ANXA1/TBX21/CRTAM/LEF1/LCK/SHH/RIPK2/MAFB/GATA3/FCER1G/EGR3/CD3D/PRDM1/ZNF683/RARA/NFKBID/CLEC4D/NRARP/NLRP3/CD27/RUNX3/IRF1/CCR9/SOX4/PTGER4/SPINK5/LILRB4/CCL19/TNFSF8/WNT4/ADAM8/SMAD7/ZFP36L1/FOXN1/TOX/PRR7/GLI2/CD8A/SLC46A2/JMJD6/IL4/ITK
GSE2706_R848_VS_R848_AND_LPS_2H_STIM_DC_DN	C7_immunologic	179	0.475867	2.15427	1.61609e-09	1.46249e-07	2666	tags=34%, list=12%, signal=30%	TNF/PTX3/CXCL8/CXCL3/INHBA/CCL5/HCAR3/TTLL10/PMAIP1/OASL/CXCL2/BCL2A1/CD69/IFITM1/OSR2/NR4A3/ISG15/ESRP1/TNFAIP3/PTGS2/HES4/CXCL11/GBP5/IRAK2/PSG4/GBP1/GBP2/GCH1/RHOV/EGR3/PELI1/FXYD6/PRDM1/CXCL9/KLF6/CDKN2B/CSRNP1/IFIT3/LMOD3/SOCS3/HAPLN3/SHROOM2/TNFAIP6/ARRDC3/TAP1/AKR1B10/FLT3LG/IFIT2/IL15RA/ZNF80/TLX3/DOK6/CCK/DNAJB4/ISG20/IL10/IL12RB2/ACOD1/IQCD/MASTL/GTF2B
GSE32986_CURDLAN_LOWDOSE_VS_CURDLAN_HIGHDOSE_STIM_DC_DN	C7_immunologic	195	0.468317	2.14487	1.65693e-09	1.49506e-07	2988	tags=27%, list=14%, signal=24%	PTX3/TNFSF9/PHLDA1/CCL4/PDGFA/IL1RN/GAS7/F3/RAB20/SOWAHC/LTB/SDC4/CCL2/BCL2A1/NINJ1/HCK/GADD45B/SERPINB2/PLAUR/ADAP1/IRAK2/CSF2/FGR/PELI1/PRDM1/FPR2/TNFAIP2/EBI3/SLC2A6/IRF1/NECTIN2/IFIT3/TNFRSF1B/ID2/PLK3/TRAF1/IFIT2/MET/HIVEP1/SLC31A2/GRHL1/HERPUD1/SDE2/ISG20/ALAS1/RHOF/RBPMS2/C3/SERTAD2/FLRT3/FAS/LYNX1/PTPRE
PID_NFAT_TFPATHWAY	C2_curated	45	0.707912	2.51134	1.6654e-09	1.49832e-07	1655	tags=36%, list=8%, signal=33%	TNF/CXCL8/EGR4/IL2RA/IRF4/EGR2/TBX21/JUNB/PTGS2/CSF2/GATA3/FOSL1/EGR3/E2F1/IL3/SLC3A2
AMIT_EGF_RESPONSE_40_HELA	C2_curated	42	0.72858	2.55255	1.7604e-09	1.57919e-07	1491	tags=52%, list=7%, signal=49%	DUSP5/DUSP2/CCNA1/IER3/BCL3/IL6/SGK1/ATF3/LDLR/SLC2A3/JUNB/PTGS2/KLF2/EGR3/CBX4/KLF6/IER2/KCNJ12/ZFP36/CEBPB/HES1/NR4A1
MODULE_114	C4_computational	322	0.394463	1.90843	1.82539e-09	1.63275e-07	9468	tags=68%, list=44%, signal=39%	RPS4Y1/DDX3Y/GADD45G/PLP2/IL2RG/CLEC2B/KRT24/MRPS24/CST7/RHOG/MB/CLIC1/TMSB4X/TPI1/SNRPC/MNDA/LGALS3/ZFP36L1/CYBA/CD63/SLC25A5/FABP5/ALDOA/HLA-A/TIPIN/PFN1/PSMB1/SCAND1/P4HB/HSBP1/LYZ/PSMA2/PRELID1/SEC61B/SNRPB/AIF1/UQCRFS1/ARHGDIA/EIF1/RPS16/SF3B5/UCP2/FKBP2/YWHAG/GPX4/HIGD2A/RPS2/VDAC1/FAU/PPIB/PKM/C19orf53/GPX1/CAPNS1/B2M/RPLP2/STRAP/RPL28/NDUFS5/PCNA/SNRPD2/PTMA/ARPC2/RPS27A/PRDX4/ETFB/PSMD8/…
GSE18791_UNSTIM_VS_NEWCATSLE_VIRUS_DC_10H_DN	C7_immunologic	188	0.465522	2.12212	1.88846e-09	1.68428e-07	2791	tags=28%, list=13%, signal=24%	TNF/CXCL1/CXCL10/IL10RA/PMAIP1/CYP1A1/OASL/STX11/IL6/NEDD9/OSR2/LGALS3BP/GADD45B/ISG15/MAP3K8/PTGS2/CXCL11/RGL1/GBP5/STAT1/KCNJ2/GCH1/ETV7/CXCL9/BCL2L14/IER2/CASP5/NECTIN2/IFIT3/IFI6/IFNA7/ABTB2/TAP1/ARL5B/IFIT2/IL15RA/EPSTI1/DOK7/SLC31A2/IRF7/IFNA10/PDE4B/NEXN/ISG20/ZBP1/CSRP2/CMPK2/MASTL/GTF2B/USP18/FGFBP3/FAS
GSE42021_TREG_PLN_VS_CD24HI_TREG_THYMUS_UP	C7_immunologic	198	0.458555	2.10282	1.93583e-09	1.72155e-07	1491	tags=20%, list=7%, signal=19%	TNF/TNFSF9/CXCL3/PHLDA1/PDGFA/DDX3Y/DUSP2/IL1RN/ICAM1/IER3/CD83/RELB/FBLN2/SGK1/CXCL2/SERPINE1/EGR2/GADD45B/MYL4/NFKBIA/PLAUR/JUNB/CDKN1A/UPP1/PTGS2/BHLHE40/F2RL3/PELI1/RHOB/MARCKSL1/IER2/TNFAIP2/CLEC4D/BIRC3/ETS2/IRF1/CEBPB/SOCS3/NR4A1
GO_EXTERNAL_SIDE_OF_PLASMA_MEMBRANE	C5_GO	392	0.37404	1.84748	2.01281e-09	1.78486e-07	3384	tags=28%, list=16%, signal=24%	TNF/CD276/TNFRSF4/TNFRSF18/CXCL10/THBS1/IL2RA/TNFRSF9/CXCR3/IL1RL1/HLA-G/ICAM1/F3/CD83/ECE1/IL2RB/PDCD1/IGKC/FCN1/IL12RB1/CD248/LDLR/CD28/CCR7/CD3E/IL5RA/CD69/CD6/IL2RG/EFNA5/ANXA1/RTN4RL2/CCR4/CD5/CLEC2B/TNFRSF13C/ULBP2/SEMA7A/FCER1G/CD79A/SCUBE1/CCR1/MCAM/CD3D/S1PR1/ABCA1/CXCL9/CD33/MSR1/ICOSLG/ULBP1/TRBC2/SLC7A5/CHRNB2/THBD/CD27/EBI3/CD1B/CTSV/FCGR3A/CCR9/TRDC/SCNN1G/ICOS/FCER2/ITGB2/ENOX1/FLT…
ACTAYRNNNCCCR_UNKNOWN	C3_motif	450	-0.376533	-1.83197	2.05892e-09	1.82053e-07	5035	tags=33%, list=23%, signal=26%	FNTB/U2AF1L4/TOGARAM1/SWT1/SNX1/PDIA5/CIAO1/MSL3/FAM78A/CALCOCO1/ZNF274/VPS45/HMBOX1/SMIM11A/CMAS/DTX2/TRUB1/TTBK2/ZFYVE19/INVS/NPRL2/MZF1/NUMA1/HACE1/ZNF569/CPEB3/SERPINI1/WRN/BIVM/MVB12A/HEXIM2/ZNF419/ZFP28/CA11/TXLNG/ALKBH8/PPP4R3B/NKIRAS1/VPS41/BET1/BOD1/HIKESHI/SKP2/ZC4H2/POLK/HDAC8/PLEKHB1/POLR1B/SMARCAL1/SGSM3/SLC35B4/NAPB/TFAP4/MON1A/NDC1/TMEM102/SDCCAG8/RBL2/COA3/BRCA1/TMEM245/OPHN1/ZDHH…
MORF_AP2M1	C4_computational	211	0.445898	2.0676	2.08652e-09	1.83965e-07	9198	tags=67%, list=42%, signal=39%	TUBB2A/MYLPF/UBC/CLIC1/TPI1/CALR/CFL1/PPP1CA/COX6A1/EIF4G2/PGAM1/HSP90AA1/COX8A/PSMD7/SEPHS2/PSMB1/EIF3C/LYPLA2/POLR2L/P4HB/HSBP1/SEC61B/SNRPB/GNAI2/GNAS/CALM1/UQCRFS1/ARHGDIA/DDOST/COX4I1/YWHAQ/GPX4/FAU/PKM/SRP14/HDGF/C1D/TUBA1B/ARPC2/ARF5/OTUB1/PSMD8/CSNK2B/SUMO1/COX5B/NDUFA2/HNRNPAB/GPI/CYC1/COPE/TBCB/PSMB6/RPL6/PGD/PSMC1/PRMT1/TMED2/SLC25A3/MAP2K2/PGK1/GABARAP/HSP90AB1/SAP18/ANP32B/C9orf16/PU…
GO_POSITIVE_REGULATION_OF_CYTOKINE_PRODUCTION	C5_GO	442	0.366783	1.83252	2.09623e-09	1.84295e-07	3150	tags=27%, list=14%, signal=24%	TNF/CCL3/CD276/IRF8/THBS1/NFATC4/IL1RL1/HLA-G/F3/BCL3/CD83/IL23A/IL1RAP/IRF4/IL6/LILRA5/FCN1/LTA/IL12RB1/PYHIN1/LTB/SERPINE1/CD28/CCR7/CD3E/EPX/XCL1/CD6/NR4A3/TWIST1/CLEC7A/TYROBP/CYP1B1/HAVCR2/ANXA1/CRTAM/PTGS2/GBP5/CSF2/STAT1/SEMA7A/RIPK2/FGR/WNT11/GATA3/FCER1G/CYBB/C5AR1/PELI1/AZU1/HMOX1/RARA/C3AR1/CSF1R/NFKB2/SLC7A5/BIRC3/NLRP3/EBI3/IRF1/PRG3/CD160/CEBPB/TIGIT/RGCC/FURIN/TLR7/ADCYAP1/PTGER4/T…
GO_LEUKOCYTE_PROLIFERATION	C5_GO	305	0.412003	1.97926	2.15715e-09	1.89112e-07	2573	tags=25%, list=12%, signal=22%	CD276/TNFRSF4/TNFSF9/CLECL1/CCL5/CSF1/IL2RA/HLA-G/CD70/CLCF1/GPR183/IL23A/IL6/IL12RB1/SDC4/CD28/CD3E/IL5RA/FOXJ1/XCL1/ZAP70/LRRC32/CD6/TNFSF11/BCL6/TYROBP/TNFAIP3/IL34/HAVCR2/ANXA1/CRTAM/LEF1/CDKN1A/SHH/TNFRSF13C/RIPK2/GAL/CD79A/PELI1/CORO1A/CSF1R/ICOSLG/CHRNB2/PLA2G2F/EBI3/IRF1/CEBPB/LST1/TNFRSF1B/HES1/IGF1/IFNA7/TLR9/AHR/FCRL3/FLT3LG/CLC/VTCN1/CCL19/TNFSF8/WNT4/MNDA/CD320/LGALS3/PRKCD/TMIGD2/IF…
DORN_ADENOVIRUS_INFECTION_24HR_DN	C2_curated	39	0.730978	2.5227	2.18918e-09	1.91377e-07	1729	tags=46%, list=8%, signal=43%	TNFRSF12A/IER3/CD83/IL6/SH3BP5/SGK1/TRAF4/CCND1/NFKBIA/JUNB/EGR3/PLK2/MAP2K3/COL7A1/NFKB2/ELL2/NR4A1/IFIT2
GROSS_HYPOXIA_VIA_ELK3_DN	C2_curated	149	0.494309	2.1674	2.23006e-09	1.94399e-07	3007	tags=34%, list=14%, signal=29%	ADM/CXCL3/CXCL10/HBEGF/DUSP2/IL6/CXCL2/CCL2/ATF3/DMP1/DUSP4/NEDD9/S100A8/RND1/LHX9/NFKBIA/UPP1/PTGS2/PIM3/SPRY2/SAT1/VEGFA/BHLHE40/HOXB9/PLK2/KLF6/PDLIM4/CSRNP1/ZFP36/CDC42EP3/THBD/GADD45A/EDN1/CEBPB/PTGER4/PFKFB3/IRGM/NFIL3/LILRB4/MTHFD2/ANKRD1/CSF3/ATF4/TNC/HSPA5/C3/NOCT/ENO1/CD93/TSTA3
ZNF274_TARGET_GENES	C3_motif	834	-0.323935	-1.66383	2.27684e-09	1.97918e-07	3806	tags=24%, list=18%, signal=21%	PIGB/VPS41/TESMIN/ARHGAP5/BTAF1/LSM11/FAM214A/CRYZ/ZNF490/RHOT1/TRAPPC12/RALGAPA1/ZFAND4/SERGEF/HTATIP2/STK3/ADAM28/CNIH3/IMMP2L/HACD2/POLR1B/ARMC2/ATF7IP/ZNF621/ANKRD13D/DCP2/HDAC11/ZFP69/ERMAP/ZNF701/CCDC77/CLRN1-AS1/BBS9/IQCG/TTLL3/CENPQ/FAHD1/RALGAPB/ZNF525/HCG14/ADAMTS13/LZTR1/RSPH3/ERCC4/CYP4A22-AS1/NT5DC3/FAM220A/TTC9C/PCED1B/AHRR/SUMF1/DTNA/CABLES1/SLC4A8/NUBPL/SIRT3/RAB3GAP2/ZNF566/IFT80…
GSE46606_IRF4_KO_VS_WT_UNSTIM_BCELL_DN	C7_immunologic	198	0.457235	2.09677	2.30616e-09	1.99904e-07	2791	tags=28%, list=13%, signal=24%	TNF/CXCL3/HDC/CXCL10/CCL4/RELB/CEBPD/HCAR2/ZC3H12A/BCL2A1/CD69/CLDN6/IL2RG/HCK/STRA6/NFKBIA/TNFAIP3/FILIP1L/MCEMP1/NFKBIE/CHST1/CYBB/GCH1/GOLGA7B/RAB11FIP1/TNFAIP2/NFKB2/BIRC3/TRPM2/NLRP3/ETS2/UTF1/PROB1/SOCS3/RGS9/HAPLN3/ABTB2/CYSRT1/TRAF1/HMGCS2/HIVEP1/CCL22/SLC31A2/LRP3/RND3/PRRG3/HLA-B/IRF7/PDE4B/CSF3/ZBP1/VASP/C3/LCN2/FAS
MODULE_263	C4_computational	45	0.704723	2.50003	2.33154e-09	2.01538e-07	951	tags=38%, list=4%, signal=36%	CCL3/CXCL8/CXCL1/CXCL10/CCL4/PLAU/CXCL2/CCL2/XCL1/PLAUR/CXCL11/C5AR1/CCR1/FPR1/CXCL9/FPR2/C3AR1
GSE27241_CTRL_VS_DIGOXIN_TREATED_CD4_TCELL_IN_TH17_POLARIZING_CONDITIONS_UP	C7_immunologic	154	0.496895	2.19329	2.39029e-09	2.06039e-07	1909	tags=25%, list=9%, signal=23%	CXCL10/DUSP2/TCF7/ICAM1/IER3/TRIB1/STX11/IL21R/GPR183/RELB/PDCD1/LTA/ZC3H12A/EGR2/CD69/XCL1/NR4A3/GADD45B/NFKBIA/MAP3K8/TNFAIP3/PLIN2/MCAM/UBASH3A/PLK2/FPR1/CXCL9/PTH1R/NFKBID/NFKB2/BIRC3/NR4A1/PTGER4/ARL5B/REL/NFKB1/NAB2/PRR9
GSE30971_CTRL_VS_LPS_STIM_MACROPHAGE_WBP7_KO_2H_UP	C7_immunologic	190	0.471899	2.14946	2.5635e-09	2.19817e-07	2706	tags=32%, list=12%, signal=28%	TNF/ADM/PTX3/HCAR3/IL2RA/TNFRSF9/G0S2/F3/IER3/HAS1/IL6/SH3BP5/AQP9/CXCL2/ZC3H12A/BCL2A1/SOCS1/GADD45B/SLC2A3/IER5/NFKBIA/MCEMP1/UPP1/PTGS2/OLIG1/KCNJ2/OLIG2/PRR16/SLAMF1/ABCA1/BASP1/CASP5/FPR2/MIR3142HG/CDC42EP3/ELL2/ETS2/MFSD2A/SOCS3/HES1/PFKFB3/TNFAIP6/MET/NFKB1/MYO1G/PIM1/CLIC4/OSGIN2/ZBTB43/OSM/DENND3/IL10/TMEFF1/ACOD1/SLC1A2/CDKN2A/CPM/CCL18/MIR3945HG/ZBTB10
BLANCO_MELO_BETA_INTERFERON_TREATED_BRONCHIAL_EPITHELIAL_CELLS_UP	C2_curated	358	0.39106	1.91334	2.56438e-09	2.19817e-07	2855	tags=24%, list=13%, signal=21%	CXCL8/CXCL3/INHBA/B3GNT7/THBS1/HCAR3/HBEGF/CSF1/PHLDA1/DUSP2/CCNA1/HAS2/G0S2/PMAIP1/SOWAHC/IL23A/RELB/IL6/HCAR2/CREB5/SDC4/CXCL2/DUSP4/BCL2A1/SOCS1/APOBEC3A/PLD5/PLAUR/TNFAIP3/TMEM158/WNT9A/PTGS2/GBP5/CSF2/SEMA7A/SPRY2/ZPLD1/EDIL3/PAMR1/GBP1/GBP2/ZMYND15/WNT10A/ABCA1/SYT12/KLF6/NCALD/CSRNP1/AXL/BIRC3/NT5E/IRF1/NECTIN3/EDN1/IFIT3/SOCS3/RELL1/RNF19B/CLDN1/TMEM47/TAP1/ARL5B/IFIT2/FGF5/IL15RA/C1S/MSX…
GSE39110_UNTREATED_VS_IL2_TREATED_CD8_TCELL_DAY6_POST_IMMUNIZATION_UP	C7_immunologic	192	0.459323	2.09107	2.84361e-09	2.43078e-07	2501	tags=27%, list=12%, signal=24%	LGALS1/CD7/CCL5/DUSP5/IL2RA/IL10RA/GAS7/IER3/ITGB7/IL2RB/NKG7/SGK1/AQP9/RASL11A/PLP2/SLC2A3/MYL4/N4BP3/ANXA1/METRNL/CSF2/ITGAX/GATA3/KCNK5/CLDND2/BHLHE40/PAK6/PRDM1/RARA/ACTN2/KLRG1/NRARP/MYADM/RUNX3/IGFBP6/EFHD2/AHNAK/ARL4D/C15orf48/IFITM2/ROM1/EPSTI1/VIM/MYO1G/ZYX/ADAM8/GZMB/LGALS3/P2RY14/SAMHD1/GGT1/IL12RB2
LENAOUR_DENDRITIC_CELL_MATURATION_DN	C2_curated	126	0.524607	2.2533	3.09545e-09	2.63875e-07	1424	tags=27%, list=7%, signal=25%	TNF/CXCL8/CXCL3/KYNU/IER3/MMP9/SERPINA1/FCN1/S100A9/CXCL2/SDC2/S100A12/NINJ1/S100A8/IL2RG/ISG15/NFKBIA/PLAUR/CLEC2B/PPIF/NMB/FCER1G/CYBB/SERPINF1/C5AR1/FCGR2A/CHI3L1/MARCKSL1/EMP3/CORO1A/C3AR1/CSF1R/LST1/TNFRSF1B
BURTON_ADIPOGENESIS_1	C2_curated	30	0.776335	2.50468	3.21308e-09	2.73147e-07	2098	tags=63%, list=10%, signal=57%	PHLDA1/DUSP2/IER3/IL6/CEBPD/DLX2/SGK1/ARL4C/BAG3/VEGFA/RHOB/THBD/ELL2/ETS2/CEBPB/NFIL3/DNAJB4/MAFF/FOSL2
GSE6259_33D1_POS_VS_DEC205_POS_FLT3L_INDUCED_SPLENIC_DC_UP	C7_immunologic	169	0.467126	2.08765	3.27652e-09	2.7744e-07	1608	tags=21%, list=7%, signal=20%	CCL3/DUSP8/CCL5/PHLDA1/CCL4/SLC15A3/TREM1/F3/IER3/SOWAHC/HAS1/CXCL2/ZC3H12A/HPGD/EGR2/IFITM1/SERPINB2/TNFAIP3/DSEL/UPP1/PTGS2/PDE10A/RCVRN/FXYD2/RAB11FIP1/FPR1/CD33/CSRNP1/ETS2/EDN1/TLR7/TNFRSF1B/NR4A1/ABTB2/AHR/TRAF1
GSE24634_IL4_VS_CTRL_TREATED_NAIVE_CD4_TCELL_DAY3_DN	C7_immunologic	193	0.455866	2.07808	3.29055e-09	2.7744e-07	2291	tags=25%, list=11%, signal=22%	ADM/CXCL8/EGR4/CXCL1/CXCL3/INHBA/CXCL10/THBS1/TCF7/ITGB7/SERPINA1/SH3BP5/LTB/CCL2/BCL2A1/IFITM1/ZAP70/CD6/LGALS3BP/ISG15/SERPINB2/CXCL11/CLEC2B/STAT1/GPR65/GBP1/CSGALNACT1/GBP2/CYBB/GCH1/CHI3L1/CXCL9/CHI3L2/LILRA1/IRF1/IFIT3/GNAT1/IFITM2/CALCOCO2/TNFAIP6/TAP1/IL15RA/ALOX5AP/DDIT3/PIM1/ADAMDEC1/IRF7/SAMHD1
GSE46606_UNSTIM_VS_CD40L_IL2_IL5_1DAY_STIMULATED_IRF4MID_SORTED_BCELL_UP	C7_immunologic	193	0.455642	2.07706	3.29055e-09	2.7744e-07	2110	tags=22%, list=10%, signal=20%	TNF/CXCL3/EPS8/PHLDA1/SLC15A3/ICAM1/RAB20/SOWAHC/IL6/LTA/LDLR/NR4A3/IER5/SERPINB2/GPR174/MAP3K8/TNFAIP3/PTGS2/FAM83D/PRDM1/MARCKSL1/CH25H/NFKBID/TNFAIP2/CSRNP1/PIK3R2/IZUMO4/ZFP36/ELMSAN1/RAI2/GADD45A/ETS2/NFKBIB/SOCS3/ID2/TRAF1/HMGA1/GEM/GLIS3/MAFF/ADAM8/HSPE1
MODULE_108	C4_computational	56	0.651341	2.40994	3.58131e-09	3.01133e-07	1208	tags=36%, list=6%, signal=34%	CCL3/CXCL8/CXCL1/CXCL10/CCL4/CXCR3/PLAU/CXCL2/CCL2/XCL1/PLAUR/CXCL11/C5AR1/FOSL1/CCR1/FPR1/CXCL9/FPR2/C3AR1/NOVA1
TAVOR_CEBPA_TARGETS_UP	C2_curated	51	0.666244	2.40769	3.6606e-09	3.06963e-07	2718	tags=51%, list=13%, signal=45%	PTX3/CD7/ARC/HCAR3/IL1RN/TRIB1/S100A9/PTPN3/BCL2A1/RGS2/RAB31/ANXA1/GBP1/EEF1A2/SERPINF1/GCH1/HMOX1/C3AR1/LST1/TRDC/ID2/NFIL3/BTG2/ARHGEF5/TRGC2/SERTAD2
HOSHIDA_LIVER_CANCER_SUBCLASS_S1	C2_curated	231	0.432282	2.01284	3.75124e-09	3.12864e-07	3538	tags=30%, list=16%, signal=26%	CCL3/CXCL1/LGALS1/CCL5/DUSP5/IER3/COL6A2/COL1A2/IL2RB/S100A10/IGKC/CCR7/BCL2A1/PLP2/IL2RG/LGALS3BP/RAB31/COL6A1/PLAUR/CYP1B1/ANXA1/CD48/EFEMP1/CYBB/FCGR2A/CD3D/IFI30/CORO1A/RNASE6/C3AR1/SLC7A5/LSP1/IRF1/IQGAP1/PCLAF/TNFRSF1B/PIM2/CDH11/ITGB2/GEM/TMSB4X/IL15RA/FHL3/GYPC/ALOX5AP/MTHFD2/S100A11/IGFBP5/ADAM8/IGLL1/TUBA4A/COL3A1/CYBA/MAP1B/CD8A/ALDOA/HIF1A/LOX/COL11A1/RHOA/FBRS/PFN1/LGALS9/LCP1/ME1/RI…
MORF_UBE2I	C4_computational	231	0.432287	2.01286	3.75124e-09	3.12864e-07	10154	tags=76%, list=47%, signal=41%	UBC/CLIC1/SLC25A6/CFL1/COX6A1/EIF4G2/ATF4/HSP90AA1/ACTG1/RHOA/COX8A/EBP/PSMB1/LYPLA2/YBX1/NUDT1/TUFM/SEC61B/UBB/SNRPB/BCL7B/GNAS/UQCRFS1/COX4I1/RBM3/PTP4A2/YWHAQ/FAU/SRP14/PSMB3/RPLP2/HDGF/STRAP/TUBA1B/PTMA/RPS27A/OTUB1/PSMD8/COX5B/SET/HNRNPAB/SENP3/CYC1/TBCB/EIF6/RPL6/EIF4H/KHDRBS1/SLC25A3/PGK1/RPL19/RPL14/EIF3I/HSP90AB1/PHB2/RPS5/ANP32B/EIF3K/PUF60/SNRPE/PPP2CA/PSMB7/RPL27/CS/CDV3/ZC3H15/DDX49/…
MANNO_MIDBRAIN_NEUROTYPES_HPERIC	C8_cellSignature	768	0.313178	1.63206	3.97183e-09	3.30369e-07	2980	tags=23%, list=14%, signal=21%	HBG1/HBG2/RRAD/LGALS1/DUSP5/HBEGF/EPS8/SPRY4/PHLDA1/NFATC4/HIC1/STOML3/ADGRA2/TESC/FOXC1/F3/BCL3/HTRA3/ECE1/COL1A2/OLFML3/CEBPD/HCST/CHSY3/HSPA2/CXCL2/CD248/CCL2/ATF3/GALNT18/EGR2/PDLIM1/S1PR3/IFITM1/MT2A/LRRC32/MIR22HG/NR4A3/TWIST1/LGALS3BP/GADD45B/GPER1/SLC38A11/ISG15/SLC2A3/TIMP1/COL6A1/BCL6/HBA2/MRC2/PLAUR/TNFAIP3/FILIP1L/TUBB6/APOE/JUNB/CDKN1A/PTGS2/HES4/RGL1/TMEM74B/CRISPLD2/LMNA/SERTAD1/PA…
FOSTER_TOLERANT_MACROPHAGE_DN	C2_curated	399	0.369956	1.83518	4.23189e-09	3.51054e-07	2291	tags=22%, list=11%, signal=20%	PTX3/CP/TNFSF9/CXCL1/HDC/GNG4/DUSP5/HBEGF/CSF1/GPR84/DUSP2/TNFRSF12A/IL4I1/BCL3/CD83/S100A10/IL6/CEBPD/CREB5/SDC4/CXCL2/CNN3/SERPINE1/GADD45G/CD69/SOCS1/RND1/ZBTB32/MAP3K8/PLAUR/TNFAIP3/FILIP1L/LCK/TUBB6/JUNB/CDKN1A/UPP1/PTGS2/CXCL11/LMNA/SERTAD1/RIPK2/JDP2/CH25H/NFKBID/MTFR2/GNA15/ICOSLG/GBP7/EZR/CSRNP1/ZFP36/MYADM/PARP8/SLC2A6/EDN1/POU3F1/NECTIN2/NECTIN4/FSCN1/SOCS3/HOMER1/RAP2C/ABTB2/PFKFB3/TR…
GSE2706_UNSTIM_VS_8H_LPS_AND_R848_DC_DN	C7_immunologic	188	0.459165	2.09314	4.41106e-09	3.64936e-07	2229	tags=28%, list=10%, signal=26%	IRF8/TNFRSF4/CXCL3/CXCL10/DUSP5/TFPI2/ICAM1/CD70/TUBB2A/STX11/SERPINA1/CLCF1/RELB/LILRA5/LTA/DUSP4/GADD45B/CHAC1/MAP3K8/DNAAF1/HES4/CXCL11/IRAK2/RIPK2/KCNJ2/SAT1/GCH1/CHST7/PELI1/CXCL9/C17orf58/TNFAIP2/IDO2/CSRNP1/GADD45A/IRF1/MFSD2A/SOCS3/PIM2/PTGER4/HOMER1/C15orf48/CLDN1/REL/C4orf46/HIVEP1/NFKB1/RGS1/TNFSF8/GRHL1/WNT4/FLJ13224/IRF7
GO_RESPONSE_TO_INTERLEUKIN_1	C5_GO	201	0.453144	2.08559	4.46203e-09	3.68165e-07	4806	tags=41%, list=22%, signal=32%	CCL3/CXCL8/CCL5/CCL4/IL1RN/HAS2/ICAM1/IL1RAP/IL6/CCL2/ZC3H12A/XCL1/NFKBIA/MAP3K8/ANXA1/IRAK2/KLF2/RIPK2/GBP1/PRKCA/GBP2/CHI3L1/PELI1/CCL3L3/PSMA8/CCL3L1/UBC/EDN1/CEBPB/TRIM63/MYLK3/DAB2IP/NFKB1/CCL22/SOX9/CCL19/ANKRD1/FGG/CCL25/CYBA/ZBP1/ACOD1/IL17A/CCL18/HIF1A/LCN2/HYAL3/PSMA1/PSMD9/PSMB5/TAF9/PSMD7/PSMB2/PSMB1/CCL15/IRAK1/LGALS9/PSMA2/ADAMTS12/UBB/NOD2/TNIP2/CITED1/EGR1/CCL1/XCL2/CD38/NLRP7/PSM…
MIR371B_5P	C3_motif	934	-0.316222	-1.63868	4.78215e-09	3.93527e-07	5019	tags=33%, list=23%, signal=26%	TOGARAM1/VPS53/LATS1/ZNF124/HUS1/SNX1/TCTN2/ARID5B/RARS2/LY75/BBIP1/SPECC1/HMBOX1/C16orf54/EXOC5/KIAA1143/SKA2/TRIM59/TRIM5/PNISR/APOL2/SLC35F6/ELK4/TMX1/NSL1/TMEM120B/ZNF850/C3orf70/TRIM13/CLCC1/DUSP3/NLK/KRBOX4/FNDC3A/OSBPL10/FBXW2/CEP70/NLRC3/CA5B/SLC48A1/ZCCHC14/PCDHB16/ZNF611/COLCA1/GLG1/ZBTB25/LPP/TMEM184C/UCK2/ZNF770/PDE7A/METTL6/RAD54L2/ZNF260/SMAD4/IBA57/ZSCAN2/UTP20/GTPBP3/RIMKLB/ZNF557…
GSE26343_WT_VS_NFAT5_KO_MACROPHAGE_DN	C7_immunologic	196	0.455187	2.08488	4.86897e-09	3.99605e-07	3841	tags=33%, list=18%, signal=28%	ADM/RRAD/CCL5/DUSP5/HBEGF/MARCKS/SLC15A3/CD70/OASL/CLCF1/GPR183/NR4A3/SERPINB2/MAP3K8/PCDH7/TUBB6/JUNB/CSF2/GPR65/RIPK2/EPOP/GBP2/PRDM1/BCL2L14/TNFAIP2/RASAL1/GPR132/EBI3/SOCS3/TNFRSF1B/NOTUM/FCER2/PAPSS2/ARL5B/NRP2/MYO1G/GRHL1/OSGIN2/IRF7/SLC22A4/TMEM176B/IL10/CSF3/SGMS2/UBXN2A/RHOF/CD82/GTF2B/SLC39A4/MKNK2/HSPA1B/FAS/LYNX1/FBRS/SBDS/EFNA2/MAMLD1/NAMPT/ADORA2A/NFE2L2/CDYL2/BCOR/IDI1/EXOC3L4/ZNF5…
GSE10325_LUPUS_CD4_TCELL_VS_LUPUS_MYELOID_DN	C7_immunologic	196	0.45493	2.0837	4.93706e-09	4.04119e-07	1508	tags=24%, list=7%, signal=23%	IRF8/IL1RN/MARCKS/KYNU/GAS7/SLC15A3/SERPINA1/CEBPD/FCN1/S100A9/S100A12/APOBEC3A/HCK/RAB31/HLX/CLEC7A/TYROBP/PLAUR/CYP1B1/TST/CRISPLD2/ITGAX/MILR1/MAFB/KCNJ2/FCER1G/CYBB/C5AR1/FCGR2A/CCR1/IFI30/CAMK1/HMOX1/FPR1/BASP1/RNASE6/TNFAIP2/CSF1R/LILRB3/HSPA6/CSTA/NLRP3/SLC2A6/CEBPB/LST1/CFD/NCF2
KAECH_NAIVE_VS_MEMORY_CD8_TCELL_DN	C7_immunologic	196	0.454677	2.08254	5.14135e-09	4.19728e-07	3222	tags=29%, list=15%, signal=25%	PRF1/LGALS1/CD7/CCL5/CCL4/SH2D1A/IL10RA/CXCR3/ITGB7/S100A10/AQP9/BCL2A1/GADD45B/BAG3/TNFAIP3/ANXA1/CRTAM/SH2D2A/ITGAX/FGR/GATA3/BHLHE40/ADGRE5/KLF6/KLRG1/ELL2/CST7/UBC/ACOT7/CD160/EFHD2/PCLAF/OPRK1/ANXA2/TNFRSF1B/AHNAK/ID2/RNF19B/PGLYRP1/ITGB2/IL18RAP/PIM1/S100A11/FRMD5/GZMB/FGF19/PGAM1/DAPK2/HLA-A/CTSW/ODC1/TXN/LYPLA2/HMGB2/EMP1/POLR2L/MYO1F
GSE21670_UNTREATED_VS_TGFB_TREATED_CD4_TCELL_DN	C7_immunologic	197	-0.470152	-2.09993	5.21374e-09	4.24181e-07	3387	tags=34%, list=16%, signal=29%	ST6GALNAC5/TMBIM1/SCAI/TTC28/VPS54/PALLD/USP54/RAI14/PCMTD1/FGD3/PTGS1/MTAP/ITSN1/RBM5/COL4A2/MBLAC2/CD200/IFIT1B/TPRG1L/FRY/ENO2/NFE2/WBP1L/ATP10D/METTL7A/IFT43/ALDOC/ADAM22/MED12L/DLG2/PDZK1IP1/RASSF6/LGALS4/SIX5/STXBP4/EXOC6B/RDH5/CAMSAP3/PABPC4L/ICK/COL4A1/ZNF862/PRKG1/FSTL1/CAPS2/KLHDC1/IRF6/NPR2/FMO5/BHLHB9/LDHD/GPRASP2/KRT18/RAB38/NBEA/PLSCR4/RNASEL/PLXDC2/CDC14B/PRDM16/SYDE1/SLC16A9/CBX7/…
BILD_HRAS_ONCOGENIC_SIGNATURE	C2_curated	241	0.431528	2.02835	5.22339e-09	4.24181e-07	1690	tags=24%, list=8%, signal=22%	PTX3/CXCL8/CXCL1/STX1A/CXCL3/LIF/DUSP5/HBEGF/SPRY4/PHLDA2/PDGFA/IL11/CCNA1/TNFRSF12A/G0S2/TFPI2/IER3/TRIB1/CLCF1/SDC4/CXCL2/ADAMTS15/LDLR/DUSP4/SOCS1/PTHLH/SLC2A3/TIMP1/BCL6/SERPINB2/EPHA4/PLAUR/CYP1B1/JUNB/UPP1/PTGS2/SESN2/ULBP2/PPIF/C6orf141/VEGFA/FOSL1/SFN/ABCA1/KLF6/IER2/ZFP36/NT5E/ACOT7/MFSD2A/B3GNT5/PNMA2/HOXC6/ITPRIP/MAP1LC3B/IRX2/MEG3
SENESE_HDAC1_AND_HDAC2_TARGETS_UP	C2_curated	230	0.430718	2.01079	5.30053e-09	4.29097e-07	2855	tags=28%, list=13%, signal=24%	PTX3/CXCL8/CXCL3/GPR3/NRIP3/IL11/TNFRSF12A/HAS2/G0S2/KYNU/MMP9/SERPINA1/PLAU/LTB/GFPT2/PAX8/ZC3H12A/SYTL3/BCL2A1/RGS2/SERPINB2/EPHA4/PLAUR/TNFAIP3/TMEM158/IRAK2/CSF2/ULBP2/PPIF/LDB2/GCH1/FOSL1/TCN1/PRDM1/PDLIM4/NFKB2/BIRC3/PGF/SH2B3/SH3PXD2A-AS1/IQGAP1/CCNE1/DKK2/C15orf54/EGFR/HMGA1/TIE1/GEM/COL6A3/C4orf46/CHRNA9/PDE4D/LPXN/PRR9/MAFF/MICAL2/PPTC7/OLAH/RBPMS2/TMEM200A/C3/SLC39A4/LINC00326/UBASH3B
MARKEY_RB1_ACUTE_LOF_DN	C2_curated	224	0.435422	2.03291	5.31174e-09	4.29097e-07	3305	tags=31%, list=15%, signal=27%	CCL3/TNFSF9/CXCL3/CCL5/CXCL10/DDX3Y/SLFN12L/LDLR/BCL2A1/LGALS3BP/HCK/ISG15/TYROBP/PLIN2/STAT1/ITGAX/SEMA7A/SAT1/BHLHE40/GBP2/CCR1/FPR1/ABCA1/CH25H/C3AR1/CSF1R/GBP7/CLEC4D/NT5E/GADD45A/LST1/PLEKHO1/IQGAP1/IFIT3/SOCS3/MPEG1/NCF2/CCL4L2/FCGR1A/TAP1/HP/ITGB2/IRGM/IFIT2/B3GNT2/LILRB4/DDIT3/PLA2G7/IGFBP5/ITGAM/ADAM8/GZMB/CPXM2/HLA-B/IRF7/ISG20/CD300C/ACOD1/CMPK2/OPRPN/NCF1/PDK1/USP18/HLA-A/CD52/KRT7/LY…
MIR335_3P	C3_motif	852	-0.322905	-1.6595	5.371e-09	4.32752e-07	4331	tags=28%, list=20%, signal=24%	VPS13B/ATAD1/RIMKLB/PHIP/MBTD1/TTC21B/VCAN/MCTP2/NRIP1/KMT5B/ZNF23/SATB2/HDAC9/TBL1XR1/ANKRD50/SLC9A7/PIN4/MRE11/HERC2/LCORL/SGK3/PAX6/XYLB/CD200R1/NHSL1/SENP6/SEPSECS/TMTC1/MAP7/FOS/TTC33/CREBZF/HERC3/BPTF/ARID1B/TAOK3/BROX/SLC36A4/MEX3A/RFX3/PDE1C/FBXO4/CD109/VAPB/KALRN/SLC19A2/SEL1L/NCOA2/HLCS/DISC1/PARP11/PTAR1/PCGF5/CYP7A1/POU2F1/TMEM106B/CCSER1/PRR14L/CPNE3/PIKFYVE/TTC30B/OPN3/ADAM12/GPAM/A…
GO_ERK1_AND_ERK2_CASCADE	C5_GO	298	0.399931	1.91895	5.45153e-09	4.38096e-07	2437	tags=25%, list=11%, signal=22%	TNF/CCL3/LIF/CCL5/SPRY4/CCL4/PDGFA/ICAM1/GPR183/CCL2/ATF3/GPBAR1/CCR7/SEMA6A/DUSP4/XCL1/NTRK1/GPER1/TNFSF11/DUSP10/HAVCR2/APOE/FGF21/SEMA7A/RIPK2/SPRY2/GBP1/FAM83D/PRKCA/C5AR1/CHI3L1/CCR1/SLAMF1/APELA/SPRY1/NOX4/FPR2/CCL3L3/CSF1R/CAMK2N1/EZR/CCL3L1/TNFAIP8L3/PDGFB/SPRED3/PLA2G2A/ADCYAP1/PTGER4/FFAR4/IGF1/GLIPR2/EGFR/LMO3/CHRNA9/DAB2IP/DDT/CCL22/SOX9/CCL19/HCRTR1/C1QL4/GCG/TGFB1/OPRM1/ERBB4/TIMP3/…
MIR6833_3P	C3_motif	400	-0.388911	-1.87925	5.63604e-09	4.51747e-07	3494	tags=32%, list=16%, signal=27%	PSD3/SLC12A6/ATF7IP/RPS6KA6/SYNPO2/ATP6V1C1/PIP4K2B/SPOP/MBOAT2/TRAK2/CHD9/ZNF701/NFIX/RIN2/SCAI/ZNF761/SLAIN1/C22orf46/KCNK6/MSI2/PURA/TMEM245/REEP3/DTNA/SLC8A3/SLC4A8/DLG3/SIRT3/ZNF189/SNX13/SOBP/MAP2/SYNJ2BP/TNRC6B/PDK3/TREML4/ZSWIM6/ZNF90/ZNF544/SH3PXD2A/IL20RB/PLXNA2/ZSCAN22/ZNF37A/LTN1/ZNF558/RTN4RL1/ZNF117/GALNT15/ZNF730/ZNF420/ZNF813/ZNF302/FANCL/GCLM/ZNF816/CDON/KRIT1/ZFP62/CADM2/CYB561D…
MODULE_33	C4_computational	377	0.3782	1.85879	5.69717e-09	4.55464e-07	3243	tags=27%, list=15%, signal=23%	RPS4Y1/ADM/KDM5D/PTX3/WT1-AS/CCL5/CXCL10/ARC/THBS1/HCAR3/PHLDA2/CCNA1/FEZ1/MARCKS/TPSAB1/CD70/ITGB7/MMP9/PDCD1/FCN1/FBLN2/LTB/PTPN3/TNNI1/DUSP4/GHRHR/KCNQ2/CD6/KCNH2/LGALS3BP/SLC28A1/HCK/COL6A1/BCL6/MYL4/EPHA4/CNR2/CLEC2B/PRAME/FXYD2/TRIB2/PTPRH/CYBB/GCH1/C5AR1/CHIT1/UGT8/BPI/PTH1R/CORO1A/CDC42EP1/C3AR1/IRS1/LTBP1/TNFAIP2/NTSR1/NGF/LSP1/CD27/IGFBP6/POU3F1/LST1/CCNE1/OPRK1/FURIN/CFD/PFKFB3/TNFAIP6…
ZNF22_TARGET_GENES	C3_motif	935	-0.314523	-1.62955	5.73592e-09	4.57377e-07	4651	tags=30%, list=21%, signal=25%	DHX36/STK36/ABCD4/ATP6V1E2/COQ9/BBS1/SRRD/HCFC2/ATP6V0A1/ZDHHC17/DLG1/ALG10/MZF1/MYO19/LPP/UCK2/LCA5L/RNF217/NT5M/CCNB3/UBR1/TNKS/WDR7/UBAC2/WDR54/ACVR2A/VPS8/ZNF624/AASDHPPT/CRYGD/PAXBP1/FIG4/TBL1XR1/CMBL/TICRR/FBXO46/LONP2/MAST2/WDR36/LCORL/NBR1/ZNF419/ZNF438/TRDMT1/DNAH14/DOCK7/TMTC1/AGPAT4/DYNC2LI1/CCM2/NT5DC1/NCOA6/AHI1/TFCP2/MAPK14/KALRN/CHMP6/TRAPPC12/HLCS/HDAC8/PPFIA1/EPM2A/COQ5/TXNRD2/SL…
HALLMARK_IL2_STAT5_SIGNALING	Hallmark	198	0.4502	2.06451	5.92072e-09	4.70896e-07	2065	tags=26%, list=10%, signal=24%	IRF8/TNFRSF4/TNFRSF18/LIF/CXCL10/SPRY4/CSF1/PHLDA1/PLPP1/IL2RA/TNFRSF9/IL10RA/IL1RL1/SPP1/ETV4/CD83/IL2RB/IRF4/LTB/SOCS1/GADD45B/SLC2A3/TNFSF11/COL6A1/MAP3K8/CD48/PLIN2/CCR4/CSF2/GPR65/BHLHE40/RHOB/KLF6/PTH1R/DHRS3/NT5E/CST7/CCNE1/FURIN/TLR7/TNFRSF1B/ICOS/AHNAK/AHR/TRAF1/GLIPR2/FLT3LG/NFIL3/DRC1/PIM1/MAFF
GSE29164_UNTREATED_VS_CD8_TCELL_TREATED_MELANOMA_DAY7_UP	C7_immunologic	198	0.450026	2.06371	6.05605e-09	4.80421e-07	3263	tags=26%, list=15%, signal=22%	IRF8/TNFRSF18/PRF1/CCL5/MARCKS/JCHAIN/CXCR3/IL4I1/ICAM1/MMP9/S100A10/IL12RB1/SOAT2/BCL2A1/DOK2/ZAP70/TYROBP/MAP3K8/ANXA1/APOE/PLIN2/BHLHE40/CSF1R/ELL2/ACOT7/CCR9/CD160/SLC35B2/TNFRSF1B/ID2/SLC3A2/GEM/IL18RAP/PLA2G7/CXXC5/MAPKAPK2/TMEM176B/SLC35B1/CYBA/IL4/CD82/ITM2C/ALDOA/CTSW/CD93/SEPHS2/PCGF2/MYO1F/PHPT1/NUDT1/HPN
JAK2_DN.V1_DN	C6_oncogenic	128	-0.533675	-2.24469	6.22332e-09	4.92425e-07	5099	tags=52%, list=23%, signal=40%	CEP152/ZNF721/VPS53/DMTF1/PNISR/DOCK5/PEX3/PHC3/ANKRD36B/OXNAD1/SNRPN/PCDHB13/KMT2A/TNRC18/MBTD1/IKZF2/NEAT1/CEP295/ECM2/HOXA7/RFX3/ZBTB44/CDH3/HCG18/DBF4B/C8orf44/TMEM245/FLCN/CEP41/SIGLEC15/SLC27A3/ABHD18/CMC1/CTTNBP2NL/SOCS7/CARF/SEC31B/MYO15B/CSAD/ZNF550/KIF13A/ZNF280D/DIP2A/ADAMTSL4/FAN1/AMT/PVT1/TMEM163/LINC00937/NPIPB4/MYBL1/GOLGA8B/OXTR/ATM/ALDH8A1/MROH7/ZNF221/GOLGA8A/SLC15A2/NAALAD2/CAP…
GSE14386_UNTREATED_VS_IFNA_TREATED_ACT_PBMC_MS_PATIENT_DN	C7_immunologic	155	0.48321	2.12951	6.27365e-09	4.95137e-07	2379	tags=29%, list=11%, signal=26%	TNFRSF4/TNFRSF18/CXCL10/PHLDA1/TNFRSF9/IL1RL1/STX11/IRF4/PDCD1/CCL2/MPO/PACSIN1/XCL1/MT2A/PRTN3/PLIN2/AREG/IFI30/PPP1R16B/FPR1/PDE7B/MS4A3/IER2/SULT2B1/BIRC3/ETS2/CCR9/CD160/MFSD2A/TIGIT/IFIT3/TLR7/NR4A1/ITM2A/PLK4/ROM1/HEXIM1/NFIL3/PDE4D/ORC1/MAFF/IRF7/ISG20/TOX/BCL2L11
CUI_DEVELOPING_HEART_VALVAR_ENDOTHELIAL_CELL	C8_cellSignature	137	0.498862	2.15104	6.4614e-09	5.08654e-07	2210	tags=36%, list=10%, signal=32%	CXCL8/CXCL1/DUSP5/HBEGF/CCL4/DUSP2/FEZ1/MTRNR2L1/TFPI2/TUBB2A/S100A10/CEBPD/HS3ST1/CXCL2/ATF3/LDLR/PDLIM1/MT2A/PTHLH/MMP19/NR4A3/IER5/CYP1B1/CDKN1A/PLIN2/PTGS2/CRYAB/EDIL3/SERPINF1/ANK2/THBD/GADD45A/SOCS3/NTRK2/PLA2G2A/DKK2/NR4A1/ITPRIP/TNFAIP6/GEM/PI16/NFIL3/S100B/WNT4/TIPARP/MAFF/IGFBP5/FOSL2/HLA-B
HINATA_NFKB_IMMU_INF	C6_oncogenic	15	0.890133	2.40897	6.57497e-09	5.16277e-07	1813	tags=73%, list=8%, signal=67%	PTX3/CXCL8/CXCL3/ICAM1/CD83/IL6/CXCL2/NFKBIA/TNFAIP2/IRF1/NFKB1
GO_REGULATION_OF_LYMPHOCYTE_DIFFERENTIATION	C5_GO	177	0.473094	2.13725	6.59737e-09	5.16721e-07	2573	tags=30%, list=12%, signal=27%	TNFRSF18/TNFSF9/INHBA/IL2RA/TCF7/HLA-G/CD83/IL23A/IRF4/IL12RB1/CD28/ZC3H12A/FOXJ1/SOCS1/ZAP70/BCL6/HLX/DUSP10/ANXA1/TBX21/CRTAM/LEF1/SHH/RIPK2/GATA3/EGR3/PRDM1/ZNF683/RARA/NFKBID/NRARP/AXL/NLRP3/CD27/RUNX3/IRF1/SOX4/ID2/TLR9/PGLYRP1/FCRL3/FLT3LG/SPINK5/LILRB4/CCL19/ADAM8/SMAD7/ZFP36L1/FOXN1/TOX/GLI2/SLC46A2/IL4
GSE5589_LPS_VS_LPS_AND_IL10_STIM_IL10_KO_MACROPHAGE_45MIN_DN	C7_immunologic	195	0.458471	2.09978	6.69333e-09	5.2291e-07	2491	tags=29%, list=11%, signal=26%	CP/CXCL10/DUSP2/SH2D1A/G0S2/KYNU/HLA-G/ITGB7/GADD45G/ADGRG5/NEDD9/S100A8/NR4A3/IER5/TNFAIP3/LCK/CXCL11/CDKN2D/CRISPLD2/ITGAX/ESAM/PITPNM1/GBP2/CD3D/GP9/FPR1/CORO1A/MSR1/FAM131B/LSP1/RUNX3/SLC2A6/PRG3/FCGR3A/NFKBIB/IFIT3/B3GNT5/ICOS/ZCCHC18/FCGR1A/SPIB/IRGM/IFIT2/L1CAM/SNRPC/SIPA1L1/RGS1/DDIT3/CLIC4/NXT1/CDC25A/SAMHD1/OSM/CCDC167/ALAS1/ZBP1
GO_RESPONSE_TO_CHEMOKINE	C5_GO	95	0.565228	2.30416	6.87324e-09	5.35609e-07	2813	tags=35%, list=13%, signal=30%	CCL3/CXCL8/CXCL1/CXCL3/CCL5/CXCL10/CCL4/CXCR3/FOXC1/CXCL2/CCL2/ZC3H12A/CCR7/XCL1/CCR4/CXCL11/CCR1/CXCL9/CCL3L3/CCL3L1/CCR9/EDN1/SH2B3/CCL22/ACKR1/CCL19/SLIT2/CCR8/CCL25/CCL18/HIF1A/LOX/RHOA
GRAHAM_CML_QUIESCENT_VS_NORMAL_DIVIDING_UP	C2_curated	56	0.643798	2.38203	7.71676e-09	5.99827e-07	2065	tags=50%, list=10%, signal=45%	HBG1/CCL3/PTX3/CXCL8/INHBA/CCL5/CXCL10/IL1RN/TPSAB1/PMAIP1/TUBB2A/BCL3/CXCL2/GADD45B/SERPINB2/RRAS2/CYP1B1/APOE/PTGS2/CXCL11/GBP1/APOC1/HBA1/RGCC/DDIT4/CCL19/RGS1/MAFF
MIR616_5P	C3_motif	936	-0.313974	-1.62535	7.74315e-09	6.00366e-07	5019	tags=32%, list=23%, signal=26%	TOGARAM1/VPS53/LATS1/ZNF124/HUS1/SNX1/TCTN2/ARID5B/RARS2/LY75/BBIP1/SPECC1/HMBOX1/C16orf54/EXOC5/KIAA1143/SKA2/TRIM59/TRIM5/PNISR/APOL2/SLC35F6/ELK4/TMX1/NSL1/TMEM120B/ZNF850/C3orf70/TRIM13/CLCC1/DUSP3/NLK/KRBOX4/FNDC3A/OSBPL10/FBXW2/CEP70/NLRC3/CA5B/SLC48A1/ZCCHC14/PCDHB16/ZNF611/COLCA1/GLG1/ZBTB25/TMEM184C/UCK2/ZNF770/PDE7A/METTL6/RAD54L2/ZNF260/SMAD4/IBA57/ZSCAN2/UTP20/GTPBP3/RIMKLB/ZNF557/UMP…
GO_G_PROTEIN_COUPLED_RECEPTOR_BINDING	C5_GO	278	0.410251	1.95648	7.93921e-09	6.14025e-07	4636	tags=38%, list=21%, signal=30%	ROR2/CCL3/ADM/RTP5/CXCL8/CXCL1/CXCL3/CCL5/CXCL10/CCL4/FCN1/WNT10B/CXCL2/WNT1/PROK2/CCL2/XCL1/NPW/ADRB1/WNT9A/CXCL11/STAT1/WNT11/GAL/NMB/EDN3/WNT10A/S1PR1/APELA/FPR1/GHRL/CXCL9/CCL3L3/GPHA2/GNA15/CCL3L1/INSL3/MYOC/CNRIP1/SAG/S1PR2/EDN1/ADCYAP1/HOMER1/NTS/GNAT1/CALCB/ARRDC3/WNT5B/RSPO3/CCKBR/RTP2/CCL22/PDE4D/CCL19/GCG/CTHRC1/BDKRB2/WNT4/WNT9B/ASIP/CCL25/GNAI1/UCN2/C1QBP/CCL18/C3/HSPA1B/WNT5A/DRD3/C…
MIR373_5P	C3_motif	931	-0.313428	-1.62256	8.01406e-09	6.18265e-07	5019	tags=33%, list=23%, signal=26%	TOGARAM1/VPS53/LATS1/ZNF124/HUS1/SNX1/TCTN2/ARID5B/RARS2/LY75/BBIP1/SPECC1/HMBOX1/C16orf54/EXOC5/KIAA1143/SKA2/TRIM59/TRIM5/PNISR/APOL2/SLC35F6/ELK4/TMX1/NSL1/TMEM120B/ZNF850/C3orf70/TRIM13/CLCC1/DUSP3/NLK/KRBOX4/FNDC3A/OSBPL10/FBXW2/CEP70/NLRC3/CA5B/SLC48A1/ZCCHC14/PCDHB16/ZNF611/COLCA1/GLG1/ZBTB25/TMEM184C/UCK2/ZNF770/PDE7A/METTL6/RAD54L2/ZNF260/SMAD4/IBA57/ZSCAN2/UTP20/GTPBP3/RIMKLB/ZNF557/UMP…
SHEN_SMARCA2_TARGETS_UP	C2_curated	415	-0.38486	-1.85955	8.08523e-09	6.222e-07	6250	tags=38%, list=29%, signal=28%	PHKB/CUL4A/CTR9/SMAD2/NCOA1/KIAA0355/RDH14/REV1/XPO1/RSBN1/MAPK9/ANKHD1/TUBGCP3/UPF2/ZDHHC6/SETX/KDM3B/ATP6V0E1/CBX1/TTC37/AKAP11/SLTM/DPF2/NEMF/IDE/MAP4K5/HMG20A/ATF1/UNC50/CRYZL1/SLC30A5/MED14/ANKRD17/STAG1/WSB1/MRS2/ORC4/PUM2/ZFAND6/NF1/CDC23/RPRD1A/UBA3/LMBRD1/NFYB/BBIP1/VPS45/SOS2/KIDINS220/SLC25A46/OSBPL1A/PEX3/PON2/PSMC6/FMR1/EED/IDS/LEPROT/DCAF6/CUL4B/PEX11B/SMARCA2/LUC7L3/FBXW2/CAST/ZDHH…
WP_LUNG_FIBROSIS	C2_curated	62	0.625443	2.36276	8.15333e-09	6.2588e-07	3563	tags=55%, list=16%, signal=46%	TNF/CCL3/PTX3/CXCL8/CCL5/CCL4/PDGFA/SPP1/MMP9/SERPINA1/PLAU/IL6/CXCL2/CCL2/MT2A/TIMP1/CSF2/HMOX1/DSP/PDGFB/EDN1/CEBPB/IGF1/TGFB1/SMAD7/FGF1/CSF3/IL4/CMA1/FGF2/CYSLTR2/NFE2L2/BMP7/SFTPC
GCM_PTK2	C4_computational	142	-0.508117	-2.16683	8.21074e-09	6.28723e-07	5402	tags=44%, list=25%, signal=33%	USP32/TJAP1/ANKRD17/WSB1/RNF13/CCDC92/CAMK2G/PHLPP2/KIDINS220/GPRC5B/NIPA1/NLK/DLG1/SAP30L/SIK3/RABEP1/ZNF84/HERC2/AGPAT4/TEX2/KIAA1109/PKP4/RALGAPA1/PLEKHB1/CLASP2/ULK2/SLAIN1/USP33/KIF1B/ZNF565/RABGEF1/SNX27/DZIP3/ATRN/SESN3/DCUN1D4/FAM219A/TTYH2/APPBP2/FRYL/HERC4/UFSP2/BTRC/ABHD6/BBS2/FMNL2/TNS2/NCS1/MYO10/PTPRD/LARGE1/PLEKHA1/SPIRE1/ZFP14/TMOD2/PEG3/CNKSR2/FAXDC2/DNAJC6/DIRAS1/SHTN1/EPB41L3
GO_NEGATIVE_REGULATION_OF_CELL_POPULATION_PROLIFERATION	C5_GO	672	0.322267	1.66049	8.23338e-09	6.28896e-07	4618	tags=30%, list=21%, signal=24%	ROR2/TNF/ADM/CXCL8/CXCL1/INHBA/WT1/LIF/PTPN14/NPPC/THBS1/PLPP1/IL2RA/TNFRSF9/HLA-G/TESC/TRIB1/NGFR/IL6/SSTR2/LTA/WNT10B/SDC4/CCL2/POU1F1/SFRP4/FOXJ1/XCL1/PHOX2B/IFITM1/LRRC32/PTHLH/NTRK1/GPER1/TENM1/BCL6/TYROBP/DUSP10/TNFAIP3/CYP1B1/HAVCR2/CRTAM/APOE/CDKN1A/WNT9A/PTGS2/MSX2/CDKN2D/SHH/STAT1/LMNA/HPGDS/WNT11/SPRY2/GAL/GATA3/OVOL1/SERPINF1/FOSL1/PELI1/SFN/HMOX1/CEND1/SPRY1/GHRL/RERG/NOX4/RARA/PTH1R…
MORF_ACTG1	C4_computational	136	0.499453	2.14715	8.32877e-09	6.34611e-07	9195	tags=82%, list=42%, signal=47%	UBC/CLIC1/SLC25A6/TAGLN2/CFL1/ACTB/COX6A1/EIF4G2/HSP90AA1/ACTG1/RHOA/ENO1/COX8A/PFN1/PSMB1/LYPLA2/YBX1/UBB/SNRPB/GNAS/RPS16/COX4I1/RBM3/RPS17/FAU/SRP14/MAZ/B2M/RPLP2/HDGF/RPL28/TUBA1B/PTMA/ARPC2/RPS27A/JUND/COX5B/RPL23A/RPL29/RPLP1/RPL6/MYL6/SLC25A3/PGK1/RPL19/RPL14/HMGN2/HSP90AB1/RPS5/RPL4/RPL27/RPS8/RPS7/SUMO3/SUMO2/JTB/RPL8/EEF2/RPS19/RPL13A/EEF1A1/ARPC3/HNRNPC/RPS12/RPS11/RPL24/RPS9/RPL37/RPL…
GO_RESPONSE_TO_TUMOR_NECROSIS_FACTOR	C5_GO	301	0.399095	1.9147	8.3753e-09	6.36585e-07	3839	tags=30%, list=18%, signal=25%	TNF/CCL3/TNFRSF4/TNFRSF18/CXCL8/TNFSF9/CCL5/THBS1/CCL4/TNFRSF9/TNFRSF12A/HAS2/ICAM1/CD70/LTA/LTB/CCL2/GPD1/ZC3H12A/TRAF4/XCL1/GPER1/TNFSF11/NFKBIA/TNFAIP3/PTGS2/TNFRSF13C/STAT1/KLF2/GATA3/GBP1/GBP2/GCH1/CHI3L1/CCL3L3/SMPD3/PSMA8/BIRC3/ZFP36/CCL3L1/APOA1/CD27/CARD14/EDN1/TNFRSF1B/TRAF1/CLDN1/TNFRSF25/PLVAP/TMSB4X/DAB2IP/NFKB1/CCL22/CCL19/TNFSF8/EDAR/ANKRD1/ZFP36L1/TNFRSF13B/APOB/CCL25/CYBA/GGT1/AC…
GSE17721_POLYIC_VS_PAM3CSK4_1H_BMDC_DN	C7_immunologic	193	0.449348	2.04836	8.47145e-09	6.4231e-07	2096	tags=26%, list=10%, signal=24%	ADM/GPR3/COL4A5/IL10RA/USP9Y/HLA-G/ICAM1/TREM1/TRIB1/HCAR2/LRRC4/CCL2/SLFN12L/LDLR/DMP1/PDLIM1/NEDD9/SHROOM3/PIM3/ITGAX/RIPK2/VEGFA/GABRB2/CBX4/MARCKSL1/CADPS/FPR1/SPRY1/ICOSLG/CLEC4D/BIRC3/ZFP36/NLRP3/CDC42EP3/PDGFB/ETS2/CEBPB/TLR7/TNFRSF1B/SOX2/RELL1/RNF19B/PI16/MET/DNASE1L2/TMEM132A/PIM1/TIPARP/HERPUD1/RND3
DORN_ADENOVIRUS_INFECTION_48HR_DN	C2_curated	38	0.708907	2.43053	8.56397e-09	6.47734e-07	1491	tags=39%, list=7%, signal=37%	TNFRSF12A/IER3/CD83/IL6/SGK1/TRAF4/CCND1/NFKBIA/JUNB/EGR3/PLK2/MAP2K3/COL7A1/ELL2/NR4A1
GO_TERTIARY_GRANULE	C5_GO	162	0.483045	2.14694	8.63598e-09	6.51584e-07	4482	tags=37%, list=21%, signal=30%	PTX3/CXCL1/GPR84/MMP9/PLAU/CD177/SLC2A3/MCEMP1/ITGAX/SERPINB12/FCER1G/CYBB/CHIT1/TCN1/FCAR/FPR1/SIGLEC14/FPR2/CD33/CLEC4D/TRPM2/DSP/SIGLEC5/PRG3/ADGRE3/FLG2/RAP2C/TNFAIP6/PGLYRP1/HP/ITGB2/LAMTOR2/CRISP3/ITGAM/ADAM8/LGALS3/NRAS/DSC1/CYBA/ALDOA/CNN2/ORM1/RHOA/FOLR3/CD93/VAMP1/LYZ/ARL8A/CYSTM1/GGH/RAP2B/QSOX1/FTH1/NFASC/FRMPD3/LAMP1/B2M/CFP/PTPN6/CDA
GSE21774_CD62L_POS_CD56_BRIGHT_VS_CD62L_NEG_CD56_DIM_NK_CELL_DN	C7_immunologic	195	-0.473872	-2.11235	8.78297e-09	6.61058e-07	4685	tags=45%, list=22%, signal=36%	C3orf70/MAN2A2/LPIN1/NLK/RNF20/C9orf72/TBXAS1/HACE1/SIK3/RBM6/SAMD9L/HSPA12B/PRELID2/GAB1/NAP1L3/ATP8A1/TTC30A/AKAP9/CASD1/IMMP2L/PSD3/RPS6KA6/TGFBR3/TRIM68/CISD1/ZNF740/GPAM/LRRCC1/ZFPM1/PER3/TTC39B/SLC18B1/GIMAP8/ZNF354A/PTGS1/STX17/DIP2C/ITSN1/EHBP1/MINDY2/SESN3/TSC1/TMCO6/CSAD/CBFA2T2/CA2/S100PBP/FAM120C/PAN2/CHEK2/CCDC66/IFIT1B/HLF/ITGA6/TRPC6/ZNF841/RAB40B/PEAR1/GIMAP1/MED12L/PDZK1IP1/ZNF39…
GO_REGULATION_OF_ADAPTIVE_IMMUNE_RESPONSE	C5_GO	163	0.473395	2.10524	8.82797e-09	6.62828e-07	2757	tags=30%, list=13%, signal=26%	TNF/IL1RL1/HLA-G/CLCF1/IL23A/IL6/LTA/IL12RB1/CD28/ZC3H12A/FOXJ1/XCL1/BCL6/HLX/DUSP10/TNFAIP3/HAVCR2/ANXA1/TBX21/CD48/TNFRSF13C/RIPK2/GATA3/FCER1G/SUSD4/NFKBID/SLC22A13/NLRP3/CD1B/IRF1/CD160/NECTIN2/TNFRSF1B/FCER2/CD1A/CLC/CCL19/TGFB1/CD1E/SMAD7/HLA-B/IRF7/IL10/CD1C/LILRB1/IL4/C3/NLRP10/HLA-A
SCHOEN_NFKB_SIGNALING	C2_curated	32	0.761549	2.49403	8.92371e-09	6.6839e-07	1518	tags=50%, list=7%, signal=47%	PTX3/CXCL8/THBS1/TNFRSF9/MMP9/CXCL2/CCL2/GADD45B/BCL6/NFKBIA/PTGS2/CSF2/CSRNP1/BIRC3/EDN1/PTGER4
GO_REGULATION_OF_DEFENSE_RESPONSE	C5_GO	667	0.325043	1.67849	9.24338e-09	6.90657e-07	3321	tags=22%, list=15%, signal=20%	TNF/CCL3/CD96/CCL5/BCL6B/IL2RA/SH2D1A/IL1RL1/HLA-G/MMP9/IL23A/RELB/IL6/NCR3/LILRA5/FCN1/LTA/S100A9/IL12RB1/PYHIN1/SERPINE1/LDLR/CD28/ZC3H12A/CCR7/S100A12/XCL1/SOCS1/CD6/S100A8/HCK/GPER1/F12/TNFSF11/BCL6/CLEC7A/DUSP10/NFKBIA/TNFAIP3/HAVCR2/ANXA1/CNR2/CRTAM/GPR31/METRNL/APOE/PTGS2/GBP5/MUC4/STAT1/SEMA7A/RIPK2/FGR/GATA3/FCER1G/SERPINF1/SUSD4/GHRL/CASP5/FPR2/MMP26/PSMA8/CLEC4D/BIRC3/KRT1/APOA1/NLRP3/…
STK33_NOMO_UP	C6_oncogenic	278	0.409265	1.95178	9.43202e-09	7.0305e-07	2441	tags=27%, list=11%, signal=24%	PTX3/CXCL1/CXCL3/DUSP5/HCAR3/PHLDA1/CCL4/IL10RA/TPSAB1/KYNU/ICAM1/TREM1/IER3/TUBB2A/BCL3/PLAU/SDC4/SGK1/AQP9/CXCL2/PTPN3/ARL4C/EGR2/SIPA1L2/MIR22HG/RGS2/BCL6/SLC24A3/CLEC7A/KBTBD8/MAP3K8/HAVCR2/JUNB/UPP1/CLEC2B/LY6K/KCNJ2/C5AR1/EGR3/PELI1/RHOB/HMOX1/ABCA1/KLF6/C3AR1/IRS1/CSRNP1/ZFP36/THBD/PGBD5/DDIT4L/DOLK/C15orf48/TNFAIP6/MIDN/ARRDC3/ARL5B/COL6A3/CFL2/SIGLEC9/BTG2/MTSS1/MAFF/RND3/ADAMDEC1/P2RY14…
GSE41867_DAY6_VS_DAY15_LCMV_ARMSTRONG_EFFECTOR_CD8_TCELL_UP	C7_immunologic	186	0.45692	2.08056	9.4921e-09	7.05823e-07	2732	tags=33%, list=13%, signal=29%	CXCL8/TNFSF9/CXCL3/CCL5/GPR84/CCNA1/MARCKS/IL4I1/ADORA2A-AS1/UPB1/OASL/STX11/IL6/LILRA5/BCL2A1/NR4A3/BAG3/MAP3K8/DNAAF1/PTGS2/GBP5/IRAK2/TTN/GCH1/PELI1/BCL2L14/TNFAIP2/IDO2/FBLN5/FAM71E2/GPR132/IRF1/RD3/NECTIN3/BHLHE22/CEMIP/ACTA1/PTGER4/ABTB2/TNFAIP6/GEM/C4orf46/IL15RA/NRP2/IL18RAP/LATS2/NFKB1/DNASE1L2/LIFR/SNN/ZBTB43/GSG1/CALCR/ZBP1/TNC/SLC1A2/CLDN3/CEACAM5/MIR3945HG/RASGEF1B/ZBTB10/USP18
LAKE_ADULT_KIDNEY_C2_PODOCYTES	C8_cellSignature	203	-0.469067	-2.10843	9.84481e-09	7.30291e-07	3548	tags=35%, list=16%, signal=30%	TANC1/BCKDHB/ARHGAP28/PSD3/TGFBR3/HIVEP2/MSI2/PALLD/PCED1B/PLCE1/TMEM245/MACF1/KIF1B/KCNQ1OT1/PCNX4/RAI14/RASSF8/AKT3/SSBP2/ZSWIM6/CPNE8/ITGB8/IQGAP2/SBF2/BICD1/RNF150/NES/KIF13A/IGF1R/DYNC2H1/EEA1/ZNRF3/FRY/FRMD3/SPATS2L/ANKRD36/CALD1/FMNL2/APBB2/UBA6-AS1/LRRC2/PARD3B/DLG2/FTX/CTDSPL/PTPRD/EXPH5/ST6GALNAC3/PODXL/SLC7A8/ARHGEF12/THSD7A/LARGE1/PRKG1/ADAMTS9/DST/ENPEP/SGIP1/GPHN/P3H2/ALS2CL/MME/PLA…
GSE36888_UNTREATED_VS_IL2_TREATED_TCELL_6H_UP	C7_immunologic	181	0.465462	2.11573	1.00762e-08	7.45664e-07	1902	tags=26%, list=9%, signal=24%	IL2RA/ADGRA2/IER3/TRIB1/HAS1/IRF4/S100A9/ZC3H12A/DUSP4/S100A12/PLP2/SOCS1/S100A8/LINC01465/RAB31/ASPHD2/IER5/MCEMP1/METRNL/PTGS2/CDKN2D/SESN2/CYB5R2/FCER1G/VEGFA/C5AR1/LINC00877/FCGR2A/SLAMF1/FPR1/BASP1/CASP5/FPR2/SH3PXD2B/GNA15/CLEC4D/NFKB2/LILRB3/LILRA1/ADGRE3/SOCS3/TNFRSF1B/HES1/PFKFB3/DDIT4/SIPA1L1/MYO1G
REACTOME_INTERLEUKIN_4_AND_INTERLEUKIN_13_SIGNALING	C2_curated	111	0.536453	2.25972	1.01329e-08	7.48066e-07	2712	tags=43%, list=12%, signal=38%	TNF/CXCL8/LIF/ICAM1/MMP9/IL23A/COL1A2/IRF4/IL6/CEBPD/CCL2/SOCS1/TWIST1/IL2RG/TIMP1/BCL6/CCND1/ANXA1/JUNB/CDKN1A/PTGS2/STAT1/ITGAX/GATA3/VEGFA/S1PR1/HMOX1/FSCN1/SOCS3/TNFRSF1B/SOX2/FCER2/ITGB2/NANOG/CCL22/VIM/TGFB1/PIM1/OPRM1/ITGAM/PIK3R1/OSM/IL10/IL17A/IL4/HIF1A/LCN2/HSP90AA1
PASINI_SUZ12_TARGETS_DN	C2_curated	306	0.398053	1.91656	1.02784e-08	7.56999e-07	2244	tags=25%, list=10%, signal=23%	CD276/LGALS1/COL4A5/THBS1/HBEGF/CSF1/PHLDA1/MARCKS/TNFRSF12A/F3/IER3/TRIB1/FLNC/COL1A2/S100A10/LTB/ARL4C/CTXN1/FAM107B/IER5/RRAS2/CYP1B1/FILIP1L/EFNA5/ANXA1/METRNL/TUBB6/CDKN1A/PLIN2/MEG8/CRYAB/EFEMP1/RDH10/BHLHE40/GBP2/SCD/PLK2/RHOB/GPRC5A/SFN/KLF6/CDKN2B/IRS1/TSPAN2/ACTC1/BDNF/AXL/DSP/MYADM/PDGFB/NT5E/SOX4/POU3F1/ACTA1/VGLL3/HS6ST2/ANXA2/AHNAK/ID2/SHB/ABTB2/GLIPR2/TMEM47/CLIC1/MEG3/CMTM3/CFL2/V…
MODULE_223	C4_computational	140	0.492464	2.12811	1.04039e-08	7.64417e-07	3556	tags=41%, list=16%, signal=35%	TNFSF9/CXCL1/LIF/CXCL10/HBEGF/EPS8/CSF1/PDGFA/TPSAB1/HLA-G/CD83/IL6/CD69/IL2RG/TIMP1/BCL6/CD48/LY86/CD5/SERPINF1/CD79A/FOSL1/SLAMF1/AREG/SFN/EMP3/KLF6/LY6E/RNASE6/LILRB3/LILRA1/PDGFB/RUNX3/EDN1/IL3/IGF1/HP/IL15RA/NAB2/LILRB4/S100B/GCG/HLA-B/FGG/OSM/ISG20/CSF3/CSRP2/CD8A/HLA-A/GRPR/IRAK1/EMP1/MXD1/NAMPT/CRIP1/LILRA2/IGF2
GO_POSITIVE_REGULATION_OF_LEUKOCYTE_MIGRATION	C5_GO	140	0.492339	2.12757	1.05399e-08	7.7257e-07	3121	tags=33%, list=14%, signal=28%	TNF/CCL3/TNFRSF18/CXCL8/CCL5/CXCL10/THBS1/CSF1/CCL4/ICAM1/IL23A/IL6/SERPINE1/CCR7/XCL1/IL34/EDN3/VEGFA/C5AR1/CCR1/CD99/DYSF/FPR2/C3AR1/CSF1R/PGF/EDN1/XG/PLVAP/PRSS56/CCL19/CALR/AKIRIN1/PLA2G7/ADAM8/LGALS3/KITLG/C1QBP/IL4/DAPK2/RHOA/RARRES2/WNT5A/CAMK1D/CXCL17/LGALS9
LAKE_ADULT_KIDNEY_C15_CONNECTING_TUBULE	C8_cellSignature	168	-0.488489	-2.13748	1.07618e-08	7.86962e-07	1823	tags=21%, list=8%, signal=20%	PPFIBP1/FGF13/KAZN/TMTC2/APBB2/NAALADL2/ANK3/RAD51B/PTH2R/RASAL2/ARL15/JPX/EXOC6B/DPY19L2/ARHGAP6/PRKG1/MID1/SPIRE1/PPP1R9A/ADAMTS9/ZNF704/GPHN/MPPED2/KANSL1L/RORA/PCDH9/GRIP1/BICC1/GPC5/LGR4/NR3C2/ITGA2/LIMCH1/BMPR1B/EPB41L3/XIST
MODULE_151	C4_computational	305	0.40161	1.92934	1.11227e-08	8.11433e-07	9222	tags=67%, list=42%, signal=39%	RPS4Y1/DDX3Y/TPSAB1/GADD45G/PLP2/IL2RG/CLEC2B/KRT24/MRPS24/CST7/RHOG/MB/CLIC1/TPI1/SNRPC/MNDA/LGALS3/ZFP36L1/CYBA/CD63/SLC25A5/FABP5/HLA-A/TIPIN/PFN1/PSMB1/P4HB/HSBP1/LYZ/PSMA2/PRELID1/SEC61B/SNRPB/AIF1/UQCRFS1/RPS16/SF3B5/UCP2/FKBP2/YWHAG/GPX4/HIGD2A/RPS2/VDAC1/PPIB/PKM/C19orf53/GPX1/CAPNS1/B2M/STRAP/RPL28/NDUFS5/PCNA/SNRPD2/PTMA/ARPC2/RPS27A/SEC11A/PRDX4/ETFB/PSMD8/STMN1/CSNK2B/COX5B/RPL23A/RPL…
MORF_ANP32B	C4_computational	188	0.45212	2.06102	1.12023e-08	8.15314e-07	9855	tags=74%, list=45%, signal=41%	PCLAF/CLIC1/PPP1CA/COX6A1/EIF4G2/HSP90AA1/PSMB1/EIF3C/HMGB2/YBX1/NUDT1/TUFM/SNRPB/BCL7B/GNAS/UQCRFS1/DDOST/COX4I1/YWHAQ/FAU/SRP14/RPLP2/HDGF/HDAC1/PCNA/SNRPD2/RPS27A/PSMD8/CSNK2B/SUMO1/COX5B/LYPLA1/SET/HNRNPAB/CYC1/COPE/RPL6/EIF4H/PPM1G/PSMC1/ELOC/KHDRBS1/SLC25A3/RPL14/HSP90AB1/SNRPA/PHB2/ANP32B/EIF3K/PUF60/SNRPE/RPL36AL/URM1/PSMB7/DDX49/RALY/SUMO3/ACP1/CCT7/SUMO2/JTB/XRCC6/NDUFA1/EEF2/PARK7/SRSF…
MODULE_88	C4_computational	816	0.310052	1.62683	1.12924e-08	8.19934e-07	3563	tags=26%, list=16%, signal=23%	ADM/CP/TMSB4Y/PRF1/STX1A/GPR3/LIF/GSTM1/HBEGF/PHLDA1/PHLDA2/TCF7/IL1RN/MYRF/G0S2/SPP1/FBN2/IER3/TRIB1/SERPINA1/COL6A2/NGFR/COL1A2/AGR2/PLAU/SSTR2/S100A9/FBLN2/WNT10B/CYP2F1/HSPA2/AQP9/CCL2/GFPT2/SERPINE1/GADD45G/LDLR/MPO/HPGD/PRG2/PEG10/LRRC32/DLK1/CD6/S100A8/IL2RG/ISG15/F12/SLC2A3/RAB31/RND1/COL6A1/HAP1/CCND1/ERBB3/APOE/JUNB/CDKN1A/PLIN2/GC/CRYAB/RCVRN/GLYAT/FEV/ALAS2/FXYD2/FCER1G/VEGFA/RAMP1/GC…
GSE18791_CTRL_VS_NEWCASTLE_VIRUS_DC_2H_UP	C7_immunologic	180	-0.485216	-2.13594	1.15002e-08	8.33065e-07	4718	tags=47%, list=22%, signal=37%	TNRC6A/ZNF850/OXSM/KRBOX4/PEX1/PLXNB1/TNRC18/ZNF576/CCDC13/PDCD2L/GIMAP6/ZNF260/TTI1/UMPS/GIMAP2/TRIM27/INTS8/FOS/MAPK14/RPE/HEATR6/MRPS31/FANCF/ZNF45/ASF1A/NIFK-AS1/KBTBD7/PUS7L/WDR92/C2orf42/TLR1/GOLGA1/AGGF1/RPP40/DZIP3/URB1/EFCAB7/ZNF544/GEMIN5/FBXL4/NUP37/CMTR2/SEC22A/C17orf80/CD3EAP/POP1/TIMM21/ZFP62/CCDC66/RSPH4A/UTP14C/PAAF1/ERMARD/PNPLA4/MLH3/DCP1B/CCDC51/POLI/TLR6/PSRC1/ORC5/CNFN/ZNF559…
GSE40274_CTRL_VS_GATA1_TRANSDUCED_ACTIVATED_CD4_TCELL_DN	C7_immunologic	164	0.4717	2.10406	1.17639e-08	8.5017e-07	5409	tags=43%, list=25%, signal=33%	EGR4/PHLDA1/IER3/TRIB1/IL21R/RELB/CXCL2/ZC3H12A/PEG10/BHLHE41/RTN4RL2/SESN2/VEGFA/TRIB2/GCH1/CBX4/KLF6/CDKN2B/FIGN/SLC16A6/CAMK2N1/EZR/RASAL1/ELL2/S1PR2/NFKBIB/PTP4A1/CFAP74/SCGB2A2/PLK3/ARRDC3/PLK4/STAP1/UBE2S/MEX3C/SDE2/BCL2L11/IRF2BP2/ATF4/SLC18A3/ITK/CAMK2N2/C15orf39/CD93/ART5/MXD1/ADORA2A/TOX3/ARID5A/NMT2/TNFRSF10B/UQCRFS1/EIF4A3/NXF2/CCSAP/BTG1/SIAH2/BACH1/PHF19/TAF13/TMPRSS3/EIF6/CYLC1/IL3…
GSE46606_IRF4MID_VS_WT_CD40L_IL2_IL5_DAY1_STIMULATED_BCELL_DN	C7_immunologic	196	0.449081	2.05691	1.1839e-08	8.53598e-07	3280	tags=30%, list=15%, signal=26%	TNF/TNFSF9/CCL4/ICAM1/F3/RAB20/CEBPD/HCAR2/CD69/MIR22HG/NFKBIA/TNFAIP3/NFKBIE/SH2D2A/SHROOM3/IRAK2/GALR2/GCH1/MARCKSL1/RAB11FIP1/CH25H/TNFAIP2/ICOSLG/NFKB2/TTYH1/BIRC3/NLRP3/ETS2/ZDHHC22/B3GAT1/NFKBIB/PROB1/OPRK1/SOCS3/ABTB2/RNF19B/HTR7/REL/HMGCS2/HIVEP1/NFKB1/AGXT/MAFF/OSGIN2/MEX3C/PDE4B/MAPKAPK2/ZNF799/CSF3/TLR2/VASP/RASGEF1B/HMGB2/CPEB4/CCDC71L/GABRA5/ACCSL/RAB32/SAMSN1
GSE360_L_MAJOR_VS_B_MALAYI_HIGH_DOSE_MAC_UP	C7_immunologic	194	0.449622	2.05174	1.19663e-08	8.60765e-07	2035	tags=25%, list=9%, signal=23%	TNFRSF4/CXCL8/MSC/CXCL1/CXCL3/DUSP5/ARC/DDX3Y/IL1RN/G0S2/KYNU/SPAG6/S100A10/AQP9/CCR7/DUSP4/GALNT18/MT2A/MIR22HG/CD6/HLX/MYL4/NFKBIA/MAP3K8/PLAUR/TNFAIP3/CYP1B1/ANXA1/ACTG2/SOX15/FCAR/MARCKSL1/IRS1/NQO1/RPGRIP1/INSL3/PTP4A1/MT1H/DHH/MT1G/GNAT1/AFM/TRAF1/TNFAIP6/NRP2/NFKB1/PLA2G7/FAM155A
GSE2405_S_AUREUS_VS_A_PHAGOCYTOPHILUM_NEUTROPHIL_DN	C7_immunologic	196	-0.465246	-2.07592	1.2516e-08	8.98214e-07	6580	tags=58%, list=30%, signal=41%	B4GALNT1/KATNAL1/SBSN/ZMAT3/PADI3/SUGP2/NLRX1/MPZL3/HIF1AN/DPY19L3/ZER1/CUL4A/RINL/PHACTR4/ZFYVE26/HELZ/PIGO/AP1G2/H6PD/SEC22C/GGA3/RPAP1/IL17RB/TCHP/TAF1C/WASHC1/INPP5E/PML/KLC4/ZNF346/FBXL20/APBB3/ASB13/TESK2/POLRMT/XKRX/KRBA1/LENG1/TARS2/RINT1/RBAK/CCDC93/GON4L/RAB5B/ANAPC7/PICK1/RANBP10/TBL2/BCAS3/CIT/ZZEF1/UNG/INVS/SRBD1/FAM160B2/SNX33/NRDE2/CPTP/CYB5R1/WRN/SLC39A14/DHX57/RNF214/KIAA0319L/AL…
GO_CYCLIC_NUCLEOTIDE_MEDIATED_SIGNALING	C5_GO	218	0.433989	2.02039	1.26358e-08	9.02779e-07	3530	tags=35%, list=16%, signal=29%	ADM/PDE3B/GPR3/NPPC/CXCL10/THBS1/PDE9A/PDE4A/ADRA2B/ADGRG5/GHRHR/S1PR3/PTHLH/GPER1/RGS2/RASD2/CNR2/ADRB1/APOE/PDE10A/CXCL11/ADGRF1/RNF157/GPR65/GALR2/GAL/PRKCA/RAMP1/ADGRE5/S1PR1/PDE7B/ABCA1/CXCL9/DRD5/PTH1R/GPHA2/GUCY2F/GPR61/S1PR2/ADGRE3/ADM2/ADCYAP1/PTGER4/FFAR4/AHR/CALCB/GPR6/ARRDC3/HTR5A/PDE4D/SOX9/ADGRG4/GCG/RAMP2/OPRM1/GPR101/GPR78/GNAI1/UCN2/CALCR/PDE11A/DRD1/RIMS2/DRD3/CRH/OR51E2/CHGA/UC…
GO_POSITIVE_REGULATION_OF_CHEMOTAXIS	C5_GO	142	0.493229	2.14356	1.26381e-08	9.02779e-07	3121	tags=35%, list=14%, signal=30%	CCL3/CXCL8/CCL5/CXCL10/THBS1/CSF1/CCL4/F3/IL23A/IL6/SERPINE1/CCR7/XCL1/IL34/CCR4/EDN3/VEGFA/C5AR1/CCR1/AZU1/S1PR1/DYSF/FPR2/C3AR1/CSF1R/PGF/PDGFB/EDN1/FGFR1/DSCAM/TMSB4X/MET/PRSS56/CCL19/CALR/TGFB1/AKIRIN1/PLA2G7/SLIT2/NTF3/C1QBP/IL4/DAPK2/TUBB2B/RARRES2/WNT5A/CAMK1D/CXCL17/FGF2/LGALS9
GO_EMBRYONIC_ORGAN_DEVELOPMENT	C5_GO	447	0.354446	1.77148	1.34857e-08	9.61097e-07	4680	tags=34%, list=22%, signal=27%	ROR2/TNF/ADM/CXCL8/LIF/PHLDA2/PDGFA/TCF7/NTN1/SNAI1/FOXC1/FBN2/MDFI/DLX2/WNT1/HOXA1/PAX8/PBX4/TEAD3/PLCD3/OSR2/NR4A3/TWIST1/HLX/STRA6/RNF207/DNAAF1/TBX21/LEF1/JUNB/WNT9A/SHH/CSF2/EFEMP1/MAFB/SOX15/WNT11/SPRY2/GATA3/OTX1/RDH10/VEGFA/SLC44A4/HOXB9/SIX3/PRDM1/APELA/TBX15/RARA/LHX1/PDGFB/SIX1/CC2D2A/COL13A1/EDN1/SH2B3/CEBPB/SOCS3/CCDC103/HES1/IL3/ID2/FGFR1/HOXD4/PLK4/EGFR/FLT3LG/ZIC1/RSPO3/TEAD1/CHRN…
GO_SPECIFIC_GRANULE	C5_GO	159	0.469052	2.08723	1.35336e-08	9.62288e-07	2898	tags=29%, list=13%, signal=25%	PTX3/CXCL1/GPR84/RETN/PLAU/CD177/SLC2A3/PLAUR/MCEMP1/CYBB/CHI3L1/CHIT1/TCN1/FCAR/BPI/MS4A3/FPR2/C3AR1/CD33/NEU1/CLEC4D/TRPM2/PRG3/TNFRSF1B/MMP25/SLC27A2/PGLYRP1/HP/ITGB2/NFKB1/LAMTOR2/CRISP3/AOC1/ITGAM/ADAM8/CYBA/PGRMC1/ORM2/CNN2/CKAP4/LCN2/CEACAM3/ORM1/CMTM6/FOLR3/CD93
SMID_BREAST_CANCER_BASAL_UP	C2_curated	639	0.325163	1.67412	1.37738e-08	9.77118e-07	3266	tags=26%, list=15%, signal=23%	ADM/PTX3/CP/CXCL8/CXCL1/PTPN14/CCL5/CXCL10/HBEGF/HLA-G/TNNI2/ICAM1/TREM1/FOXC1/SPP1/TUBB2A/S100A10/MDFI/PDE9A/S100A9/HS3ST1/AQP9/CCL2/IGF2BP3/CNN3/SDC2/ARL4C/PRG2/BCL2A1/PEG10/S100A8/APOBEC3A/SLC2A3/RGS2/CLEC7A/CHAC1/SERPINB2/RRAS2/DCX/ACTG2/TMEM158/UPP1/PLIN2/PTGS2/CXCL11/PRAME/CRYAB/GALNT14/CYB5R2/SOX15/GAL/KCNK5/GBP1/PRKCA/VEGFA/FOSL1/CHI3L1/PELI1/CACNA1A/OCA2/UGT8/SIX3/SFN/EXTL1/KLF6/CDC42EP1…
GO_REGULATION_OF_PROTEIN_KINASE_ACTIVITY	C5_GO	771	0.309404	1.61328	1.39193e-08	9.85172e-07	2380	tags=18%, list=11%, signal=16%	ROR2/TNF/DUSP8/CCL5/CXCL10/DUSP5/THBS1/HBEGF/SPRY4/CSF1/PDGFA/DUSP2/CCNA1/TESC/TRIB1/LAX1/IL23A/SH3BP5/LILRA5/FZD8/SDC4/PROK2/GADD45G/CCR7/DUSP4/S100A12/ADRA2B/TRAF4/CHRNA3/SOCS1/NEDD9/NTRK1/GADD45B/TENM1/RGS2/TNFSF11/EPHA4/CCND1/DUSP10/MAP3K8/ERBB3/TNFAIP3/EFNA5/IL34/APOE/CDKN1A/CDKN2D/IRAK2/SESN2/TTN/SERTAD1/RIPK2/FGR/WNT11/SPRY2/EDN3/VEGFA/TRIB2/PTPRH/C5AR1/CHI3L1/AZU1/AREG/GPRC5A/PAK6/SFN/CAM…
FAN_EMBRYONIC_CTX_BIG_GROUPS_MICROGLIA	C8_cellSignature	359	0.375906	1.83946	1.44157e-08	1.01797e-06	3779	tags=30%, list=17%, signal=26%	CCL3/IRF8/CCL4/IL10RA/SPP1/IER3/SERPINA1/CD83/GPR183/OLFML3/CEBPD/HCST/ACY3/NINJ1/BHLHE41/HCK/GADD45B/RGS2/C12orf75/TYROBP/CCND1/NFKBIA/HAVCR2/LY86/APOE/JUNB/LPAR5/KLF2/ITGAX/MILR1/HPGDS/FCER1G/SAT1/CYBB/SERPINF1/APOC1/FCGR2A/CCR1/CRYBB1/CD68/RHOB/IFI30/HMOX1/FPR1/IER2/CORO1A/RNASE6/CH25H/C3AR1/CSF1R/CYTH4/ZFP36/DHRS3/PDGFB/FCGR3A/LST1/RHOG/COTL1/MPEG1/TLR7/TNFRSF1B/B3GNT5/IGF1/FCGR1A/VMP1/ITGB2/…
KEGG_NATURAL_KILLER_CELL_MEDIATED_CYTOTOXICITY	C2_curated	131	0.499866	2.14618	1.48565e-08	1.04497e-06	2909	tags=28%, list=13%, signal=25%	TNF/PRF1/NFATC4/SH2D1A/HLA-G/ICAM1/NCR3/HCST/ZAP70/TYROBP/LCK/CD48/CSF2/ULBP2/FCER1G/PRKCA/KIR3DL2/TNFRSF10C/ULBP1/PIK3R2/TNFRSF10D/FCGR3A/IFNA7/ITGB2/SHC2/SHC3/GZMB/NRAS/HLA-B/IFNA10/KIR2DL4/PIK3R1/IFNA5/SH2D1B/HLA-A/FAS/LAT
PSMB5_TARGET_GENES	C3_motif	229	0.420507	1.96293	1.48658e-08	1.04497e-06	5688	tags=43%, list=26%, signal=32%	ADM/LGALS1/THBS1/PHLDA2/PMAIP1/IER3/SDC4/SGK1/SNHG9/ATF3/SERPINE1/LINC01136/TWIST1/GDNF-AS1/SLC2A3/IER5/JUNB/KLF2/LMNA/VEGFA/PLK2/RHOB/IER5L/ZFP36/GADD45A/UBC/FSCN1/AHNAK/ID2/ARL4D/SLC3A2/TMSB4X/TPI1/DDIT4/CALR/BTG2/FAM53C/UBE2S/RND3/CFL1/MT1E/ACTB/TMSB10/ATF4/GTF2B/ALDOA/HSP90AA1/MKNK2/HSPA1B/ACTG1/GAPDH/PPP1R15B/PPP1R14B/TSPAN4/TUBB3/NABP1/CDC25C/EMP1/POLR2L/VAMP1/UBB/SNHG19/CALM1/TUBB4B/RRM2/E…
GNF2_PECAM1	C4_computational	54	0.642104	2.37029	1.56216e-08	1.09561e-06	3535	tags=50%, list=16%, signal=42%	CEBPD/FCN1/HCK/RGS2/TYROBP/MAFB/FCER1G/CYBB/CCR1/TNFAIP2/LILRB3/ZFP36/LILRA6/LILRA1/CEBPB/LST1/TNFRSF1B/NCF2/SH3BGRL3/ITGB2/TLR2/CMTM6/CD93/TYMP/NOD2/AIF1/LILRA2
REACTOME_CHEMOKINE_RECEPTORS_BIND_CHEMOKINES	C2_curated	58	0.630738	2.343	1.57766e-08	1.10397e-06	2367	tags=40%, list=11%, signal=35%	CCL3/CXCL8/CXCL1/CXCL3/CCL5/CXCL10/CCL4/CXCR3/CXCL2/CCL2/CCR7/XCL1/CCR4/CXCL11/CCR1/CXCL9/CCL3L3/CCL3L1/CCR9/CCL22/CCL19/CCR8/CCL25
GSE22140_GERMFREE_VS_SPF_MOUSE_CD4_TCELL_DN	C7_immunologic	200	0.441574	2.02796	1.59906e-08	1.11389e-06	2823	tags=28%, list=13%, signal=24%	CCL3/ADM/PTX3/MSC/CXCL3/THBS1/CCL4/DUSP2/IER3/OASL/TUBB2A/SH3BP5/HS3ST1/SERPINE1/PLP2/MIR22HG/TIMP1/SERPINB2/PLIN2/PPIF/LMNA/SGSH/CD99/EMP3/GNA15/CSF1R/NQO1/ELL2/NOVA1/FERMT2/IFIT3/ANXA2/TNFRSF1B/AHNAK/IFITM2/TRAF1/CLIC1/SLC3A2/HMGA1/IFIT2/NFKB1/DDIT4/ALOX5AP/RGS1/TNFSF8/LGALS3/PPP1CA/MAPKAPK2/PIK3R1/FARP1/CD300C/VASP/FABP5/SERTAD2/YWHAH
GO_NUCLEOSIDE_TRIPHOSPHATASE_REGULATOR_ACTIVITY	C5_GO	334	-0.397573	-1.88237	1.60131e-08	1.11389e-06	4853	tags=33%, list=22%, signal=26%	NPRL3/DOCK5/SIPA1L3/EVI5L/RACGAP1/RAP1GAP/RALGAPA2/DEPDC1/PLXNB1/NPRL2/ARHGAP20/AGAP6/STARD8/RUNDC3A/ARHGAP39/RABEP1/ARHGEF19/SRGAP1/RGS6/RGPD5/RGPD4/OCRL/ARAP1/RGPD3/AGAP2/ARHGAP5/RASA4/PREB/RALGAPA1/RAPGEF2/TBC1D16/AGAP4/ARHGAP28/RGS11/LLGL2/SGSM3/MYO9A/ARHGAP25/AGAP5/RIN2/RALGAPB/DNAJB6/OPHN1/RAP1GAP2/FLCN/RGS17/TBC1D2B/RAB3GAP2/TBC1D17/EVI5/PCP2/RGS14/RGS3/IQGAP2/TBC1D24/ARHGAP22/GRTP1/TSC1/A…
AIZARANI_LIVER_C1_NK_NKT_CELLS_1	C8_cellSignature	150	0.485216	2.12833	1.60267e-08	1.11389e-06	3871	tags=35%, list=18%, signal=29%	CD96/PRF1/CD7/CCL5/DUSP2/SH2D1A/IL2RB/NKG7/HCST/PYHIN1/ARL4C/SYTL3/CD3E/IFITM1/IL2RG/TBX21/LCK/CD48/SH2D2A/ADGRE5/CD3D/RBM38/PRDM1/CORO1A/KLRG1/TRBC2/PARP8/RUNX3/CST7/TIGIT/TNFRSF1B/SH3BGRL3/ITGB2/TMSB4X/ALOX5AP/RGS1/GZMB/HLA-B/PIK3R1/ISG20/CD8A/HLA-A/CTSW/CYTIP/IPCEF1/SLC38A1/LCP1/GZMM/PPP1R18/TRAC/FLNA/SLAMF6/PTP4A2
MODULE_456	C4_computational	109	0.528956	2.21974	1.61949e-08	1.12305e-06	2689	tags=35%, list=12%, signal=31%	TNF/GSTM1/DUSP5/STX11/CD83/IL6/NR4A3/SLC2A3/BCL6/NFKBIA/TNFAIP3/LCK/SH2D2A/CDKN1A/GPR65/TRIB2/SLAMF1/NOX4/BASP1/CHI3L2/NFKB2/KLHL15/PTGER4/TRAF1/TNFRSF25/PAG1/MSX1/MICAL2/NRAS/CYP2E1/TOX/DENND3/CD1C/RGL3/CD8A/HSPA5/MAPK10/HIF1A
GSE2405_0H_VS_12H_A_PHAGOCYTOPHILUM_STIM_NEUTROPHIL_UP	C7_immunologic	193	0.444792	2.0276	1.67497e-08	1.15892e-06	2933	tags=30%, list=13%, signal=26%	TNFRSF4/PRF1/CD7/TESC/OASL/RELB/IL2RB/IRF4/NKG7/GADD45G/CCR7/EGR2/PACSIN1/XCL1/TNFSF11/IER5/CRTAM/CD48/STAT1/KLF2/GPR65/IGFLR1/TOX2/TRIB2/TRPM1/S1PR1/DAPL1/ACTN2/CYTH4/RUNX3/CST7/IFIT3/COTL1/TNFRSF1B/ID2/NR4A1/GLIPR2/TAP1/ITGB2/FLT3LG/LACTB/NFKB1/NAB2/RGS1/PPP1R13B/SMAD7/ENC1/HLA-B/IRF7/CCR8/CMPK2/CD82/CNN2/ATAD3A/CTSW/STK24/ITGAE
GO_INTERFERON_GAMMA_PRODUCTION	C5_GO	113	0.5249	2.22403	1.6813e-08	1.1607e-06	2757	tags=34%, list=13%, signal=30%	TNF/CD276/IRF8/CD96/INHBA/IL1RL1/BCL3/IL23A/LTA/IL12RB1/ZC3H12A/CCR7/CD3E/XCL1/ISG15/CLEC7A/HAVCR2/CRTAM/IL36RN/RIPK2/GATA3/RARA/SLC7A5/AXL/EBI3/TLR7/TLR9/PGLYRP1/IL18RAP/PDE4D/DDIT3/PDE4B/IL10/IL12RB2/C1QBP/LILRB1/ITK/HLA-A
GSE34205_HEALTHY_VS_RSV_INF_INFANT_PBMC_DN	C7_immunologic	191	0.443784	2.02346	1.70266e-08	1.17282e-06	3613	tags=34%, list=17%, signal=29%	ADM/LGALS1/GPR84/IL1RN/RETN/TRIB1/MMP9/S100A9/CD177/LDLR/MPO/S100A12/S100A8/GPER1/BCL6/HLX/MYL4/SLC6A8/PRTN3/MCEMP1/S100P/ALAS2/SAT1/EXTL1/DYSF/BPI/GNA15/KRT1/MYADM/E2F1/NECTIN2/CCNE1/PCLAF/KLHL15/PGLYRP1/MAP1LC3B/HP/UBALD2/CDCA7/FAM53C/UHRF1/CENPN/CENPU/NRAS/SLC22A4/TYMS/GSG1/EIF1B/NME1/LCN2/ORM1/RIOK3/RNASE2/NKX3-2/TUBB3/GLRX5/ARL8A/TMOD1/CYSTM1/EXOSC9/MCM4/FOXM1/CDC45/UQCRFS1/FCGR1B
GSE37416_0H_VS_6H_F_TULARENSIS_LVS_NEUTROPHIL_DN	C7_immunologic	195	0.453079	2.07509	1.7431e-08	1.19534e-06	4205	tags=31%, list=19%, signal=25%	TNF/ADM/GPR84/DUSP2/IL10RA/ICAM1/IER3/CD83/GADD45G/BCL2A1/NEDD9/KCNH2/NINJ1/SLC2A3/IER5/NFKBIA/PLAUR/NFKBIE/CDKN1A/GPR65/BHLHE40/MAP2K3/GNA15/ELL2/RUNX3/SLC35B2/B3GNT5/TNFAIP6/SLC3A2/HMGA1/LATS2/NFKB1/ERMN/SIPA1L1/TIPARP/MAFF/SNN/PDE4B/MAPKAPK2/CHMP4B/GGT1/MAPK6/IDH2/PDK1/GAPDH/ENO1/EAF1/PPP1R14B/SAMSN1/CYB5D1/FBXO34/CXCL16/RAB5A/FKBP2/CYLD/PTP4A2/SLC43A3/PKM/ZNF267/SPHK1/TFRC
GSE7852_LN_VS_FAT_TCONV_DN	C7_immunologic	195	0.453111	2.07523	1.7431e-08	1.19534e-06	3771	tags=33%, list=17%, signal=27%	TNFRSF18/LGALS1/CXCL3/DUSP5/CXCR3/GAS7/IL1RL1/IER3/MMP9/NKG7/HCST/ATF3/BCL2A1/PLP2/SLC2A3/RGS2/BAG3/TBX21/METRNL/CDKN1A/EFEMP1/ALAS2/KCNK5/BHLHE40/PRDM1/SLC16A6/KLRG1/CAMK2N1/CDC42EP3/MYADM/RAI2/RUNX3/IQGAP1/AXIN2/ANXA2/CFD/NR4A1/DCN/IFITM2/RNF19B/EPSTI1/NFIL3/ORC1/S100A11/TAGLN2/GZMB/COL3A1/FARP1/IL10/ATF4/HSPA5/ODC1/TXN/HMGB2/MECOM/MYO1F/SAMSN1/PHF13/TAX1BP3/IGF2/P2RY10/AHCY/ZNF622/ESM1
HAY_BONE_MARROW_NK_CELLS	C8_cellSignature	356	0.381119	1.86005	1.75235e-08	1.19902e-06	2368	tags=20%, list=11%, signal=18%	CCL3/TNFRSF18/PRF1/PLEKHG3/CD7/KIR3DX1/B3GNT7/CCL4/FEZ1/ITGB7/IL2RB/NCR3/NKG7/HCST/IL12RB1/PYHIN1/ARL4C/SYTL3/ADGRG5/DOK2/XCL1/IFITM1/ZAP70/IL2RG/HAVCR2/TBX21/SH2D2A/AK5/GPR65/LDB2/FSD1/RAMP1/KIR3DL2/ADGRE5/RBM38/IER2/CORO1A/TSPAN2/NCALD/PDE6G/DHRS3/PTGDR/BNC2/RUNX3/CST7/IRF1/CD160/EFHD2/RGS9/TRDC/ID2/CHST2/IFITM2/APOBEC3H/CLIC1/TAP1/ITGB2/LINC02084/SIDT1-AS1/IL18RAP/FHL3/DDIT4/MAFF/ADAM8/CFL1/CD…
GO_NEGATIVE_REGULATION_OF_CELL_ACTIVATION	C5_GO	196	0.445609	2.04101	1.77431e-08	1.21136e-06	2648	tags=30%, list=12%, signal=27%	INHBA/PDGFA/IL2RA/HLA-G/LAX1/SDC4/LDLR/ZC3H12A/FOXJ1/XCL1/SOCS1/LRRC32/GPER1/BCL6/HLX/TYROBP/TNFAIP3/HAVCR2/ANXA1/CNR2/TBX21/CRTAM/APOE/SHH/MILR1/FGR/GAL/PELI1/CYGB/HMOX1/BPI/NFKBID/NRARP/AXL/PLA2G2F/THBD/PDGFB/RUNX3/CST7/IRF1/SH2B3/CEBPB/LST1/TIGIT/ID2/PGLYRP1/VTCN1/PAG1/SMAD7/MNDA/LGALS3/PRKCD/TNFRSF13B/FGG/IL10/LRFN5/LILRB1/IL4/FOXF1
GSE13738_RESTING_VS_TCR_ACTIVATED_CD4_TCELL_UP	C7_immunologic	184	-0.471593	-2.08742	1.78625e-08	1.21682e-06	4919	tags=43%, list=23%, signal=33%	FAM171A1/KIDINS220/ELK4/PHC3/SCML1/ABCD4/ZBED5/ZNF611/TNKS/SETD6/PRKD3/GIMAP2/HAUS3/ANXA2R/TAF4/ASTE1/ZFP28/EBAG9/N4BP2L2/SLC33A1/ATF7IP/FAM161B/TBL1X/HCG27/GPC2/SORL1/FAM13A-AS1/EZH1/PCF11/GTF2H1/SYNJ2BP/TNRC6B/SLC18B1/MATN1-AS1/MINDY1/HBB/UNKL/PATJ/LRRC8D/TMEM63A/TSC1/ARHGEF15/KIAA0825/ZNF550/IGF1R/ZNF793/ENGASE/WDR19/TCEANC/STK38/ITGA6/ZBTB20/ADAM33/ZNF582-AS1/BTN3A3/TSPAN9/ZNF763/C9orf64/FAM1…
LAKE_ADULT_KIDNEY_C4_PROXIMAL_TUBULE_EPITHELIAL_CELLS_S2	C8_cellSignature	168	-0.484745	-2.1211	1.8697e-08	1.27086e-06	3369	tags=37%, list=16%, signal=31%	PTPRG/SAMD4A/TTC28/NRG3/SUMF1/PDE8A/DANT2/VPS13A/ANKRD26/DIP2C/MAST4/ITSN1/ITGB8/COL4A2/PATJ/SBF2/MACC1/IGF1R/CLSTN2/TPM1/SLC2A9/TMEM178B/PPFIBP1/SPATS2L/CALD1/ZBTB38/ACSM3/FMNL2/ZBTB20/KIAA1217/ANK3/NHS/PARD3B/PTH2R/RASAL2/DLG2/FTX/PTPRD/LRP2/AKAP12/ARHGAP6/COL4A1/PPP1R9A/NRP1/WWC1/P3H2/KANSL1L/STOX2/L3MBTL4/RORA/PRUNE2/NFIA/NBEA/CDK14/BICC1/KANK1/SDK1/PLXDC2/WDFY3/NLGN1/PARD3/NFIB
HAY_BONE_MARROW_MONOCYTE	C8_cellSignature	216	0.425159	1.98192	1.88326e-08	1.27727e-06	3695	tags=33%, list=17%, signal=28%	ZNF703/HOTAIRM1/SERPINA1/CLCF1/LILRA5/LFNG/GPBAR1/HCK/ISG15/TIMP1/HES4/ITGAX/FGR/FCER1G/SAT1/GBP2/GCH1/C5AR1/CHST7/ZMYND15/LINC00877/CD68/ZG16B/CAMK1/LY6E/RARA/SMIM25/CASP5/C3AR1/MSR1/CSF1R/LILRA1/SLC2A6/FCGR3A/LST1/RHOG/COTL1/TNFRSF1B/NR4A1/ST3GAL5/TPPP3/PAPSS2/MEG3/ABI3/TMSB4X/SLC31A2/MYO1G/SLC25A6/FIBCD1/MTSS1/S100A11/PTP4A3/GNG5/LINC02185/CD300C/LILRB1/VASP/CEACAM3/CMTM6/CDKN1C/LYNX1/CYTIP/SL…
ICHIBA_GRAFT_VERSUS_HOST_DISEASE_35D_UP	C2_curated	142	0.489465	2.12721	1.89501e-08	1.28241e-06	3497	tags=37%, list=16%, signal=32%	CD7/CCL5/S100A9/CXCL2/CCL2/SLFN12L/BCL2A1/S100A8/HCK/TYROBP/PRTN3/LCK/STAT1/GBP2/CYBB/CCR1/SCD/CD68/FPR1/CXCL9/MSR1/CSF1R/RND2/IQGAP1/MPEG1/CCL4L2/FCGR1A/CLIC1/TAP1/ITGB2/IRGM/TMSB4X/LILRB4/BTG2/S100A11/MNDA/LGALS3/PLK1/SAMHD1/TMSB10/CYBA/ORM2/ORM1/RNASE2/CD52/GPX3/TSPAN4/CYTIP/NABP1/LYZ/NAMPT/MCM4/AIF1
LAKE_ADULT_KIDNEY_C22_ENDOTHELIAL_CELLS_GLOMERULAR_CAPILLARIES	C8_cellSignature	137	-0.517064	-2.19393	1.96156e-08	1.32455e-06	4886	tags=48%, list=22%, signal=38%	SORBS2/EBF1/UTRN/ARHGEF3/BCAS3/PRKCE/SHANK3/MAML3/LDLRAD4/ANKS1A/PTPRM/FCHSD2/PAN3/TMTC1/FOS/SLCO2A1/PIK3C2A/NTN4/RFX3/KALRN/PTPRG/HECW2/TTC28/NRG3/MACF1/PDE8A/AKT3/DPYD/HIBCH/ZSWIM6/COL4A2/SBF2/PLAT/TCF4/NKTR/ADGRF5/PPFIBP1/CALD1/FMNL2/SYNE1/KIAA1217/APBB2/RASAL2/ARL15/NOSTRIN/ST6GAL1/PLPP3/EXOC6B/AKAP12/GRB10/ST6GALNAC3/COL4A1/ARHGEF12/PRKG1/PREX2/NFIA/EMCN/UACA/PLXDC2/GPC5/CHRM3/TEK/SNED1/PBX1…
WP_CILIOPATHIES	C2_curated	177	-0.48145	-2.11828	1.96746e-08	1.32563e-06	5056	tags=52%, list=23%, signal=40%	POC1B/CEP120/OFD1/TCTN2/BBIP1/WDPCP/TTBK2/BBS4/CEP78/INVS/BBS1/DDX59/TTC21B/HYDIN/SMO/TTLL5/DNAJB13/B9D2/OCRL/DYNC2LI1/AHI1/C2CD3/TTC8/PKD2/EFHC1/SPATA7/PIBF1/CNGA1/KIAA0586/SDCCAG8/BBS9/RSPH3/CEP83/CEP164/NEK9/TMEM67/FLCN/TMEM231/KIF7/CEP41/IFT80/IFT172/NEK1/KIAA0753/TBC1D32/ANKS6/RPGRIP1L/ARL13B/TRIM32/ADCY6/MKKS/CEP290/DYNC2H1/WDR19/CFAP53/RSPH4A/TCTEX1D2/KIZ/NPHP1/WDR35/GAS8/CLUAP1/BBS5/BBS2/…
LINDGREN_BLADDER_CANCER_CLUSTER_2B	C2_curated	375	0.370774	1.82211	2.01741e-08	1.3535e-06	3550	tags=33%, list=16%, signal=28%	LGALS1/PDE1A/DUSP5/DDX3Y/TCF7/IL10RA/ICAM1/HTRA3/COL6A2/COL1A2/FBLN2/CCL2/CNN3/ARL4C/BCL2A1/IFITM1/ZAP70/MT2A/IL2RG/GADD45B/RGS2/COL6A1/NFKBIA/PLAUR/TNFAIP3/FILIP1L/NFKBIE/CRTAM/PCDH7/LEF1/LCK/ACTG2/TMEM158/RGL1/TTN/CRISPLD2/EFEMP1/MAFB/EDIL3/CYBB/SERPINF1/ADGRE5/PELI1/MCAM/IFI30/PPP1R16B/SPRY1/EMP3/IER2/RNASE6/CH25H/C3AR1/KLRG1/EFHD1/BIRC3/CYTH4/CDC42EP3/STXBP6/THBD/MYADM/EBI3/CNRIP1/RUNX3/CST7/…
GSE19923_E2A_KO_VS_HEB_AND_E2A_KO_DP_THYMOCYTE_UP	C7_immunologic	197	0.445917	2.04554	2.01759e-08	1.3535e-06	4057	tags=33%, list=19%, signal=27%	EIF1AY/TNF/CXCL3/HBEGF/CSF1/PHLDA1/SPP1/ECE1/IL6/SLFN12L/LDLR/MPO/BCL2A1/ZAP70/SLC2A3/TNFSF11/ACTG2/SH2D2A/PIM3/MAFB/GAL/GCH1/MYH8/FOSL1/F2RL3/CCR1/CD68/AREG/KLRG1/ELL2/FURIN/CFD/TRAF1/GEM/RGS10/TGFB1/ADAM8/NRAS/ISG20/CHMP4B/HMGCS1/IL10/MAPK6/IL4/CD82/ITK/NOCT/CYTIP/TXNDC17/EMP1/NAMPT/RFLNB/SQLE/TES/PALD1/TLE3/PTH/GTPBP4/NSMF/EIF1/IDI1/CCL1/SRP19/BTG1/RPIA
GO_OSSIFICATION	C5_GO	388	0.367231	1.81029	2.06807e-08	1.38435e-06	3598	tags=29%, list=17%, signal=25%	ROR2/TNF/CCL3/NPPC/CSF1/SNAI1/FOXC1/SPP1/FBN2/COL1A2/IL6/CEBPD/WNT10B/DMP1/KREMEN2/EGR2/IFITM1/PTHLH/OSR2/ACHE/TWIST1/ISG15/TNFSF11/CYP24A1/COL6A1/SLC24A3/RRAS2/MRC2/LEF1/JUNB/PTGS2/MSX2/SHH/SOX8/SEMA7A/FGR/WNT11/CSGALNACT1/CCR1/AREG/S1PR1/PTH1R/SH3PXD2B/SMPD3/BMP3/NELL1/CLEC3A/DHRS3/RIPPLY2/MYOC/RUNX3/COL13A1/RANBP3L/CEBPB/AXIN2/DHH/SOX2/ID2/CDH11/PTGER4/FFAR4/IGF1/CLIC1/EGFR/BMP8A/IFITM5/LRP3/N…
SANSOM_APC_TARGETS_DN	C2_curated	345	0.375296	1.82918	2.12117e-08	1.41683e-06	2994	tags=25%, list=14%, signal=22%	CD7/GSTM1/COL4A5/CCL5/PLPP1/HIC1/CCNA1/JCHAIN/IL4I1/CD70/ITGB7/IL2RB/AGR2/IRF4/PDE9A/IL12RB1/GPD1/PAX8/ACY3/CD28/SOAT2/ZAP70/CD6/RGS2/TYROBP/CD48/UPP1/CDKN2D/CD5/ITGAX/EDN3/GBP2/CD79A/CD3D/GHRL/CORO1A/CDKN2B/BASP1/LDB3/MGAT3/SULT2B1/CYP2S1/CHRNG/LSP1/BARX2/CST7/DPEP1/IRF1/CCR9/CD160/PLEKHO1/ICOS/NDFIP2/CHST2/SPIB/PAPSS2/ITGB2/AKR1B10/FLT3LG/AOC1/RGS10/GCG/TGFB1/CCK/RBP2/TCF21/GZMB/SLC22A4/ITGA3/S…
GSE18791_CTRL_VS_NEWCASTLE_VIRUS_DC_16H_DN	C7_immunologic	183	0.458069	2.07528	2.19576e-08	1.46347e-06	3810	tags=34%, list=18%, signal=29%	TNF/IRF8/TPSD1/DUSP5/IL11/PMAIP1/OASL/HTRA3/CREB5/LTA/ISG15/FAM107B/PTGS2/GBP5/IRAK2/ST7-AS1/RIPK2/GCH1/PELI1/CACNA1A/MARCKSL1/GHRL/CXCL9/BMP3/CSRNP1/EBI3/IRF1/IFIT3/CABP1/IFI6/ABTB2/PFKFB3/TRAF1/ARL5B/IFIT2/IL15RA/IL18RAP/EPSTI1/PAG1/RARG/TMCC3/LINC00608/FLJ13224/IRF7/PDE4B/ASH1L-AS1/NEXN/CMPK2/MASTL/FGFBP3/FAS/PLSCR2/PLA1A/HELZ2/MXD1/KCNQ1DN/IGHM/ARID5A/TOMM34/DHDH/PIGA/HOXD10/FEM1C
MODULE_92	C4_computational	147	0.485857	2.12435	2.26191e-08	1.50432e-06	3598	tags=35%, list=17%, signal=30%	CCL3/ADM/CXCL8/TNFSF9/STX1A/INHBA/LIF/CXCL10/CCL4/PDGFA/IL11/BAIAP3/IL6/TRH/S100A9/LTB/CCL2/ADRA2B/XCL1/ISG15/EDN3/CCR1/AREG/CXCL9/NQO1/NGF/EDN1/FURIN/PCDH1/IL3/ARL4D/LHB/CCL22/PCSK1/WNT4/ZYX/CARTPT/ASIP/OSM/CSF3/CCL18/SNPH/WNT5A/CCL15/TSHB/FGF9/CXCL13/NAMPT/ADORA2A/INSL4/FABP1/STC1
PID_ATF2_PATHWAY	C2_curated	58	0.626734	2.32813	2.27028e-08	1.50663e-06	1449	tags=29%, list=7%, signal=27%	DUSP8/HBG2/CXCL8/DUSP5/IL23A/PLAU/IL6/ATF3/ACHE/CCND1/DUSP10/JUNB/JDP2/PRKCA/GADD45A/SOCS3/HES1
GSE369_PRE_VS_POST_IL6_INJECTION_SOCS3_KO_LIVER_UP	C7_immunologic	191	0.44076	2.00968	2.28404e-08	1.51251e-06	6009	tags=43%, list=28%, signal=32%	PHLDA2/IL1RL1/SPP1/ITGB7/SERPINA1/S100A10/AQP9/DUSP4/BCL2A1/MIR22HG/S100A8/SLC2A3/TNFSF11/DUSP10/CDKN1A/PLIN2/TTN/NMB/BHLHE40/ADGRE5/KLF6/EZR/ETS2/FCGR1A/MAP1LC3B/GEM/SLC31A2/DDIT3/MTHFD2/CPB2/MAFF/ATP2B1/ZBTB43/GNG5/CD63/CD1C/PGAM1/ATF4/SERTAD2/RIOK3/TSC22D3/TXN/PTPRE/CYTIP/EMP1/CRIP1/TES/P2RY10/ADIPOQ/EIF1/UBE2J1/FEM1C/RBM3/YWHAQ/BTG1/ZNF267/B2M/CTNNAL1/BACH1/ARPC2/RNF139/APOH/SEC11A/PAFAH1B2/C…
RHEIN_ALL_GLUCOCORTICOID_THERAPY_UP	C2_curated	74	0.587244	2.27828	2.30486e-08	1.52303e-06	3601	tags=45%, list=17%, signal=37%	CXCL8/DUSP5/G0S2/GPR183/P2RX5/DUSP4/MIR22HG/S100A8/RGS2/MAP3K8/LY86/GPR65/ALAS2/PELI1/AREG/ABCA1/CH25H/EZR/SLC7A5/BIRC3/CSTA/CEBPB/AHNAK/ITGAM/MNDA/FOSL2/LY96/C15orf39/CYTIP/GPR18/LYZ/GABARAPL1/P2RY10
GSE13484_3H_UNSTIM_VS_YF17D_VACCINE_STIM_PBMC_DN	C7_immunologic	195	0.451257	2.06674	2.31954e-08	1.52946e-06	2951	tags=30%, list=14%, signal=26%	TNFRSF4/INHBA/HCAR3/CCL4/IL2RA/MARCKS/ICAM1/PMAIP1/OASL/PLAU/LDLR/CCR7/IFITM1/MT2A/APOBEC3A/BCL6/PLAUR/DNAAF1/PTGS2/NOX3/KCNJ2/ETV7/TCN1/PPP1R16B/BCL2L14/IER2/LY6E/CASP5/IRS1/ULBP1/SLC7A5/NLRP3/PARP8/ADCYAP1/ABTB2/RNF19B/TRAF1/SERPINA4/GEM/FGF5/IL15RA/FFAR2/IL18RAP/B3GNT2/STAP1/PIM1/CLIC4/P2RY14/MT1E/PDE4B/GNG5/IL10/IL12RB2/ITK/C3/HSP90AA1/HLA-DOB/TIPIN/TXN
DORN_ADENOVIRUS_INFECTION_32HR_DN	C2_curated	37	0.717161	2.43737	2.38791e-08	1.57119e-06	1491	tags=41%, list=7%, signal=38%	TNFRSF12A/IER3/CD83/SGK1/TRAF4/CCND1/NFKBIA/JUNB/EGR3/PLK2/MAP2K3/COL7A1/NFKB2/ELL2/NR4A1
MODULE_117	C4_computational	701	0.312621	1.62516	2.43353e-08	1.59779e-06	3994	tags=29%, list=18%, signal=25%	IRF8/HBG2/PRF1/HDC/ZFY/CXCL10/CCL4/IL11/IL2RA/SH2D1A/TPSAB1/JCHAIN/KYNU/TFPI2/TNNI2/CTRC/CYP1A1/STX11/GPR183/IL2RB/AGR2/IRF4/PDE9A/CREB5/FCN1/LTA/S100A9/GADD45G/TRAT1/S100A12/EPX/BCL2A1/FOXJ1/KCNQ2/SOCS1/SLC28A1/F12/TNFSF11/CYP24A1/TYROBP/PRTN3/LEF1/CXCL11/CD5/FUT5/TTN/ESRRG/GPR65/RIPK2/OVOL1/CYBB/MYH8/F2RL3/RPE65/CD68/UGT8/TCN1/RBM38/PRDM1/CADPS/CXCL9/MS4A3/CORO1A/CDKN2B/CASP5/ADTRP/BMP3/F11/ACT…
GSE21774_CD56_BRIGHT_VS_DIM_CD62L_POSITIVE_NK_CELL_UP	C7_immunologic	193	-0.459004	-2.05078	2.55003e-08	1.67073e-06	3902	tags=33%, list=18%, signal=27%	NAP1L3/ATP8A1/NTN4/METTL8/WRNIP1/KLF1/GFI1B/PRDM15/PSD3/VAMP5/TGFBR3/GPAM/COL5A1/ZFPM1/PER3/FGD3/EPDR1/MAST4/ITSN1/UNKL/SESN3/EPOR/CBFA2T2/CA2/ADCY6/PLXNC1/FRYL/PIP5K1B/GPR155/AMPD3/VWF/GCNT1/ITGA6/TRPC6/OSTM1/RAB40B/KLF11/MMRN1/SH3YL1/MED12L/AQP1/NCKAP1/ITGB3/GRB10/TCEANC2/DPY19L4/ABCA5/SPIRE1/MAP9/ZDHHC13/PPM1L/SYTL4/TBC1D8B/NFIA/CA1/SNX7/INSR/NBEA/SNX25/PLXDC2/WDFY3/ADCY9/PKP2/NDN
GSE23925_DARK_ZONE_VS_NAIVE_BCELL_DN	C7_immunologic	197	0.443776	2.03572	2.70384e-08	1.76775e-06	3850	tags=36%, list=18%, signal=30%	TNF/DUSP5/CCL4/DUSP2/CTRC/TRIB1/EGR2/TRAF4/BCL2A1/CD69/XCL1/HPCAL4/F12/TNFAIP3/JUNB/SH2D2A/PIM3/EFEMP1/GATA3/GCH1/EGR3/CBX4/IFFO2/SPRY1/IER2/NFKBID/CSRNP1/ZFP36/ELMSAN1/TMA7/NR4A1/PTTG1/NCAN/PLK3/ITPRIP/SLC3A2/ARL5B/PLVAP/GEM/SPINK5/MAFF/ZFP36L1/BCL2L11/MOB3A/EIF1B/MAPK6/HSPA5/NLRP9/MAG/PPP1R15B/NPTX2/SCAND1/PLA2G12B/DNAJB1/MLLT11/SPATA2/CACNG5/GCC1/TNFRSF21/SRF/MYOD1/PRKAB1/ARID5A/STK17B/MAPK8IP…
CUI_DEVELOPING_HEART_C5_VALVAR_CELL	C8_cellSignature	201	0.441447	2.03176	2.75114e-08	1.79487e-06	2067	tags=33%, list=10%, signal=30%	CXCL1/LGALS1/THBS1/MTRNR2L1/SNAI1/IER3/TUBB2A/S100A10/HS3ST1/HSPA2/CXCL2/ATF3/ZC3H12A/SFRP4/EGR2/MT2A/NEDD9/PTHLH/MMP19/TWIST1/GADD45B/BAG3/ERBB3/CYP1B1/FILIP1L/DSEL/APOE/JUNB/CDKN1A/PTGS2/DPYSL3/LMNA/SERTAD1/EDIL3/PAMR1/SERPINF1/EGR3/CADPS/IER2/MXRA5/CSRNP1/HSPA6/IRF1/SOX4/KLHL15/SOCS3/NTRK2/IFI6/HES1/DKK2/ID2/NR4A1/MFAP4/IGF1/AHR/ITM2A/TNFAIP6/GEM/RARG/SOX9/S100B/BTG2/PTPRZ1/DNAJB4/TIMP3/MAFF/I…
GO_MYELOID_LEUKOCYTE_DIFFERENTIATION	C5_GO	204	0.437585	2.01668	2.94545e-08	1.91759e-06	2855	tags=25%, list=13%, signal=22%	ROR2/TNF/CCL3/INHBA/LIF/CSF1/TESC/TRIB1/MMP9/GPR183/IL23A/RELB/IRF4/CCR7/TNFSF11/TYROBP/PRTN3/IL34/LEF1/JUNB/CSF2/MAFB/GATA3/FCER1G/PRKCA/VEGFA/CCR1/RARA/CSF1R/TSPAN2/LILRB3/CEBPB/ANXA2/IL25/ID2/MT1G/LILRB4/CCL19/TGFB1/ZFP36L1/CARTPT/IRF7/PIK3R1/KITLG/CSF3/IL17A/LILRB1/IL4/TLR2/NME1/DCSTAMP/UBASH3B
GSE5542_UNTREATED_VS_IFNA_TREATED_EPITHELIAL_CELLS_24H_DN	C7_immunologic	185	-0.469021	-2.07764	3.05285e-08	1.98333e-06	3640	tags=31%, list=17%, signal=26%	FGGY/EEF2K/NUP43/NUDCD3/ZNF740/DPH6/ALDH3A2/C12orf65/E2F5/GRAP/PCYOX1L/USP51/CEP41/KCNQ1/MINDY1/TCEA3/ARMCX1/LMLN/DENND2D/CEP68/EARS2/KIAA0895/LDLRAP1/ACBD4/KCNN4/ANKZF1/LMO7/IL6R/MMP28/SPPL2B/EFCAB13/ALPK1/TSPAN32/KCNMB4/NOG/C8orf37/TESPA1/KLHL3/CCDC102B/ZNF397/MYOM1/CDNF/TSEN2/FMO4/ZNF780B/SLC7A8/SLC40A1/PAQR8/ACKR3/CACHD1/SELP/N6AMT1/GATM/ZNF391/PRDM5/EPHX2/ZNF300/GABBR1
BURTON_ADIPOGENESIS_PEAK_AT_2HR	C2_curated	44	0.675656	2.38504	3.06778e-08	1.98884e-06	2044	tags=50%, list=9%, signal=45%	ADM/THBS1/PHLDA1/IER3/IL6/CEBPD/CXCL2/SERPINE1/GADD45G/RGS2/BAG3/JUNB/PTGS2/RHOB/MAP2K3/ZFP36/ETS2/TNFRSF1B/NR4A1/TNFAIP6/BTG2/DNAJB4
GSE30971_WBP7_HET_VS_KO_MACROPHAGE_4H_LPS_STIM_UP	C7_immunologic	190	0.453366	2.06504	3.0751e-08	1.9894e-06	4100	tags=35%, list=19%, signal=28%	ADM/PTX3/CXCL8/MSC/CXCL1/STX1A/CXCL3/PHLDA2/HIC1/TNFRSF9/G0S2/ICAM1/TREM1/ZC3H12A/PLP2/PLAUR/TNFAIP3/TUBB6/IRAK2/PPIF/FCER1G/OLIG2/FPR2/SH3PXD2B/SLC16A6/C17orf58/SLC7A5/EBI3/MSC-AS1/MFSD2A/RFX2/DGAT2/PLK3/C15orf48/TRAF1/TNFAIP6/MET/FFAR2/ALOX5AP/TIMM23/TMEFF1/C1QBP/NME1/ALDOA/PSMB5/PSMD7/WNT5A/AEN/ODC1/TXN/TUBB3/MAMLD1/ACVR1B/NETO2/DPP3/PLAA/TNIP2/TOMM34/TUBB4B/TNIP3/NIP7/MRPL47/SLC43A3/CD38/PKM/…
LEF1_UP.V1_UP	C6_oncogenic	193	0.438874	2.00062	3.19955e-08	2.06559e-06	2942	tags=30%, list=14%, signal=26%	ROR2/PRF1/LGALS1/WT1/GNG4/NRIP3/ARC/PDGFA/IL11/HAS2/G0S2/FLNC/SERPINE1/CCR7/EGR2/ZAP70/SLC2A3/COL6A1/STRA6/HBA2/SLC6A8/LCK/TMEM158/SH2D2A/GATA3/ARID3B/FOSL1/EGR3/EMP3/PDLIM4/NTSR1/KCNJ12/AXL/RAI2/RUNX3/IGFBP6/CST7/PLEKHO1/RGCC/TNFRSF1B/CHST2/SCN5A/TMEM47/L1CAM/VIM/PTGDS/RAMP2/EDAR/GZMB/TRPV6/MAP1B/CDKN2A/TUBB2B/DBN1/RBP1/WNT5A/GNG11
DAZARD_UV_RESPONSE_CLUSTER_G28	C2_curated	17	0.857535	2.39532	3.21254e-08	2.06964e-06	1554	tags=71%, list=7%, signal=66%	CXCL8/CXCL3/PHLDA2/PMAIP1/IER3/CXCL2/ATF3/GADD45B/PTGS2/GADD45A/ANXA2/MT1G
MIR186_5P	C3_motif	551	-0.343925	-1.70338	3.2424e-08	2.08453e-06	4793	tags=32%, list=22%, signal=26%	TRUB1/DZIP1/SIPA1L3/PHC3/RC3H2/FAM120A/TRAPPC8/SCML1/ARFGEF1/CRAMP1/FUT8/ACSS3/LPIN1/NIT2/TRMT10A/LUC7L3/YBX3/DEPDC1/MEIOC/BRWD3/USP37/SNTG1/LPP/RNF217/SMIM15/PID1/CPEB3/FKBP7/SPRYD3/VPS13B/RBM28/ATAD1/PHIP/ENTPD5/PRPF38B/IKZF2/SUMO4/TBL1XR1/NSD1/PIN4/LCORL/FSD1L/RGPD5/SMG1/SENP6/SAYSD1/TMTC1/MAP7/UBR3/ANO6/CREBZF/SORT1/SOX11/SLC36A4/VPS13C/PDE1C/CCDC84/STAU2/C12orf29/TMEM65/ARHGAP5/ASPH/PKD2/DIS…
MODULE_220	C4_computational	331	0.380212	1.84327	3.34841e-08	2.1482e-06	4309	tags=36%, list=20%, signal=29%	ROR2/CXCL8/CXCL1/LIF/CXCL10/HBEGF/EPS8/CSF1/IL11/FEZ1/ROR1/TNNI2/ITGB7/NGFR/IL6/PDCD1/WNT10B/EGR2/DLK1/NTRK1/RND1/MYL4/EPHA4/CYP1B1/EFNA5/ACTG2/APOE/DPYSL3/GPR65/SEMA7A/LDB2/EDN3/SERPINF1/ASIC2/UGT8/SIX3/RELN/EMP3/COL7A1/CDC42EP1/LAMA2/TNFAIP2/MYBL2/ITGB5/NELL1/ACTC1/NGF/SIX1/POU3F1/CPNE6/DHH/CRABP1/NTRK2/EPHB3/IL3/IGF1/KRT15/ITGB2/COL6A3/ZIC1/CLC/FGF5/KRT6B/L1CAM/RARG/NHLH2/FHL3/TBR1/LHB/NAB2/SO…
GSE18791_CTRL_VS_NEWCASTLE_VIRUS_DC_4H_DN	C7_immunologic	176	0.451785	2.03851	3.38588e-08	2.16773e-06	3937	tags=35%, list=18%, signal=29%	ADM/UTY/CXCL10/DUSP5/PMAIP1/OASL/CREB5/IFITM1/MT2A/NINJ1/APOBEC3A/NR4A3/GADD45B/ISG15/CXCL11/IRAK2/GCH1/PELI1/SYNPR/RAB11FIP1/NFKB2/RASAL1/CSRNP1/MAK/MYADM/IRF1/DUSP15/IFIT3/IFI6/HOMER1/TRAF1/TAP1/ARL5B/IFIT2/EPSTI1/DDIT4/SLC31A2/NACA2/DNAJB5/TMEM217/ZBTB43/IRF7/ISG20/ZBP1/CMPK2/MASTL/USP18/PLA1A/BPIFA2/HELZ2/MX1/C3orf38/NAMPT/FBXO34/CD80/NDC80/SPC24/C3orf36/B3GAT2/PATL1/LINC01004
MIR3925_3P	C3_motif	165	-0.482744	-2.10661	3.40116e-08	2.17301e-06	3397	tags=33%, list=16%, signal=28%	DPH6/PLCD4/ZNF701/ZNF761/NR1D2/C22orf46/ZNF514/GPD2/ZSWIM6/ZNF90/ZNF544/ZSCAN22/ZNF117/ZNF730/ZNF813/ZNF302/ZNF816/ZNF559-ZNF177/ZNF83/FAN1/ZNF138/ZNF600/ZNF493/ZFP90/ZBTB20/LYRM9/ZNF559/ZNF28/DAB2/ATXN7L1/EFNA3/CDH7/ZNF99/AKTIP/CABP4/ZNF763/ZNF439/AKAP12/PODXL/ZNF594/FZD4/ZC2HC1C/ZNF732/HGF/ZNF626/SLC4A5/ZNF718/PPP2R3A/PRTG/CDK14/ZNF578/CDH2/PKP2/ZNF208
BMI1_DN.V1_UP	C6_oncogenic	143	0.492611	2.14582	3.52396e-08	2.24682e-06	2057	tags=29%, list=9%, signal=26%	TNFSF9/CXCL1/STX1A/INHBA/LIF/HBEGF/CSF1/TNFRSF9/HAS2/TMEM51/F3/IGKC/GFPT2/PTHLH/CCND1/FGF21/CSF2/CRISPLD2/GAL/ADGRE5/GPRC5A/ABCA1/COL7A1/C3AR1/SLC29A1/SLC7A5/DHRS3/NT5E/COL13A1/SLC2A6/EDN1/FURIN/FGFR1/CLDN1/TNFAIP6/TAP1/TIE1/NRP2/BDKRB2/LRRC15/TIMP3
WORSCHECH_TUMOR_REJECTION_UP	C2_curated	61	0.613734	2.31126	3.61342e-08	2.2991e-06	2121	tags=36%, list=10%, signal=33%	TNFRSF4/CXCL3/CCL5/JCHAIN/IL4I1/IL1RAP/IRF4/EBF4/CXCL2/BCL2A1/IFITM1/IL2RG/TNFSF11/LCK/CXCL11/MSR1/TNFRSF1B/CCL4L2/CCL22/ACKR1/LILRB4/GZMB
GO_REGULATION_OF_LEUKOCYTE_MIGRATION	C5_GO	205	0.433198	2.00119	3.62277e-08	2.30031e-06	3295	tags=30%, list=15%, signal=26%	TNF/CCL3/TNFRSF18/CXCL8/CCL5/CXCL10/THBS1/CSF1/CCL4/CXCR3/ICAM1/IL23A/IL6/CCL2/SERPINE1/CCR7/XCL1/IL34/ANXA1/EDN3/VEGFA/C5AR1/CCR1/HMOX1/CD99/DYSF/FPR2/ADTRP/C3AR1/SMPD3/CSF1R/PGF/EDN1/RHOG/XG/PTGER4/PLVAP/DDT/PRSS56/CCL19/STAP1/CALR/AKIRIN1/PLA2G7/SLIT2/ADAM8/LGALS3/MIF/CCL25/KITLG/C1QBP/IL4/DAPK2/RHOA/RARRES2/WNT5A/CAMK1D/CXCL17/LGALS9/RHOH/GPR18/CXCL13
MITSIADES_RESPONSE_TO_APLIDIN_UP	C2_curated	421	0.35339	1.762	3.69998e-08	2.34451e-06	3847	tags=25%, list=18%, signal=21%	CCL3/PDE3B/TNFSF9/EGR4/DUSP5/ARC/HBEGF/DUSP2/MARCKS/ICAM1/TESC/TRIB1/OASL/BCL3/LAX1/PDE4A/LDLR/IFITM1/SOCS1/MIR22HG/PTHLH/NR4A3/BHLHE41/GADD45B/SLC2A3/RGS2/TIMP1/NFKBIA/DNAAF1/LCK/SH2D2A/PLIN2/KLF2/ARID3B/FOSL1/RHOB/AREG/KLF6/MAP2K3/MAPKAPK5-AS1/BASP1/C3AR1/EZR/BDNF/PARP8/PDGFB/GADD45A/IRF1/CEBPB/HES1/ID2/C1orf50/IGF1/ST3GAL5/CHST2/PFKFB3/MAP1LC3B/SLC3A2/GEM/TIGAR/ALOX5AP/COMP/STAP1/DDIT3/FAM53C/…
GO_POSITIVE_REGULATION_OF_MAPK_CASCADE	C5_GO	526	0.337836	1.7142	3.93636e-08	2.48918e-06	2437	tags=21%, list=11%, signal=19%	ROR2/TNF/CCL3/LIF/CCL5/DUSP5/THBS1/CCL4/PDGFA/IL11/ROR1/ICAM1/GPR183/IL6/LILRA5/FZD8/PROK2/CCL2/GPBAR1/GADD45G/ZC3H12A/CCR7/S100A12/ADRA2B/TRAF4/XCL1/NTRK1/GADD45B/GPER1/TENM1/TNFSF11/EPHA4/MAP3K8/IL34/HAVCR2/APOE/SH3RF3/IRAK2/FGF21/SEMA7A/RIPK2/SPRY2/PRKCA/EDN3/VEGFA/C5AR1/CHI3L1/CCR1/SLAMF1/APELA/FPR1/RELL2/GHRL/NOX4/MAP2K3/FPR2/CCL3L3/CSF1R/NGF/PDE6G/CCL3L1/TNFAIP8L3/CD27/BIRC7/PDGFB/IGFBP6/GA…
P53_DN.V2_UP	C6_oncogenic	145	0.476006	2.07373	3.97908e-08	2.51105e-06	2217	tags=26%, list=10%, signal=24%	PTX3/CXCL8/CXCL1/CCL4/TNFRSF9/IL1RN/DPF1/IER3/CD83/CLCF1/RELB/SDC4/CXCL2/CD69/LRRC32/NFKBIA/TNFAIP3/PRTN3/CD68/ATP12A/BPI/CH25H/NTSR1/RNF39/INSL3/BARX2/RND2/RFX2/PCDH1/SYN1/MT1G/ITM2A/ALOX5AP/RGR/FOSL2/OSGIN2/PRRG3/ETV5
RODWELL_AGING_KIDNEY_UP	C2_curated	473	0.349338	1.75196	3.9911e-08	2.5135e-06	4515	tags=32%, list=21%, signal=26%	IRF8/CXCL1/INHBA/CCL5/IL10RA/TPSAB1/JCHAIN/MYRF/IL4I1/HLA-G/SLC15A3/TESC/COL1A2/NKG7/IGKC/HCST/LTB/CCL2/ARL4C/PRAG1/BCL2A1/CD69/CHRNA3/IFITM1/BHLHE41/RAB31/TIMP1/CLEC7A/TYROBP/ZCCHC24/ODF3B/GBP5/IRAK2/MILR1/FCER1G/ADGRE5/CCR1/MCAM/SPON1/EMP3/LY6E/CORO1A/RNASE6/CHI3L2/PPP1R14A/MSR1/TNFAIP2/CSF1R/TRBC2/AXL/BIRC3/GABRP/INSL3/RUNX3/GPR61/NT5E/MIR34AHG/LST1/PLEKHO1/FSCN1/SOCS3/MPEG1/VSNL1/ANXA2/CDH11/…
GO_SIDE_OF_MEMBRANE	C5_GO	594	0.322797	1.65575	4.16364e-08	2.61682e-06	3337	tags=24%, list=15%, signal=21%	TNF/CD276/TNFRSF4/TNFRSF18/GNG4/CXCL10/THBS1/IL2RA/TNFRSF9/CXCR3/IL1RL1/HLA-G/ICAM1/F3/CD83/ECE1/IL2RB/PDCD1/IGKC/FCN1/IL12RB1/CD248/PTPN3/LDLR/CD28/CCR7/CD3E/IL5RA/CD69/ZAP70/CD6/IL2RG/HCK/RGS2/EFNA5/ANXA1/CNR2/LCK/RTN4RL2/CCR4/CD5/CLEC2B/TNFRSF13C/ULBP2/SEMA7A/FGR/FCER1G/EEF1A2/CD79A/SCUBE1/CCR1/MCAM/CD3D/S1PR1/ABCA1/CXCL9/CD33/MSR1/NTSR1/GNA15/ICOSLG/ULBP1/EZR/FRMD1/SRMS/TRBC2/SLC7A5/CHRNB2/TH…
GSE25087_FETAL_VS_ADULT_TREG_DN	C7_immunologic	180	-0.475273	-2.09217	4.19847e-08	2.6307e-06	4799	tags=42%, list=22%, signal=33%	LINC00294/BBS4/IDS/OXNAD1/C9orf72/RNPC3/KLF9/ABHD14A/ACVR2A/ARHGEF17/NEAT1/PLA2G12A/LCORL/ZNF532/PIK3C2A/GATAD1/KALRN/PKP4/ADCY1/NFATC2/MICAL3/VSIG1/NIFK-AS1/ADAM12/NR1D2/PURA/ZNF782/SORL1/OPHN1/SYNJ2BP/MATN1-AS1/LIAS/TMEM154/PATJ/C12orf42/COQ10A/KLHL6/ZFP36L2/CCDC66/IL6R/ENO2/OSTM1/ACSM3/TSPO/RAB11FIP3/KCNA3/LONRF3/SETD7/DCBLD1/CFAP70/CCL28/IQCH-AS1/SLC46A1/PPP1R26-AS1/ARHGEF12/SLC25A4/FZD4/SLC2…
GSE44649_WT_VS_MIR155_KO_NAIVE_CD8_TCELL_DN	C7_immunologic	198	0.436133	2	4.20278e-08	2.6307e-06	3131	tags=29%, list=14%, signal=25%	CCL5/CXCL10/ARC/DUSP2/IL2RA/IL1RN/MARCKS/IL4I1/OASL/SDC4/CNN3/CCR7/BCL2A1/CD69/GADD45B/ISG15/RRAS2/NFKBIA/CDKN1A/CXCL11/SEMA7A/JDP2/GBP2/GRIA1/BCL2L14/CDKN2B/BASP1/CSRNP1/CDC42EP3/CST7/BHLHE22/NECTIN2/FSCN1/SOCS3/ANXA2/PTGER4/ABTB2/IFITM2/PAPSS2/GLIPR2/REL/GYPC/PCSK1/CLIC4/CNTD1/TAGLN2/IRF7/PIK3R1/PLA2G4F/TUBB2B/FABP5/FLRT3/USP18/FGFBP3/PLEKHG2/CCDC71L/HELZ2/CACNA1S
GSE23925_LIGHT_ZONE_VS_NAIVE_BCELL_UP	C7_immunologic	196	0.438957	2.01054	4.22961e-08	2.64213e-06	3512	tags=34%, list=16%, signal=29%	DUSP5/CCL4/DUSP2/TRIB1/COL6A2/ATF3/CD28/CYP8B1/EGR2/BCL2A1/CD69/MIR22HG/CD6/NR4A3/MAP3K8/SLC6A8/TNFAIP3/FILIP1L/JUNB/SH2D2A/CCR4/CD5/GATA3/FAM83D/EGR3/CACNA1A/CBX4/SPRY1/IER2/NFKBID/CSRNP1/ZFP36/LRP12/RHOG/JPH3/PTPRN/TNFRSF1B/NR4A1/PLK3/ITPRIP/TRAF1/ARL5B/GEM/DOK7/NAB2/FRMD5/MAFF/FOSL2/P2RY14/ZFP36L1/MEX3C/SDE2/BCL2L11/ATF4/UGT2B10/PPP1R15B/CYTIP/MLLT11/NABP1/SLC25A25/SAMSN1/TPM3/MRPL52/SRF/PRKAB…
VERHAAK_GLIOBLASTOMA_MESENCHYMAL	C2_curated	213	0.429512	1.99598	4.25863e-08	2.65489e-06	3472	tags=31%, list=16%, signal=26%	LGALS1/THBS1/KYNU/SERPINA1/CLCF1/RELB/COL1A2/PLAU/SERPINE1/TIMP1/MRC2/PLAUR/TNFAIP3/ANXA1/CLEC2B/MAFB/SAT1/C5AR1/FCGR2A/CHI3L1/IFI30/RAB11FIP1/EMP3/CASP5/MSR1/LTBP1/GNA15/LILRB3/TRPM2/CYTH4/CSTA/THBD/BNC2/IGFBP6/SH2B3/CEBPB/RHOG/IQGAP1/FURIN/ANXA2/TNFRSF1B/NCF2/PTGER4/PLK3/CLIC1/ITGB2/IL15RA/SIGLEC9/BDKRB2/S100A11/ITGAM/LGALS3/ELF4/LY96/TLR2/CNN2/LOX/SLC10A3/CYTIP/TYMP/RAB32/MYO1F/LCP1/TES/NOD2
DURANTE_ADULT_OLFACTORY_NEUROEPITHELIUM_MACROPHAGES	C8_cellSignature	80	0.57353	2.27346	4.28604e-08	2.66659e-06	3695	tags=49%, list=17%, signal=41%	CCL3/CD83/GPR183/CEBPD/SGK1/RGS2/CLEC7A/TYROBP/PLAUR/LY86/APOE/FCER1G/APOC1/FCGR2A/CD68/IFI30/RNASE6/C3AR1/MSR1/CSF1R/CCL3L1/FCGR3A/LST1/COTL1/CCL4L2/C15orf48/ITGB2/RGS1/RGS10/HERPUD1/MNDA/CYBA/C3/YWHAH/TYMP/RAB32/AIF1/CXCL16/SPI1
GO_BITTER_TASTE_RECEPTOR_ACTIVITY	C5_GO	20	-0.827863	-2.36637	4.33097e-08	2.68912e-06	1826	tags=60%, list=8%, signal=55%	TAS2R30/TAS2R46/TAS2R3/TAS2R10/TAS2R43/TAS2R4/TAS2R5/TAS2R13/TAS2R31/TAS2R20/TAS2R50/TAS2R14
CROONQUIST_STROMAL_STIMULATION_UP	C2_curated	53	0.63472	2.33209	4.44962e-08	2.75724e-06	1733	tags=38%, list=8%, signal=35%	RPS4Y1/CCL3/CXCL1/CXCL3/CCL4/IER3/COL1A2/IL6/CXCL2/SERPINE1/RGS2/COL6A1/NFKBIA/IER2/BASP1/FSCN1/PIM2/SFTPB/COL6A3/TMSB4X
GSE3565_CTRL_VS_LPS_INJECTED_DUSP1_KO_SPLENOCYTES_UP	C7_immunologic	175	0.453645	2.04443	4.45861e-08	2.75728e-06	2166	tags=27%, list=10%, signal=25%	PRF1/LGALS1/CCL5/IL2RA/SH2D1A/IL1RL1/S100A10/NKG7/HCST/AQP9/SOAT2/ARL4C/SLC2A3/HAVCR2/ANXA1/TBX21/ITGAX/RIPK2/BHLHE40/ADGRE5/PRDM1/CCDC50/EMP3/GNA15/CSF1R/TSPAN2/ELL2/MYADM/NT5E/NFKBIB/ANXA2/TNFRSF1B/AHNAK/ID2/ARL4D/PTGER4/ARRDC3/ITGB2/IL15RA/L1CAM/IL18RAP/EPSTI1/LATS2/VIM/RGS1/GZMB/LGALS3/ATP2B1
PID_CD8_TCR_DOWNSTREAM_PATHWAY	C2_curated	65	0.610025	2.33361	4.56577e-08	2.8179e-06	2757	tags=32%, list=13%, signal=28%	TNF/TNFRSF4/TNFRSF18/PRF1/EGR4/IL2RA/TNFRSF9/IL2RB/CD3E/IL2RG/JUNB/PRKCA/FOSL1/CD3D/IFNA7/GZMB/NRAS/IFNA10/IFNA5/CD8A/HLA-A
CHARAFE_BREAST_CANCER_LUMINAL_VS_MESENCHYMAL_DN	C2_curated	449	0.346524	1.73433	4.67977e-08	2.88249e-06	2944	tags=25%, list=14%, signal=22%	PTX3/INHBA/PDGFA/IL11/HAS2/G0S2/HOTAIRM1/FOXC1/MXRA7/COL6A2/FLNC/PLAU/IL6/SGK1/CXCL2/PDE4A/GFPT2/IGF2BP3/SERPINE1/PLP2/RGS2/RAB31/TIMP1/COL6A1/MRC2/TNFAIP3/ZCCHC24/ANXA1/TUBB6/TMEM158/UPP1/PTGS2/IRAK2/AK5/EIF5A2/TRNP1/SPRY2/EDIL3/TOX2/PRKCA/PRR16/FOSL1/ADGRE5/MCAM/CD99/PDE7B/CCDC50/EMP3/BASP1/BDNF/AXL/TNFRSF10D/C17orf49/CNRIP1/BNC2/IGFBP6/NT5E/GADD45A/COL13A1/NECTIN3/SH2B3/APCDD1L/FSCN1/SOCS3/ANX…
GSE7348_UNSTIM_VS_TOLERIZED_AND_LPS_STIM_MACROPHAGE_UP	C7_immunologic	158	-0.488389	-2.10947	4.72698e-08	2.90577e-06	5899	tags=46%, list=27%, signal=33%	USP20/NBEAL2/WWP1/RAB3A/CD151/NAP1L4/RIF1/PNKP/ARHGAP27/HMG20A/WDR81/FTSJ3/SFMBT1/MTIF2/EHMT1/TUBGCP6/CTBP2/OSBPL2/FAM78A/BBS4/RBBP5/NCKIPSD/CRAMP1/OXSM/ABCD4/TBXAS1/HCFC2/TCF12/CERK/NSD1/TWNK/TIA1/PAN3/PREB/PRKCH/LRP6/PRKAG2/B3GNT8/TMEM86A/FAHD1/ACOX3/NT5DC3/OPHN1/SNAPC4/AKAP10/CNNM3/MINDY2/URB1/MARVELD1/TANGO6/RDH13/KIF13A/GCNT1/ZSCAN20/TNRC6C/C2CD2/ARL11/PVT1/ATP10D/POLI/ORC5/PRUNE1/ZNF638/ACY…
GSE43863_DAY6_EFF_VS_DAY150_MEM_TH1_CD4_TCELL_DN	C7_immunologic	191	0.435447	1.98545	4.75757e-08	2.91876e-06	2425	tags=25%, list=11%, signal=23%	PDE3B/CXCL10/IL2RA/BCL3/CLCF1/IL6/LTA/CCR7/HCK/GADD45B/GPER1/FAM107B/RRAS2/DUSP10/TNFAIP3/TBX21/GBP2/PELI1/STRIP2/SLAMF1/SLC17A7/BASP1/MYBL2/ICOSLG/TSPAN2/BIRC3/EBI3/FSCN1/SOCS3/TLCD1/PIM2/FCER2/FFAR4/UBALD2/PLVAP/IRGM/HIVEP1/NFKB1/NFIL3/B3GNT2/SMAGP/TMCC3/RND3/TAGLN2/TNFRSF13B/OSM/DENND3/IL10
GO_RESPONSE_TO_ORGANIC_CYCLIC_COMPOUND	C5_GO	919	0.292791	1.54781	4.7749e-08	2.92358e-06	4680	tags=27%, list=22%, signal=22%	TNF/CCL3/ADM/KDM5D/ZNF703/LGALS1/INHBA/WT1/CCL5/CXCL10/THBS1/FOXA1/NFATC4/PLPP1/IL1RN/KYNU/STAR/ICAM1/PMAIP1/SPP1/CYP1A1/CD83/IL6/SSTR2/P2RX5/WNT10B/CHRM4/AQP9/CCL2/GPD1/GPBAR1/ZC3H12A/HPGD/GHRHR/MMP19/NR4A3/GPER1/CYP24A1/CCND1/NFKBIA/CYP1B1/EFNA5/ANXA1/LEF1/CDKN1A/PLIN2/PTGS2/MSX2/CDKN2D/CRYAB/ESRRG/STAT1/KLF2/RIPK2/CYBB/SERPINF1/FOSL1/GABRB2/PELI1/AREG/ABCA1/NOX4/RARA/DRD5/ADTRP/VGF/TPH2/GNA15/…
GSE13547_WT_VS_ZFX_KO_BCELL_DN	C7_immunologic	168	0.458688	2.05278	4.86203e-08	2.96933e-06	6126	tags=45%, list=28%, signal=33%	CXCL10/PHLDA1/TNFRSF9/PMAIP1/IRF4/NKG7/S100A9/SYTL3/IFITM1/GADD45B/MYL4/HAVCR2/ANXA1/ITGAX/PRDM1/CCDC50/NCALD/MYADM/ACOT7/EFHD2/ID2/NR4A1/CLIC1/GEM/PSMC3IP/COX5A/ROM1/NFIL3/VIM/LILRB4/RGS1/CLIC4/IL12RB2/NME1/PSMA1/ACTG1/CENPH/PSMB2/GMDS/TXNDC17/EMP1/DBI/KIF11/PRELID1/GABARAPL1/CRIP1/NCAPH/GGH/AIF1/CALM1/SPC24/ESM1/FKBP2/NDUFS6/BEX3/ETFB/PSMD8/STMN1/SNF8/IFITM3/RBBP8/PGK1/HMGN2/TRIP13/GYG1/MAD2L1/…
GSE9960_HEALTHY_VS_GRAM_NEG_SEPSIS_PBMC_DN	C7_immunologic	193	0.435739	1.98633	4.86885e-08	2.96933e-06	3726	tags=30%, list=17%, signal=25%	ADM/CXCL8/INHBA/DUSP5/GPR84/PLPP1/TNFRSF9/G0S2/F3/BCL3/SERPINA1/SERPINE1/DUSP4/LRRC32/HCK/NFKBIA/PLAUR/IRAK2/GCH1/GABRB2/SLAMF1/PPP1R16B/CLEC4D/CSRNP1/ELL2/BHLHE22/AHR/CHST2/RNF19B/TRAF1/HEXIM1/NFKB1/MYO1G/RGS1/CLIC4/TAGLN2/IRF7/OSM/ISG20/TMEFF1/MTFP1/C3/MIR3945HG/PSMA1/CMTM6/TICAM1/EAF1/FBRS/CYTIP/NABP1/SLC25A25/PSMA2/ZIC2/ARL8B/CALM1/TNIP3/LAP3
GSE23568_CTRL_TRANSDUCED_VS_WT_CD8_TCELL_DN	C7_immunologic	196	0.437675	2.00467	4.89306e-08	2.97821e-06	3546	tags=28%, list=16%, signal=24%	TNFRSF4/CD96/CCL5/DUSP2/TCF7/ITGB7/LTA/SGK1/CD28/ARL4C/CCR7/CD3E/PACSIN1/ZAP70/CD6/ISG15/TNFSF11/HBA2/CRTAM/LCK/SH2D2A/CD5/PITPNM1/CD3D/ACTN2/SLC29A1/CD27/GADD45A/CST7/RGCC/ID2/NR4A1/ITM2A/TRAF1/MIDN/TAP1/ROM1/BOP1/NAB2/RGS10/ZYX/IRF7/IL4/ITM2C/KLK8/FAS/CTSW/TLE1/SLC25A25/MYO1F/RFLNB/VSX2/PPP4C/ZNF467/TNIP1
GSE40274_CTRL_VS_FOXP3_AND_LEF1_TRANSDUCED_ACTIVATED_CD4_TCELL_UP	C7_immunologic	162	0.467636	2.07845	4.9719e-08	3.01787e-06	2909	tags=35%, list=13%, signal=31%	CCL5/GPR84/SH2D1A/CXCR3/F3/MMP9/STX11/IL2RB/NKG7/CEBPD/S100A9/RASL11A/DUSP4/ADGRG5/TRAF4/LRRC32/PLCD3/ADAMTS14/MAP3K8/CHST1/LEF1/CCR4/VEGFA/PAK6/DAPL1/IER2/C3AR1/NFKBID/CYP2S1/CLEC4D/CD27/GPR132/NT5E/SLC2A6/MFSD2A/TIGIT/SLC35B2/AHNAK/ARL4D/HOMER1/ITM2A/IL18RAP/NAB2/PIM1/MAFF/ITGAM/GZMB/TMSB10/TOX/IL10/IL12RB2/ITK/SERTAD2/KLK8/GPR176/CTSW/LAT
GSE14000_UNSTIM_VS_4H_LPS_DC_DN	C7_immunologic	192	0.441311	2.00907	4.97779e-08	3.01787e-06	2732	tags=29%, list=13%, signal=26%	MSC/CCL5/DUSP5/CCL4/KYNU/PMAIP1/OASL/ATF3/BCL2A1/IFITM1/MT2A/NINJ1/APOBEC3A/NR4A3/ISG15/NFKBIA/DNAAF1/CXCL11/GBP5/PIM3/ST7-AS1/EPOP/GBP1/GBP2/GCH1/ETV7/BCL2L14/TNFAIP2/MAK/ELL2/RUNX3/IRF1/NECTIN3/IFIT3/IFI6/PTGER4/TRAF1/TNFAIP6/IFIT2/EPSTI1/RARG/SLC31A2/STAP1/BTG2/DNAJB4/IRF7/ISG20/TMEFF1/CSRP2/TNC/UBXN2A/CMPK2/LILRB1/MIR3945HG/CKAP4/USP18
MIR124_3P	C3_motif	731	-0.321527	-1.62691	4.99774e-08	3.01906e-06	3595	tags=22%, list=17%, signal=19%	NFATC2/HTATIP2/ERMP1/SLC33A1/CLOCK/ARHGAP28/PPP1R13L/PRKAG2/ATF7IP/FKBP15/CPNE3/ULK2/GPAM/KIF26B/ANKRD44/MBOAT2/TMBIM1/NFIX/SHANK2/HIVEP2/ABCC4/PALLD/SUMF1/E2F5/LCLAT1/CXADR/TMEM87B/POGLUT1/RAI14/RASSF8/AKT3/TNRC6B/ATL3/ENDOD1/IPO8/ATP6V0A2/GTF2A1/KIF3A/EVI5/PAPOLG/ZNF608/ORC2/KLLN/IQGAP2/CD164/SH3PXD2A/ATF7/TARBP1/ZSCAN22/CNTN1/LDLRAP1/FBXO38/SNX16/ZFP36L2/LRRC1/PPARA/JAKMIP3/FAM120C/CHIC1/CDON/…
VART_KSHV_INFECTION_ANGIOGENIC_MARKERS_UP	C2_curated	160	0.463005	2.062	4.99932e-08	3.01906e-06	2057	tags=28%, list=9%, signal=25%	TNF/ADM/CXCL3/CCL5/CXCL10/PDGFA/SPP1/F3/MMP9/PLAU/IL6/WNT10B/CXCL2/WNT1/SFRP4/DLK1/MMP19/TIMP1/EPHA4/PLAUR/SH2D2A/PTGS2/CXCL11/VEGFA/SERPINF1/WNT10A/S1PR1/HMOX1/CXCL9/TNFAIP2/KRT1/PGF/PDGFB/EPHB3/FGFR1/IGF1/SYN1/WNT5B/TIE1/EPHA3/NRP2/CALR/TGFB1/TIMP3
NFKAPPAB65_01	C3_motif	237	0.415175	1.94401	5.15893e-08	3.10746e-06	2033	tags=23%, list=9%, signal=21%	MSC/GNG4/CCL5/CXCL10/BCL6B/TNFRSF9/ICAM1/CD70/IER3/MMP9/BCL3/RELB/WNT10B/LTB/SDC4/TRAF4/CD69/PTHLH/GADD45B/RND1/IER5/NFKBIA/MAP3K8/CXCL11/KCNN2/TRIB2/BMF/ZMYND15/WNT10A/NFKBID/SLC16A6/SMPD3/CSF1R/NFKB2/BDNF/BIRC3/ELMSAN1/PARP8/S1PR2/SH2B3/RASGRP4/NFKBIB/TNFRSF1B/EIF5A/RAP2C/LAMA1/REL/PCDH10/ABI3/HIVEP1/TLX3/MSX1/PPP1R13B/WNT4
GO_TUBE_MORPHOGENESIS	C5_GO	826	0.299886	1.57295	5.16585e-08	3.10746e-06	3514	tags=25%, list=16%, signal=22%	TNF/ADM/PDE3B/CXCL8/WT1/CXCL10/THBS1/FOXA1/CSF1/NFATC4/PDGFA/TCF7/NTN1/TNFRSF12A/HAS2/CXCR3/ADGRA2/HLA-G/FOXC1/F3/NGFR/AGR2/IL6/FZD8/SDC4/TRIM71/WNT1/PROK2/CCL2/HOXA1/PAX8/SERPINE1/LDLR/ZC3H12A/SEMA6A/HPGD/PLCD3/MMP19/NR4A3/TWIST1/GREB1L/HLX/STRA6/EPHA4/RNF207/TNFAIP3/CYP1B1/WNK4/DNAAF1/ANXA1/TBX21/LEF1/APOE/JUNB/SH2D2A/PTGS2/SHROOM3/MSX2/SHH/SOX8/STAT1/KLF2/ITGAX/WNT11/SPRY2/GATA3/PRKCA/SAT1/RDH…
GO_REGULATION_OF_MYELOID_LEUKOCYTE_DIFFERENTIATION	C5_GO	118	0.510154	2.16307	5.22422e-08	3.13646e-06	2855	tags=28%, list=13%, signal=24%	ROR2/TNF/CCL3/INHBA/LIF/CSF1/TESC/TRIB1/IL23A/TNFSF11/TYROBP/IL34/LEF1/MAFB/PRKCA/CCR1/RARA/LILRB3/CEBPB/ID2/LILRB4/TGFB1/ZFP36L1/CARTPT/IRF7/PIK3R1/KITLG/IL17A/LILRB1/IL4/NME1/DCSTAMP/UBASH3B
GO_REGULATION_OF_T_CELL_DIFFERENTIATION	C5_GO	147	0.478525	2.09229	5.24557e-08	3.14316e-06	2573	tags=31%, list=12%, signal=27%	TNFRSF18/TNFSF9/IL2RA/TCF7/HLA-G/CD83/IL23A/IRF4/IL12RB1/CD28/ZC3H12A/FOXJ1/SOCS1/ZAP70/BCL6/HLX/DUSP10/ANXA1/TBX21/CRTAM/LEF1/SHH/RIPK2/GATA3/EGR3/PRDM1/ZNF683/RARA/NFKBID/NRARP/NLRP3/CD27/RUNX3/IRF1/SOX4/SPINK5/LILRB4/CCL19/ADAM8/SMAD7/FOXN1/TOX/GLI2/SLC46A2/IL4
GEORGES_TARGETS_OF_MIR192_AND_MIR215	C2_curated	863	-0.310912	-1.60095	5.37385e-08	3.20999e-06	4709	tags=30%, list=22%, signal=25%	ARFGEF1/FAIM/ZBTB14/RACGAP1/NIPA1/NIN/CIT/RAP1GAP/MAN2A2/TJP2/CEP78/NLK/SMARCA2/UNG/RNPC3/OSBPL10/FBXW2/USP34/DEPDC1/ALG10/CLK1/ZNF611/NT5M/ACVR2A/RAB6C/BIVM/ATAD1/CHST12/AASDHPPT/KHDRBS3/PRKD3/CCDC18/FBXO3/HAUS3/SATB2/CTPS2/TICRR/HERC2/HS3ST3B1/SPIN4/FGFR1OP/CEP295/NHSL1/SAYSD1/FOS/SLC9A5/ANO6/MEX3B/CREBZF/OSBPL6/VPS13C/GATAD1/ALDH5A1/FBXO4/INIP/SLC19A2/CENPI/RPAP2/HAS3/KIF14/FAM111B/GALNT12/ZNF…
GSE6269_HEALTHY_VS_E_COLI_INF_PBMC_UP	C7_immunologic	172	-0.466702	-2.05833	5.3779e-08	3.20999e-06	6614	tags=59%, list=30%, signal=42%	DDHD2/FAM193A/USP11/NLRP1/COBLL1/SEC24C/GLS/PILRB/SUGP2/PUS1/NRF1/NUP85/RASGRP2/NPC1/ZFP30/MIA3/PRSS23/PHTF1/PCNX1/TAF1C/PDXDC1/PIGG/RER1/GSE1/PPOX/NFATC2IP/MRS2/SFI1/CXXC1/CHKB/PDE4DIP/SLC5A3/ICMT/PLG/HLA-DQA1/AKAP1/ABCD4/PSD4/POLG2/FAM160B2/IRF3/ABHD14A/HPS4/ZGPAT/DNAJC16/WDR59/MLEC/HLA-DQB1/ITFG2/TAF4/ZNF419/CRELD1/MPHOSPH8/PIAS4/CLK2/AGAP4/ADAM28/ZNF45/MICAL3/METTL3/LLGL2/SGSM3/MECP2/ARHGAP25…
GSE41867_NAIVE_VS_DAY30_LCMV_CLONE13_EXHAUSTED_CD8_TCELL_UP	C7_immunologic	185	0.442933	2.01191	5.39066e-08	3.2114e-06	3685	tags=35%, list=17%, signal=29%	ADM/CCL5/DUSP5/CCL4/OASL/STX11/CD83/GPR183/IL6/SDC4/CXorf65/SERPINE1/NINJ1/APOBEC3A/MAP3K8/DNAAF1/PTGS2/PIM3/TTN/STAT1/RIPK2/KCNJ2/GCH1/PELI1/SLAMF1/FXYD6/CXCL9/MAP2K3/CDKN2B/IDO2/CSRNP1/ISX/PRG3/NECTIN3/C15orf32/BHLHE22/PLK3/ABTB2/C4orf46/MASP1/IL18RAP/EPSTI1/SIPA1L1/GRHL1/SNN/TSPO2/SLC1A2/MIR3945HG/ZBTB10/USP18/NOCT/HELZ2/TSHB/C3orf38/UBE2L6/MXD1/NAMPT/ADORA2A/TNIP2/SPAG1/PALM3/FCGR1B/EHD1/TNIP…
MODULE_55	C4_computational	815	0.303685	1.59339	5.49216e-08	3.26556e-06	3563	tags=26%, list=16%, signal=23%	ADM/CP/TMSB4Y/PRF1/STX1A/GPR3/LIF/GSTM1/HBEGF/PHLDA1/PHLDA2/TCF7/IL1RN/MYRF/G0S2/SPP1/FBN2/IER3/TRIB1/SERPINA1/COL6A2/NGFR/COL1A2/PLAU/SSTR2/S100A9/WNT10B/CYP2F1/HSPA2/AQP9/CCL2/GFPT2/SERPINE1/GADD45G/LDLR/MPO/HPGD/PRG2/PEG10/LRRC32/DLK1/CD6/S100A8/IL2RG/GADD45B/ISG15/F12/SLC2A3/RAB31/RND1/COL6A1/HAP1/CCND1/ERBB3/APOE/JUNB/PLIN2/GC/CRYAB/RCVRN/GLYAT/FEV/ALAS2/FXYD2/VEGFA/RAMP1/GCH1/ITIH2/APOC1/RH…
CUI_DEVELOPING_HEART_C7_MAST_CELL	C8_cellSignature	148	0.475791	2.08902	5.61886e-08	3.33447e-06	3280	tags=31%, list=15%, signal=27%	TPSB2/HDC/LIF/TPSAB1/IL1RL1/CD83/HS3ST1/HPGD/PRG2/CD69/SLC2A3/RGS2/TYROBP/DUSP10/NFKBIA/TNFAIP3/ANXA1/PLIN2/GPR65/SERTAD1/HPGDS/FCER1G/EMP3/IER2/ZFP36/CNRIP1/RHOG/IFITM2/SH3BGRL3/CLIC1/VMP1/PAG1/LPXN/ALOX5AP/RGS1/BTG2/ITGAM/ADAM8/TMEM176B/TSC22D3/LAT/DNAJB1/NABP1/RHOH/LCP1/SAMSN1
GO_GLIOGENESIS	C5_GO	294	0.385816	1.84701	5.86008e-08	3.47095e-06	2080	tags=23%, list=10%, signal=21%	ROR2/TNF/CCL3/TPPP/LIF/CSF1/MYRF/ROR1/CLCF1/GPR183/IL6/LTA/S100A9/DLX2/CCL2/LDLR/EGR2/EMX1/PHOX2B/S100A8/EPHA4/DUSP10/ERBB3/IL34/ANXA1/LEF1/SHH/SOX8/CNTF/PRDM8/OLIG1/OLIG2/C5AR1/AZU1/AREG/RELN/FPR2/LAMA2/CSF1R/TSPAN2/PITX3/MYOC/E2F1/SOX4/POU3F1/DAAM2/TNFRSF1B/NTRK2/HES1/SOX2/ADCYAP1/ID2/NEUROD4/EGFR/FGF5/DAB2IP/NCMAP/VIM/NAB2/SOX9/STAP1/S100B/GCM2/TGFB1/RTN4/PTPRZ1/RNF112
ZHU_CMV_ALL_UP	C2_curated	105	0.527251	2.19404	6.05154e-08	3.57748e-06	3840	tags=40%, list=18%, signal=33%	CCL5/CXCL10/IL11/TFPI2/TUBB2A/IL6/IFITM1/NR4A3/ISG15/NFKBIA/TNFAIP3/PTGS2/GAL/GBP1/GCH1/SLC7A5/IRF1/IFI6/NR4A1/FGFR1/TAP1/LATS2/NFKB1/MSX1/PIM1/UBE2S/HSPE1/TUBA4A/ALAS1/ITGA8/GTF2B/ENO1/PSMB2/MLLT11/MX1/NAMPT/SRF/PSMA2/BCL7B/IFNB1/EGR1/RANBP1
ICHIBA_GRAFT_VERSUS_HOST_DISEASE_D7_UP	C2_curated	112	0.5181	2.19376	6.08639e-08	3.5912e-06	2810	tags=33%, list=13%, signal=29%	EIF1AY/IRF8/CXCL10/IL1RN/ICAM1/CXCL2/CCL2/BCL2A1/SOCS1/LGALS3BP/HCK/ISG15/TYROBP/NFKBIA/LY86/STAT1/GBP2/CXCL9/MSR1/GBP7/IRF1/IFIT3/MPEG1/RNF19B/CLIC1/TAP1/IRGM/TMSB4X/LILRB4/MNDA/IRF7/SAMHD1/TMSB10/CYBA/USP18/FAS/RNASE2
GO_POSITIVE_REGULATION_OF_IMMUNE_RESPONSE	C5_GO	724	0.307369	1.59389	6.22064e-08	3.66341e-06	4586	tags=28%, list=21%, signal=23%	TNF/CD276/CCL5/SH2D1A/HLA-G/CLCF1/LAX1/IL23A/RELB/IL6/NCR3/IGKC/FCN1/LTA/IL12RB1/PYHIN1/CD177/CD28/ZC3H12A/TRAT1/CCR7/CD3E/XCL1/ZAP70/NR4A3/HCK/HLX/HAVCR2/ANXA1/TBX21/CRTAM/LCK/GPR31/TNFRSF13C/GBP5/MUC4/SEMA7A/RIPK2/FGR/GATA3/IGLV1-40/GBP1/FCER1G/C5AR1/CD79A/SUSD4/FCGR2A/UBASH3A/CD3D/FPR1/RARA/FPR2/C3AR1/NFKBID/SLC22A13/ICOSLG/PSMA8/EZR/CLEC4D/TRBC2/SLC7A5/KRT1/PIK3R2/NLRP3/CD1B/FCGR3A/CD160/NECT…
GO_REGULATION_OF_ALPHA_BETA_T_CELL_ACTIVATION	C5_GO	96	0.539705	2.20797	6.47505e-08	3.80597e-06	1270	tags=28%, list=6%, signal=27%	CD83/IL23A/IRF4/IL12RB1/CD28/ZC3H12A/CD3E/XCL1/SOCS1/ZAP70/BCL6/HLX/ANXA1/TBX21/CRTAM/SHH/RIPK2/GATA3/PRDM1/ZNF683/RARA/NFKBID/NLRP3/EBI3/RUNX3/IRF1/CD160
IVANOVA_HEMATOPOIESIS_STEM_CELL_LONG_TERM	C2_curated	211	-0.437893	-1.97406	6.51611e-08	3.82283e-06	3647	tags=34%, list=17%, signal=28%	AKAP9/ANGPT1/HOXA5/SPATA7/CCSER1/BCL9L/ST8SIA4/MBOAT2/ZMYND11/CLIP4/NT5DC3/VNN1/ZAN/ELAVL4/SCAPER/ZNF354A/ZMYM6/ZFP92/ADARB1/CSAD/CNTN1/IGF1R/CHIC1/MGA/TMEM144/FUT10/SCARF1/ANKZF1/HLF/TCF7L1/UFSP2/ZKSCAN1/SMIM17/ZBTB20/KIF6/IFT43/C9orf152/PCLO/ADAM22/STX1B/RASAL2/HOXA3/MYOM1/SIX5/KAZALD1/C11orf54/TNS1/JAM2/ICK/LARGE1/FSTL1/HOXA10/ARHGEF10/MYO5C/FAAH/RORA/PCDH9/DSG2/NBEA/ANOS1/BACE2/PLSCR4/BICC1/O…
MIR5696	C3_motif	689	-0.326456	-1.65054	6.56248e-08	3.84273e-06	4025	tags=26%, list=19%, signal=22%	FAR1/PRDM10/SENP6/ZNF532/TMTC1/AFF3/RRH/UHRF2/TTC33/CTSO/UBE3C/GATAD1/ATP8A1/RFX3/MYEF2/LSM11/LIMD1/TMEM170B/C5orf47/HDAC8/KANK2/LRP6/NUP43/FANCF/ARMC2/RPS6KA6/DCP2/CHURC1/ANKRD44/POMGNT2/ZFP69/TRAK2/RWDD3/RIN2/SDCCAG8/SCAI/LZTR1/NCEH1/BRCC3/OMG/CCSER2/TMEM169/DTNA/ZFPM2/ELAVL4/SNX13/SOBP/CREB1/DPYD/RABGEF1/DENND4C/IDNK/INTS2/MTAP/NSF/PAPOLG/ZFHX3/TMEM135/ITGB8/IQGAP2/ZNF519/TMX3/MBTPS2/TLR5/LIMA…
EGFR_UP.V1_UP	C6_oncogenic	184	0.444284	2.0149	6.61191e-08	3.86433e-06	2357	tags=29%, list=11%, signal=26%	ADM/INHBA/LIF/DUSP5/HBEGF/PHLDA1/ICAM1/PMAIP1/TUBB2A/SOWAHC/BCL3/CEBPD/S100A9/HSPA2/CCL2/ATF3/DUSP4/MIR22HG/S100A8/RND1/CYP1B1/ACTG2/JUNB/S100P/CRISPLD2/GAL/GBP1/CSGALNACT1/SAT1/GBP2/NFKB2/ELL2/ETS2/IRF1/FERMT2/EDN1/KCNS3/CEMIP/IFIT3/COTL1/HOMER1/PAPSS2/CLDN1/TAP1/EGFR/IL15RA/NFIL3/CCL22/ETV5/ITGA3/PDE4B/FGG/ISG20
GSE36826_NORMAL_VS_STAPH_AUREUS_INF_SKIN_UP	C7_immunologic	189	0.443536	2.01555	6.79532e-08	3.96402e-06	6159	tags=41%, list=28%, signal=30%	CXCL8/MSC/THBS1/KYNU/TREM1/FCN1/S100A9/AQP9/LFNG/CCR7/MIR22HG/FILIP1L/TMEM158/S100P/CD5/VEGFA/FPR1/CORO1A/SLC16A6/BIRC3/CST7/RHOG/TRAF1/SLC3A2/FHL3/PDE4D/LPXN/DNAJB5/MYCL/CHCHD2/SLC35B1/ISG20/NME1/PSMA1/GAPDH/C15orf39/ITGAE/PFN1/GNG11/CYTIP/TYMP/MAMLD1/NAMPT/PPP4C/SNRPB/SQLE/TES/ORMDL2/CST6/FLNA/YKT6/PTP4A2/GMIP/BTG1/APOBR/TFE3/KLRC3/PSME3/BACH1/HMGCR/JUND/EIF6/ENY2/PGD/ARAP3/PSMC3/STK38L/PUF60/M…
MODULE_123	C4_computational	246	0.407316	1.90978	6.87805e-08	4.00471e-06	4657	tags=35%, list=21%, signal=28%	CCL3/CXCL8/EGR4/CXCL1/HCAR3/NFATC4/DPF1/GAS7/BCL3/GPR183/CXCL2/ATF3/EGR2/PHOX2B/BCL6/ADRB1/JUNB/CDKN1A/STAT1/OVOL1/OLIG2/C5AR1/FOSL1/CBX4/FPR1/CXCL9/KLF6/RARA/CDKN2B/MYBL2/NFKB2/RUNX3/ETS2/IRF1/SOX4/POU3F1/RFX2/PTGER4/REL/ADNP2/HIVEP1/NFKB1/SOX9/MSX1/RGR/MEOX1/MYCL/INSM1/MNDA/FOSL2/P2RY14/ZBTB43/ELF4/CDKN2A/GTF2B/GRPR/HOXB1/TLE1/SCAND1/HMGB2/TFAP2A/PAX2/IRX5/MXD1/MYOD1/GNAI2/FOXM1/TLE3/AIF1/ETV1/…
AMIT_EGF_RESPONSE_120_HELA	C2_curated	67	0.599286	2.29532	6.95317e-08	4.04083e-06	2065	tags=34%, list=10%, signal=31%	CXCL8/CXCL1/HBEGF/SNAI1/F3/SOWAHC/CLCF1/CXCL2/DUSP4/IER5/PLAUR/CYP1B1/CDKN1A/SAT1/FOSL1/AREG/MAP2K3/BDNF/RUNX3/GADD45A/GEM/NAB2/MAFF
GSE10325_CD4_TCELL_VS_MYELOID_DN	C7_immunologic	193	0.433612	1.97663	7.21356e-08	4.18427e-06	1420	tags=22%, list=7%, signal=21%	IRF8/ADM/MARCKS/VENTX/KYNU/SLC15A3/ICAM1/TESC/TRIB1/AQP9/HCK/RGS2/RAB31/BCL6/CLEC7A/PLAUR/CYP1B1/NFKBIE/TUBB6/LY86/CDKN1A/ITGAX/FGR/SAT1/CYBB/SERPINF1/FCGR2A/CCR1/IFI30/DYSF/MAP2K3/BASP1/RNASE6/MSR1/CSF1R/LILRB3/HSPA6/SLC2A6/CEBPB/PLEKHO1/COL9A2/TLR7
GO_POSITIVE_REGULATION_OF_MYELOID_LEUKOCYTE_DIFFERENTIATION	C5_GO	57	0.625746	2.32595	7.37895e-08	4.27218e-06	2800	tags=33%, list=13%, signal=29%	ROR2/TNF/LIF/CSF1/TESC/TRIB1/IL23A/TNFSF11/TYROBP/IL34/LEF1/PRKCA/CCR1/ID2/TGFB1/ZFP36L1/KITLG/IL17A/DCSTAMP
GO_REGULATION_OF_LEUKOCYTE_CHEMOTAXIS	C5_GO	119	0.506266	2.14959	7.40713e-08	4.28046e-06	3295	tags=36%, list=15%, signal=31%	CCL3/CXCL8/CCL5/CXCL10/THBS1/CSF1/CCL4/IL23A/IL6/CCL2/SERPINE1/CCR7/XCL1/IL34/EDN3/VEGFA/C5AR1/CCR1/DYSF/FPR2/C3AR1/CSF1R/PGF/EDN1/DDT/PRSS56/CCL19/STAP1/CALR/AKIRIN1/PLA2G7/SLIT2/MIF/C1QBP/IL4/DAPK2/RARRES2/WNT5A/CAMK1D/CXCL17/LGALS9/GPR18/CXCL13
GO_T_CELL_PROLIFERATION	C5_GO	189	0.442662	2.01158	7.46922e-08	4.30827e-06	2573	tags=24%, list=12%, signal=22%	CD276/TNFRSF4/TNFSF9/CLECL1/CCL5/IL2RA/HLA-G/CD70/IL23A/IL6/IL12RB1/SDC4/CD28/CD3E/FOXJ1/XCL1/ZAP70/LRRC32/CD6/HAVCR2/ANXA1/CRTAM/SHH/TNFRSF13C/RIPK2/PELI1/CORO1A/ICOSLG/PLA2G2F/EBI3/IRF1/CEBPB/TNFRSF1B/HES1/IGF1/CLC/VTCN1/CCL19/TNFSF8/WNT4/LGALS3/TMIGD2/ELF4/IL10/LILRB1/IL4
AMIT_EGF_RESPONSE_60_HELA	C2_curated	44	0.664834	2.34684	7.61663e-08	4.3851e-06	2159	tags=45%, list=10%, signal=41%	LIF/PMAIP1/FOXC1/SERPINE1/LDLR/NR4A3/SLC2A3/CCND1/VEGFA/BHLHE40/RHOB/GPRC5A/KLF6/TNFAIP2/KCNJ12/RUNX3/HES1/TIPARP/FOSL2/ZFP36L1
REACTOME_CLASS_C_3_METABOTROPIC_GLUTAMATE_PHEROMONE_RECEPTORS_	C2_curated	39	-0.707634	-2.3801	7.92111e-08	4.55191e-06	1852	tags=38%, list=9%, signal=35%	TAS1R3/TAS2R30/TAS2R46/TAS2R3/TAS2R10/TAS2R19/TAS2R43/TAS2R4/TAS2R5/TAS2R13/TAS2R31/TAS2R20/TAS2R50/TAS2R14/GABBR1
GSE44649_WT_VS_MIR155_KO_ACTIVATED_CD8_TCELL_UP	C7_immunologic	194	0.435165	1.98577	8.03081e-08	4.60637e-06	3357	tags=28%, list=15%, signal=24%	TNFSF9/CCL5/DUSP2/TNFRSF9/IL1RN/IL4I1/CD83/RELB/IRF4/LDLR/SOCS1/PLCD3/LGALS3BP/RND1/METRNL/JDP2/SSUH2/SLAMF1/IFFO2/PRDM1/BASP1/GBP7/CSRNP1/CDC42EP3/STXBP6/EBI3/IRF1/IFIT3/TLCD1/PTGER4/TAP1/HTR7/REL/IRGM/SLC4A11/NFIL3/GYPC/RGS1/TMCC3/CLIC4/SNN/PLA2G4F/BCL2L11/ATF4/ITM2C/FABP5/ZBTB10/FAS/SBDS/PLEKHG2/HELZ2/CACNA1S/SAMSN1/DPP3
REACTOME_G_ALPHA_S_SIGNALLING_EVENTS	C2_curated	508	0.33528	1.69578	8.42963e-08	4.82616e-06	9376	tags=64%, list=43%, signal=37%	ADM/RTP5/PDE3B/GNG4/PDE1A/GPR84/PDE4A/GPBAR1/GHRHR/PTHLH/ADRB1/PDE10A/RAMP1/PDE7B/GLP2R/DRD5/PTH1R/OR2H1/OR7D2/GPHA2/OR51S1/INSL3/OR6V1/PTGDR/ADM2/OR1E2/ADCYAP1/PTGER4/CALCB/HTR7/OR2A2/RTP2/LHB/PDE4D/OR8S1/GCG/HTR6/RAMP2/OR13G1/GPR150/OR52N1/OR52E8/OR13A1/OR5B2/OR4D6/OR5T2/OR10W1/GNG5/OR51G2/GNAI1/CALCR/OR7A5/OR6C70/OR2AE1/PDE11A/OR5B17/OR11H6/OR52I2/OR51T1/DRD1/GPR176/OR2A5/GNG11/OR9A4/OR7G1/CRH…
GSE7348_UNSTIM_VS_LPS_STIM_MACROPHAGE_DN	C7_immunologic	166	0.454029	2.03235	8.61211e-08	4.9215e-06	2791	tags=31%, list=13%, signal=28%	CXCL1/CSF1/CCL4/MARCKS/ICAM1/STX11/CD83/RELB/HCAR2/ATF3/CD69/SOCS1/ISG15/MAP3K8/TNFAIP3/IL34/PCDH7/PTGS2/CXCL11/ADGRF1/RGL1/GBP5/RIPK2/PELI1/MARCKSL1/RAB11FIP1/TNFAIP2/ICOSLG/BIRC3/SLC2A6/IRF1/EDN1/NFKBIB/SOCS3/FRMPD4/PTTG1/ABTB2/AHR/TRAF1/REL/SHC2/NFKB1/IFITM5/STAP1/BTG2/PIM1/OSGIN2/MAPKAPK2/CALCR/KCNG3/RASGEF1B/FAS
GOLDRATH_NAIVE_VS_EFF_CD8_TCELL_DN	C7_immunologic	195	0.439638	2.01353	8.92648e-08	5.09172e-06	3483	tags=28%, list=16%, signal=23%	IRF8/PRF1/LGALS1/CCL4/TNFRSF9/JCHAIN/S100A10/IRF4/PDCD1/IGKC/BCL2A1/PLP2/MT2A/ANXA1/CD48/PLIN2/ITGAX/FCER1G/BHLHE40/F2RL3/IFI30/PRDM1/CD99/EMP3/KLRG1/ELL2/MYADM/ACOT7/EFHD2/PCLAF/ANXA2/PLK4/GEM/ROM1/TPI1/NEK2/DTL/ADAM8/GZMB/LGALS3/MT1E/TYMS/PGAM1/MAPK6/C3/ODC1/TXN/CDC25C/EMP1/MYO1F/KIF11/GCAT/NCAPH/CDC45
WANG_RESPONSE_TO_GSK3_INHIBITOR_SB216763_DN	C2_curated	342	0.375122	1.82382	9.28891e-08	5.27976e-06	6162	tags=37%, list=28%, signal=27%	TNF/WT1/WT1-AS/PHLDA1/PDGFA/LGALS12/ETV4/ECE1/IL1RAP/PLXNA1/LDLR/ARL4C/SLC2A3/TNFAIP3/F2RL3/CCR1/SCD/LY6E/DHCR24/MYBL2/ITGB5/EZR/SLC7A5/NLRP3/CDC42EP3/TEX30/CCNE1/EIF5AL1/PIM2/PTTG1/SLC27A2/PLK4/UBALD2/PSMC3IP/SDF2L1/DTL/PIM1/TIPARP/TIMP3/HERPUD1/ORC6/UHRF1/PIGW/HSPE1/TUBA4A/CENPU/ETV5/CDC25A/TYMS/MIF/HMGCS1/MOB3A/MASTL/TLR2/NCF1/FABP5/PDK1/HSP90AA1/HSPA1B/DBN1/CENPH/ACAT2/TIPIN/EBP/DHCR7/PTPRE/C…
GO_REGULATION_OF_MACROPHAGE_DIFFERENTIATION	C5_GO	21	0.797605	2.36577	9.29058e-08	5.27976e-06	1981	tags=43%, list=9%, signal=39%	ROR2/INHBA/LIF/CSF1/TRIB1/IL34/PRKCA/ID2/TGFB1
WP_PHOTODYNAMIC_THERAPYINDUCED_NFKB_SURVIVAL_SIGNALING	C2_curated	35	0.715809	2.39093	9.30746e-08	5.27976e-06	1813	tags=46%, list=8%, signal=42%	TNF/CXCL8/ICAM1/MMP9/RELB/IL6/CXCL2/BCL2A1/CCND1/PTGS2/CSF2/VEGFA/NFKB2/BIRC3/REL/NFKB1
GSE28726_NAIVE_CD4_TCELL_VS_NAIVE_NKTCELL_UP	C7_immunologic	197	0.435586	1.99816	9.37003e-08	5.3055e-06	2897	tags=23%, list=13%, signal=20%	STX1A/DUSP5/CCL4/IER3/TUBB2A/IL1RAP/IRF4/PDCD1/ATF3/EGR2/BCL2A1/PLP2/SERPINB2/RRAS2/CD48/GBP1/ZFR2/EGR3/CD3D/SPRY1/MAP2K3/RARA/SLC7A5/NECTIN3/RHOG/FSCN1/ICOS/HOMER1/AHR/TRAF1/CLIC1/NFKB1/VIM/RGS10/MTHFD2/S100A11/ZYX/ATP2B1/GNG5/GNAI1/EIF4G2/PGAM1/VASP/GAPDH/PSMB5/PSMD7
GSE18791_CTRL_VS_NEWCASTLE_VIRUS_DC_12H_DN	C7_immunologic	185	0.439092	1.99447	9.50108e-08	5.36985e-06	2560	tags=24%, list=12%, signal=21%	TNF/CXCL1/GAL3ST2/DUSP5/PMAIP1/IL6/CREB5/PLEKHG5/SEMA6A/NEDD9/OSR2/ISG15/MAP3K8/GBP5/ST7-AS1/KCNJ2/ETV7/PELI1/CXCL9/CSRNP1/MAK/CDC42EP3/IRF1/IFIT3/HOMER1/ABTB2/TAP1/ARL5B/IFIT2/IL18RAP/EPSTI1/PAG1/RARG/SLC31A2/TMCC3/DNAJB4/TMEM217/IRF7/PDE4B/NEXN/ZBP1/CSRP2/CMPK2/MASTL
GSE21546_WT_VS_ELK1_KO_ANTI_CD3_STIM_DP_THYMOCYTES_UP	C7_immunologic	193	0.431035	1.96488	9.56212e-08	5.39447e-06	3931	tags=32%, list=18%, signal=27%	DUSP8/HBG2/ZNF703/DUSP2/TUBB2A/HSPA2/GADD45B/CYP24A1/BCL6/LEF1/JUNB/FGF21/ASB15/TOX2/RDH10/CYP11B2/AREG/MARCKSL1/NFKBID/GTSF1/CSRNP1/CSTA/PGF/SRD5A2/TAT/NR4A1/ARL4D/TLR9/TNFRSF25/MAP1LC3B/ARL5B/GEM/TAGLN3/FIBCD1/PIM1/MARVELD3/HSPE1/NRAS/TRPV6/FOXN1/PLPPR1/CALR3/DIO1/LSAMP/PHOSPHO1/TMEM200A/IRX3/CTSW/LINC01160/TSTA3/CCDC71L/MLLT11/CCDC124/IRX5/ADGRB2/SRF/ANAPC15/FGD6/DUOXA1/EGR1/RYR2/RALYL
IL2_UP.V1_UP	C6_oncogenic	178	0.451311	2.04287	9.79962e-08	5.51837e-06	2468	tags=33%, list=11%, signal=29%	TNFRSF4/CXCL3/LIF/DUSP2/TNFRSF9/TNFRSF12A/SPP1/TRIB1/STX11/PDE4A/DUSP4/EGR2/CD69/SOCS1/GADD45B/SLC2A3/TNFSF11/ZBTB32/TMEM158/JUNB/CCR4/SPRY2/KCNK5/FOSL1/EGR3/SLAMF1/RHOB/PAK6/RAB11FIP1/KLF6/PTH1R/IRS1/SLC7A5/DHRS3/RGCC/VSNL1/TNFRSF1B/PIM2/ABTB2/AHR/FLT3LG/LMO3/IL18RAP/SIGLEC9/LILRB4/PIM1/MAFF/FOSL2/GFAP/TEX13A/PRKCD/CDC25A/USH2A/RSPH6A/OSM/PRR7/IL10/SH2D4A
GSE46468_LUNG_INNATE_LYMPHOID_CELL_VS_SPLEEN_CD4_TCELL_UP	C7_immunologic	181	-0.462429	-2.03466	9.89321e-08	5.56092e-06	6067	tags=49%, list=28%, signal=36%	ASAH1/TCF19/LIX1L/AP1G2/METTL23/MAP2K5/GPALPP1/KDM3B/TGIF1/FBXO9/TMEM129/CHST14/GPD1L/SLC7A6OS/FOXJ2/RPS6KA1/OSBPL7/SIGIRR/INPP5D/KIAA1143/SKA2/PNISR/NPRL3/ZNF276/UVSSA/NIN/BBS1/EXOC1/SAP30L/KIAA0319L/SPIN4/HEATR5B/DCAF17/MON2/TRERF1/ZNF500/CLOCK/CLYBL/OPN3/KIAA0586/CHD9/NR1D2/PURA/GTF2IRD2/HINFP/VPS36/FGD3/MAP2K6/IRAK4/VIPAS39/ANXA4/TMEM19/CMC1/PCBD2/RFX7/PPP1R12B/ZNF33A/ZNF518A/SDHAF4/DHFR2/MAP…
RUTELLA_RESPONSE_TO_HGF_VS_CSF2RB_AND_IL4_UP	C2_curated	401	0.357981	1.7784	1.0066e-07	5.64776e-06	2846	tags=22%, list=13%, signal=19%	CCL3/CXCL1/CXCL3/CXCL10/NRIP3/HBEGF/TMEM51/KYNU/TREM1/SPP1/MMP9/RAB20/SH3BP5/NKG7/FCN1/S100A9/SGK1/AQP9/CCL2/SDC2/SERPINE1/GADD45G/S100A12/MT2A/NEDD9/BHLHE41/SLC2A3/CCND1/CYP1B1/CRTAM/CD48/LY86/APOE/PLIN2/RGL1/STAT1/PPIF/MAFB/CYBB/C5AR1/APOC1/CHI3L1/CCR1/SCD/FCAR/FPR1/CXCL9/C3AR1/SLC16A6/DHCR24/NQO1/NLRP3/ETS2/FDX1/SLC12A8/RGCC/MT1H/IFI6/CFD/FCGR1A/MT1G/IFITM2/TNFAIP6/VMP1/SLC3A2/C1S/DDIT4/LILRB4…
GSE22601_IMMATURE_CD4_SINGLE_POSITIVE_VS_CD8_SINGLE_POSITIVE_THYMOCYTE_DN	C7_immunologic	194	0.433308	1.9773	1.01648e-07	5.69286e-06	3310	tags=30%, list=15%, signal=26%	LIF/CSF1/ASB2/STX11/CEBPD/LTA/SGK1/AQP9/SOCS1/LGALS3BP/HLX/RRAS2/KBTBD8/MAP3K8/TBX21/CDKN2D/STAT1/SEMA7A/BHLHE40/PRDM1/PPP1R16B/CSRNP1/BIRC3/ZFP36/RUNX3/CEBPB/FURIN/TNFRSF1B/PTGER4/AHR/TNFRSF25/MIDN/GEM/ABI3/IRGM/FFAR2/NFIL3/TIPARP/FOSL2/GZMB/P2RY14/IRF7/MAPKAPK2/OSM/BCL2L11/ZBP1/IL12RB2/MAPK6/CD82/HIF1A/FAS/ODC1/CYTIP/NABP1/EMP1/MXD1/SAMSN1/ZNF281
PID_IL23_PATHWAY	C2_curated	37	0.70018	2.37966	1.03923e-07	5.80973e-06	2554	tags=46%, list=12%, signal=41%	TNF/CXCL1/IL23A/IL6/IL12RB1/CCL2/MPO/CD3E/NFKBIA/STAT1/CXCL9/SOCS3/IL18RAP/NFKB1/ITGA3/PIK3R1/IL17A
GSE35825_UNTREATED_VS_IFNG_STIM_MACROPHAGE_UP	C7_immunologic	196	0.431751	1.97754	1.05012e-07	5.85997e-06	2783	tags=27%, list=13%, signal=23%	ADM/TNFSF9/DUSP5/HBEGF/IL1RN/CD70/STX11/BCL3/CD83/GPR183/RELB/HCAR2/BCL2A1/NR4A3/CHAC1/SERPINB2/NFKBIA/MAP3K8/FILIP1L/NFKBIE/TUBB6/CDKN1A/PTGS2/STAT1/SEMA7A/CYBB/GCH1/CHI3L1/BCL2L14/BIRC3/EBI3/SLC2A6/NKX1-2/IFIT3/ID2/RNF19B/HP/TPI1/STAP1/GRHL1/TIMP3/CLIC4/OSGIN2/HLA-B/IRF7/HMGCS1/CSF3/RHOF/C3/RASGEF1B/HSPA1B/NOCT
GSE3982_CTRL_VS_LPS_4H_MAC_DN	C7_immunologic	197	0.434595	1.99361	1.05898e-07	5.8888e-06	2806	tags=27%, list=13%, signal=24%	IRF8/CCL5/HCAR3/CCNA1/IL1RN/IL10RA/PMAIP1/CYP1A1/OASL/IL23A/CEBPD/ZC3H12A/TRAF4/IFITM1/GADD45B/TNFAIP3/CD48/TUBB6/CCR4/SLC7A10/STAT1/SLAMF1/CD99/KLF6/BASP1/NDST3/EZR/NFKB2/GPR132/RUNX3/LRP12/IRF1/NECTIN2/TLR7/HOXC6/TRAF1/REL/IFIT2/KCNA1/MTHFD2/TIPARP/CLIC4/MAFF/ELF4/PDE4B/ISG20/EIF1B/SLC1A2/HIF1A/USP18/FAS/CMA1/TICAM1
CHEMNITZ_RESPONSE_TO_PROSTAGLANDIN_E2_DN	C2_curated	369	-0.379796	-1.82604	1.0591e-07	5.8888e-06	3248	tags=28%, list=15%, signal=24%	RBL2/RSPH3/MSI2/LYPLAL1/TMEM245/CXADR/PIK3C3/KIF1B/GK5/SAMD13/NBL1/AGO3/SIK2/PIGV/MRI1/PROM1/MINDY2/GLB1L/ITGB8/MMP15/CARF/CLDN12/MACC1/AKAP5/CD200/NSUN7/P4HTM/MITF/ST14/WSCD1/CYB561D2/SLC2A9/LMO7/BCL11A/SIRT5/ZSCAN31/TCAIM/SH3D19/PPFIBP1/SPATS2L/SLC2A13/BBS2/BCAR1/RPS6KA2/HOXA10-AS/KAZN/ZBTB20/TINAGL1/ILDR1/NAALADL2/SLC24A1/VWA5A/SCHIP1/ZNF599/PCLO/MED11/CCL28/LIME1/EPS8L1/PLS1/NAPEPLD/LRRK2/PTP…
HALLMARK_IL6_JAK_STAT3_SIGNALING	Hallmark	84	0.557362	2.21062	1.07463e-07	5.96439e-06	1999	tags=32%, list=9%, signal=29%	TNF/CXCL1/CXCL3/CXCL10/CSF1/IL2RA/TNFRSF12A/IL6/IL12RB1/LTB/SOCS1/IL2RG/MAP3K8/CXCL11/CSF2/STAT1/CCR1/HMOX1/CXCL9/EBI3/IRF1/SOCS3/TNFRSF1B/PLA2G2A/IL15RA/TGFB1/PIM1
MURARO_PANCREAS_MESENCHYMAL_STROMAL_CELL	C8_cellSignature	657	0.313922	1.61898	1.10178e-07	6.10411e-06	3236	tags=25%, list=15%, signal=22%	CD276/LGALS1/INHBA/LIF/PTPN14/DUSP5/THBS1/HBEGF/EPS8/SPRY4/PHLDA1/HIC1/IL11/MARCKS/TNFRSF12A/HAS2/G0S2/GAS7/TFPI2/SNAI1/ADGRA2/IER3/MMP9/HTRA3/COL6A2/COL1A2/PLAU/IL6/CD248/GFPT2/CNN3/SDC2/SERPINE1/ARL4C/S1PR3/IFITM1/MT2A/LRRC32/SLC2A3/RAB31/TIMP1/COL6A1/MRC2/PLAUR/CYP1B1/ZCCHC24/ANXA1/TUBB6/TMEM158/PLIN2/PTGS2/CRISPLD2/LMNA/BHLHE40/SERPINF1/CYGB/PRDM1/MARCKSL1/ABCA1/SPON1/BASP1/SH3PXD2B/LAMA2/LTB…
MIR548AA_MIR548AP_3P_MIR548T_3P	C3_motif	536	-0.341863	-1.69196	1.11137e-07	6.14618e-06	3858	tags=25%, list=18%, signal=21%	ZNF512/RFX3/MYEF2/MAP10/BMP1/SERP2/JADE2/LSM11/SMOC1/RCOR3/USP46/TMEM131/DISC1/TMEM170B/FAM104B/PARP11/SLC16A7/ERMP1/CLOCK/ARHGAP28/PSD3/ATP2B4/TMEM106B/RPS6KA6/KIAA0586/ZMYND11/SCAI/TTC28/FAM124B/BRWD1/AP1AR/REEP3/LCLAT1/PRKACB/MACF1/KIF1B/ANGEL2/PER3/TNRC6B/CREB1/SGO2/SAMD13/ATP6V0A2/MAST4/PAPOLG/NEK1/MFSD14B/FAM160A1/TMX3/GEMIN5/DDX17/CARF/SOHLH2/ZDHHC21/INPP4A/GLIPR1/DCUN1D4/UBR2/LTN1/COG6/PP…
GSE10325_BCELL_VS_MYELOID_DN	C7_immunologic	196	0.430979	1.974	1.1279e-07	6.22648e-06	3613	tags=33%, list=17%, signal=28%	ADM/HBEGF/IL1RN/VENTX/GAS7/ICAM1/TESC/OASL/SERPINA1/CEBPD/AQP9/APOBEC3A/RGS2/CLEC7A/PLAUR/CYP1B1/CRISPLD2/MAFB/SAT1/C5AR1/FCGR2A/CCR1/CAMK1/HMOX1/FPR1/C3AR1/TNFRSF10C/TNFAIP2/GNA15/CSF1R/LILRB3/CSTA/NLRP3/LILRA1/SH2B3/ADGRE3/CEBPB/LST1/COTL1/TNFRSF1B/CFD/NCF2/SLC31A2/MYCL/MICAL2/LGALS3/PRKCD/PGAM1/TLR2/RPH3A/ACTG1/CDKN1C/C15orf39/CD93/PTPRE/SLC7A7/HSBP1/RAB32/MYO1F/TKT/CEBPA/NOD2/AIF1/LILRA2/FCGR…
MIR506_3P	C3_motif	733	-0.320966	-1.62457	1.14729e-07	6.32219e-06	3595	tags=22%, list=17%, signal=19%	NFATC2/HTATIP2/ERMP1/SLC33A1/CLOCK/ARHGAP28/PPP1R13L/PRKAG2/ATF7IP/FKBP15/CPNE3/ULK2/GPAM/KIF26B/ANKRD44/MBOAT2/TMBIM1/NFIX/SHANK2/HIVEP2/ABCC4/PALLD/SUMF1/E2F5/LCLAT1/CXADR/TMEM87B/POGLUT1/RAI14/RASSF8/AKT3/TNRC6B/ATL3/ENDOD1/IPO8/ATP6V0A2/GTF2A1/KIF3A/EVI5/PAPOLG/ZNF608/ORC2/KLLN/IQGAP2/CD164/SH3PXD2A/ATF7/TARBP1/ZSCAN22/CNTN1/LDLRAP1/FBXO38/SNX16/ZFP36L2/LRRC1/PPARA/JAKMIP3/FAM120C/CHIC1/CDON/…
GSE3982_MEMORY_CD4_TCELL_VS_BCELL_UP	C7_immunologic	191	0.429013	1.95612	1.15763e-07	6.36778e-06	821	tags=16%, list=4%, signal=15%	RPS4Y1/KDM5D/CD96/PHLDA1/DDX3Y/SH2D1A/IL10RA/USP9Y/IL2RB/CD28/TRAT1/CD3E/DUSP4/DOK2/IFITM1/ZAP70/CD6/NINJ1/NEUROG2/MRC2/CYP1B1/ANXA1/LCK/UPP1/GATA3/GBP1/EDN3/ADGRE5/UBASH3A/CD3D
GSE43863_LY6C_INT_CXCR5POS_VS_LY6C_LOW_CXCR5NEG_EFFECTOR_CD4_TCELL_DN	C7_immunologic	197	0.433651	1.98928	1.17008e-07	6.42484e-06	2855	tags=30%, list=13%, signal=27%	GNG4/ARC/HIC1/TMEM51/SLC15A3/SPP1/F3/TUBB2A/RAB20/ATF3/FAM178B/DUSP4/EGR2/PACSIN1/S1PR3/XCL1/CHRNA3/MIR22HG/NR4A3/TBX21/LCK/SH2D2A/TNFRSF13C/TMEM74B/PIM3/GPR65/TOX2/PRKCA/SAT1/TSSK6/SPRY1/IER2/CNTNAP4/SULT2B1/CSRNP1/CST7/RND2/LGI1/EPHB3/NDFIP2/PTGER4/PLK3/AHR/C15orf48/SLC3A2/IL15RA/CCNO/NAB2/TGFB1/GRHL1/CMTM2/TIPARP/NGEF/SLC35B1/TMEFF1/HSPA5/RBPMS2/HLA-A/CMTM6/UBASH3B
RUTELLA_RESPONSE_TO_HGF_UP	C2_curated	411	0.352292	1.75271	1.2289e-07	6.7358e-06	2129	tags=19%, list=10%, signal=18%	CCL3/TNFRSF4/CXCL1/CXCL3/INHBA/CXCL10/NRIP3/DUSP5/PLPP1/MARCKS/TMEM51/KYNU/SPP1/MMP9/RAB20/IL21R/IRF4/NKG7/PLXNA1/SDC4/SGK1/AQP9/CCL2/SDC2/SERPINE1/GADD45G/LDLR/CCR7/MT2A/NR4A3/BHLHE41/CCND1/CYP1B1/FILIP1L/CRTAM/APOE/RGL1/STAT1/PPIF/RAMP1/CYBB/SERPINF1/APOC1/CHI3L1/CCR1/SCD/SLAMF1/CXCL9/C3AR1/SLC16A6/DHCR24/NQO1/BIRC3/EBI3/CD1B/NECTIN2/FDX1/SLC12A8/MT1H/FSCN1/ANXA2/IFI6/FCGR1A/MT1G/TRAF1/TNFAIP6/…
GSE29618_BCELL_VS_MONOCYTE_DAY7_FLU_VACCINE_DN	C7_immunologic	196	0.429809	1.96864	1.26191e-07	6.90448e-06	3535	tags=32%, list=16%, signal=27%	HCAR3/HBEGF/IL1RN/GAS7/ICAM1/TREM1/FBN2/TRIB1/STX11/RAB20/CEBPD/CREB5/SGK1/ATF3/S100A12/MIR22HG/TYROBP/PLAUR/UPP1/SULT1A2/CRISPLD2/LMNA/MAFB/VEGFA/BHLHE40/C5AR1/CCR1/CD68/HMOX1/FPR1/GNA15/CSF1R/LILRB3/NLRP3/CDC42EP3/EFHD2/LST1/RGCC/TNFRSF1B/AHNAK/ID2/NFIL3/SIGLEC9/SLC31A2/VIM/RGS10/ZYX/SLC30A1/MICAL2/CD63/ALDOA/RNASE2/ENO1/SIRPB1/HSBP1/RAB32/MYO1F/TKT/NAMPT/GABARAPL1/CEBPA/ZNF467/LILRA2
ONO_AML1_TARGETS_DN	C2_curated	41	0.672764	2.34186	1.26691e-07	6.91959e-06	2933	tags=41%, list=13%, signal=36%	TNFRSF18/CCL5/CXCR3/IRF4/SLFN12L/CCR7/ADGRE5/RUNX3/SOCS3/TNFRSF25/FFAR2/TNFSF8/CCR8/IL10/IL17A/IL4/ITGAE
GSE33374_CD8_ALPHAALPHA_VS_ALPHABETA_CD161_HIGH_TCELL_DN	C7_immunologic	196	0.429295	1.96629	1.28424e-07	7.00185e-06	3365	tags=29%, list=15%, signal=24%	TNFRSF18/PRF1/CCL5/CXCL10/TCF7/CD28/SOAT2/CD3E/DOK2/ISG15/TNFSF11/BCL6/NFKBIA/LCK/SH2D2A/CD5/PITPNM1/NMB/RAMP1/PELI1/IER2/ACTN2/KLRG1/CD27/PARP8/CTSV/CCR9/RHOG/IFIT3/PTGER4/TRAF1/GLIPR2/PGLYRP1/TAP1/VMP1/SLC3A2/ITGB2/IFIT2/ROM1/IL18RAP/BOP1/MTHFD2/MAPKAPK2/CD82/ITM2C/KLK8/HLA-A/PSMD9/FAS/ACAT2/SEPHS2/NABP1/PHPT1/HPN/RFLNB/PPP4C
GO_HORMONE_ACTIVITY	C5_GO	118	0.500323	2.12138	1.30123e-07	7.07402e-06	3855	tags=40%, list=18%, signal=33%	ADM/INHBA/NPPC/RETN/TRH/PTHLH/METRNL/GAL/NMB/EDN3/APELA/GHRL/ANGPTL8/VGF/GPHA2/INSL3/EDN1/ADM2/ADCYAP1/FNDC5/IGF1/NTS/CALCB/LHB/GCG/CCK/CARTPT/ASIP/CCL25/UCN2/GAST/CRH/GH2/TSHB/UCN3/GUCA2A/PNOC/NPPB/PTH/INSL4/PYY/IGF2/STC1/PMCH/ADIPOQ/GHRH/UTS2B
chrYq11	C1_positional	21	0.79397	2.35499	1.30206e-07	7.07402e-06	2046	tags=52%, list=9%, signal=47%	EIF1AY/TTTY14/KDM5D/TMSB4Y/UTY/DDX3Y/USP9Y/RPS4Y2/NLGN4Y/TTTY13/TTTY10
MIR3133	C3_motif	498	-0.348906	-1.71611	1.34749e-07	7.30795e-06	4752	tags=33%, list=22%, signal=26%	PHC3/RC3H2/RBBP5/TRAPPC8/DACH1/AVL9/ARFGEF1/SLC2A14/CSRNP2/LUC7L3/ZBTB41/ZNF148/ASAH2B/SNTG1/CPEB3/JAG2/BIVM/ATAD1/PHIP/ERCC6L2/IKZF2/GOLGA4/KMT5B/FCHSD2/TBL1XR1/TIA1/FSD1L/RGPD5/TRDMT1/RGPD4/TMTC1/MAP7/RNF182/CTSO/SORT1/SOX11/PIK3CD/SLC36A4/MEX3A/OTUD7B/C12orf29/VAPB/DHX32/ADGRL3/JADE2/CBLB/RCOR3/ASPH/PKD2/CADM1/TMEM170B/ZNF680/MON2/RAB10/CASD1/PCGF5/LRP6/ARMC2/PSD3/ATP2B4/ATF7IP/RPS6KA6/SYNPO2/…
BIOCARTA_NKT_PATHWAY	C2_curated	26	0.754588	2.36351	1.35481e-07	7.33474e-06	2573	tags=46%, list=12%, signal=41%	CCL3/CCL4/CXCR3/IL12RB1/CD28/CCR7/CCR4/CSF2/CCR1/TGFB1/IL12RB2/IL4
ZNF8_TARGET_GENES	C3_motif	894	-0.304197	-1.57282	1.37798e-07	7.44713e-06	4570	tags=29%, list=21%, signal=23%	CARD8-AS1/YBX3/DRAIC/ESF1/ERVK3-1/ALG10/NFIC/BRWD3/NRSN2/LINC00486/EXOC1/MYO19/CDKN2C/SMIM8/CCNB3/TCF12/ENPP3/CCDC130/FKBP7/LINC01535/ITGA7/GTPBP3/CKAP2/AASDHPPT/ZNF609/MVB12A/PAXBP1/ITGB3BP/NEAT1/TMEM18/MLEC/ST3GAL1/NR1H3/ANXA2R/LONP2/BAZ2B/WDR36/KNTC1/ANKRD54/SCAMP1/NEMP2/DUSP22/MITD1/TAOK3/GGPS1/PRPF3/MSRB2/GATAD1/HCG9/ZNF264/CEP72/DDX55/PWWP2A/MAPK14/ZNF227/HIKESHI/ZNF490/C12orf45/DISC1/CNTLN…
GSE13946_CTRL_VS_DSS_COLITIS_GD_TCELL_FROM_COLON_UP	C7_immunologic	171	0.447872	1.99974	1.42626e-07	7.69457e-06	4064	tags=32%, list=19%, signal=26%	PRF1/DUSP5/PHLDA1/CCL4/CXCR3/PMAIP1/NKG7/S100A9/CD28/S100A8/GADD45B/FAM107B/RGS2/BAG3/ANXA1/TBX21/ITGAX/PRDM1/GNA15/NCALD/MRPS24/ELL2/MYADM/CST7/ACOT7/AHNAK/PTTG1/GEM/SDF2L1/IL18RAP/NFIL3/RGS1/S100A11/ZYX/CHCHD2/IL12RB2/HIF1A/CEACAM3/COX8A/ODC1/TXNDC17/EMP1/MYO1F/GABARAPL1/CYSLTR2/DDX28/GGH/AIF1/P2RY10/SPTY2D1/GZMM/COQ10B/NDUFS6/FTH1/CD38
GSE17721_CTRL_VS_LPS_1H_BMDC_DN	C7_immunologic	193	0.428645	1.95399	1.44984e-07	7.80812e-06	3702	tags=33%, list=17%, signal=28%	PTX3/INHBA/GSTM1/DUSP2/ICAM1/UPB1/IER3/OASL/SOWAHC/IL23A/WNT10B/ATF3/ZC3H12A/BHLHE41/SERPINB2/MAP3K8/MRC2/CDKN1A/RIPK2/F2RL3/CCR1/FPR1/IER2/TNFAIP2/FBLN5/ZFP36/PGF/EBI3/SIX1/B3GAT1/CEMIP/ID2/NR4A1/PTGER4/PIWIL1/DSCAM/FLT3LG/EPHA3/HCN2/B3GNT2/ASB16/TRPC7/MEOX1/TIPARP/DNAJB4/MAFF/RND3/MICAL2/SAA4/HSPA5/COL12A1/TNP1/LUZP1/CCDC71L/NABP1/CLVS1/CR2/NRBF2/NFE2L2/PHOX2A/EHD1/KCNJ9/TOR2A/IFNB1
GSE7460_FOXP3_MUT_VS_WT_ACT_TCONV_UP	C7_immunologic	197	0.431949	1.98147	1.45981e-07	7.84813e-06	2573	tags=25%, list=12%, signal=22%	TNFRSF4/TNFRSF18/UTY/LGALS1/DUSP5/ASB2/HIC1/DDX3Y/MARCKS/SPP1/STX11/RAB20/SLC30A2/PDCD1/IL12RB1/PTPN3/SOAT2/BCL2A1/DOK2/MIR22HG/C12orf75/SH2D2A/PLIN2/TOX2/JDP2/PRDM1/MAP2K3/BASP1/PDE6G/ELL2/EBI3/CST7/CEBPB/ICOS/ZCCHC18/AHR/RNF19B/VMP1/GEM/LPXN/RGS1/TMEM132A/FUOM/LGALS3/SPA17/IL10/CD8A/UBXN2A/IL4
GO_POSITIVE_REGULATION_OF_T_CELL_PROLIFERATION	C5_GO	98	0.527147	2.16917	1.46701e-07	7.87311e-06	1903	tags=27%, list=9%, signal=24%	CD276/TNFSF9/CLECL1/CCL5/IL2RA/CD70/IL23A/IL6/IL12RB1/CD28/CD3E/XCL1/ZAP70/CD6/HAVCR2/ANXA1/SHH/TNFRSF13C/RIPK2/CORO1A/ICOSLG/EBI3/HES1/IGF1/VTCN1/CCL19
GSE1925_CTRL_VS_3H_IFNG_STIM_MACROPHAGE_UP	C7_immunologic	192	0.433199	1.97214	1.48825e-07	7.97324e-06	3407	tags=25%, list=16%, signal=21%	TNFRSF4/DUSP2/ECE1/RELB/IRF4/PDCD1/LTA/CCL2/PACSIN1/BCL2A1/CD6/TNFSF11/TYROBP/ANXA1/CRTAM/LEF1/SH2D2A/CD5/DPYSL3/IER2/NFKB2/PARP8/SOX4/FURIN/TNFRSF1B/NR4A1/ITM2A/PARM1/BOP1/NAB2/CD320/LGALS3/MAPKAPK2/BCL2L11/DIO1/CD82/HEPH/NME1/CNN2/KLK8/ODC1/SRM/SLC7A7/SLC25A25/YBX1/MRPL36/LCP1/TFB2M
GO_ALPHA_BETA_T_CELL_ACTIVATION	C5_GO	145	0.465388	2.02747	1.49805e-07	8.01182e-06	2813	tags=31%, list=13%, signal=27%	TCF7/BCL3/CD83/GPR183/IL23A/RELB/IRF4/IL6/IL12RB1/CD28/ZC3H12A/CD3E/XCL1/SOCS1/ZAP70/BCL6/HLX/ANXA1/TBX21/CRTAM/LEF1/SHH/RIPK2/GATA3/PRDM1/ZNF683/RARA/NFKBID/NLRP3/EBI3/RUNX3/IRF1/CD160/PTGER4/CCL19/TNFSF8/SMAD7/ELF4/TOX/PRR7/LILRB1/IL4/ITK/HLA-A/RHOA
KOBAYASHI_EGFR_SIGNALING_6HR_DN	C2_curated	17	0.840109	2.34664	1.52844e-07	8.1502e-06	750	tags=59%, list=3%, signal=57%	DUSP5/PHLDA2/IL11/G0S2/F3/IER3/DUSP4/CCND1/VEGFA/FOSL1
GSE40225_WT_VS_RIP_B7X_DIABETIC_MOUSE_PANCREATIC_CD8_TCELL_UP	C7_immunologic	185	-0.456934	-2.02409	1.5292e-07	8.1502e-06	4476	tags=39%, list=21%, signal=31%	USP44/NUMA1/CCDC130/RBM6/ZNF557/KMT5B/EXOC2/FCHSD2/ST3GAL1/FMNL3/SMG1/SAYSD1/ST3GAL3/VPS13C/JADE2/SLA/ZNF880/ADAM28/NUDCD3/EPG5/SGSM3/SP140L/ANKRD44/TRAK2/SORL1/SHPRH/MACF1/PDE8A/ZNF619/DENND4C/SNX27/PTGS1/DZIP3/SESN3/SENP7/TANGO6/THADA/KHDRBS2/TSPAN33/TTC13/CHIC1/CDKL1/LRRC56/BACH2/AMPD3/POLM/SEMA4F/ZNF600/GSAP/TTC21A/ZNF678/TAPT1-AS1/ABCC5/RASA1/SLC6A16/EFCAB13/ZNF28/BMP2K/RABGAP1/SERPINB9P1/WD…
KUROZUMI_RESPONSE_TO_ONCOCYTIC_VIRUS_AND_CYCLIC_RGD	C2_curated	20	0.815669	2.40569	1.57555e-07	8.38274e-06	2425	tags=65%, list=11%, signal=58%	IL10RA/IL2RB/LTA/BCL6/CCR4/CXCL11/IL36RN/CCR1/CXCL9/CCR9/CCL22/CCR8/IL10
GO_REGULATION_OF_PROTEIN_SERINE_THREONINE_KINASE_ACTIVITY	C5_GO	501	0.333484	1.68462	1.67161e-07	8.87852e-06	4444	tags=28%, list=20%, signal=22%	ROR2/TNF/DUSP8/CXCL10/DUSP5/THBS1/SPRY4/PDGFA/DUSP2/CCNA1/TRIB1/LAX1/FZD8/PROK2/GADD45G/DUSP4/S100A12/ADRA2B/NTRK1/GADD45B/TENM1/RGS2/TNFSF11/EPHA4/CCND1/DUSP10/MAP3K8/TNFAIP3/IL34/APOE/CDKN1A/CDKN2D/IRAK2/SESN2/SERTAD1/RIPK2/SPRY2/EDN3/VEGFA/TRIB2/C5AR1/SFN/CAMK1/FPR1/SPRY1/GHRL/NOX4/MAP2K3/CDKN2B/CSF1R/NGF/PDE6G/BIRC7/PDGFB/IGFBP6/GADD45A/UBC/S1PR2/EDN1/SH2B3/SPRED3/CEMIP/IQGAP1/CCNE1/RGCC/PRKA…
ZNF597_TARGET_GENES	C3_motif	708	0.305456	1.58636	1.70857e-07	9.05923e-06	1915	tags=15%, list=9%, signal=14%	TNF/RRAD/LGALS1/CCL5/B3GNT7/ASTL/BCL6B/DUSP2/TCF7/TNFRSF9/NTN1/IL4I1/STAR/CD70/ITGB7/MMP9/STX11/RAB20/CD83/ECE1/RELB/PLAU/WNT1/PDE4A/SNHG9/ZC3H12A/SYTL3/CCR7/KREMEN2/TRAF4/JPH4/DOK2/CD69/LRRC32/NINJ1/NTRK1/ACHE/RND1/FAM167A/NFKBIA/TNFAIP3/CYP1B1/CD48/LY86/LINC00964/MYEOV/LINC01629/STAT1/AP1S3/IGFLR1/SEMA7A/LMNA/CYP51A1-AS1/BHLHE40/LINC00877/FOSL1/CCR1/WNT10A/LINC01353/MIR497HG/MAP2K3/RARA/NFKBID/…
GO_REGULATION_OF_TRANSFERASE_ACTIVITY	C5_GO	981	0.284427	1.50741	1.71356e-07	9.07013e-06	4242	tags=24%, list=20%, signal=20%	ROR2/TNF/DUSP8/CCL5/CXCL10/DUSP5/THBS1/HBEGF/SPRY4/CSF1/PDGFA/DUSP2/CCNA1/ROR1/TESC/TRIB1/LAX1/IL23A/SH3BP5/LILRA5/FZD8/SDC4/PROK2/GADD45G/CCR7/DUSP4/S100A12/ADRA2B/TRAF4/CHRNA3/SOCS1/NEDD9/NTRK1/GADD45B/TENM1/RGS2/TNFSF11/EPHA4/CCND1/DUSP10/MAP3K8/ERBB3/TNFAIP3/EFNA5/IL34/APOE/CDKN1A/CDKN2D/IRAK2/SESN2/TTN/SERTAD1/RIPK2/FGR/WNT11/SPRY2/LDB2/EDN3/VEGFA/TRIB2/PTPRH/EEF1A2/C5AR1/CHI3L1/AZU1/AREG/GP…
GSE17301_CTRL_VS_48H_ACD3_ACD28_STIM_CD8_TCELL_DN	C7_immunologic	198	0.424989	1.9489	1.74214e-07	9.2056e-06	3796	tags=31%, list=17%, signal=26%	TNF/TNFSF9/CXCL3/CCL5/GPR84/ICAM1/STX11/RAB20/RELB/CHSY3/ZC3H12A/IL2RG/HCK/NFKBIA/MAP3K8/TNFAIP3/NFKBIE/ANXA1/JUNB/ZMYND15/MARCKSL1/FPR1/FPR2/TNFAIP2/GNA15/PSMA8/EBI3/CCDC103/PIM2/PTGER4/SYN1/PFKFB3/RNF19B/NFKB1/SLC31A2/TGFB1/PLA2G7/ITGAM/EDAR/CHCHD2/PDE4B/MIF/ALAS1/ACOD1/TLR2/VASP/C3/HSPA1B/TLL1/TMEM208/GPR18/MRPL52/RAD23B/SQLE/CAV1/GTPBP4/TNIP1/EHD1/SPI1/EXOC3L4/ZNF385A
GO_CHEMOKINE_ACTIVITY	C5_GO	48	0.643552	2.30615	1.74609e-07	9.21071e-06	3839	tags=50%, list=18%, signal=41%	CCL3/CXCL8/CXCL1/CXCL3/CCL5/CXCL10/CCL4/CXCL2/CCL2/XCL1/CXCL11/CXCL9/CCL3L3/CCL3L1/CCL22/CCL19/CCL25/CCL18/CKLF/CCL15/CXCL13/CXCL16/CCL1/XCL2
GABRIELY_MIR21_TARGETS	C2_curated	283	-0.394664	-1.83294	1.74954e-07	9.21313e-06	5162	tags=42%, list=24%, signal=32%	ZMYM2/RALGPS2/PHF20L1/SCRN1/SRSF11/GTF2I/NIPBL/DCAF10/LATS1/LIN7C/UBR5/SLC9A6/SLC5A3/SREK1/EXOC5/TRIM59/SPIN1/UTRN/ARFGEF1/LPIN1/MYCBP2/USP34/DLG1/DDR2/CPEB3/RAB6C/PHIP/TAF1/GOLGA4/FBXO3/SACM1L/TBL1XR1/PAN3/THOC2/LCORL/TRPM7/MSH2/ZNF532/TTC33/UBR3/ARMCX3/PIK3C2A/REV3L/ZBTB44/MYEF2/SKP2/PKD2/PTAR1/CLOCK/ATP2B4/MYO9A/GPAM/KBTBD7/PM20D2/LNPK/VPS54/POLR3B/LYRM7/CLIP4/PALLD/PURA/RAB3GAP2/PER3/RAI14/VP…
TONKS_TARGETS_OF_RUNX1_RUNX1T1_FUSION_MONOCYTE_DN	C2_curated	55	0.615711	2.26955	1.78474e-07	9.3825e-06	2453	tags=38%, list=11%, signal=34%	HBG1/HDC/ITGB7/IRF4/LTB/PDE4A/SDC2/ARL4C/RGS2/CYP1B1/HBA1/CD1B/CD1A/CLC/S100B/BTG2/CD1E/ADAM8/ADAMDEC1/P2RY14/CD1C
BOSCO_TH1_CYTOTOXIC_MODULE	C2_curated	112	0.507067	2.14705	1.80878e-07	9.49273e-06	2876	tags=34%, list=13%, signal=30%	PRF1/CXCL10/IL2RA/SH2D1A/IL4I1/CD300E/IRF4/NKG7/SSTR2/P2RX5/CD28/TRAT1/SOCS1/ISG15/CXCL11/CD5/RGL1/PRKCA/STRIP2/SLAMF1/CXCL9/BCL2L14/CH25H/RUNX3/PLEKHO1/CEMIP/CRABP1/HAPLN3/IL15RA/GZMB/TYMS/IL10/IL12RB2/ACOD1/CMPK2/USP18/RNASE2/OR2A5
GSE14000_UNSTIM_VS_4H_LPS_DC_TRANSLATED_RNA_DN	C7_immunologic	190	0.439393	2.0014	1.93605e-07	1.01434e-05	3573	tags=33%, list=16%, signal=28%	IGLON5/CCL5/DUSP5/CCL4/PMAIP1/F3/OASL/STX11/ATF3/CTXN1/BCL2A1/IFITM1/APOBEC3A/NR4A3/ISG15/DNAAF1/CD48/CXCL11/GBP5/IRAK2/TMEM74B/STAT1/LY6K/GBP1/GBP2/GCH1/ETV7/BCL2L14/DACT3/LILRB3/BIRC3/IRF1/FERMT2/IFIT3/SOCS3/PTGER4/FNDC5/HOMER1/TRAF1/TNFAIP6/IFIT2/IL15RA/EPSTI1/SLC31A2/MTHFD2/GRHL1/IRF7/ELF4/OSM/ISG20/CSRP2/CMPK2/MASTL/CKAP4/USP18/HOXB1/MX1/UBE2L6/NAMPT/CCKAR/TNIP2/CD80/POM121L12
ZHENG_CORD_BLOOD_C2_PUTATIVE_BASOPHIL_EOSINOPHIL_MAST_CELL_PROGENITOR	C8_cellSignature	94	0.52471	2.13295	1.96281e-07	1.02661e-05	6035	tags=59%, list=28%, signal=42%	LGALS1/HDC/TPSAB1/P2RX5/FAM178B/NEDD9/ANXA1/AFF2/PLIN2/LMNA/HPGDS/TRIB2/RAB11FIP1/EMP3/MS4A3/CNRIP1/SOX4/PIM2/IFITM2/SDF2L1/VIM/ALOX5AP/CALR/TMSB10/HMGCS1/CD63/ATF4/HSPA5/CD82/VASP/P4HB/TES/SPTY2D1/FLNA/PDIA3/ING2/GDE1/TFRC/FBXO33/GLUL/PTMA/JUND/TFR2/LMO4/PPP1R15A/SLC25A3/HSP90AB1/S100A4/S100A6/PLGRKT/SLC2A1/CHPT1/GTF3C4/GATA1/SLC6A6
SANA_TNF_SIGNALING_UP	C2_curated	82	0.545005	2.16216	1.9696e-07	1.02843e-05	3208	tags=38%, list=15%, signal=32%	CXCL8/CXCL3/INHBA/CXCL10/CSF1/SLC15A3/ICAM1/CXCL2/CCL2/SERPINE1/LGALS3BP/NFKBIA/TNFAIP3/CXCL11/RIPK2/GBP1/SAT1/RHOB/TNFAIP2/ICOSLG/BIRC3/C1S/CTHRC1/HLA-B/SAMHD1/CMPK2/TLR2/HLA-A/PLA1A/LGALS9/MX1
WP_ADIPOGENESIS	C2_curated	130	0.482025	2.06978	2.00521e-07	1.04525e-05	4590	tags=43%, list=21%, signal=34%	TNF/LIF/RETN/IL6/CEBPD/WNT10B/WNT1/SERPINE1/SFRP4/EGR2/SOCS1/DLK1/TWIST1/GADD45B/CDKN1A/PLIN2/STAT1/LMNA/GATA3/SCD/KLF6/RARA/BMP3/IRS1/E2F1/GADD45A/CEBPB/SOCS3/CFD/IGF1/AHR/WNT5B/HMGA1/LIFR/DDIT3/TGFB1/ASIP/OSM/MIF/HIF1A/FAS/CYP26B1/FOXC2/GDF10/NAMPT/CEBPA/GTF3A/ADIPOQ/FRZB/CNTFR/TRIB3/SREBF1/KLF15/ID3/PTGIS/MEF2A
GSE19401_UNSTIM_VS_RETINOIC_ACID_STIM_FOLLICULAR_DC_DN	C7_immunologic	183	0.43929	1.9902	2.07065e-07	1.07754e-05	2904	tags=28%, list=13%, signal=24%	TNF/CCL3/TNFRSF4/CXCL1/CCL5/THBS1/CCL4/IL10RA/G0S2/CD83/RELB/SDC4/ATF3/SERPINE1/GADD45G/ARL4C/MT2A/MIR22HG/HCK/NFKBIA/TNFAIP3/JUNB/CXCL11/GBP1/MARCKSL1/TNFAIP2/ICOSLG/NQO1/NFKB2/SLC7A5/FSCN1/C11orf72/ITM2A/PTPRT/TRAF1/HMGA1/GEM/LMO3/IL15RA/NFKB1/GYPC/MTSS1/DNAJB5/NRAS/SLC18A3/LSM1/FABP5/PSMA1/SHMT2/HLA-DOB/RBP1
BLANCO_MELO_HUMAN_PARAINFLUENZA_VIRUS_3_INFECTION_A594_CELLS_UP	C2_curated	194	0.427571	1.95112	2.15588e-07	1.12e-05	1892	tags=23%, list=9%, signal=21%	CCL3/PTX3/CXCL10/DUSP5/HCAR3/PHLDA1/CCL4/IL4I1/SLC15A3/PMAIP1/OASL/IL6/HCAR2/CREB5/ATF3/IFITM1/RGS2/EPHA4/PLAUR/TNFAIP3/CXCL11/GBP5/ULBP2/STAT1/GBP1/ETV7/CD68/KLF6/CH25H/BIRC3/NT5E/IRF1/IFIT3/ATP4A/MYPN/NCF2/PTGER4/TRAF1/TNFAIP6/TAP1/IFIT2/IL15RA/C1S/EPSTI1/LIFR
ZHENG_CORD_BLOOD_C9_GRANULOCYTE_MACROPHAGE_PROGENITOR	C8_cellSignature	93	0.533074	2.16446	2.19232e-07	1.13702e-05	5377	tags=54%, list=25%, signal=41%	IRF8/CP/LGALS1/S100A10/MPO/ANXA1/PIM3/SAT1/AZU1/CD99/VIM/GYPC/CALR/RTN4/TAGLN2/CFL1/TPM4/IGLL1/ATP2B1/HLA-B/C1QTNF4/TMSB10/PIK3R1/ITM2C/HSP90AA1/HLA-A/ACTG1/GAPDH/ENO1/PFN1/RAB32/LYZ/LCP1/TPM3/SMIM24/CALM1/HSP90B1/B2M/HDGF/LPAR6/TUBA1B/PTMA/STMN1/PA2G4/RBM17/SET/C9orf78/HMGN2/ANP32B/PEBP1
NFKB_Q6_01	C3_motif	231	0.407462	1.89727	2.20103e-07	1.13962e-05	1992	tags=21%, list=9%, signal=19%	MSC/GNG4/CCL5/BCL6B/IL2RA/TNFRSF9/IL1RN/NTN1/IL4I1/ICAM1/CD70/MMP9/BCL3/IL23A/RELB/LTA/LTB/TRAF4/CD69/PHOX2B/PTHLH/GADD45B/RND1/IER5/NFKBIA/TRIB2/BMF/WNT10A/CEND1/NFKBID/SMPD3/NFKB2/BDNF/BIRC3/ELMSAN1/EBI3/S1PR2/SH2B3/RASGRP4/NFKBIB/RHOG/TNFRSF1B/EIF5A/RAP2C/ARL5B/TMEM88/HIVEP1/MSX1/PPP1R13B
JISON_SICKLE_CELL_DISEASE_UP	C2_curated	178	0.443805	2.0089	2.21167e-07	1.14322e-05	3535	tags=32%, list=16%, signal=27%	ADM/CXCL10/KYNU/OASL/TUBB2A/NGFR/IGF2BP3/ATF3/MPO/GADD45B/SLC2A3/TIMP1/NFKBIE/CDKN1A/RGL1/STAT1/GBP1/GBP2/AZU1/IFI30/HMOX1/EMP3/LY6E/HBA1/ITGB5/AXL/GADD45A/IFIT3/ANXA2/ST3GAL5/FCGR1A/CALCOCO2/CLIC1/TAP1/IFIT2/CALR/DDIT3/CLIC4/SNN/SLC22A4/GNG5/TP53I11/GTF2B/HLA-A/RNASE2/YWHAH/GNG11/PSMB2/TXN/TYMP/P4HB/MX1/UBE2L6/RIT1/GAS2L1/SQLE/LILRA2
MIR205_3P	C3_motif	396	-0.363539	-1.75834	2.22788e-07	1.14967e-05	4585	tags=30%, list=21%, signal=24%	ZBTB41/YBX3/RAB27B/PARL/MEIOC/ALG10/ANKIB1/TNKS/SPAG16/SEMA3C/TDRKH/MCTP2/HDAC9/PRELID2/UBE2V1/SMG1/DUSP22/TTC33/CREBZF/NRXN1/ECM2/ATP8A1/RFX3/PDE1C/ZBTB44/NKIRAS1/SEL1L/METTL8/CLK2/TMEM170B/RAB10/CASD1/ERMP1/CCSER1/MECP2/FGL2/MAP3K4/ABCC4/MSI2/BRWD1/CCSER2/TMEM245/CXADR/RAB3GAP2/TNRC6B/CREB1/ATRX/PLA2G6/B4GALT6/F5/POT1/PAPOLG/CMC1/ATRN/MINDY2/ITGB8/SESN3/MBTPS2/C5/ROCK2/MMP16/GDPD1/APAF1/GCLM/MG…
WP_TYPE_II_INTERFERON_SIGNALING_IFNG	C2_curated	36	0.681904	2.29199	2.23573e-07	1.15179e-05	2210	tags=47%, list=10%, signal=42%	IRF8/CXCL10/ICAM1/IRF4/SOCS1/ISG15/STAT1/GBP1/CYBB/CXCL9/IRF1/SOCS3/IFI6/TAP1/IFIT2/PRKCD/HLA-B
MIR10393_5P	C3_motif	143	-0.486297	-2.07361	2.25617e-07	1.16039e-05	3001	tags=29%, list=14%, signal=25%	ZNF189/ZNF514/ADAMTS3/ARRDC2/ZNF347/UNKL/RAB39B/ZNF544/ARL13B/ZNF37A/ZNF117/ZNF813/ZNF302/ZNF816/RGS20/SLF2/ZNF322/ZNF568/GPR180/ZFP90/ZNF28/LRIF1/ZNF382/UCP3/ZNF711/GIPC2/ZNF780B/CEP126/ZNF229/JAM2/ZNF233/COL4A1/DNTT/ZNF594/SLC40A1/GIN1/NBEA/TBC1D9/ANOS1/ZNF781/ZNF208/BEND7
MIR548E_5P	C3_motif	727	-0.319024	-1.61392	2.28138e-07	1.1714e-05	4055	tags=28%, list=19%, signal=23%	PID1/LEPR/RAB6C/ZSCAN2/RIMKLB/PHIP/WDR75/SAMD9L/TAF1/CCDC18/PPARGC1B/HDAC9/TBL1XR1/NSD1/ANXA2R/UBE2V1/ZNF436/KIF17/TMTC1/UHRF2/HERC3/TXLNG/MBD5/N4BP2L1/SLC36A4/UBE3C/PIK3C2A/MEX3A/VPS13C/RFX3/KIAA1109/TMEM65/ATXN3/KALRN/ARHGAP5/LSM11/SKP2/TMEM131/ZNF200/DPP4/CLK2/SYNJ1/PPFIA1/PARP11/CLOCK/POLR1B/CLASP2/MICAL3/ATF7IP/TMEM106B/SLC35B4/NAPB/MECP2/DCP2/ADAM12/PTPRG/ALG10B/SAMD4A/LNPK/CASP8AP2/TTC28/R…
GO_BLOOD_VESSEL_MORPHOGENESIS	C5_GO	583	0.320276	1.6404	2.32335e-07	1.19097e-05	3315	tags=24%, list=15%, signal=21%	TNF/ADM/PDE3B/CXCL8/WT1/CXCL10/THBS1/NFATC4/PDGFA/TNFRSF12A/HAS2/CXCR3/ADGRA2/HLA-G/FOXC1/F3/NGFR/IL6/FZD8/PROK2/CCL2/HOXA1/SERPINE1/LDLR/ZC3H12A/SEMA6A/HPGD/PLCD3/MMP19/TWIST1/STRA6/TNFAIP3/CYP1B1/ANXA1/LEF1/APOE/JUNB/SH2D2A/PTGS2/SHH/STAT1/KLF2/ITGAX/WNT11/SPRY2/PRKCA/SAT1/VEGFA/RAMP1/CYBB/SERPINF1/C5AR1/CHI3L1/EGR3/MCAM/PLK2/RHOB/S1PR1/PRDM1/HMOX1/PPP1R16B/APELA/DYSF/GHRL/ADTRP/C3AR1/TNFAIP2/F…
RYAN_MANTLE_CELL_LYMPHOMA_NOTCH_DIRECT_UP	C2_curated	147	0.467088	2.04228	2.33698e-07	1.19597e-05	2288	tags=30%, list=11%, signal=27%	TNF/IRF8/DUSP2/IL10RA/ICAM1/IL21R/P2RX5/CD28/TRAF4/BCL2A1/NEDD9/GADD45B/FAM167A/CNR2/LY86/HES4/SEMA7A/FGR/RHOV/PELI1/S1PR1/ADTRP/CHI3L2/MYBL2/NRARP/ZFP36/CD27/RUNX3/IFIT3/MPEG1/TNFRSF1B/HES1/ID2/NR4A1/SFTPB/SPIB/FCRL3/UBALD2/HIVEP1/ZFP36L1/SNN/PTP4A3/CDC25A/TNFRSF13B
KAMIKUBO_MYELOID_CEBPA_NETWORK	C2_curated	29	0.731551	2.33327	2.35563e-07	1.20352e-05	3468	tags=59%, list=16%, signal=49%	IRF8/LGALS1/HDC/S100A9/CD177/S100A8/RAB31/PRTN3/ANXA1/CYBB/FPR2/DGAT2/HP/ITGAM/LCN2/LYZ/CEBPA
DACOSTA_UV_RESPONSE_VIA_ERCC3_COMMON_DN	C2_curated	451	-0.358448	-1.74507	2.38021e-07	1.21407e-05	6203	tags=45%, list=29%, signal=33%	MBNL1/ATP11B/NCOA1/BBX/MAP2K4/FOXO3/CREBBP/ZNF292/XPO1/R3HDM2/NVL/HELZ/NRG1/TUBGCP3/UPF2/ARHGAP12/SRGAP2/CENPF/PUM3/CDC27/XRCC4/TGFB2/CKAP5/TOP2A/SLC4A7/PAWR/CDK13/STARD13/GINS1/SRSF7/COL5A2/SPECC1L/MAN2A1/BLM/ASCC3/MAP4K5/ATF2/SRPK2/MKLN1/ANKRD17/STAG1/CLEC16A/DUSP1/RUNX1/PUM2/CCDC93/ZMYM2/AGAP1/RNF13/STRN3/CTBP2/UBR5/ARID5B/PHLPP2/FAM171A1/PHF21A/PNISR/PEX3/RPGR/LARP4/TRAPPC8/ARFGEF1/FUT8/MARK3…
AP1_Q4	C3_motif	269	0.387214	1.84236	2.42586e-07	1.23531e-05	2425	tags=22%, list=11%, signal=20%	XIRP1/GPR3/NRIP3/TCF7/IL1RN/TNFRSF12A/PLEKHH3/TRIB1/MMP9/IL23A/S100A10/MDFI/IL6/FAM178B/KCNH2/MMP19/KBTBD8/S100A5/CDKN1A/AK5/LMNA/PTPRH/EEF1A2/PAK6/SFN/PRDM1/RELL2/CCDC50/SLC16A6/IGFBP6/EDN1/AXIN2/DUSP13/PTPRN/PIM2/CYTOR/FAM180A/ABI3/TEX19/ZIC1/CLC/SLC4A11/ROM1/FHL3/CCL22/PDE4D/VIM/LIFR/LRRC15/SHC3/RTN4/GPR150/TAGLN2/NRAS/ETV5/ISG20/GNAI1/UCN2/IL10
MIR944	C3_motif	419	-0.35845	-1.7352	2.43146e-07	1.23612e-05	4244	tags=31%, list=20%, signal=26%	IKZF2/MCTP2/CCDC58/PLA2G12A/PAN3/HS3ST3B1/FSD1L/PRDM10/SEPSECS/MAP7/CFAP97/ARID1B/EBAG9/PIK3C2A/MEX3A/VPS13C/MYEF2/ZNF264/KIAA1109/TMEM65/NCOA2/CBLB/ANKRD20A4/SLC35A3/RAPGEF2/PRKCH/PCGF5/CLOCK/SLC41A2/TMEM106B/SPOCK3/ST8SIA4/SPOP/MMS22L/CHD9/FGL2/PPM1E/SLC35A5/PLPPR5/BRCA1/MAGEF1/PRKACB/FAM135A/ESR2/STAM2/CREB1/OTOA/MPP7/NFS1/NHEJ1/FBN1/ZMYM6/GTF2A1/RGS14/PCBD2/TMEM68/TMEM135/TMX3/PMS1/MACC1/ARL1…
GO_POSITIVE_REGULATION_OF_LYMPHOCYTE_MEDIATED_IMMUNITY	C5_GO	102	0.503683	2.08175	2.45278e-07	1.24491e-05	2757	tags=31%, list=13%, signal=28%	TNF/SH2D1A/HLA-G/CLCF1/IL23A/IL6/NCR3/LTA/IL12RB1/CD28/XCL1/TBX21/CRTAM/GATA3/FCER1G/SLC22A13/NLRP3/CD1B/CD160/NECTIN2/FCER2/CD1A/IL18RAP/TGFB1/CD1E/HLA-B/KIR2DL4/CD1C/IL4/SH2D1B/C3/HLA-A
DAUER_STAT3_TARGETS_UP	C2_curated	47	0.648616	2.30907	2.4685e-07	1.24993e-05	1597	tags=38%, list=7%, signal=36%	ADM/DUSP5/THBS1/ICAM1/TRIB1/BCL3/CEBPD/CCL2/GFPT2/ATF3/LDLR/SLC2A3/BCL6/FOSL1/ABCA1/ZFP36/SOCS3/PFKFB3
MODULE_165	C4_computational	79	0.56348	2.2389	2.47077e-07	1.24993e-05	3695	tags=44%, list=17%, signal=37%	IRF8/CXCL10/ITGB7/NKG7/FCN1/MPO/BCL2A1/NINJ1/HCK/PRTN3/PLIN2/S100P/PTGS2/CLEC2B/FXYD2/C5AR1/RBM38/CXCL9/HSPA6/CD27/ETS2/NCF2/HMGCS2/CCL19/PLA2G7/ITGAM/MNDA/CEACAM5/DBN1/MLLT11/RHOH/LILRA2/FABP1/RRM2/SPI1
GO_LYMPHOCYTE_MIGRATION	C5_GO	115	0.492828	2.08411	2.48088e-07	1.25299e-05	3839	tags=33%, list=18%, signal=27%	CCL3/CCL5/CXCL10/CCL4/CXCR3/ICAM1/ITGB7/GPR183/CCL2/CCR7/XCL1/ZAP70/TBX21/CRTAM/CXCL11/GATA3/S1PR1/CD99/CH25H/ADTRP/CCL3L3/CCL3L1/XG/CCL22/MYO1G/CCL19/ADAM8/CCL25/CCL18/RHOA/WNT5A/CKLF/CCL15/CXCL13/AIF1/CXCL16/CCL1/XCL2
GSE7460_FOXP3_MUT_VS_WT_ACT_WITH_TGFB_TCONV_UP	C7_immunologic	194	0.424983	1.93931	2.60892e-07	1.3155e-05	3486	tags=25%, list=16%, signal=21%	IRF8/KDM5D/HBG2/PDE3B/UTY/HIC1/DDX3Y/CXCR3/CD70/SLC30A2/IL2RB/PDCD1/NKG7/PTPN3/ATF3/BCL2A1/GADD45B/C12orf75/TBX21/PLIN2/STARD6/PRDM1/PPP1R16B/SULT2B1/KLRG1/ELL2/CEBPB/STRA8/PIM2/AHR/VMP1/SDF2L1/CARD10/LGALS3/CATSPERD/IL10/IL12RB2/CD8A/ATF4/IL4/SLC39A4/HSPA1B/TSPAN4/EPHB6/SEC61B/GABARAPL1/RAD23B/ARID5A/CDYL2
LEI_MYB_TARGETS	C2_curated	313	0.371269	1.78928	2.61989e-07	1.31888e-05	3237	tags=25%, list=15%, signal=22%	PTX3/RRAD/CXCL8/IL1RN/TUBB2A/COL1A2/S100A10/AGR2/IL6/S100A9/CCL2/SERPINE1/IFITM1/NINJ1/S100A8/PTHLH/LGALS3BP/ISG15/SLC2A3/RGS2/SERPINB2/CCND1/CYP1B1/ANXA1/TMEM158/CDKN1A/S100P/CRYAB/SOX15/GATA3/SAT1/BHLHE40/EEF1A2/PLK2/SFN/HMOX1/LY6E/BASP1/GRIP2/SLC7A5/AXL/HSPA6/DHRS3/UBC/SH2B3/CEBPB/PCLAF/ANXA2/PTTG1/IFITM2/KRT15/TMEM47/TNFAIP6/MAP1LC3B/COL6A3/VIM/PTGDS/TIMP3/CLIC4/HSPE1/TUBA4A/ISG20/ALAS1/CLDN3…
GO_INFLAMMATORY_RESPONSE_TO_ANTIGENIC_STIMULUS	C5_GO	56	0.604195	2.2355	2.65855e-07	1.33616e-05	3025	tags=36%, list=14%, signal=31%	TNF/IL2RA/IL1RN/ICAM1/LTA/CD28/CCR7/IL5RA/CD6/IL36RN/GATA3/FCER1G/CD68/IL25/ADCYAP1/OPRM1/IL10/C3/PSMA1/HMGB2
GO_POSITIVE_REGULATION_OF_CELL_DEVELOPMENT	C5_GO	545	0.324003	1.65665	2.67877e-07	1.34413e-05	2813	tags=21%, list=13%, signal=19%	ROR2/TNF/CCL3/LIF/FOXA1/CSF1/FEZ1/NTN1/TNFRSF12A/HAS2/ROR1/STAR/TRIB1/CLCF1/NGFR/S100A10/NEUROG3/IL6/PLXNA1/LTA/S100A9/DLX2/SEMA6A/ADRA2B/EGR2/PACSIN1/PHOX2B/NEDD9/NTRK1/GPER1/RGS2/TNFSF11/BCL6/CLEC7A/HAP1/TYROBP/EPHA4/EFNA5/IL34/APOE/SHH/RNF157/ISLR2/SOX8/CNTF/DPYSL3/TRPC5/SEMA7A/VEGFA/SERPINF1/OLIG2/CAMK1/RELN/RARA/NGF/BDNF/OTP/RASAL1/MMD2/APOA1/MYOC/MYADM/E2F1/RND2/S1PR2/EDN1/CPNE6/IQGAP1/LMOD…
MIR20A_5P	C3_motif	656	-0.318682	-1.60112	2.68354e-07	1.34434e-05	3993	tags=27%, list=18%, signal=23%	OCRL/MAP7/ANO6/TAOK3/GAB1/UBE3C/REV3L/NTN4/ZNF264/MAP10/NKIRAS1/CC2D1A/PXYLP1/SMOC1/EFCAB14/USP46/FGD5/PKD2/PLAG1/ZFAND4/RAB10/SLC33A1/TANC1/CLOCK/RPS6KA6/PRR14L/OSBPL5/USP28/CRYBG3/KIF26B/SCN2A/ZNF652/CENPQ/PRDM6/BEST3/RBL2/FGL2/CLIP4/BRWD1/TIAM1/TAOK1/NAGK/FAM102A/SORL1/REEP3/E2F5/ZFPM2/SLC4A8/BAMBI/EZH1/GOLGA1/CNOT6/CREB1/ATL3/ABCD2/RBM12B/SLC46A3/TMEM25/TBC1D17/ANKFY1/ATG2B/MEX3D/UNKL/ITGB8/S…
GSE360_T_GONDII_VS_B_MALAYI_HIGH_DOSE_DC_UP	C7_immunologic	193	0.423089	1.92866	2.68811e-07	1.34444e-05	1915	tags=28%, list=9%, signal=26%	WT1-AS/COL4A5/DUSP5/MYRF/STX11/CD83/RELB/IGKC/CCR7/DUSP4/BCL2A1/NR4A3/GADD45B/NFKBIA/TNFAIP3/AFF2/ACTG2/GBP1/SAT1/GCH1/SSUH2/PLK2/CAMK2A/ASIC2/NPHS1/SYCP1/CXCL9/MS4A3/BASP1/FAM131B/TNFAIP2/NFKB2/E2F1/FERMT2/COL9A2/IFIT3/SOCS3/SYN1/ABTB2/CHST2/PTPRT/TRAF1/TAP1/KRTAP26-1/REL/TIE1/COL6A3/CDH15/IL15RA/CBARP/NRP2/TPI1/NFKB1/RGS1
GO_PEPTIDYL_TYROSINE_MODIFICATION	C5_GO	365	0.361677	1.77341	2.72618e-07	1.36128e-05	2627	tags=22%, list=12%, signal=20%	ROR2/TNF/TNFRSF18/LIF/CCL5/HBEGF/PDGFA/IL11/ROR1/ICAM1/CLCF1/IL23A/IL6/SH3BP5/LILRA5/CD3E/SOCS1/ZAP70/NEDD9/NTRK1/HCK/EPHA4/ERBB3/EFNA5/IL34/LCK/CSF2/TTN/CNTF/EFEMP1/RIPK2/FGR/STAP2/VEGFA/AREG/GPRC5A/RELN/GHRL/NOX4/MAP2K3/CSF1R/SRMS/BDNF/AXL/PDGFB/SH2B3/IQGAP1/CADM4/SOCS3/NTRK2/EPHB3/HES1/IL3/FGFR1/IGF1/FCGR1A/RAP2C/ITGB2/EGFR/TIE1/EPHA3/MET/DOK7/CBLC/STAP1/TGFB1/CCK/ERBB4/ROS1/PRKCD/OSM/MIF/NTF3…
FAN_EMBRYONIC_CTX_BRAIN_NAIVE_LIKE_T_CELL	C8_cellSignature	149	0.453627	1.98902	2.73576e-07	1.36386e-05	3512	tags=32%, list=16%, signal=27%	CD96/CD7/SH2D1A/TCF7/LTB/ARL4C/TRAT1/CCR7/CD3E/HPGD/CD69/IFITM1/ZAP70/CD6/IL2RG/FAM107B/TNFAIP3/ANXA1/LEF1/LCK/CD48/CD5/GBP2/CD3D/EMP3/CORO1A/CHI3L2/LSP1/CD27/RGCC/ICOS/PIM2/FLT3LG/TAGLN2/TUBA4A/HLA-B/ISG20/ITK/CNN2/HLA-A/TSC22D3/CD52/LAT/CYTIP/RHOH/CRIP1/TES/STK17B
GSE18791_CTRL_VS_NEWCASTLE_VIRUS_DC_4H_UP	C7_immunologic	192	-0.443139	-1.9805	2.79355e-07	1.39042e-05	5384	tags=47%, list=25%, signal=36%	RBL1/MYCBP/IPO11/COA4/PALB2/CDC23/RAD51C/FAM78A/NME6/TRUB1/TBL2/LARP4/MSTO1/TRMT10A/TNRC18/FAM216A/ZNF557/CMTM4/TRIM27/DHX33/TAF4/CRLS1/EDC3/MSH2/INTS8/MAP7/FOS/RPAP2/POP5/HEATR6/ALKBH2/LRMP/MRPS31/MGME1/FANCF/METTL3/PSMG4/NIFK-AS1/KBTBD7/SWSAP1/KIAA0586/FAHD1/TLR1/DEF8/STAM2/AGGF1/DDX23/RPP40/DZIP3/URB1/ZNF544/SUOX/FBXL4/WDR3/INPP4A/MBLAC2/C1orf109/TBCK/ERC2/MCEE/CD3EAP/ZNF302/POP1/TIMM21/FLI1/B…
HAY_BONE_MARROW_STROMAL	C8_cellSignature	736	0.304681	1.58262	2.8518e-07	1.41713e-05	3150	tags=28%, list=14%, signal=24%	ROR2/CD276/ADM/PTX3/CP/RRAD/CXCL3/PDE1A/EPS8/SPRY4/CSF1/NFATC4/PLPP1/MARCKS/TNFRSF12A/HAS2/GLIS2/FOXC1/COL6A2/NGFR/COL1A2/OLFML3/MDFI/IL6/SSTR2/CHSY3/FZD8/CXCL2/CCL2/RASL11A/CNN3/ATF3/RASD1/LDLR/TSKU/S1PR3/TEAD3/CHRNA3/MT2A/OSR2/MMP19/TWIST1/LGALS3BP/GADD45B/RND1/COL6A1/MRC2/CYP1B1/ZCCHC24/IL34/APOE/RGL1/SLC7A10/CRYAB/DPYSL3/EFEMP1/LY6K/LMNA/SERTAD1/EDIL3/CBLN2/NMB/LINC01426/SCUBE1/GPRC5A/TBX15/S…
WP_TNF_RELATED_WEAK_INDUCER_OF_APOPTOSIS_TWEAK_SIGNALING_PATHWAY	C2_curated	42	0.671271	2.35177	2.97429e-07	1.47562e-05	1813	tags=33%, list=8%, signal=31%	TNF/CCL5/TNFRSF12A/MMP9/RELB/IL6/CCL2/NFKBIA/NFKB2/BIRC3/NFKBIB/TRIM63/TRAF1/NFKB1
CUI_TCF21_TARGETS_2_DN	C2_curated	821	-0.305937	-1.56722	2.98558e-07	1.47885e-05	3996	tags=28%, list=18%, signal=24%	TMTC1/SLCO2A1/UBR3/CREBZF/ARMCX3/MBD5/NPR3/SLC36A4/EBAG9/TEX2/HEATR5B/ARNT/OTUD7B/NTN4/ZBTB44/PPP4R3B/ARHGEF16/ADGRL3/TMEM65/MAGI2/ARHGAP5/GIMAP4/BTAF1/CBLB/USP46/FGD5/DPP4/ADCY1/RAPGEF2/PRKCH/PTAR1/STK3/CCRL2/LNPEP/SLC33A1/TANC1/CLOCK/ARHGAP28/KBTBD11/PSD3/SLC12A6/TMEM106B/VAMP5/TGFBR3/OSBPL5/ULK2/RHPN1/SERINC5/PCMTD2/PTPRG/ST8SIA4/SPOP/SAMD4A/HECW2/TMBIM1/TRAK2/RIN2/VPS54/DNAJB6/HIVEP2/USP33/SL…
PID_AP1_PATHWAY	C2_curated	69	0.579575	2.23882	3.00489e-07	1.48602e-05	2757	tags=36%, list=13%, signal=32%	CXCL8/MMP9/COL1A2/PLAU/IL6/CCL2/ATF3/DMP1/MT2A/TIMP1/CCND1/JUNB/CSF2/FOSL1/EDN1/ACTA1/NTS/TGFB1/FOSL2/BCL2L11/IL10/CDKN2A/IL4/HIF1A/HLA-A
KAECH_NAIVE_VS_DAY8_EFF_CD8_TCELL_DN	C7_immunologic	194	0.423978	1.93473	3.01727e-07	1.48969e-05	5634	tags=41%, list=26%, signal=30%	PRF1/LGALS1/CCL5/SH2D1A/CXCR3/S100A10/BCL2A1/PLP2/SLC2A3/ANXA1/CD48/SH2D2A/ITGAX/BHLHE40/F2RL3/PRDM1/KLRG1/MNS1/CST7/ACOT7/CD160/EFHD2/ANXA2/TNFRSF1B/AHNAK/ID2/PTTG1/PGLYRP1/GEM/ROM1/IL18RAP/S100A11/CLIC4/ADAM8/GZMB/LGALS3/ACTB/TYMS/HLA-A/FAM89B/TXN/HMGB2/CDC25C/EMP1/NDUFB9/MYO1F/DBI/KIF11/KCTD9/PSMA2/PRELID1/CRIP1/NCAPH/GGH/RRM2/SRP14/CAPNS1/FRG1/BAG1/CDK2AP1/PRDX4/ETFB/PSMD8/STMN1/CKS1B/AK3/TBC…
MIR548AR_3P	C3_motif	559	-0.336827	-1.67701	3.02196e-07	1.48969e-05	4855	tags=33%, list=22%, signal=26%	PNISR/IKBIP/DTD2/ELK4/TRUB1/TNFSF13B/PHC3/FAM120A/TRAPPC8/LEPROT/SCML1/ZBTB14/DIDO1/C3orf70/TRMT10A/FNDC3A/ZBTB41/RAB27B/HCFC2/KLF9/ZNF148/BRWD3/LPP/TNRC18/RNF217/HACE1/ZNF569/ZNF260/SMAD4/ZFX/PHIP/IKZF2/TBL1XR1/GNS/TAF4/TRPM7/SPIN4/MAP7/MEX3B/N4BP2L1/PKNOX1/VPS13C/NTN4/ZBTB44/PPP4R3B/MYEF2/ZNF264/ATXN3/PXYLP1/POU4F1/ZFAND4/PCGF5/CLASP2/TGFBR3/CCSER1/CPNE3/MECP2/PIKFYVE/TRMT5/SERINC5/NHLRC2/GPAM/…
GSE15330_MEGAKARYOCYTE_ERYTHROID_VS_GRANULOCYTE_MONOCYTE_PROGENITOR_UP	C7_immunologic	175	0.438607	1.97666	3.087e-07	1.51932e-05	2064	tags=21%, list=10%, signal=19%	PRF1/TNFSF9/CCL5/DUSP5/PHLDA1/CCL4/CXCR3/PMAIP1/NKG7/S100A9/S100A8/ANXA1/TBX21/CD48/ITGAX/BHLHE40/PRDM1/CCDC50/IER2/GNA15/NCALD/CDC42EP3/MYADM/ACOT7/NFKBIB/AHNAK/ID2/NR4A1/PTTG1/MAP1LC3B/GEM/SDF2L1/IL18RAP/NFIL3/RGS1/S100A11/ZYX
AMIT_SERUM_RESPONSE_60_MCF10A	C2_curated	56	0.602408	2.22889	3.12644e-07	1.53629e-05	1518	tags=43%, list=7%, signal=40%	CXCL8/INHBA/DUSP5/HBEGF/PMAIP1/TRIB1/SGK1/ZC3H12A/MAP3K8/TNFAIP3/PTGS2/MAFB/C1orf116/BHLHE40/EGR3/SCD/PLK2/RHOB/IER2/ELL2/ETS2/SOX4/VGLL3/PTGER4
PID_P53_DOWNSTREAM_PATHWAY	C2_curated	136	0.467559	2.01003	3.17583e-07	1.55651e-05	1992	tags=23%, list=9%, signal=21%	LIF/DUSP5/FOXA1/HIC1/SH2D1A/PMAIP1/SPP1/ATF3/SERPINE1/BCL2A1/BCL6/CDKN1A/SFN/PRDM1/BCL2L14/SCN3B/TNFRSF10C/TNFRSF10D/E2F1/GADD45A/RGCC/PLK3/TAP1/EGFR/MET/TIGAR/TP53INP1/DDIT4/BTG2/BDKRB2/PPP1R13B
GO_POSITIVE_REGULATION_OF_MYELOID_CELL_DIFFERENTIATION	C5_GO	96	0.526343	2.15331	3.17769e-07	1.55651e-05	3251	tags=29%, list=15%, signal=25%	ROR2/TNF/INHBA/LIF/CSF1/TESC/TRIB1/IL23A/ISG15/TNFSF11/TYROBP/IL34/LEF1/STAT1/PRKCA/CCR1/ID2/TGFB1/ZFP36L1/KITLG/CSF3/IL17A/HIF1A/HSPA1B/DCSTAMP/HMGB2/POU4F2/ACVR1B
GO_POSITIVE_REGULATION_OF_ERK1_AND_ERK2_CASCADE	C5_GO	198	0.420233	1.92709	3.18926e-07	1.5597e-05	2437	tags=26%, list=11%, signal=24%	TNF/CCL3/CCL5/CCL4/PDGFA/ICAM1/GPR183/CCL2/GPBAR1/CCR7/XCL1/NTRK1/GPER1/TNFSF11/HAVCR2/APOE/FGF21/SEMA7A/RIPK2/SPRY2/PRKCA/C5AR1/CHI3L1/CCR1/SLAMF1/APELA/NOX4/FPR2/CCL3L3/CSF1R/CCL3L1/TNFAIP8L3/PDGFB/PLA2G2A/ADCYAP1/FFAR4/GLIPR2/EGFR/DDT/CCL22/CCL19/HCRTR1/GCG/TGFB1/OPRM1/ERBB4/FGG/MIF/CCL25/CALCR/ALKAL1/FGF19
GO_REGULATION_OF_LYMPHOCYTE_MEDIATED_IMMUNITY	C5_GO	150	0.459894	2.01726	3.23065e-07	1.57616e-05	2757	tags=28%, list=13%, signal=25%	TNF/CD96/SH2D1A/HLA-G/CLCF1/IL23A/IL6/NCR3/LTA/IL12RB1/CD28/FOXJ1/XCL1/BCL6/HAVCR2/TBX21/CRTAM/GATA3/FCER1G/SUSD4/SLC22A13/NLRP3/CD1B/CD160/NECTIN2/TNFRSF1B/FCER2/CD1A/CLC/IL18RAP/TGFB1/CD1E/SMAD7/HLA-B/KIR2DL4/IL10/CD1C/LILRB1/IL4/SH2D1B/C3/HLA-A
LAKE_ADULT_KIDNEY_C20_COLLECTING_DUCT_INTERCALATED_CELLS_TYPE_A_CORTEX	C8_cellSignature	144	-0.474195	-2.02337	3.23803e-07	1.57616e-05	3737	tags=34%, list=17%, signal=28%	NCOA2/AKAP9/RALGAPA1/RAPGEF2/STK3/PSD3/DPH6/ATP6V0D2/ABCC4/MSI2/SUMF1/SNTB1/PCNX4/ITPR1/SCAPER/DIP2C/ZSWIM6/PPP1R12B/SBF2/TBC1D4/ADGRF5/MTR/ITGA6/KIAA1328/ZBTB20/KIAA1217/RNF152/FGD4/ARL15/MYO10/TRIM2/ABCA5/ARHGEF28/THSD7A/PRKG1/PTPRJ/GPHN/MPPED2/GPAT3/KANSL1L/FREM1/MAGI3/KIF21A/LGR4/THRB/NR3C2/LIMCH1/MYO1D/XIST
MIR758_3P	C3_motif	123	-0.506591	-2.1172	3.23822e-07	1.57616e-05	2755	tags=27%, list=13%, signal=24%	FBN1/ZFHX3/PCBD2/SOCS7/GCSH/NHLRC3/CARF/HSD17B13/FLVCR1/EEA1/BACH2/C2CD2/TYRO3/ZNF226/ZNF385C/ZNF28/ZNF257/B3GNT9/ANKH/TRIP11/LRFN2/RAD52/SGIP1/LIN7A/ZDBF2/C3orf14/HRH4/RORA/PRRG1/CDC42BPA/WWC2/MIPOL1/ST6GAL2
HU_FETAL_RETINA_FIBROBLAST	C8_cellSignature	373	0.356429	1.7504	3.36521e-07	1.63538e-05	3150	tags=29%, list=14%, signal=25%	HBG2/LGALS1/COL4A5/EPS8/HIC1/HAS2/SNAI1/FOXC1/FBN2/ECE1/COL6A2/COL1A2/OLFML3/S100A10/CEBPD/CREB5/CD248/CNN3/SDC2/S1PR3/MT2A/TWIST1/GADD45B/ISG15/SLC2A3/RGS2/TIMP1/HBA2/NFKBIA/MRC2/TUBB6/JUNB/KLF2/ESAM/SERTAD1/EDN3/SCUBE1/MCAM/PLK2/CD99/SPON1/EMP3/IER2/LY6E/PTH1R/HBA1/MXRA5/CDC42EP1/ZFP36/DHRS3/PGF/CDC42EP3/SMARCA1/IGFBP6/ETS2/SIX1/IRF1/IQGAP1/LGI1/SOCS3/ANXA2/HES1/AHNAK/DKK2/CDH11/MFAP4/FGFR1/DCN…
GSE16450_IMMATURE_VS_MATURE_NEURON_CELL_LINE_DN	C7_immunologic	196	0.422512	1.93522	3.38917e-07	1.64444e-05	3879	tags=28%, list=18%, signal=23%	TNF/IRF8/TNFRSF4/LIF/IL2RA/TNFRSF9/LTA/SDC4/KBTBD8/GALR2/KCNK5/EPOP/FOSL1/EGR3/SLAMF1/RAB11FIP1/C17orf58/NEU1/MFSD2A/PCLAF/TLCD1/B3GNT5/NDFIP2/IL3/HOMER1/CALCB/SLC3A2/COL6A3/CDCA7/IL22/SNRPC/DTL/INSM1/ORC6/UHRF1/CENPN/CD320/CENPU/TOMM40/IL10/IL12RB2/IL17A/SHMT2/GINS2/NETO2/WRAP53/MCM4/CDC45/TOMM34/SPAG1/GINS3/TNIP3/ZBED2/FDX2
DAZARD_RESPONSE_TO_UV_SCC_UP	C2_curated	102	0.498977	2.06229	3.45124e-07	1.67193e-05	2029	tags=18%, list=9%, signal=16%	TNF/CXCL8/CXCL1/CXCL3/KYNU/PMAIP1/IL6/CXCL2/ATF3/MIR22HG/PTGS2/CSF2/GADD45A/ANXA2/ID2/TAGLN3/HEXIM1/RTN4
GSE3039_NKT_CELL_VS_ALPHAALPHA_CD8_TCELL_DN	C7_immunologic	195	0.428099	1.96068	3.47156e-07	1.67914e-05	2909	tags=25%, list=13%, signal=22%	TNFRSF18/PRF1/CD7/CCL5/DUSP2/SH2D1A/BAIAP3/IL2RB/PDCD1/NKG7/IL12RB1/CD28/CD3E/CD6/IL2RG/HCK/ZBTB32/TBX21/ADRB1/LCK/SH2D2A/CD5/DPYSL3/STAT1/GBP2/CD3D/PPP1R16B/LY6E/MNS1/SGCE/RPGRIP1/CD27/CST7/IRF1/EFHD2/TAP1/GEM/EPSTI1/SMAGP/MTHFD2/GZMB/HLA-B/TOX/ZBP1/ITK/PDK1/CTSW/UBASH3B/LAT
GSE7509_UNSTIM_VS_IFNA_STIM_IMMATURE_DC_DN	C7_immunologic	171	0.4389	1.95968	3.55458e-07	1.7166e-05	2732	tags=29%, list=13%, signal=25%	CD96/CXCL10/CSF1/IL2RA/TNFRSF9/ICAM1/STX11/PDCD1/CD3E/ADGRG5/DOK2/CD69/SOCS1/ISG15/NFKBIA/LCK/UPP1/IRAK2/NR5A1/SEMA7A/CD3D/PRDM1/ABCA1/CXCL9/CORO1A/KLRG1/ELL2/CST7/SLC2A6/IRF1/IFIT3/FURIN/ICOS/AHNAK/RNF19B/RSPO3/IFIT2/IL15RA/EPSTI1/HIVEP1/MYO1G/ENC1/SDC3/GGT1/CD300C/IL12RB2/CD8A/TLR2/USP18
LAKE_ADULT_KIDNEY_C16_COLLECTING_SYSTEM_PRINCIPAL_CELLS_CORTEX	C8_cellSignature	137	-0.485158	-2.05855	3.56332e-07	1.71814e-05	1734	tags=22%, list=8%, signal=20%	MYH10/KAZN/TMTC2/NAALADL2/ANK3/RAD51B/PTH2R/DLG2/ARL15/ST6GAL1/FTX/MYO10/THSD7A/PRKG1/PPP1R9A/MIR99AHG/MPPED2/GRIP1/NBEA/MAGI3/SDK1/NLGN1/THRB/SAMD12/NR3C2/MYO1E/NFIB/LIMCH1/BMPR1B/XIST
GO_EPITHELIAL_CELL_DIFFERENTIATION	C5_GO	768	0.295326	1.53903	3.58415e-07	1.72548e-05	4626	tags=31%, list=21%, signal=25%	TNF/ZNF703/WT1/LIF/FOXA1/ICAM1/FOXC1/CYP1A1/MMP9/ETV4/NEUROG3/AGR2/WNT10B/WNT1/CNN3/PAX8/SERPINE1/SFRP4/S1PR3/EMX1/FOXJ1/NTRK1/ESRP1/DSG4/CCND1/PKP3/TST/ANXA1/CDKN1A/SHROOM3/MSX2/SOX8/STAT1/KLF2/WNT11/SPRY2/GATA3/REG3G/OVOL1/VEGFA/FOXB1/SLC44A4/SCUBE1/RAB25/KRT24/SIX3/SFN/S1PR1/PRDM1/PPP1R16B/KRT39/SH3BP1/NPHS1/SPRY1/RARA/BASP1/SULT2B1/KRTAP19-5/TGM5/PITX3/EZR/LHX1/KRT1/ZFP36/CSTA/DSP/MYADM/PDGFB…
PYEON_CANCER_HEAD_AND_NECK_VS_CERVICAL_UP	C2_curated	188	-0.439071	-1.94996	3.77316e-07	1.81364e-05	4479	tags=41%, list=21%, signal=33%	FGFR1OP2/RBL1/STAG1/TXNDC16/PRPF39/CDK1/CEP152/KCTD3/CENPJ/KDM6A/GART/FMR1/SCML1/ANKRD36B/USP37/DDX59/HACE1/ZFX/RIMKLB/CCDC18/PAXBP1/WDHD1/SPICE1/KNTC1/CCHCR1/ZNF532/CREBZF/PXYLP1/ARHGAP5/CENPI/SYNJ1/SLC35A3/ERMP1/PRDM15/SMC4/LNPK/CASP8AP2/NR1D2/BRWD1/CXADR/PER3/INTS7/PDIK1L/SS18L1/ARL13B/CCDC14/HLTF/FANCL/DIP2A/MEIS1/SLF2/C2CD5/E2F8/CALML4/ZNF678/HOXA9/ENOSF1/XK/JPX/TMEM30B/C18orf54/RMI1/ABCA5/H…
GOLDRATH_EFF_VS_MEMORY_CD8_TCELL_UP	C7_immunologic	194	0.421994	1.92567	3.83396e-07	1.84e-05	6093	tags=42%, list=28%, signal=31%	IRF8/LGALS1/DUSP2/S100A10/IRF4/PDCD1/MT2A/S100A8/TYROBP/ANXA1/ITGAX/BHLHE40/F2RL3/CD99/EMP3/FPR2/KLRG1/LSP1/MYADM/KPNA2/PCLAF/MPEG1/ANXA2/NR4A1/HP/PLK4/GEM/ROM1/NEK2/DTL/ADAM8/TAGLN2/GZMB/LGALS3/MT1E/TYMS/ISG20/MAPK6/GTF2B/C3/TIPIN/TXN/TUBB3/CDC25C/EMP1/DBI/KIF11/GABARAPL1/SQLE/NCAPH/CDC45/GGH/RRM2/IDI1/EGR1/GMNN/RAD51AP1/CCNA2/CHEK1/TUBA1B/PRDX4/STMN1/LAG3/CKS1B/ANLN/AK3/LMNB1/HMGB3/IFITM3/S100A…
DACOSTA_UV_RESPONSE_VIA_ERCC3_DN	C2_curated	838	-0.302326	-1.55472	3.85172e-07	1.84566e-05	6203	tags=42%, list=29%, signal=31%	MBNL1/CDC16/ATP11B/IGF2R/NCOA1/BBX/KIAA0355/MAP2K4/USP15/FOXO3/CREBBP/ZNF292/GTF2E2/NBAS/NBPF14/XPO1/R3HDM2/RSBN1/NVL/PCCA/HELZ/NRG1/TUBGCP3/UPF2/ARHGAP12/SGMS1/SRGAP2/MTFR1/CENPF/WWP1/PUM3/CDC27/SETX/XRCC4/KDM3B/TGFB2/CKAP5/DDX10/TOP2A/SLC4A7/DMD/TTC37/TGIF1/PAWR/NSMAF/SUPT20H/ZEB1/AKAP11/SPAST/CDK13/STARD13/GINS1/RIF1/VLDLR/SRSF7/COL5A2/SPECC1L/MAN2A1/BLM/ASCC3/MAP4K5/NEK4/TERF1/GSE1/PPP2R5A/KL…
HINATA_NFKB_TARGETS_FIBROBLAST_UP	C2_curated	81	0.544869	2.16551	3.89808e-07	1.86498e-05	2516	tags=37%, list=12%, signal=33%	PTX3/CXCL8/MSC/CXCL1/CXCL3/G0S2/ICAM1/IER3/CD83/RELB/IL6/SERPINE1/SERPINB2/NFKBIA/TNFAIP3/VEGFA/GCH1/TNFAIP2/NFKB2/GADD45A/IRF1/EDN1/EGFR/FGF5/NFKB1/VIM/MTSS1/RND3/FGF1/MAP1B
KRAS.BREAST_UP.V1_UP	C6_oncogenic	133	0.475048	2.03011	3.9195e-07	1.87232e-05	3944	tags=38%, list=18%, signal=31%	PDE3B/STX1A/CXCL3/LIF/HAS2/IL1RL1/BAIAP3/MMP9/SAMD14/CXCL2/IL2RG/KCNJ16/TNFAIP3/S100A5/EFNA5/CYB5R2/CSF2/SPRY2/OCA2/PRDM1/ATP12A/BIRC3/LILRA6/TRAF1/KCNK15/TAGLN3/HSD17B2/CCL22/SCEL/KCNA2/CTNNA2/ADAMDEC1/GULP1/USH2A/COL9A1/GSG1/OPRPN/KRT34/CEACAM3/CMA1/KLK12/NPPB/IGF2/CDSN/STC1/SPON2/SPACA1/ESM1/ETV2/IL13RA2
GO_IMMUNOGLOBULIN_COMPLEX	C5_GO	139	0.462514	1.999	3.93091e-07	1.87487e-05	8126	tags=65%, list=37%, signal=41%	JCHAIN/IGKC/IGLV1-40/CD79A/IGHJ1/TRBC2/TRDC/IGKV1-5/IGHV2-26/IGLL1/IGLV6-57/IGKV5-2/IGLV3-10/IGKV1-8/IGKV1D-17/IGHV3-7/IGLC3/IGHV1-18/IGHE/IGHV1-58/IGHM/IGLV8-61/IGKV1D-42/IGKV1-12/IGKV1-17/IGLC2/IGHG1/IGLV3-21/IGKV4-1/IGKV1D-13/IGKV1-39/IGLV3-1/IGKV3-15/IGKV6D-41/IGKV3-7/IGKV2D-24/IGKV1D-12/IGKV6D-21/IGLV4-3/IGLV3-19/IGHV3-53/IGHV2-5/IGHD1-1/IGHV2-70D/IGHV3-21/IGHV3-35/IGKV1-27/IGKV1-37/IGKV1D-3…
GSE46606_UNSTIM_VS_CD40L_IL2_IL5_DAY1_STIMULATED_BCELL_UP	C7_immunologic	187	-0.437027	-1.94218	4.08962e-07	1.94756e-05	4283	tags=41%, list=20%, signal=33%	MBTD1/SNAI2/TIA1/CACNA2D4/TRIM22/AKR1C3/SORT1/MBD5/ZNF512/MEGF6/CBLB/RCOR3/C3orf67/EFHC1/ZC3H4/ERMP1/MGME1/MEIG1/BCKDHB/SPATA7/ASF1A/SORL1/TBC1D2B/TOLLIP-AS1/MAP2K6/MAST4/TMEM19/CTTNBP2NL/PROM1/DBP/SLC35E2B/CEP68/FHL2/MAT2B/SH3PXD2A/LINC00847/CCDC14/ACADSB/BRD8/ZFP62/WDR19/KIZ/GPR155/FRY/SIRT5/TCAIM/DCP1B/JAKMIP2/DET1/APOLD1/SYNRG/IRF2/PRKD1/CHN1/ZNF226/ZMYND8/BTN3A2/SLC24A1/LINC02035/CEP19/KCNMB…
MODULE_32	C4_computational	230	0.401643	1.87505	4.11724e-07	1.95769e-05	10308	tags=70%, list=47%, signal=37%	RPS4Y1/DDX3Y/IGF2BP3/RAB31/EEF1A2/CBX4/ZFP36/EIF5A/GEM/SNRPC/TUBA4A/EIF4G2/LSM1/PSMA1/RHOA/EIF3C/TUBB3/YBX1/RHOH/NUDT1/TUFM/RIT1/GNAI2/GNAS/RAB5A/TUBB4B/RALA/EIF1/RPS16/ETF1/RBM3/SRP19/EIF4A3/RPS2/RPS17/SRP14/RPLP2/RPN1/SNRPD2/ARF5/HNRNPA0/BZW1/RPL23A/SLBP/RPL29/EIF6/RPLP1/RPL6/EIF4H/RPS15/RAB5C/ELOC/KHDRBS1/RPL26/PCBP1/RPL19/RPA3/EIF3I/SNRPA/SNRPE/RPS8/ZC3H11A/ILF2/RPS7/EIF4EBP1/SNRPF/XRCC6/RPL8…
HALLMARK_COMPLEMENT	Hallmark	200	0.414141	1.90197	4.17055e-07	1.97999e-05	2229	tags=22%, list=10%, signal=20%	CP/CXCL1/CCL5/DUSP5/KYNU/TFPI2/F3/SERPINA1/IL6/FCN1/S100A9/SERPINE1/S100A12/ADRA2B/HPCAL4/TIMP1/SERPINB2/PLAUR/TNFAIP3/LCK/GATA3/FCER1G/APOC1/DOCK9/GP9/CASP5/ACTN2/PDGFB/CTSV/IRF1/SCG3/SH2B3/CEBPB/FDX1/RHOG/C1S/PCSK9/PIM1/PLA2G7/MAFF/ITGAM/GZMB/LGALS3/PRKCD/IRF7
GNF2_ITGB2	C4_computational	54	0.606245	2.23792	4.20718e-07	1.99431e-05	4051	tags=50%, list=19%, signal=41%	IL10RA/DOK2/HCK/RGS2/TYROBP/ITGAX/FGR/FCER1G/ADGRE5/LILRA1/IRF1/EFHD2/LST1/RHOG/IQGAP1/TNFRSF1B/PTGER4/SH3BGRL3/ITGB2/ITGAM/ADAM8/ELF4/CMTM6/MYO1F/AIF1/GMIP/APOBR
MIR548AZ_3P	C3_motif	476	-0.343812	-1.68204	4.22527e-07	1.99981e-05	4849	tags=33%, list=22%, signal=26%	IKBIP/DTD2/ELK4/TRUB1/PHC3/TRAPPC8/LEPROT/SCML1/ZBTB14/DIDO1/C3orf70/TRMT10A/ZBTB41/RAB27B/HCFC2/KLF9/ZNF148/BRWD3/LPP/TNRC18/HACE1/ZNF569/ZNF260/SMAD4/ZFX/PHIP/IKZF2/TBL1XR1/GNS/TRPM7/SPIN4/MAP7/N4BP2L1/VPS13C/NTN4/ZBTB44/MYEF2/ZNF264/ATXN3/POU4F1/ZFAND4/PCGF5/CLASP2/TGFBR3/CPNE3/MECP2/PIKFYVE/TRMT5/SERINC5/NHLRC2/GPAM/SCAI/USP33/LYRM7/BRWD1/TAOK1/GTF2IRD2/TMEM245/TMEM169/ZFPM2/STAM2/FAM149B1/AN…
GO_RESPONSE_TO_INTERFERON_GAMMA	C5_GO	195	0.426048	1.95128	4.23306e-07	2.00043e-05	3121	tags=27%, list=14%, signal=23%	CCL3/IRF8/CCL5/CCL4/KYNU/HLA-G/STAR/ICAM1/OASL/RAB20/IRF4/IL12RB1/CCL2/XCL1/IFITM1/SOCS1/MT2A/HCK/GBP5/STAT1/GBP1/GBP2/GCH1/CAMK2A/IFI30/CCL3L3/GBP7/CCL3L1/IRF1/EDN1/SOCS3/FCGR1A/IFITM2/CLDN1/CALCOCO2/IRGM/CCL22/VIM/CCL19/ZYX/PRKCD/HLA-B/IRF7/CCL25/ACOD1/CCL18/TLR2/HLA-A/ACTG1/GAPDH/WNT5A/CCL15/LGALS9
MORF_PPP1CA	C4_computational	161	0.446487	1.98757	4.30261e-07	2.03019e-05	10165	tags=73%, list=47%, signal=39%	MYLPF/PCLAF/COX5A/PPP1CA/COX6A1/HSP90AA1/PSMD9/PSMD7/PSMB2/PSMB1/EIF3C/HSBP1/TUFM/RAD23B/ARHGDIA/COX4I1/HDGF/HDAC1/SNRPD2/ARF5/PSMD8/CSNK2B/SUMO1/COX5B/LYPLA1/NDUFA2/SET/HNRNPAB/CYC1/COPE/EIF4H/PPM1G/PSMC1/PRMT1/TMED2/ELOC/KHDRBS1/SLC25A3/PSMC3/FIBP/COX6C/ANP32B/C9orf16/EIF3K/PUF60/SNRPE/RPL36AL/URM1/DDX49/RALY/SUMO3/CCT7/SUMO2/JTB/NDUFA1/PARK7/SRSF9/STARD7/HNRNPUL1/NEDD8/CDC123/HNRNPC/ARPC1B/LSM…
GO_POSITIVE_REGULATION_OF_IMMUNE_EFFECTOR_PROCESS	C5_GO	215	0.406358	1.89308	4.3295e-07	2.03976e-05	4739	tags=36%, list=22%, signal=28%	TNF/TNFRSF4/SH2D1A/HLA-G/CLCF1/IL23A/IL6/NCR3/LTA/IL12RB1/CD177/CD28/XCL1/NR4A3/HLX/TYROBP/ANXA1/TBX21/CRTAM/SEMA7A/RIPK2/FGR/GATA3/FCER1G/HMOX1/RARA/NFKBID/SLC22A13/SLC7A5/NLRP3/CD1B/CD160/NECTIN2/FCER2/TLR9/ITGB2/CD1A/FFAR2/IL18RAP/CCL19/STAP1/TGFB1/CD1E/ITGAM/HLA-B/KIR2DL4/MIF/CD1C/LILRB1/IL4/SH2D1B/FOXF1/C3/HLA-A/TICAM1/WNT5A/PLA2G3/LGALS9/KLK7/NOD2/CD80/BCL10/SPON2/SLAMF6/IL13RA2/KLK5/RAPGEF…
GO_CHEMOKINE_RECEPTOR_BINDING	C5_GO	61	0.587714	2.21327	4.39105e-07	2.0656e-05	3839	tags=41%, list=18%, signal=34%	CCL3/CXCL8/CXCL1/CXCL3/CCL5/CXCL10/CCL4/CXCL2/CCL2/XCL1/CXCL11/STAT1/CXCL9/CCL3L3/CCL3L1/CCL22/CCL19/CCL25/CCL18/CKLF/CCL15/CXCL13/CXCL16/CCL1/XCL2
VERHAAK_AML_WITH_NPM1_MUTATED_DN	C2_curated	241	0.39812	1.87132	4.45209e-07	2.09113e-05	2453	tags=27%, list=11%, signal=24%	HBG1/PDE3B/CD7/EPS8/TPSAB1/RETN/BAIAP3/PMAIP1/MXRA7/MMP9/TRH/P2RX5/MPO/HPGD/IL5RA/CD69/IFITM1/ZAP70/DLK1/PRTN3/CD48/TMEM158/S100P/PRAME/HPGDS/ALAS2/GATA3/CSGALNACT1/VEGFA/TRIB2/RAMP1/SERPINF1/CHI3L1/CD3D/TCN1/PPP1R16B/SPRY1/SPON1/BPI/MS4A3/EZR/TRBC2/KRT1/DHRS3/RUNX3/NT5E/CST7/TSPOAP1/TRDC/FGFR1/PTGER4/ITM2A/SPIB/MEG3/LRP3/GYPC/RGS1/STAP1/SMAGP/PDE4B/ISG20/CYP2E1/TOX/GNAI1/CD1C
RUTELLA_RESPONSE_TO_CSF2RB_AND_IL4_DN	C2_curated	313	0.367448	1.77086	4.52102e-07	2.11693e-05	2158	tags=19%, list=10%, signal=17%	CCL3/CXCL1/CXCL3/CXCL10/NRIP3/HBEGF/TREM1/RAB20/SH3BP5/NKG7/FCN1/S100A9/SGK1/AQP9/CCL2/GADD45G/S100A12/MT2A/NEDD9/BHLHE41/SLC2A3/RGS2/CRTAM/CD48/LY86/PLIN2/STAT1/PPIF/MAFB/CYBB/C5AR1/CCR1/PELI1/FCAR/FPR1/C3AR1/SLC16A6/ZFP36/NLRP3/ETS2/FDX1/RGCC/MT1H/IFI6/CFD/FCGR1A/MT1G/IFITM2/VMP1/DDIT4/LILRB4/LPXN/PTGDS/PLA2G7/HERPUD1/SLC30A1/LGALS3/TUBA4A
CREL_01	C3_motif	252	0.390758	1.84388	4.52739e-07	2.11693e-05	3298	tags=27%, list=15%, signal=23%	MSC/GNG4/CCL5/CXCL10/BCL6B/IL2RA/TNFRSF9/ICAM1/CD70/IER3/MMP9/BCL3/RELB/S100A10/HCST/WNT10B/LTB/SDC4/TRAF4/CD69/GADD45B/IER5/NFKBIA/MAP3K8/CXCL11/KCNN2/TRIB2/WNT10A/NFKBID/SLC16A6/SMPD3/CSF1R/NFKB2/BIRC3/ELMSAN1/PARP8/S1PR2/SH2B3/RASGRP4/TNFRSF1B/EIF5A/RAP2C/LAMA1/REL/PCDH10/ABI3/TMEM88/HIVEP1/TLX3/MSX1/PPP1R13B/WNT4/IL17C/FGF1/MAPK6/SLC30A3/RIMS2/SMYD2/SIX4/PFN1/ZNF593/FOXS1/CACNG3/NXPH4/MLLT11/…
MIR106B_5P	C3_motif	665	-0.314895	-1.58641	4.5276e-07	2.11693e-05	3993	tags=27%, list=18%, signal=23%	OCRL/MAP7/ANO6/TAOK3/GAB1/UBE3C/REV3L/NTN4/ZNF264/MAP10/NKIRAS1/CC2D1A/PXYLP1/SMOC1/EFCAB14/USP46/FGD5/PKD2/PLAG1/ZFAND4/RAB10/SLC33A1/TANC1/CLOCK/RPS6KA6/PRR14L/OSBPL5/USP28/CRYBG3/KIF26B/SCN2A/ZNF652/CENPQ/PRDM6/BEST3/RBL2/FGL2/CLIP4/BRWD1/TIAM1/TAOK1/NAGK/FAM102A/SORL1/REEP3/E2F5/ZFPM2/SLC4A8/BAMBI/EZH1/GOLGA1/CNOT6/CREB1/ATL3/ABCD2/RBM12B/SLC46A3/TMEM25/TBC1D17/ANKFY1/ATG2B/MEX3D/UNKL/ITGB8/S…
MODULE_289	C4_computational	123	0.479036	2.04596	4.54661e-07	2.12056e-05	5025	tags=41%, list=23%, signal=31%	CCL3/CXCL8/CXCL1/HCAR3/GPR183/CXCL2/ADRA2B/GHRHR/GABRA2/GPR65/C5AR1/CCR1/FPR1/CXCL9/FPR2/C3AR1/NTSR1/GNA15/OPRK1/ACKR1/HCRTR1/GCG/GRM3/BDKRB2/RGR/P2RY14/CCR8/GNAI1/C3/DRD3/TSHB/GABRA5/CXCL13/ADORA2A/GRK1/PNOC/P2RY10/GRM8/RGS4/GRB7/PTGER3/CCL17/PTPN6/LPAR6/GPR17/GNA13/DEFB4A/GPR171/ADCYAP1R1/RGS16
GO_NEGATIVE_REGULATION_OF_CELL_DIFFERENTIATION	C5_GO	688	0.304211	1.57591	4.54912e-07	2.12056e-05	3511	tags=24%, list=16%, signal=21%	TNF/CCL3/LGALS1/INHBA/NPPC/CXCL10/FOXA1/NFATC4/NTN1/SNAI1/HLA-G/SPP1/TRIB1/MMP9/NGFR/IL6/DLX2/WNT10B/WNT1/LDLR/ZC3H12A/SEMA6A/PRAG1/S1PR3/FOXJ1/PHOX2B/SOCS1/PTHLH/TWIST1/BHLHE41/GPER1/RGS2/BCL6/HLX/EPHA4/CCND1/DUSP10/NFKBIA/EFNA5/ANXA1/TBX21/APOE/WNT9A/RTN4RL2/MSX2/PRAME/SHH/SOX8/CNTF/DPYSL3/EFEMP1/STAT1/TRPC5/SEMA7A/MAFB/SPRY2/GATA3/REG3G/GBP1/JDP2/VEGFA/TRIB2/OLIG2/PLK2/AREG/SIX3/ABCA1/SPRY1/RA…
MODULE_44	C4_computational	317	0.367661	1.7713	4.58755e-07	2.13525e-05	3504	tags=30%, list=16%, signal=25%	IRF8/DUSP2/TCF7/JCHAIN/SPP1/MMP9/COL6A2/COL1A2/IGKC/S100A9/LTB/MPO/CD3E/CD69/CD6/S100A8/IL2RG/ISG15/RAB31/COL6A1/BCL6/HAP1/TNFAIP3/CYP1B1/LEF1/LCK/CD48/APOE/PLIN2/STAT1/FXYD2/TRIB2/CD79A/APOC1/CD3D/SH3BP1/EMP3/CORO1A/RNASE6/CHI3L2/ACTC1/BIRC3/LSP1/DHRS3/DSP/CD27/CYP4B1/SOX4/RHOG/IFIT3/TNFRSF1B/CFD/FGFR1/ITM2A/KRT15/TAP1/ITGB2/EGFR/LMO3/COL6A3/C1S/DDIT4/ACKR1/LPXN/ALOX5AP/CCL19/RGS1/RGS10/TGFB1/S1…
GSE7548_NAIVE_VS_DAY7_PCC_IMMUNIZATION_CD4_TCELL_DN	C7_immunologic	194	0.420056	1.91683	4.60528e-07	2.14028e-05	3564	tags=25%, list=16%, signal=21%	ADM/CXCL10/DUSP5/IL10RA/OASL/SSTR2/CD69/IFITM1/SOCS1/MT2A/ISG15/CXCL11/RGL1/GBP1/GCH1/ADGRE5/CXCL9/KLF6/IER2/CASP5/ZFP36/ETS2/IFIT3/ST3GAL5/ABTB2/IFITM2/RNF19B/TAP1/IFIT2/IL15RA/UBE2S/SLC30A1/MNDA/P2RY14/PRKCD/IRF7/ELF4/ASIP/ISG20/GTF2B/FAS/MX1/MAMLD1/PSMA2/PRKAB1/ARID5A/STK17B/RAB5A
RODWELL_AGING_KIDNEY_NO_BLOOD_DN	C2_curated	139	-0.480227	-2.0437	4.62672e-07	2.14701e-05	3664	tags=32%, list=17%, signal=26%	ADCY1/PPFIA1/SLC16A7/BCKDHB/LINC00667/CLASP2/SHANK2/TMEM80/ITPR1/FOLH1/TBC1D24/PPM1K/SOHLH2/TPD52/IGF1R/MTR/FRMD3/AMT/LPL/LRRC2/PCLO/ENOSF1/CTH/RALGPS1/KLHL3/AUTS2/ZNF711/DBT/ABCA5/THSD7A/GSTA4/SLC22A23/EGF/ARFGEF3/GPRASP1/FMO5/MPPED2/PEG3/NUDT7/C3orf14/DSG2/TBC1D9/THRB/AASS
GO_REGULATION_OF_VASCULATURE_DEVELOPMENT	C5_GO	325	0.361567	1.7548	4.65534e-07	2.15704e-05	2033	tags=18%, list=9%, signal=16%	TNF/ADM/PDE3B/CXCL8/WT1/CXCL10/THBS1/TNFRSF12A/ADGRA2/HLA-G/FOXC1/F3/NGFR/IL6/PROK2/SERPINE1/ZC3H12A/SEMA6A/TWIST1/GPER1/TNFAIP3/CYP1B1/ANXA1/PTGS2/STAT1/KLF2/ITGAX/SPRY2/PRKCA/VEGFA/CYBB/SERPINF1/C5AR1/CHI3L1/PLK2/RHOB/HMOX1/PPP1R16B/APELA/GHRL/C3AR1/FBLN5/KRT1/PGF/PDGFB/GADD45A/CD160/ADM2/RGCC/DCN/ITGB2/TIE1/SPINK5/DAB2IP/CARD10/RAMP2/WNT4
GNF2_CASP1	C4_computational	107	0.509766	2.12628	4.72667e-07	2.18681e-05	3535	tags=37%, list=16%, signal=31%	IL10RA/STX11/FCN1/APOBEC3A/HCK/RGS2/TYROBP/JUNB/FGR/MAFB/FCER1G/CYBB/CCR1/IER2/CD33/TNFAIP2/LILRB3/LILRA6/LILRA1/LST1/RHOG/IQGAP1/COTL1/TNFRSF1B/NCF2/SH3BGRL3/ITGB2/ITGAM/MNDA/PRKCD/SAMHD1/LILRB1/TLR2/CMTM6/TYMP/MYO1F/TKT/NOD2/AIF1/LILRA2
MIR340_5P	C3_motif	773	-0.307695	-1.56735	4.73978e-07	2.18959e-05	4121	tags=27%, list=19%, signal=23%	SRGAP1/PRELID2/MRE11/ZBTB37/LCORL/WDR12/FSD1L/KIT/SENP6/SMARCAD1/GDAP2/TMTC1/MAP7/UBR3/HERC3/CFAP97/ARID1B/OSBPL6/CYFIP1/ADAMTS19/SLC36A4/CAPN7/PIK3C2A/REV3L/PKNOX1/ADGRL3/MAPK14/PXYLP1/TTC8/BTAF1/ZNF417/CBLB/SKP2/KIF14/CNTLN/C5orf47/MAT2A/ZFAND4/POLK/SLC33A1/POU2F1/TMEM106B/RPS6KA6/CCSER1/ANKRD13D/LRP5/ALG10B/SWSAP1/KIAA0586/NDC1/HECW2/SLC11A2/ZNF652/VPS54/PPP3CB/FGL2/NR1D2/ZNF507/CD36/PLPPR5/CL…
MIR1277_5P	C3_motif	877	-0.300164	-1.54967	4.75534e-07	2.19098e-05	4431	tags=29%, list=20%, signal=24%	RNF217/ARHGAP20/METTL6/HACE1/SIK3/CPEB3/SAV1/TC2N/ZNF260/RIMKLB/PHIP/CBX8/ARHGAP39/CCNH/EPHA1/ZZZ3/YIPF4/NRIP1/WDHD1/SATB2/HDAC9/TBL1XR1/TAF4/SYT1/SGK3/TRPM7/FSD1L/GDAP2/DOCK7/TMTC1/AFF3/TTC33/MEX3B/CREBZF/TEX2/PIK3C2A/KL/VPS13C/RFX3/ZBTB44/FBXO4/ABHD10/ARHGAP5/BTAF1/BET1/FAM214A/WIF1/KIF14/USP46/RHOT1/FOSB/DISC1/PLAG1/PTAR1/PCGF5/SLC16A7/CLOCK/LRP6/POU2F1/PCID2/ATF7IP/TMEM106B/RPS6KA6/TGFBR3/SYN…
AIZARANI_LIVER_C21_STELLATE_CELLS_1	C8_cellSignature	187	0.424536	1.93255	4.75697e-07	2.19098e-05	2904	tags=35%, list=13%, signal=30%	LGALS1/THBS1/PHLDA1/MARCKS/IL1RL1/MXRA7/IER3/COL6A2/COL1A2/OLFML3/CEBPD/FBLN2/CCL2/SERPINE1/MMP19/LGALS3BP/RGS2/TIMP1/COL6A1/FILIP1L/JUNB/CDKN1A/CRYAB/CRISPLD2/EFEMP1/LMNA/SERPINF1/CH25H/ITGB5/FBLN5/CSRNP1/ZFP36/CDC42EP3/MYADM/CEBPB/SOCS3/MFAP4/DCN/IFITM2/GEM/COL6A3/MASP1/C1S/VIM/PTGDS/BTG2/TIPARP/TIMP3/MAFF/IGFBP5/RND3/TPM4/ZFP36L1/CPXM2/COL3A1/NEXN/CD63/MAP1B/CCDC80/ITGA8/ITM2C/PRELP/MKNK2/GPX3…
MIR4652_3P	C3_motif	320	-0.380283	-1.79794	4.81873e-07	2.21611e-05	3997	tags=32%, list=18%, signal=26%	ZFP28/UHRF2/ZNF445/NPR3/SLC36A4/MYC/RFX3/PDE1C/CDRT1/DISC1/CD84/TRIQK/ADAM12/CRYBG3/MBOAT2/ZNF652/TTC28/MEF2C/ZNF146/GTPBP10/ALG13/TMEM67/NKAIN2/RASSF8/PCDHGC5/TNRC6B/AKAP10/SLC38A6/C20orf202/MRPS14/CNNM2/NSF/SNAPC1/ZFHX3/CPNE8/SBF2/CARF/MSANTD2/ZDHHC21/COX15/KIAA0895/PLXNA2/AKAP5/TLR4/KIAA0825/ETNK1/IKZF3/CDK19/PCDHGA7/ZFP36L2/CACNA2D2/TCF4/ZNF547/CCDC191/RSPH4A/PCDHGB7/TCEANC/BCL11A/PCDHGA3/WDR…
GSE21360_TERTIARY_VS_QUATERNARY_MEMORY_CD8_TCELL_DN	C7_immunologic	176	0.431059	1.94499	4.98617e-07	2.28971e-05	3552	tags=33%, list=16%, signal=28%	INHBA/ICAM1/RAB20/CD83/RELB/S100A9/SDC4/ZC3H12A/CD69/IL2RG/NFKBIA/UPP1/STAT1/CYBB/CD79A/MARCKSL1/PDE7B/CCDC50/LAMA2/NQO1/NLRP3/EBI3/CST7/CEBPB/LST1/DGAT2/FSCN1/TNFRSF1B/IFITM2/PFKFB3/TRAF1/CMTM3/MTHFD2/TPM4/PRKCD/PDE4B/MAPKAPK2/ATF4/SLC1A2/CMPK2/TLR2/C3/HIF1A/LCN2/FLRT3/USP18/FAS/EAF1/ODC1/TXNDC17/HPN/SAMSN1/MRPL52/ME1/PRKAB1/TES/CAV1/CD80
GSE22886_NAIVE_CD8_TCELL_VS_MONOCYTE_DN	C7_immunologic	196	0.419773	1.92267	5.00739e-07	2.29603e-05	3555	tags=29%, list=16%, signal=24%	IRF8/MARCKS/SLC15A3/BCL3/SERPINA1/CEBPD/FCN1/S100A9/S100A12/S100A8/APOBEC3A/HCK/RAB31/BCL6/CLEC7A/TYROBP/FGR/MAFB/FCER1G/SAT1/CYBB/C5AR1/FCGR2A/CCR1/IFI30/HMOX1/FPR1/SLC16A6/CD33/TNFAIP2/CSF1R/LILRB3/CSTA/CDC42EP3/ANXA2/TNFRSF1B/NCF2/SNX11/SIGLEC9/SLC31A2/S100A11/MNDA/LGALS3/PRKCD/LY96/LILRB1/TLR2/CKAP4/CD93/PTPRE/SLC7A7/RAB32/LYZ/NOD2/LILRA2/TNFRSF10B
LAKE_ADULT_KIDNEY_C5_PROXIMAL_TUBULE_EPITHELIAL_CELLS_STRESS_INFLAM	C8_cellSignature	405	-0.355441	-1.71817	5.05002e-07	2.31215e-05	3644	tags=26%, list=17%, signal=22%	ZC4H2/FGGY/CTSH/C19orf12/TPCN1/PRKAG2/DPH6/KIF26B/PTPRG/LUC7L/NFIX/RIN2/BBS9/SHANK2/CYP4A22-AS1/MAP3K13/OPHN1/URGCP/CSMD1/TNRC6B/HOOK2/ITSN1/SLC16A10/TTC23L/TCEA3/SUGCT/OTUD7A/MMP15/NR6A1/TMEM63A/PPP1R21/PIGL/CNTN1/PCSK5/TPD52/PPARA/CUBN/CDON/RAPGEF3/WDR19/ABAT/CFAP46/AFMID/CCDC191/C11orf65/SLC2A9/FRMD3/CLUAP1/TNRC6C/FAM227B/DPP10/TAPT1-AS1/LINC00907/RAB11FIP3/TMEM232/ANK1/METTL7A/RNF152/TLN2/ATX…
ST_TUMOR_NECROSIS_FACTOR_PATHWAY	C2_curated	29	0.722193	2.30343	5.14621e-07	2.3527e-05	1813	tags=31%, list=8%, signal=28%	TNF/NFKBIA/TNFAIP3/NFKBIE/NFKB2/BIRC3/NFKBIB/TNFRSF1B/NFKB1
GSE17721_POLYIC_VS_PAM3CSK4_2H_BMDC_DN	C7_immunologic	198	0.417759	1.91574	5.15493e-07	2.35319e-05	3515	tags=30%, list=16%, signal=25%	HDC/THBS1/FOXA1/GPR84/PHLDA2/DUSP2/JPH1/IL1RN/MARCKS/DPF1/UBXN10/IL1RAP/PLEKHG5/S1PR3/MT2A/RRAS2/MAP3K8/PTGS2/SHD/EFEMP1/RHOB/CH25H/FPR2/MGAT3/MNS1/KRT1/PDE6G/EBI3/SAG/EDN1/NFKBIB/ACTA1/RNF19B/DSCAM/TIE1/MET/NFKB1/BOP1/SOX9/HERPUD1/TCF21/P2RY14/PROX1/CRYBA4/TYMS/PIK3R1/GTF2B/HSP90AA1/HOXB1/HMGB4/EBF3/DRD3/ATP2B2/HAND2/ADIG/RAB32/RAD23B/SNRPB/REPIN1
FRIDMAN_SENESCENCE_UP	C2_curated	75	0.554375	2.16204	5.25643e-07	2.39599e-05	2895	tags=39%, list=13%, signal=34%	THBS1/F3/COL1A2/HSPA2/SERPINE1/ISG15/RAB31/SERPINB2/CCND1/TNFAIP3/CYP1B1/FILIP1L/CDKN1A/CDKN2D/CRYAB/STAT1/RHOB/MAP2K3/CDKN2B/TNFAIP2/IGFBP6/MAP1LC3B/VIM/S100A11/IGFBP5/IRF7/CDKN2A/CDKN1C/ING1
KOBAYASHI_EGFR_SIGNALING_24HR_DN	C2_curated	247	0.39405	1.85003	5.34553e-07	2.433e-05	4050	tags=30%, list=19%, signal=25%	DUSP5/PHLDA2/IL11/TNFRSF12A/G0S2/TFPI2/IER3/OASL/TUBB2A/DUSP4/CCND1/TUBB6/TMEM158/UPP1/PPIF/FOSL1/AREG/TCN1/CDC42EP1/MYBL2/SLC29A1/AXL/ELL2/E2F1/NT5E/TEX30/KPNA2/PLK4/PSMC3IP/MET/NEK2/SOX9/CARD10/DTL/ORC1/UBE2S/CDT1/MAFF/ORC6/CENPN/CENPU/ETV5/CDC25A/PLK1/TYMS/NME1/FABP5/TIPIN/ODC1/CKLF/SRM/HMGB2/EEF1E1/GINS2/CDCA4/NETO2/KIF11/MCM4/NCAPH/CDC45/STC1/NDC80/GJB3/ETV1/GINS3/TUBB4B/RRM2/PKMYT1/RANBP1/N…
GSE18791_CTRL_VS_NEWCASTLE_VIRUS_DC_14H_DN	C7_immunologic	181	0.43048	1.95672	5.41057e-07	2.45898e-05	2558	tags=26%, list=12%, signal=23%	TNF/IRF8/NIPAL4/GAL3ST2/DUSP5/KCNN1/BCL6B/FEZ1/PMAIP1/CREB5/LTA/SEMA6A/NINJ1/ISG15/C19orf84/TNFAIP3/HES4/GBP5/IRAK2/EDN3/GCH1/HMCN2/PELI1/CACNA1A/CXCL9/COL7A1/CSRNP1/WFDC5/IRF1/IFIT3/ABTB2/IFIT2/IL15RA/GCK/EPSTI1/PAG1/RARG/TMCC3/LINC00608/LINC01565/IRF7/NEXN/PITX1/ZBP1/CSRP2/CMPK2/CDKN2A
GO_NEGATIVE_REGULATION_OF_DEVELOPMENTAL_PROCESS	C5_GO	934	0.282912	1.49941	5.419e-07	2.45919e-05	3511	tags=24%, list=16%, signal=21%	TNF/CCL3/PDE3B/LGALS1/INHBA/WT1/NPPC/CXCL10/THBS1/FOXA1/NFATC4/NTN1/SNAI1/HLA-G/FOXC1/SPP1/TRIB1/MMP9/NGFR/IL6/PDCD1/DLX2/WNT10B/WNT1/PAX8/LFNG/SERPINE1/LDLR/ZC3H12A/SEMA6A/PRAG1/S1PR3/FOXJ1/PHOX2B/SOCS1/PTHLH/TWIST1/BHLHE41/GPER1/RGS2/TIMP1/BCL6/HLX/EPHA4/CCND1/DUSP10/NFKBIA/EFNA5/ANXA1/TBX21/LEF1/ADRB1/APOE/CDKN1A/WNT9A/RTN4RL2/MSX2/PRAME/SHH/NR5A1/SOX8/CNTF/DPYSL3/EFEMP1/STAT1/KLF2/TRPC5/SEMA7…
MIR4261	C3_motif	429	-0.354458	-1.71882	5.47281e-07	2.47996e-05	4540	tags=31%, list=21%, signal=25%	CAST/ZDHHC17/ZNF148/MEIOC/KIAA1211L/PTPRM/USP37/MYO19/TNKS/DCAF7/RIMKLB/PHIP/ERCC6L2/HDAC9/MLEC/TBL1XR1/DMKN/UBE2V1/TRDMT1/AFF3/SHISA9/HERC3/EBAG9/CAPN7/PDE1C/MYEF2/STAU2/AGAP2/TMEM50B/MAGI2/CELSR3/POU4F1/CASD1/ANGPT1/NFATC2/PTAR1/ADAM28/CLOCK/CLASP2/MID2/DOLPP1/ATP6V0D2/CHD9/SCN2A/ZMYND11/KCNK6/PLPPR5/MEF2C/SHQ1/OPHN1/SHPRH/DPF3/TBC1D2B/TMTC3/AKAP10/MCC/ABCD2/AGO3/NHEJ1/INTS7/TXNDC15/TBC1D32/CD1…
GO_POSITIVE_REGULATION_OF_DEFENSE_RESPONSE	C5_GO	361	0.356958	1.74687	5.61241e-07	2.53774e-05	3546	tags=26%, list=16%, signal=22%	TNF/CCL3/CCL5/SH2D1A/IL1RL1/HLA-G/IL23A/RELB/IL6/NCR3/LILRA5/FCN1/LTA/S100A9/PYHIN1/SERPINE1/LDLR/CD28/CCR7/S100A12/CD6/S100A8/HCK/F12/TNFSF11/CLEC7A/NFKBIA/HAVCR2/CRTAM/PTGS2/GBP5/MUC4/RIPK2/FCER1G/FPR2/PSMA8/CLEC4D/CD160/NECTIN2/CEBPB/TLR7/MATR3/PLA2G2A/MUC12/MUC3A/PTGER4/TLR9/EGFR/IRGM/FFAR2/IL18RAP/HEXIM1/NFKB1/DDT/STAP1/CCK/PLA2G7/ADAM8/MNDA/NRAS/PRKCD/IRF7/KIR2DL4/OSM/CYBA/ZBP1/IL17A/TLR2/S…
MIR3671	C3_motif	625	-0.320856	-1.60794	5.61676e-07	2.53774e-05	3538	tags=22%, list=16%, signal=19%	LRP6/POU2F1/ZNF45/TMEM106B/MID2/CPNE3/SPOCK3/ANKRD44/ALG10B/ST8SIA4/KLHL31/SCAI/TMEM192/NRG3/NR1D2/CCZ1B/ZNF250/ABCC4/LYPLAL1/USP54/AP1AR/SORL1/REEP3/ZDHHC14/PRKACB/POGLUT1/CNOT6/TNRC6B/FGF7/MCC/PCMTD1/RABGEF1/TTC39B/PDK3/BTLA/STK32B/ABCC10/PAPOLG/NEK1/ITGB8/IQGAP2/DOCK10/PDIK1L/ADAT2/THAP6/ZNF518A/GPM6A/FAM114A2/TDRD3/NIPSNAP3B/TSPAN12/ZDHHC21/NMBR/CNTN1/ERC2/DCUN1D4/LTN1/MMP16/S100PBP/CHIC1/FUT…
GSE32164_ALTERNATIVELY_ACT_M2_VS_CMYC_INHIBITED_MACROPHAGE_UP	C7_immunologic	196	0.41887	1.91854	5.72916e-07	2.58474e-05	3475	tags=23%, list=16%, signal=19%	TNFRSF4/RRAD/PRF1/CCL5/JCHAIN/CXCR3/ICAM1/MMP9/RELB/IGKC/LTB/CD28/SOAT2/DOK2/CD6/HBA2/ANXA1/APOE/PLIN2/CD79A/CSF1R/KLRG1/ELL2/MPEG1/RELL1/ID2/TAP1/ITGB2/IL18RAP/HLA-B/MAPKAPK2/CYBA/EIF4G2/IL4/CD82/ITM2C/SEPHS2/NABP1/RABAC1/EFNA2/HPN/RFLNB/IGHM/PPP4C/BCL7B
MIR548F_3P	C3_motif	474	-0.3437	-1.67904	5.79991e-07	2.61284e-05	4849	tags=32%, list=22%, signal=26%	IKBIP/DTD2/ELK4/TRUB1/PHC3/TRAPPC8/LEPROT/SCML1/ZBTB14/DIDO1/C3orf70/TRMT10A/ZBTB41/RAB27B/KLF9/ZNF148/BRWD3/LPP/TNRC18/HACE1/ZNF569/ZNF260/SMAD4/ZFX/PHIP/IKZF2/TBL1XR1/GNS/TRPM7/SPIN4/MAP7/N4BP2L1/VPS13C/NTN4/ZBTB44/MYEF2/ZNF264/ATXN3/POU4F1/ZFAND4/PCGF5/CLASP2/TGFBR3/CPNE3/MECP2/PIKFYVE/TRMT5/SERINC5/NHLRC2/GPAM/SCAI/USP33/LYRM7/BRWD1/TAOK1/GTF2IRD2/TMEM245/TMEM169/ZFPM2/STAM2/FAM149B1/ANGEL2/P…
MIR98_3P	C3_motif	709	-0.310504	-1.56851	5.88337e-07	2.64657e-05	4862	tags=32%, list=22%, signal=26%	KDM6A/DMTF1/PNISR/UTRN/ELK4/TASP1/PHC3/DACH1/ZNF506/ZBTB14/DCAF6/LGALSL/PRR12/SMARCA2/KRBOX4/ULK1/FNDC3A/MYCBP2/USP24/USP34/SRBD1/BRWD3/CUL1/DAAM1/ARHGAP20/UBR1/PTMS/ZNF569/CPEB3/SEMA3C/TSHZ3/JAG2/DCAF7/RIMKLB/PHIP/NPY/TGFB3/PRPF38B/PAXBP1/IKZF2/ACTL6A/PAN3/HERC2/EIF4A2/TRPM7/GDAP2/SCAMP1/RNF24/AFF3/COG7/MEX3B/CREBZF/ARID1B/DYNC2LI1/PLCL2/HEATR5B/UBE3C/PIK3C2A/ALKBH8/REV3L/JAK2/NTN4/PPP4R3B/EIF4G…
WP_TCELL_ANTIGEN_RECEPTOR_TCR_SIGNALING_PATHWAY	C2_curated	89	0.528318	2.11831	5.92419e-07	2.66106e-05	2909	tags=33%, list=13%, signal=28%	TNFRSF9/CD83/IRF4/IL6/CD28/CD3E/ZAP70/NFKBIA/MAP3K8/LCK/RIPK2/GATA3/CD3D/PIK3R2/SH2B3/ICOS/REL/IL15RA/NFKB1/VIM/TGFB1/OPRM1/PRKCD/PIK3R1/CD8A/IL17A/ITK/FAS/LAT
MEISSNER_NPC_HCP_WITH_H3K4ME2_AND_H3K27ME3	C2_curated	347	0.360004	1.75211	5.95573e-07	2.67134e-05	4162	tags=37%, list=19%, signal=31%	MSC/GNG4/B3GNT7/PHLDA2/TESC/CLCF1/CITED4/WNT1/PROK2/EMX1/KCNQ2/PLD5/TBX21/WNT9A/SORCS3/MSX2/GALNT14/SPTBN2/TRNP1/SOWAHB/SEMA7A/FEV/PLPPR3/OVOL1/LHX6/SCUBE1/PRR16/SCN4B/CADPS/RAB11FIP1/SLC6A17/SYT12/RERG/PODN/SHISA6/LHX8/KCNS2/PDGFB/BNC2/COL13A1/UTF1/PPP2R2C/KCNS3/PGBD5/JPH3/INSM2/HRH3/CRABP1/HCN1/NOTUM/AHNAK/RASGEF1C/CDH11/FFAR4/ZNF296/PLK5/AHR/PTPRT/SCN5A/DSCAM/LAMA1/HTR7/SYNDIG1L/KCNA7/HCN2/BMP…
GO_VASCULATURE_DEVELOPMENT	C5_GO	696	0.300334	1.5559	5.97888e-07	2.67783e-05	3514	tags=23%, list=16%, signal=20%	TNF/ADM/PDE3B/CXCL8/WT1/LIF/PTPN14/CXCL10/THBS1/NFATC4/PDGFA/TNFRSF12A/HAS2/CXCR3/LGALS12/ADGRA2/HLA-G/FOXC1/F3/NGFR/COL1A2/IL6/FZD8/PROK2/CCL2/HOXA1/SERPINE1/LDLR/ZC3H12A/SEMA6A/HPGD/PLCD3/MMP19/TWIST1/GPER1/STRA6/TNFAIP3/CYP1B1/ANXA1/LEF1/APOE/JUNB/SH2D2A/PTGS2/SHH/STAT1/KLF2/ITGAX/WNT11/SPRY2/PRKCA/SAT1/VEGFA/RAMP1/CYBB/SERPINF1/C5AR1/FOSL1/CHI3L1/EGR3/MCAM/PLK2/RHOB/S1PR1/PRDM1/HMOX1/PPP1R16B…
SAGIV_CD24_TARGETS_DN	C2_curated	44	0.642218	2.267	6.01575e-07	2.69043e-05	1682	tags=39%, list=8%, signal=36%	CXCL8/DUSP5/THBS1/ICAM1/OASL/RELB/PLAU/ATF3/CHAC1/N4BP3/CDKN1A/ULBP2/MCAM/EMP3/PDGFB/CABP1/GEM
MIR548A_3P	C3_motif	471	-0.341992	-1.671	6.09566e-07	2.72158e-05	4849	tags=32%, list=22%, signal=26%	IKBIP/DTD2/ELK4/TRUB1/PHC3/TRAPPC8/LEPROT/SCML1/ZBTB14/DIDO1/C3orf70/TRMT10A/ZBTB41/RAB27B/KLF9/ZNF148/BRWD3/LPP/TNRC18/HACE1/ZNF569/ZNF260/SMAD4/ZFX/PHIP/IKZF2/TBL1XR1/GNS/TRPM7/SPIN4/MAP7/N4BP2L1/VPS13C/NTN4/ZBTB44/MYEF2/ZNF264/ATXN3/POU4F1/ZFAND4/PCGF5/CLASP2/TGFBR3/CPNE3/MECP2/TRMT5/SERINC5/NHLRC2/GPAM/SCAI/USP33/LYRM7/BRWD1/TAOK1/GTF2IRD2/TMEM245/TMEM169/ZFPM2/STAM2/FAM149B1/ANGEL2/PIK3CB/SP…
GSE17721_CTRL_VS_POLYIC_2H_BMDC_DN	C7_immunologic	199	0.417783	1.91571	6.10303e-07	2.72158e-05	2023	tags=21%, list=9%, signal=19%	PTX3/INHBA/CSF1/GPR84/ICAM1/CLCF1/HCAR2/DLX2/KCNH2/NINJ1/IER5/HBA2/JUNB/CDKN1A/SHROOM3/CXCL11/FOXB1/GCH1/C5AR1/EGR3/PELI1/UGT8/AREG/GABRD/PRDM1/MARCKSL1/GHRL/IER2/FIGN/ELL2/CST7/TRPM5/TEX43/ID2/TNFAIP6/MIDN/PLK4/TM6SF2/HES2/PXMP2/PCDHAC1
GSE28737_FOLLICULAR_VS_MARGINAL_ZONE_BCELL_BCL6_HET_DN	C7_immunologic	191	0.415901	1.89633	6.21997e-07	2.76621e-05	3325	tags=28%, list=15%, signal=24%	HBG2/GPR84/IL2RA/TREM1/RAB20/PLXNA1/DLX2/RASL11A/SLFN12L/CD69/FHDC1/ZBTB32/PPP1R14C/STRIP2/MCAM/PLK2/FPR1/SPON1/CDKN2B/CH25H/PLA2G2F/BNC2/GADD45A/IRF1/FCGR3A/RD3/PPP2R2C/CEBPB/MFSD2A/INSM2/TSPOAP1/TLCD1/TAP1/CDH22/SPO11/NRP2/IFITM5/INSM1/IRF7/SAMHD1/BARHL1/VWC2L/LSAMP/TUBB2B/PPP1R15B/DAO/TXN/ART5/TXNDC17/SPATA2/EFNA2/UBE2L6/MXD1/SLC1A7
HAN_JNK_SINGALING_UP	C2_curated	34	0.69	2.29308	6.22105e-07	2.76621e-05	3213	tags=41%, list=15%, signal=35%	CD276/CCL5/CXCL10/IL1RL1/SGK1/ISG15/SOX4/PLEKHO1/IFIT3/IRGM/TNC/USP18/LOX/SHOX2
MIR548E_3P	C3_motif	472	-0.346365	-1.69359	6.23597e-07	2.76886e-05	4849	tags=33%, list=22%, signal=26%	IKBIP/DTD2/ELK4/TRUB1/PHC3/TRAPPC8/LEPROT/SCML1/ZBTB14/DIDO1/C3orf70/TRMT10A/ZBTB41/RAB27B/KLF9/ZNF148/BRWD3/LPP/TNRC18/HACE1/ZNF569/ZNF260/SMAD4/ZFX/PHIP/IKZF2/ZZZ3/TBL1XR1/GNS/TRPM7/SPIN4/MAP7/N4BP2L1/VPS13C/NTN4/ZBTB44/MYEF2/ZNF264/ATXN3/POU4F1/ZFAND4/PCGF5/CLASP2/TGFBR3/CPNE3/MECP2/PIKFYVE/TRMT5/SERINC5/NHLRC2/GPAM/SCAI/USP33/LYRM7/BRWD1/TAOK1/GTF2IRD2/TMEM245/TMEM169/ZFPM2/STAM2/FAM149B1/ANG…
GSE35685_CD34POS_CD38NEG_VS_CD34POS_CD10POS_BONE_MARROW_DN	C7_immunologic	196	0.418084	1.91494	6.27049e-07	2.78019e-05	2145	tags=22%, list=10%, signal=20%	EIF1AY/IRF8/TNFSF9/CXCL10/CCL4/IER3/BCL3/CD83/CEBPD/CCL2/GADD45G/SOCS1/MT2A/ISG15/TIMP1/NFKBIA/MAP3K8/CDKN2D/SERTAD1/FOXB1/GBP2/GCH1/CCR1/PELI1/CH25H/GBP7/ZFP36/GADD45A/IRF1/FCGR1A/AHR/RNF19B/MIDN/TAP1/VMP1/UBALD2/IRGM/IFIT2/NFKB1/PIM1/TIPARP/MT1E/GUCA1A
GO_SENSORY_ORGAN_DEVELOPMENT	C5_GO	572	0.310742	1.59246	6.4089e-07	2.83748e-05	3495	tags=26%, list=16%, signal=22%	ROR2/INHBA/WT1/NTN1/ROR1/FOXC1/FBN2/CYP1A1/ECE1/CEBPD/DLX2/WNT10B/SDC4/WNT1/HOXA1/PAX8/PBX4/TSKU/PHOX2B/NINJ1/OSR2/ACHE/NR4A3/TWIST1/ESRP1/STRA6/EPHA4/CYP1B1/LEF1/DCX/WNT9A/SHH/CRYAB/SOX8/CNTF/EFEMP1/MAFB/NOX3/SPRY2/IGFN1/GATA3/OLFM3/OTX1/RDH10/VEGFA/SLC44A4/SERPINF1/TRPM1/RPE65/GABRB2/WNT10A/CRYBB1/SIX3/PRDM1/SLC17A7/SPRY1/RARA/SH3PXD2B/PITX3/LHX1/BDNF/RPGRIP1/BNC2/PDE6C/OPN5/SIX1/CC2D2A/RD3/NEC…
GSE9988_LPS_VS_LPS_AND_ANTI_TREM1_MONOCYTE_DN	C7_immunologic	187	0.421173	1.91725	6.65971e-07	2.9443e-05	2204	tags=24%, list=10%, signal=21%	RRAD/NRIP3/CSF1/TNFRSF12A/SPP1/TRIB1/SOWAHC/SH3BP5/SGK1/ATF3/SERPINE1/S1PR3/MIR22HG/MMP19/BAG3/HAVCR2/CRTAM/UPP1/HES4/ITGAX/IL36RN/SPRY2/BHLHE40/OLIG2/FOSL1/CCR1/CD68/RHOB/NEU1/NRARP/CDC42EP3/RNASEK/EDN1/CEBPB/PLEKHO1/VMP1/SLC3A2/GEM/RGS1/DTL/DDIT3/ZNF674-AS1/AKIRIN2/ZBTB43
CHAUHAN_RESPONSE_TO_METHOXYESTRADIOL_DN	C2_curated	99	0.506174	2.08531	6.80406e-07	2.99952e-05	5486	tags=43%, list=25%, signal=33%	CCL3/ADM/LGALS1/MARCKS/HLA-G/TUBB2A/S100A10/PDLIM1/IL2RG/TNFAIP3/CD48/TRBC2/LSP1/UBC/PIM2/TMSB4X/VIM/SLC25A6/BTG2/UBE2S/HERPUD1/COX6A1/TMSB10/GGT1/IDH2/GNAS/HSP90B1/DDOST/UBE2J1/BTG1/PKM/CAPNS1/B2M/TAPBP/PTPN6/COPE/SPCS2/PGK1/SEC61G/HSP90AB1/PHB2/EIF3K/AP3S1
WIELAND_UP_BY_HBV_INFECTION	C2_curated	99	0.506214	2.08547	6.80406e-07	2.99952e-05	4452	tags=42%, list=20%, signal=34%	CCL5/CXCL10/IL10RA/RAB20/CD83/S100A10/RAB31/TYROBP/CD48/RGL1/STAT1/GBP1/FCER1G/GBP2/CD3D/IFI30/CXCL9/C3AR1/KPNA2/COTL1/PTTG1/FCGR1A/LPXN/CFL1/LGALS3/HLA-B/TYMS/ISG20/TRGC2/HLA-A/SLC7A7/LYZ/UBE2L6/RRM2/LAP3/UCP2/IGLC2/CD38/B2M/GPNMB/TAPBP/IGHG1
GO_MONOCYTE_CHEMOTAXIS	C5_GO	64	0.576303	2.19807	6.9258e-07	3.04884e-05	3074	tags=39%, list=14%, signal=34%	CCL3/CCL5/CXCL10/CCL4/IL6/CCL2/SERPINE1/S100A12/XCL1/TNFSF11/ANXA1/CCR1/FPR2/CCL3L3/CCL3L1/PDGFB/CCL22/CCL19/PLA2G7/SLIT2/LGALS3/CCL25/CCL18/CCL15/CXCL17
HAN_JNK_SINGALING_DN	C2_curated	38	0.660116	2.26325	6.93816e-07	3.04992e-05	3179	tags=47%, list=15%, signal=41%	CP/HAS2/COL6A2/CYP2F1/IFITM1/RGS2/COL6A1/ABCA1/SLC29A1/SOCS3/AHR/SPIB/LIFR/C3/LCN2/FAS/RBP1/GDF10
GSE3920_IFNA_VS_IFNG_TREATED_ENDOTHELIAL_CELL_UP	C7_immunologic	163	0.435899	1.93849	7.08248e-07	3.10894e-05	2098	tags=20%, list=10%, signal=18%	DUSP8/TNFRSF18/CXCL10/DDX3Y/STAR/LAX1/RELB/PDE4A/ATF3/ZC3H12A/NR4A3/RND1/BAG3/DUSP10/TNFAIP3/SERTAD1/PITPNM1/VEGFA/GCH1/NFKBID/CSRNP1/ELL2/NR4A1/PLK3/HOMER1/TRAF1/SLC3A2/ARL5B/REL/BTG2/MAFF/SMAD7/FOSL2
BACH2_01	C3_motif	267	0.383256	1.81805	7.12721e-07	3.12413e-05	3004	tags=25%, list=14%, signal=22%	GPR3/HBEGF/FOXA1/PHLDA2/IL11/TNFRSF12A/PLEKHH3/TRIB1/MMP9/SGK1/PROK2/RASD1/MMP19/GADD45B/RGS2/CPA6/KBTBD8/CHST1/CDKN1A/SLC26A9/LMNA/SERTAD1/GRIA1/SFN/PRDM1/DYSF/RELL2/COL7A1/LDB3/SLC16A6/CSRNP1/DHRS3/ELMSAN1/GADD45A/S1PR2/PTPRN/NR4A1/CYTOR/FAM180A/CLIC1/ABI3/CLC/SLC4A11/ROM1/DNAJC5B/MAMDC2/DDIT3/PCSK1/LRRC15/PIM1/KCNA2/SHC3/RTN4/TAGLN2/GFAP/ZBTB43/CHMP4B/UCN2/CSF3/ATF4/VASP/ALDOA/GAPDH/SLC6A5/ENO…
GSE43955_10H_VS_30H_ACT_CD4_TCELL_WITH_TGFB_IL6_DN	C7_immunologic	194	0.417372	1.90458	7.34102e-07	3.21328e-05	3032	tags=22%, list=14%, signal=19%	ROR2/IRF8/HBEGF/PHLDA1/PHLDA2/HIC1/LTA/IL12RB1/SOAT2/HPGD/KCNQ2/TENM1/COL6A1/SERPINB2/EFNA5/ANXA1/ALAS2/BHLHE40/CCR1/PLK2/IER2/BASP1/SULT2B1/NQO1/CHRNB2/SAG/IRF1/MYH4/DDIT4/MSX1/AK1/SYT6/EIF1B/C16orf89/SLC1A2/ISLR/FABP5/SLC10A3/ITGAE/CYTIP/TUBB3/GSTM5
ZHANG_ANTIVIRAL_RESPONSE_TO_RIBAVIRIN_DN	C2_curated	45	0.640297	2.27148	7.47571e-07	3.2676e-05	2166	tags=40%, list=10%, signal=36%	CCL3/CCL4/TNFRSF9/CXCR3/TUBB2A/SERPINE1/IL2RG/RRAS2/DUSP10/CYP1B1/GATA3/PLK2/AXL/NCF2/AHR/GEM/TUBA4A/ATP2B1
MIR548BC	C3_motif	472	-0.344935	-1.6866	7.52095e-07	3.28273e-05	4849	tags=33%, list=22%, signal=26%	IKBIP/DTD2/ELK4/TRUB1/PHC3/TRAPPC8/LEPROT/SCML1/ZBTB14/DIDO1/C3orf70/TRMT10A/ZBTB41/RAB27B/KLF9/ZNF148/BRWD3/LPP/TNRC18/HACE1/ZNF569/ZNF260/SMAD4/ZFX/PHIP/IKZF2/TBL1XR1/GNS/TRPM7/SPIN4/MAP7/N4BP2L1/VPS13C/NTN4/ZBTB44/MYEF2/ZNF264/ATXN3/POU4F1/ZFAND4/PCGF5/CLASP2/TGFBR3/CPNE3/MECP2/PIKFYVE/TRMT5/SERINC5/NHLRC2/GPAM/SCAI/USP33/LYRM7/BRWD1/TAOK1/GTF2IRD2/TMEM245/TMEM169/ZFPM2/STAM2/FAM149B1/ANGEL2/P…
GSE45365_WT_VS_IFNAR_KO_CD8A_DC_DN	C7_immunologic	192	0.42131	1.91802	7.57225e-07	3.30045e-05	5414	tags=41%, list=25%, signal=31%	MSC/CXCL3/CCNA1/SNAI1/F3/ECE1/SSTR2/FBLN2/SDC4/CXCL2/IFITM1/NINJ1/LGALS3BP/NFKBIA/TNFAIP3/FUT5/GBP2/PELI1/MAP2K3/CASP5/FPR2/TNFAIP2/APOA1/ELL2/EBI3/PDGFB/LRP12/CTSV/SLC2A6/NECTIN2/TNFRSF1B/PTGER4/PFKFB3/TAP1/REL/IL15RA/TIGAR/AKIRIN1/IRF7/ELF4/TRPV6/MAD2L1BP/TP53AIP1/PDE4B/CSF3/LILRB1/TLR2/GTF2B/ATAD3A/TICAM1/UBE2L6/MXD1/SNRPB/ARID5A/TNIP1/CD80/EHD1/EIF1/POMP/SLC43A3/RASSF4/SPHK1/RAB8B/CCDC40/SPEF…
GSE9006_TYPE_1_DIABETES_AT_DX_VS_1MONTH_POST_DX_PBMC_UP	C7_immunologic	196	0.415927	1.90506	7.71403e-07	3.35751e-05	5840	tags=37%, list=27%, signal=27%	PTX3/HBEGF/MARCKS/IER3/STX11/IGKC/CCL2/SOCS1/HLX/DUSP10/MAP3K8/JUNB/KLF2/PPIF/MAFB/CYBB/FCAR/MARCKSL1/FPR2/THBD/GPR132/IFIT3/SOCS3/TUBA4B/DDIT4/PIM1/UBE2S/CDT1/HERPUD1/ZFP36L1/NRAS/CYBA/HSPA5/ALDOA/ACTG1/TSC22D3/NT5DC2/MAPRE1/PFN1/HMGB2/P4HB/CDCA4/RABAC1/PPP4C/NFE2L2/HSP90B1/AHCY/PDIA3/RBM3/BTG1/PPIB/GLUD2/GLUL/RPN1/BSG/TMEM160/UQCRC1/GPI/NCAPH2/GSR/PSMC3/GLUD1/WDR18/PUF60/CTSD/ANP32A/RAB1B/CDC37…
AMIT_EGF_RESPONSE_60_MCF10A	C2_curated	37	0.674316	2.29176	7.83186e-07	3.40399e-05	1518	tags=46%, list=7%, signal=43%	CXCL8/INHBA/IER3/TRIB1/SOWAHC/IL6/CXCL2/ZC3H12A/TNFAIP3/JUNB/PTGS2/BHLHE40/PLK2/IER2/GADD45A/HES1/PTGER4
MODULE_375	C4_computational	89	0.525541	2.10717	7.88404e-07	3.41798e-05	2359	tags=30%, list=11%, signal=27%	CCL3/CXCL8/CXCL1/HCAR3/GPR183/CXCL2/ADRA2B/GHRHR/GABRA2/GPR65/C5AR1/CCR1/FPR1/CXCL9/FPR2/C3AR1/NTSR1/GNA15/OPRK1/ACKR1/HCRTR1/GCG/GRM3/BDKRB2/RGR/P2RY14/CCR8
MIR5688	C3_motif	774	-0.304379	-1.55118	7.88619e-07	3.41798e-05	4315	tags=26%, list=20%, signal=22%	RIMKLB/CMTM4/MBTD1/KHDRBS3/TAF1/PRKD3/ERCC6L2/PRPF38B/SATB2/HDAC9/MLEC/TBL1XR1/RASGRF2/ZBTB37/SPIN4/SENP6/OCRL/NOTCH2/CREBZF/NRXN1/GAB1/BROX/OTUD7B/ATP8A1/NTN4/PPP4R3B/EIF4G3/MYEF2/ZNF264/CPSF2/DCAF17/TESMIN/SEL1L/ARHGAP5/KDM4A/PROM2/CADM1/TMEM170B/PLAG1/LRMP/EEF2K/NFATC2/CLOCK/LRP6/ARHGAP28/TEAD2/POU2F1/PRKAG2/TRIQK/VPS13D/TGFBR3/CCSER1/MID2/SLC35B4/NAPB/TFAP4/ALG10B/SAMD4A/LNPK/SCN2A/ZMYND11/SC…
LIANG_SILENCED_BY_METHYLATION_2	C2_curated	53	0.598769	2.19999	7.92492e-07	3.42995e-05	3944	tags=49%, list=18%, signal=40%	INHBA/CCL5/HBEGF/ICAM1/IL6/CXCL2/SERPINB2/TNFAIP3/PTGS2/CSF2/STAT1/AREG/THBD/NT5E/IFIT3/IFI6/IFIT2/C1S/IRF7/C3/LCN2/GAGE1/MX1/STC1/BIK/IL13RA2
REACTOME_OLFACTORY_SIGNALING_PATHWAY	C2_curated	366	0.351548	1.72581	7.99819e-07	3.45681e-05	9376	tags=66%, list=43%, signal=38%	RTP5/OR2H1/OR7D2/OR51S1/OR6V1/OR1E2/OR2A2/RTP2/OR8S1/OR13G1/OR52N1/OR52E8/OR13A1/OR5B2/OR4D6/OR5T2/OR10W1/OR51G2/OR7A5/OR6C70/OR2AE1/OR5B17/OR11H6/OR52I2/OR51T1/OR2A5/OR9A4/OR7G1/OR51E2/OR2T10/OR5D18/OR2V2/OR5H2/OR4C3/OR8K5/OR10G7/OR2AJ1/OR6C68/OR52A5/OR8D1/OR56B4/OR52N2/OR6C74/OR2K2/OR51I2/OR7C2/GNB1/OR10A2/OR52I1/OR5B12/OR1K1/OR6C76/OR10A7/OR2AP1/OR4D2/OR1F1/OR4K17/OR2F2/REEP2/OR8J3/OR4B1/OR7G2…
GSE21546_ELK1_KO_VS_SAP1A_KO_AND_ELK1_KO_ANTI_CD3_STIM_DP_THYMOCYTES_DN	C7_immunologic	193	0.414397	1.88904	8.03599e-07	3.46829e-05	5863	tags=39%, list=27%, signal=29%	DUSP8/ZNF703/CXCL3/SPRY4/DUSP2/IL10RA/CREB5/GADD45B/BCL6/BAG3/TNFAIP3/UPP1/RCVRN/SPRY2/SERPINB12/PLK2/AREG/PAK6/NFKBID/CSRNP1/PGF/SLC1A1/EFHD2/TNFRSF1B/NR4A1/ARL4D/KRT72/ARL5B/GEM/FIBCD1/PIM1/SLC30A1/TAGLN2/NGEF/HSPE1/CENPU/CDC25A/MAPKAPK2/TMEM200A/SNPH/CCDC71L/TFB2M/KCNJ6/FBXO34/ARL8B/NMT2/EGR1/DYRK2/C16orf72/ZNF367/GUSB/ETS1/ELFN1/SCGN/SH3BP2/SARAF/BMP5/SQSTM1/DPCD/PDXP/LY6D/RGS16/ZFAND2A/UBAP1…
MODULE_24	C4_computational	447	0.33091	1.65384	8.12913e-07	3.50089e-05	2112	tags=20%, list=10%, signal=18%	ADM/GSTM1/PHLDA2/TCF7/IL1RN/SPP1/FBN2/IER3/TRIB1/SERPINA1/COL6A2/COL1A2/S100A9/CNN3/SERPINE1/GADD45G/LDLR/MPO/HPGD/PRG2/PEG10/DLK1/S100A8/F12/SLC2A3/RND1/COL6A1/HAP1/CCND1/SLC6A8/PRTN3/APOE/JUNB/PLIN2/GC/ALAS2/FXYD2/VEGFA/GCH1/ITIH2/APOC1/RHOB/RBM38/HMOX1/ABCA1/MAP2K3/CDC42EP1/ITGB5/SLC29A1/TRPM2/HSPA6/DHRS3/APOA1/DSP/ELL2/CST7/ETS2/NECTIN2/PTP4A1/PCLAF/VSNL1/TNFRSF1B/PLA2G2A/PIM2/PTTG1/PLK3/MT1G…
GO_OSTEOBLAST_DIFFERENTIATION	C5_GO	211	0.405136	1.87859	8.13421e-07	3.50089e-05	3801	tags=32%, list=17%, signal=27%	TNF/CCL3/NPPC/SNAI1/SPP1/FBN2/IL6/CEBPD/WNT10B/IFITM1/PTHLH/ACHE/TWIST1/CYP24A1/COL6A1/RRAS2/MRC2/LEF1/JUNB/MSX2/SHH/SOX8/SEMA7A/WNT11/AREG/PTH1R/SH3PXD2B/BMP3/NELL1/MYOC/RANBP3L/CEBPB/AXIN2/DHH/SOX2/ID2/FFAR4/IGF1/CLIC1/LRP3/SOX9/CTHRC1/WNT4/IGFBP5/HSPE1/TPM4/SP7/GLI2/ATF4/TNC/LOX/NOCT/RSPO2/HAND2/GDF10/SHOX2/FGF9/CREB3L1/ALPL/CEBPA/BMP7/SMAD6/GNAS/GTPBP4/IGF2/FASN/CITED1/SFRP2
GSE17974_0H_VS_1H_IN_VITRO_ACT_CD4_TCELL_DN	C7_immunologic	192	0.420453	1.91411	8.21474e-07	3.53062e-05	1985	tags=20%, list=9%, signal=18%	TNF/TNFSF9/EGR4/LIF/NRIP3/PHLDA1/DUSP2/GPR183/IL23A/IRF4/LTA/DUSP4/EGR2/BCL2A1/NR4A3/GADD45B/IER5/RRAS2/KBTBD8/SH2D2A/GPR65/SERTAD1/SPRY1/IER2/NFKBID/MIR3142HG/NLRP3/KPNA2/ICOS/NR4A1/PFKFB3/CLDN1/GEM/TMEM88/CCDC148/NAB2/SIPA1L1/BTG2
GO_SECRETORY_GRANULE	C5_GO	844	0.284905	1.49866	8.30764e-07	3.56095e-05	4689	tags=28%, list=22%, signal=23%	PTX3/CXCL1/STX1A/NPPC/ARC/THBS1/GPR84/ASTL/PDGFA/RETN/MMP9/SERPINA1/ECE1/PLAU/TRH/FCN1/S100A9/CD177/SERPINE1/MPO/S100A12/EPX/GHRHR/PRG2/S100A8/LGALS3BP/SLC2A3/RAB31/TIMP1/TYROBP/PLAUR/PRTN3/MCEMP1/PCDH7/S100P/CRISPLD2/ITGAX/LY6K/FGR/SERPINB12/GAL/FCER1G/VEGFA/CYBB/BMF/C5AR1/ADGRE5/FCGR2A/CHI3L1/CD68/AZU1/CHIT1/TCN1/FCAR/CADPS/FPR1/GHRL/BPI/SIGLEC14/MS4A3/FPR2/C3AR1/CD33/ACTN2/NEU1/CLEC4D/LILRB3/B…
GSE45365_NK_CELL_VS_BCELL_UP	C7_immunologic	193	0.414026	1.88735	8.30839e-07	3.56095e-05	2712	tags=23%, list=12%, signal=21%	RRAD/CXCL3/LIF/ARC/THBS1/PHLDA1/ICAM1/SPP1/CD83/HAS1/IL6/ATF3/SERPINE1/LDLR/S100A8/RGS2/RND1/IER5/TNFAIP3/JUNB/JDP2/FOSL1/EGR3/IER2/CH25H/NFKBID/SLC7A5/CSRNP1/BIRC3/ZFP36/THBD/CDH11/RNF19B/TNFAIP6/ARL5B/GEM/B3GNT2/C19orf33/ENC1/OSGIN2/SDE2/MOB3A/MAPK6/VASP/HSP90AA1
GSE25087_FETAL_VS_ADULT_TCONV_DN	C7_immunologic	180	-0.44666	-1.96622	8.39252e-07	3.58952e-05	4997	tags=43%, list=23%, signal=34%	LENG8/SNX1/RARS2/MSL3/NDRG2/ZNF483/TNRC6A/APH1B/PEX1/EID2B/KLF9/PBX3/EXOC1/ABHD14A/ACVR2A/PHIP/FBXO3/ZBTB37/MPHOSPH8/CWF19L2/GATAD1/CCDC84/MICA/COA5/MEGF6/IMMP2L/MID2/MALAT1/BCL9L/PPP1R3E/PURA/GABPB1-AS1/CXADR/DLG3/NOX5/VIPR1/CEP68/IGSF22/PATJ/NHLRC3/COQ10A/CHIC1/HELQ/HPSE/ALDH1B1/DLGAP1-AS1/MMP28/FAM210B/TSPO/PATL2/LINC02035/CD40/ZNF559/MED31/FAM133A/LINC00921/CTSF/STRC/NPHP3/ZNF662/TNFAIP8L2/PF…
GSE21670_STAT3_KO_VS_WT_CD4_TCELL_DN	C7_immunologic	192	0.420236	1.91313	8.39831e-07	3.58952e-05	3840	tags=26%, list=18%, signal=21%	CCL3/CXCL8/CXCL1/CXCL3/CD7/CSF1/IL2RA/TNFRSF9/TFPI2/IL21R/IRF4/IL6/CCL2/RASL11A/SOCS1/BCL6/JUNB/UPP1/RNF157/BHLHE40/ADTRP/SLC7A5/SOCS3/FURIN/ICOS/PIM2/NDFIP2/ID2/UBALD2/SLC26A11/PIM1/MEOX1/C1QBP/ITK/C3/HIF1A/PDK1/ENO1/CYTIP/SRM/NABP1/CXCL13/CYSLTR2/ARID5A/STK17B/GTPBP4/CCL1/CYLD/RANBP1
MISSIAGLIA_REGULATED_BY_METHYLATION_UP	C2_curated	122	0.470326	2.01244	8.54288e-07	3.64608e-05	1652	tags=24%, list=8%, signal=22%	DUSP5/TFPI2/IL23A/SDC4/ATF3/SERPINE1/MIR22HG/ISG15/TIMP1/PLAUR/SLC6A8/TNFAIP3/CDKN1A/S100P/PTGS2/STAT1/SAT1/AREG/RBM38/MAP2K3/LY6E/TNFAIP2/NEU1/BIRC3/GADD45A/EVX2/ST3GAL5/TAP1/MAP1LC3B
HAY_BONE_MARROW_CD34_POS_EO_B_MAST	C8_cellSignature	18	0.804529	2.28783	8.55426e-07	3.64608e-05	1722	tags=61%, list=8%, signal=56%	TPSB2/HDC/TPSAB1/HPGD/EPX/PRG2/HPGDS/NOX3/MS4A3/ADCYAP1/CLC
REACTOME_SRP_DEPENDENT_COTRANSLATIONAL_PROTEIN_TARGETING_TO_MEMBRANE	C2_curated	113	0.487401	2.06515	8.59205e-07	3.65713e-05	9222	tags=76%, list=42%, signal=44%	RPS4Y1/RPS4Y2/RPL3L/SEC61B/RPS16/DDOST/SRP19/RPS2/RPS17/FAU/SRP14/SSR4/RPLP2/RPL28/RPN1/RPL37A/RPS27A/SEC11A/RPS26/RPL23A/RPL29/RPLP1/RPL6/SPCS2/RPS15/RPL26/SEC61G/RPL19/UBA52/RPL14/RPS5/RPL36AL/RPL4/RPN2/RPL27/RPS8/RPS27L/SPCS1/RPS7/RPL8/RPS19/RPL13A/RPS12/RPS11/RPL24/RPS9/RPL37/RPL18/RPL7A/RPL10A/RPL23/RPL7/RPL27A/RPS10/RPS14/RPS13/RPS29/RPL22L1/RPL17/SPCS3/SRP72/RPL35/RPL38/RPL32/RPS15A/RPS20/…
GO_MYELOID_CELL_DIFFERENTIATION	C5_GO	391	0.34404	1.69703	8.69959e-07	3.69564e-05	2855	tags=19%, list=13%, signal=17%	ROR2/TNF/CCL3/IRF8/INHBA/LIF/THBS1/CSF1/IL11/TESC/TRIB1/MMP9/GPR183/IL23A/RELB/IRF4/CCR7/NR4A3/ISG15/TNFSF11/BCL6/TYROBP/NFKBIA/PRTN3/IL34/LEF1/JUNB/CSF2/STAT1/KLF2/MAFB/ALAS2/GATA3/FCER1G/PRKCA/VEGFA/CCR1/RARA/CDKN2B/CSF1R/TSPAN2/LILRB3/ZFP36/SH2B3/CEBPB/RASGRP4/ANXA2/IL25/ID2/MT1G/MB/RARG/LILRB4/CCL19/TGFB1/LGALS3/ZFP36L1/CARTPT/IRF7/PIK3R1/KITLG/CSF3/ALAS1/IL17A/JMJD6/LILRB1/IL4/TLR2/NME1/HIF1…
GSE9006_HEALTHY_VS_TYPE_1_DIABETES_PBMC_4MONTH_POST_DX_UP	C7_immunologic	196	0.414728	1.89957	8.70646e-07	3.69564e-05	8372	tags=54%, list=39%, signal=34%	DUSP5/MARCKS/G0S2/ATF3/CD69/GADD45B/SLC2A3/IER5/DUSP10/NFKBIA/TNFAIP3/NFKBIE/JUNB/BHLHE40/CYBB/SFN/NFKB2/IRF1/PTP4A1/COTL1/RAP2C/RNF19B/ADNP2/DDIT4/FAM53C/AKIRIN1/MAFF/PIK3R1/ATF4/ALDOA/CKAP4/HIF1A/ACTG1/RIOK3/TSC22D3/MAPRE1/ASMTL/TYMP/RNF11/STK17B/PIGA/CLP1/AHCY/LAP3/PDIA3/RBM3/RNASEH1/VDAC1/GLUD2/C8orf33/PLIN3/STRAP/GLUL/DDX21/RPN1/MSN/UQCRC1/LYPLA1/GPI/SNF8/EIF4H/TOB1/TAP2/TMED2/SUCLG2/GLUD1/C…
LAKE_ADULT_KIDNEY_C21_COLLECTING_DUCT_INTERCALATED_CELLS_TYPE_B	C8_cellSignature	101	-0.514455	-2.08727	8.72224e-07	3.69725e-05	3494	tags=34%, list=16%, signal=28%	PSD3/ATP6V0D2/TBL1X/SDCCAG8/MSI2/GAREM1/SNTB1/SSBP2/PHLDB2/SLC26A4/IQGAP2/RNF150/TBC1D4/MITF/ITGA6/ZBTB20/RNF152/MAP3K5/PARD3B/ARL15/MYRIP/PTPRJ/GPHN/WDR72/FREM1/L3MBTL4/RORA/MAGI3/KIF21A/LGR4/NR3C2/BMPR1B/SPTLC3/XIST
GO_OLFACTORY_RECEPTOR_ACTIVITY	C5_GO	352	0.353287	1.71844	8.76492e-07	3.71024e-05	9376	tags=66%, list=43%, signal=38%	OR2H1/OR7D2/OR51S1/OR6V1/OR1E2/OR2A2/OR8S1/OR13G1/OR52N1/OR52E8/OR13A1/OR5B2/OR4D6/OR5T2/OR10W1/OR51G2/OR7A5/OR6C70/OR2AE1/OR5B17/OR11H6/OR52I2/OR51T1/OR2A5/OR9A4/OR7G1/OR51E2/OR2T10/OR5D18/OR2V2/OR5H2/OR4C3/OR8K5/OR10G7/OR2AJ1/OR6C68/OR52A5/OR8D1/OR56B4/OR52N2/OR6C74/OR2K2/OR51I2/OR7C2/OR10A2/OR52I1/OR5B12/OR1K1/OR6C76/OR10A7/OR2AP1/OR4D2/OR1F1/OR4K17/OR2F2/OR8J3/OR4B1/OR7G2/OR5M3/OR8H2/OR14C36/…
GO_APOPTOTIC_SIGNALING_PATHWAY	C5_GO	588	0.307477	1.57594	8.80187e-07	3.72078e-05	3853	tags=24%, list=18%, signal=20%	TNF/INHBA/THBS1/NFATC4/HIC1/TNFRSF12A/LGALS12/G0S2/SNAI1/ICAM1/PMAIP1/CD70/MMP9/BCL3/NGFR/S100A9/ATF3/SERPINE1/CD28/CD3E/BCL2A1/S100A8/GPER1/CHAC1/TYROBP/BAG3/PLAUR/ERBB3/TNFAIP3/CYP1B1/LCK/CDKN1A/PTGS2/CDKN2D/CD5/SHH/CSF2/PPIF/LMNA/IL20RA/PRKCA/BMF/SFN/DAPL1/HMOX1/BCL2L14/CASP5/TNFRSF10C/NGF/BDNF/CD27/E2F1/TICAM2/BCL2L12/CEBPB/TNFRSF1B/IFI6/FGFR1/IGF1/ITPRIP/TRAF1/FAIM2/TNFRSF25/DAB2IP/DDIT4/MSX…
GSE30971_CTRL_VS_LPS_STIM_MACROPHAGE_WBP7_KO_4H_UP	C7_immunologic	192	0.4199	1.9116	8.85723e-07	3.73906e-05	2706	tags=28%, list=12%, signal=24%	TNF/PTX3/PHLDA2/IL2RA/TNFRSF9/F3/IER3/HAS1/IL6/AQP9/GFPT2/ZC3H12A/BCL2A1/SOCS1/GADD45B/SLC2A3/IER5/NFKBIA/MCEMP1/UPP1/PTGS2/KCNJ2/STRIP2/SLAMF1/ABCA1/BASP1/FPR2/CDC42EP3/ELL2/ETS2/FERMT2/MFSD2A/CEMIP/SOCS3/TNFRSF1B/HES1/PAPSS2/PFKFB3/TNFAIP6/MET/PIM1/OSGIN2/ZBTB43/IL10/CSF3/TMEFF1/EIF1B/ACOD1/SLC1A2/CPM/CCL18/MIR3945HG/ZBTB10
MODULE_12	C4_computational	350	0.353766	1.7218	8.91459e-07	3.75814e-05	2904	tags=29%, list=13%, signal=25%	ADM/PTX3/CXCL8/CXCL1/GSTM1/FEZ1/MYRF/G0S2/SPP1/F3/FBN2/COL6A2/NGFR/COL1A2/IL6/HSPA2/CXCL2/CCL2/GFPT2/CNN3/SERPINE1/LDLR/PEG10/S100A8/ISG15/SLC2A3/RAB31/COL6A1/BCL6/CCND1/ERBB3/TNFAIP3/CYP1B1/ANXA1/APOE/JUNB/CDKN1A/CRYAB/DPYSL3/ALAS2/VEGFA/TRIB2/EEF1A2/APOC1/RHOB/UGT8/EMP3/NEBL/CDC42EP1/TNFAIP2/SGCE/DHRS3/DSP/IGFBP6/NOVA1/FERMT2/DAAM2/VSNL1/CRABP1/TNFRSF1B/NTRK2/HES1/NR4A1/NCAN/FGFR1/ST3GAL5/ITM2A…
GO_TASTE_RECEPTOR_ACTIVITY	C5_GO	26	-0.752046	-2.33431	9.16344e-07	3.85777e-05	1852	tags=50%, list=9%, signal=46%	TAS1R3/TAS2R30/TAS2R46/TAS2R3/TAS2R10/TAS2R43/TAS2R4/TAS2R5/TAS2R13/TAS2R31/TAS2R20/TAS2R50/TAS2R14
SABATES_COLORECTAL_ADENOMA_UP	C2_curated	136	0.457757	1.9679	9.2406e-07	3.88496e-05	3944	tags=38%, list=18%, signal=31%	CXCL8/CXCL1/CXCL3/INHBA/ETV4/CXCL2/DUSP4/S100A8/CHAC1/DSG4/S100P/MSX2/CXCL11/AP1S3/CHI3L1/TCN1/CADPS/TNFRSF10C/NQO1/SLC7A5/GABRP/DPEP1/CEMIP/AXIN2/DGAT2/VSNL1/NOTUM/FAIM2/CLDN1/KLK10/DUOXA2/KRT6B/CCNO/TNS4/MSX1/PCSK1/GRHL1/S100A11/PTP4A3/ACSL6/LCN2/IRX3/MUC5AC/TBX3/SH3TC2/ALDH4A1/RRM2/DUOX2/MMP3/GRM8/IL13RA2
KEGG_NOD_LIKE_RECEPTOR_SIGNALING_PATHWAY	C2_curated	62	0.575721	2.17493	9.27139e-07	3.89259e-05	1813	tags=26%, list=8%, signal=24%	TNF/CXCL8/CXCL1/CCL5/IL6/CXCL2/CCL2/NFKBIA/TNFAIP3/RIPK2/CASP5/BIRC3/NLRP3/NFKBIB/CARD18/NFKB1
AIZARANI_LIVER_C10_MVECS_1	C8_cellSignature	261	-0.397529	-1.82974	9.35435e-07	3.92209e-05	2427	tags=26%, list=11%, signal=24%	PLAT/NES/NOTCH4/GALNT15/TCF4/ADGRF5/ID1/GNA11/TGM2/VWF/C7/ITGA6/PGM5/A2M/APOLD1/RPS6KA2/EMP2/HLA-DRB5/TM4SF1/CD300LG/MMRN1/TINAGL1/ARHGAP31/TSPAN18/TNS2/TMEM204/AQP1/ARL15/NOSTRIN/SHE/ERG/NOS3/GAS6/EPHB4/PLPP3/DLC1/NPDC1/ADGRL4/GRB10/KDR/ST6GALNAC3/PCDH12/TNS1/JAM2/COL4A1/CASKIN2/ADAMTS9/FZD4/PIK3R3/SNTB2/ROBO4/NFIA/CYYR1/EMCN/CLEC14A/INSR/AIF1L/CLEC3B/DNASE1L3/UACA/ADAMTS1/CHRM3/TEK/SHROOM4/LAMB…
GO_CELLULAR_DEFENSE_RESPONSE	C5_GO	52	0.620031	2.25799	9.51663e-07	3.98472e-05	2627	tags=40%, list=12%, signal=36%	PRF1/SH2D1A/HLA-G/TRAT1/LGALS3BP/TYROBP/C5AR1/KIR3DL2/FOSL1/CXCL9/KLRG1/LSP1/CCR9/NCF2/MNDA/KIR2DL4/DCDC2/LY96/CD300C/ITK/NCF1
MIR495_3P	C3_motif	692	-0.31312	-1.58257	9.69176e-07	4.04934e-05	4315	tags=26%, list=20%, signal=22%	RIMKLB/CMTM4/MBTD1/KHDRBS3/TAF1/PRKD3/ERCC6L2/SATB2/HDAC9/MLEC/TBL1XR1/RASGRF2/ZBTB37/SPIN4/SENP6/NOTCH2/CREBZF/NRXN1/GAB1/BROX/OTUD7B/PPP4R3B/EIF4G3/MYEF2/ZNF264/CPSF2/DCAF17/TESMIN/SEL1L/ARHGAP5/KDM4A/PROM2/CADM1/TMEM170B/PLAG1/LRMP/EEF2K/CLOCK/LRP6/ARHGAP28/TEAD2/POU2F1/PRKAG2/TRIQK/VPS13D/TGFBR3/CCSER1/MID2/NAPB/TFAP4/ALG10B/SAMD4A/LNPK/SCN2A/SCAI/TTC28/HIVEP2/MSI2/LCLAT1/SHPRH/RGS17/LRRC25/P…
BOQUEST_STEM_CELL_UP	C2_curated	257	0.389771	1.84195	9.69721e-07	4.04934e-05	3408	tags=32%, list=16%, signal=28%	PTX3/MSC/INHBA/LIF/PHLDA2/FEZ1/ROR1/GAS7/F3/COL6A2/HAS1/COL1A2/OLFML3/GFPT2/SDC2/SFRP4/PEG10/OSR2/TWIST1/BHLHE41/TENM1/TIMP1/COL6A1/MRC2/DCX/APOE/CRYAB/CRISPLD2/EFEMP1/MAFB/PAMR1/SERPINF1/PRR16/EMP3/ANK2/BASP1/MXRA5/KCND2/LAMA2/IRS1/FBLN5/SGCE/AXL/MYOC/IGFBP6/NT5E/NOVA1/CEBPB/NTRK2/CFD/PLA2G2A/DKK2/CDH11/MFAP4/HOXC6/DCN/IGF1/TNFAIP6/EGFR/MEG3/COL6A3/C1S/SOX9/PTGDS/SLIT2/COL3A1/TMEM176B/TNC/ITGA8/…
GO_MICROTUBULE_ORGANIZING_CENTER	C5_GO	761	-0.306684	-1.56138	9.8784e-07	4.11943e-05	5109	tags=34%, list=24%, signal=27%	PDCD6IP/CEP152/CENPJ/TSGA10IP/TUBGCP6/DYRK3/PDE4DIP/POC1B/EFHC2/CEP120/ABCA2/OFD1/TOGARAM1/LATS1/CEP192/CCDC92/AGBL4/SPECC1/HMBOX1/ACADS/CEP131/CEP128/BICDL1/DZIP1/SPDL1/RPGR/TTBK2/BBS4/ZFYVE19/FAM166A/NIN/TUBE1/CEP78/PCNT/NIT2/BBS1/CEP70/NLRC3/RTTN/CDK5RAP3/CCDC13/DAAM1/NUMA1/CCNB3/TNKS/SMAD4/RAB6C/WRN/TSGA10/CKAP2/MVB12A/ERCC6L2/HAUS3/HEPACAM2/SPICE1/TTLL5/B9D2/XRCC2/HERC2/FGFR1OP/CEP295/CRMP1/…
BACH1_01	C3_motif	258	0.380294	1.7972	1.00531e-06	4.18661e-05	3040	tags=26%, list=14%, signal=22%	GPR3/HBEGF/FOXA1/PHLDA2/IL11/IL1RN/TNFRSF12A/TRIB1/S100A10/SGK1/PROK2/RGS2/KBTBD8/PKP3/CHST1/CDKN1A/SLC26A9/LMNA/SERTAD1/EEF1A2/GRIA1/DYSF/RELL2/EMP3/COL7A1/CSRNP1/ELMSAN1/S1PR2/CYTOR/FAM180A/SYN1/HMGA1/ABI3/SLC4A11/ROM1/CFL2/DNAJC5B/ADGRG4/MAMDC2/DDIT3/LRRC15/PIM1/KCNA2/SHC3/C19orf33/RTN4/TAGLN2/GFAP/NRAS/FOXN1/GNAI1/CHMP4B/UCN2/CSF3/GTF2B/ALDOA/GAPDH/SLC6A5/ENO1/LY6G6C/PSMD7/SNPH/EN1/TLL1/KRT16…
LET_7F_1_3P	C3_motif	705	-0.308005	-1.55584	1.03555e-06	4.30314e-05	4862	tags=32%, list=22%, signal=25%	KDM6A/DMTF1/PNISR/UTRN/ELK4/TASP1/PHC3/DACH1/ZNF506/ZBTB14/DCAF6/LGALSL/PRR12/SMARCA2/KRBOX4/ULK1/FNDC3A/MYCBP2/USP24/USP34/SRBD1/BRWD3/CUL1/DAAM1/ARHGAP20/UBR1/PTMS/ZNF569/CPEB3/SEMA3C/TSHZ3/JAG2/DCAF7/RIMKLB/PHIP/NPY/TGFB3/PRPF38B/PAXBP1/IKZF2/ACTL6A/PAN3/HERC2/EIF4A2/TRPM7/GDAP2/SCAMP1/RNF24/AFF3/COG7/MEX3B/CREBZF/ARID1B/DYNC2LI1/PLCL2/HEATR5B/UBE3C/PIK3C2A/ALKBH8/REV3L/JAK2/NTN4/PPP4R3B/EIF4G…
MORF_G22P1	C4_computational	162	0.43893	1.95087	1.03608e-06	4.30314e-05	9276	tags=70%, list=43%, signal=40%	CLIC1/EIF4G2/HSP90AA1/PSMB1/EIF3C/YBX1/NUDT1/TUFM/SNRPB/UQCRFS1/COX4I1/YWHAQ/FAU/SRP14/PSMB3/HDGF/STRAP/HDAC1/NDUFS5/PCNA/SNRPD2/PSMD8/CSNK2B/COX5B/SET/EIF4H/PPM1G/SDHB/PRMT1/ELOC/KHDRBS1/SLC25A3/PGK1/RPL14/EIF3I/HSP90AB1/SNRPA/PHB2/NDUFV2/ANP32B/EIF3K/PUF60/SNRPE/PSMB7/CDV3/CDC37/DDX49/ILF2/SUMO3/ACP1/USP22/CCT7/SUMO2/JTB/XRCC6/MRPL23/PARK7/SRSF2/SRSF9/STARD7/HNRNPUL1/CDC123/HNRNPC/RPL24/TRIM28/…
BOQUEST_STEM_CELL_CULTURED_VS_FRESH_UP	C2_curated	415	0.334306	1.66534	1.0537e-06	4.37045e-05	3420	tags=29%, list=16%, signal=25%	CCL3/RRAD/CXCL8/CXCL1/CXCL3/INHBA/COL4A5/CXCL10/THBS1/HBEGF/GAS7/PMAIP1/TRIB1/OASL/CD83/FLNC/CXCL2/CCL2/ATF3/SERPINE1/GADD45G/IFITM1/GADD45B/TENM1/SLC2A3/RGS2/RND1/IER5/NFKBIA/MAP3K8/TNFAIP3/CYP1B1/GREM2/DCX/APOE/JUNB/CLEC2B/MAFB/SPRY2/BHLHE40/GBP2/SERPINF1/APOC1/CHI3L1/PELI1/RHOB/GPRC5A/SPRY1/KLF6/NOX4/ANK2/HBA1/ACTC1/NQO1/SLC7A5/HSPA6/ZFP36/SLC1A1/CDC42EP3/DSP/RAI2/NOVA1/ETS2/IRF1/CYP4B1/SOX4/K…
GSE557_WT_VS_CIITA_KO_DC_DN	C7_immunologic	193	0.412157	1.87883	1.06764e-06	4.42231e-05	2933	tags=23%, list=13%, signal=20%	DUSP8/ZNF703/DUSP5/FOXA1/HIC1/TRIB1/ITGB7/STX11/IL21R/IL2RB/SH3BP5/HSPA2/IGF2BP3/PACSIN1/PDLIM1/RGS2/TBX21/METRNL/CDKN2D/SERTAD1/RIPK2/JDP2/ARID3B/CHST7/ABCA1/EMP3/CTSV/PLEKHO1/RASGRP4/ANXA2/MYPN/SHB/GLIPR2/HEXIM1/CCL22/MYO1G/MTSS1/TMEM176B/PAX4/UBXN2A/CPM/CKAP4/ZBTB10/C15orf39/ITGAE
WP_MIRNAS_INVOLVEMENT_IN_THE_IMMUNE_RESPONSE_IN_SEPSIS	C2_curated	38	0.654884	2.24531	1.08268e-06	4.4786e-05	2697	tags=45%, list=12%, signal=39%	TNF/CCL3/CXCL8/CCL4/ICAM1/RELB/IL6/NFKBIA/NFKB2/IRF1/TLR7/REL/NFKB1/GZMB/IRF7/IL10/LCN2
GSE13485_CTRL_VS_DAY7_YF17D_VACCINE_PBMC_DN	C7_immunologic	198	0.411534	1.8872	1.09013e-06	4.5034e-05	2567	tags=23%, list=12%, signal=20%	CXCL10/IL1RN/MARCKS/IL4I1/OASL/GPBAR1/LDLR/KLHDC7B/IFITM1/MT2A/APOBEC3A/LGALS3BP/ISG15/ODF3B/CXCL11/RGL1/STAT1/GBP1/GCH1/FOSL1/CCR1/LY6E/CASP5/C3AR1/MSR1/AXL/NLRP3/OTOF/SLC12A8/IFIT3/IFI6/IFITM2/LINC00487/TAP1/IFIT2/IL15RA/EPSTI1/SLC31A2/MTHFD2/IRF7/TYMS/NEXN/ZBP1/CMPK2/LILRB1
GO_NEGATIVE_REGULATION_OF_PRODUCTION_OF_MIRNAS_INVOLVED_IN_GENE_SILENCING_BY_MIRNA	C5_GO	14	0.847612	2.23605	1.09489e-06	4.51701e-05	283	tags=29%, list=1%, signal=28%	LIN28B/TNF/IL6/ZC3H12A
SMID_BREAST_CANCER_BASAL_DN	C2_curated	678	-0.313596	-1.58386	1.12027e-06	4.61553e-05	2830	tags=20%, list=13%, signal=18%	SIGLEC15/FAM234B/STK32B/TRAF5/DZIP3/MAST4/LIAS/CILP/MMP17/IQGAP2/NPIPB3/CEACAM6/PATJ/IVD/JMJD7-PLA2G4B/ALB/EPOR/FBP1/PLAT/TRIM3/MAP3K12/DZANK1/CSAD/MUC6/ACADSB/PCSK5/ALG8/SEMA3B/IGF1R/UCN/PPIP5K1/CACNA2D2/MYB/PAN2/RAPGEF3/CLSTN2/INPP5J/ABAT/CX3CR1/APPBP2/C9orf106/ECM1/IKBKB/FRY/POLM/PNPLA4/REPS2/LRIG1/BCAS4/HEMK1/SERHL2/CROT/APBB2/GJA4/KRT8/ZMYND8/SLC24A1/THBS4/ERBB2/PCLO/RGS5/BMP4/GLRB/ACOX2/EPS…
SHIN_B_CELL_LYMPHOMA_CLUSTER_8	C2_curated	36	0.659474	2.21659	1.13112e-06	4.65402e-05	4496	tags=56%, list=21%, signal=44%	IL2RA/SNAI1/ICAM1/IL21R/TYROBP/NFKBIA/TNFRSF13C/STAT1/MAFB/SOX4/NFKBIB/ITGAM/SMAD7/FAS/GNAS/CD80/SPI1/CD38/CHEK1/HDAC1
GO_EXOCYTOSIS	C5_GO	894	0.281927	1.48885	1.14974e-06	4.72436e-05	2969	tags=20%, list=14%, signal=18%	CCL3/PTX3/CXCL1/STX1A/CCL5/THBS1/GPR84/PDGFA/RETN/BAIAP3/MMP9/STX11/SERPINA1/PLAU/FCN1/S100A9/SDC4/CD177/SERPINE1/MPO/SYTL3/S100A12/EPX/PRG2/S100A8/NR4A3/LGALS3BP/HCK/SLC2A3/RAB31/TIMP1/HAP1/TYROBP/PLAUR/PRTN3/MCEMP1/ANXA1/PCDH7/S100P/TTN/CRISPLD2/ITGAX/MILR1/FGR/SERPINB12/FCER1G/VEGFA/CYBB/C5AR1/RAB25/ADGRE5/FCGR2A/CHI3L1/CCR1/CD68/AZU1/CHIT1/TCN1/HMOX1/FCAR/CADPS/RAB11FIP1/FPR1/SYT12/BPI/SIGLEC…
AIZARANI_LIVER_C3_NK_NKT_CELLS_2	C8_cellSignature	155	0.441528	1.94582	1.15246e-06	4.72922e-05	4943	tags=37%, list=23%, signal=29%	CD96/PRF1/DUSP2/TCF7/P2RX5/LTB/ARL4C/TRAT1/CD3E/CD69/CD6/IL2RG/TNFAIP3/ANXA1/LCK/CD48/JUNB/GBP5/GATA3/ADGRE5/CD3D/PRDM1/CORO1A/KLRG1/TRBC2/PARP8/RUNX3/PTGER4/TMSB4X/IL18RAP/PAG1/HLA-B/CD8A/ITK/TSC22D3/CD52/CYTIP/RHOH/SLC38A1/LCP1/STK17B/TRAC/TAGAP/SLAMF6/RPS2/RPS17/BTG1/B2M/RPLP2/RPL28/ETS1/RPS27A/SARAF/RPS26/RPL23A/GPR171/RPLP1
WP_REGULATION_OF_TOLLLIKE_RECEPTOR_SIGNALING_PATHWAY	C2_curated	139	0.449565	1.94303	1.15731e-06	4.74282e-05	2637	tags=25%, list=12%, signal=22%	TNF/CCL3/CXCL8/CCL5/CXCL10/CCL4/TREM1/SPP1/IL6/SOCS1/NFKBIA/MAP3K8/TNFAIP3/CXCL11/IRAK2/STAT1/PELI1/CXCL9/MAP2K3/NFKB2/PIK3R2/TICAM2/TLR7/IFNA7/TLR9/MBL2/NFKB1/IRF7/IFNA10/PLK1/PIK3R1/IFNA5/LY96/TLR2/MAPK10
GSE37301_MULTIPOTENT_PROGENITOR_VS_LYMPHOID_PRIMED_MPP_DN	C7_immunologic	176	0.423218	1.90962	1.16467e-06	4.76412e-05	1985	tags=27%, list=9%, signal=24%	TNFRSF18/LIF/CCL5/ASB2/TNFRSF9/IL10RA/IL1RL1/PMAIP1/IER3/GPR183/ATF3/LDLR/ZC3H12A/XCL1/FAM107B/RGS2/TNFSF11/NFKBIA/ANXA1/TUBB6/CDKN1A/TOX2/GATA3/KCNK5/PPP1R16B/SLC16A6/KLRG1/ITGB5/ZFP36/DHRS3/ELL2/UTF1/ACOT7/CCR9/TIGIT/FURIN/ANXA2/LRRN4/AHNAK/ID2/NR4A1/PLK3/ARL5B/IL18RAP/HEXIM1/PCSK1/BTG2
GO_REGULATION_OF_MAP_KINASE_ACTIVITY	C5_GO	334	0.357536	1.73742	1.1656e-06	4.76412e-05	2377	tags=20%, list=11%, signal=18%	ROR2/TNF/DUSP8/DUSP5/THBS1/SPRY4/PDGFA/DUSP2/TRIB1/LAX1/FZD8/PROK2/GADD45G/DUSP4/S100A12/ADRA2B/NTRK1/GADD45B/TENM1/RGS2/TNFSF11/EPHA4/DUSP10/MAP3K8/IL34/APOE/IRAK2/RIPK2/SPRY2/EDN3/VEGFA/TRIB2/C5AR1/FPR1/SPRY1/GHRL/NOX4/MAP2K3/NGF/PDE6G/BIRC7/PDGFB/IGFBP6/GADD45A/UBC/S1PR2/EDN1/SH2B3/SPRED3/IQGAP1/FGFR1/IGF1/TLR9/EGFR/SHC2/DAB2IP/LAMTOR2/CBLC/CCL19/TGFB1/ADAM8/PRKCD/CARTPT/MAPKAPK2/MIF/FGF1/NTF3…
LET_7B_3P	C3_motif	705	-0.307188	-1.55171	1.19945e-06	4.89601e-05	4862	tags=31%, list=22%, signal=25%	KDM6A/DMTF1/PNISR/UTRN/ELK4/TASP1/PHC3/DACH1/ZNF506/ZBTB14/DCAF6/LGALSL/PRR12/SMARCA2/KRBOX4/ULK1/FNDC3A/MYCBP2/USP24/USP34/SRBD1/BRWD3/CUL1/DAAM1/ARHGAP20/UBR1/PTMS/ZNF569/CPEB3/SEMA3C/TSHZ3/JAG2/DCAF7/RIMKLB/PHIP/NPY/TGFB3/PRPF38B/PAXBP1/IKZF2/ACTL6A/PAN3/HERC2/EIF4A2/TRPM7/GDAP2/SCAMP1/RNF24/AFF3/COG7/MEX3B/CREBZF/ARID1B/DYNC2LI1/PLCL2/HEATR5B/UBE3C/PIK3C2A/ALKBH8/REV3L/JAK2/PPP4R3B/EIF4G3/KIA…
GSE360_L_DONOVANI_VS_M_TUBERCULOSIS_MAC_DN	C7_immunologic	197	0.413673	1.89763	1.20333e-06	4.90536e-05	3295	tags=25%, list=15%, signal=21%	TNF/RRAD/CXCL1/CXCL3/CCL5/CXCL10/HBEGF/PDGFA/PLAU/IL6/DUSP4/IFITM1/TWIST1/RGS2/KCNF1/RAB31/TNFAIP3/CDKN1A/SORCS3/PTGS2/GBP1/VEGFA/GBP2/GCH1/GRIA1/TNFAIP2/NFKB2/ZFP36/THBD/IRF1/CEMIP/TNFAIP6/IL15RA/CCL19/PPP1R13B/SMAD7/FOSL2/DSC1/ISG20/TLR2/NME1/CLCA2/TSC22D3/RIMS2/MLLT11/MX1/NR5A2/UBE2L6/CXCL13
TAKEDA_TARGETS_OF_NUP98_HOXA9_FUSION_6HR_DN	C2_curated	43	0.632331	2.23059	1.22844e-06	5.0011e-05	1996	tags=47%, list=9%, signal=42%	INHBA/CCL4/PDGFA/GAS7/HTRA3/CCL2/SERPINE1/NINJ1/IRAK2/TRIB2/CCR1/RHOB/HMOX1/RARA/CACNA1G/ZFP36/RGCC/TRAF1/MAMDC2/TNFSF8
GSE17721_LPS_VS_GARDIQUIMOD_1H_BMDC_UP	C7_immunologic	196	0.413389	1.89343	1.24216e-06	5.05029e-05	2931	tags=27%, list=13%, signal=23%	TNF/DUSP8/INHBA/CSF1/PHLDA1/DUSP2/F3/FBN2/CD83/ECE1/IL6/CXCL2/ACY3/ATF3/SLFN12L/EGR2/GADD45B/RGS2/TIMP1/SERPINB2/EPHA4/MRC2/PDE10A/ZFP42/SNTA1/SCUBE1/RHOB/IER2/PTGDR/DSP/EBI3/WFDC5/ACOT7/PRG3/CFD/NR4A1/HOXC6/PIWIL1/CLDN1/DUOXA2/CHRDL2/TNFSF8/ONECUT1/TMEM176B/TSPO2/CCR8/TNC/MPST/ADAMTSL5/LYNX1/TNP1/EBP
WANG_METHYLATED_IN_BREAST_CANCER	C2_curated	34	0.6809	2.26284	1.25035e-06	5.07693e-05	4371	tags=59%, list=20%, signal=47%	INHBA/THBS1/HBEGF/F3/UPP1/FOSL1/KLF6/SLC7A5/GADD45A/SLC3A2/CLC/ZYX/MAFF/ETV5/CDC25A/CAV1/TNFRSF10B/GJB3/SPHK1/TUBB
GSE12392_IFNAR_KO_VS_IFNB_KO_CD8_NEG_SPLEEN_DC_DN	C7_immunologic	198	0.409474	1.87775	1.27031e-06	5.1512e-05	3643	tags=29%, list=17%, signal=25%	RRAD/CXCL3/THBS1/EPS8/DUSP2/G0S2/IL6/CXCL2/MPO/SIPA1L2/NFKBIA/PLAUR/CYP1B1/LMNA/REG3G/PLK2/AREG/GHRL/BASP1/EZR/SLC7A5/ELL2/RGCC/SOCS3/ANXA2/PIM2/NR4A1/NEUROD4/MIDN/TIE1/HMGCS2/NFKB1/LIFR/CDT1/MYCL/ADAMDEC1/MT1E/BCL2L11/CSF3/MAPK6/SH2D1B/ORM1/CMTM6/NOCT/GPX3/MAPRE1/CD93/STK24/ODC1/PTPRE/CYTIP/EMP1/TAL2/MCM4/TNIP1/CD80/RAP2B/EHD1
GSE21546_WT_VS_ELK1_KO_DP_THYMOCYTES_UP	C7_immunologic	195	-0.431362	-1.92286	1.27601e-06	5.16752e-05	4244	tags=34%, list=20%, signal=28%	IKZF2/SMO/XRCC2/MANBA/SLC39A11/VWA3A/RSAD1/NOTCH2/FOS/NRXN1/ZNF839/CRYZ/SYNJ1/ANGPT1/LDHC/IMMP2L/TMBIM1/ABCC4/DRD4/CDK10/INTS9/PTER/MPP7/STK32B/NTPCR/MMP17/TBC1D24/SUOX/OMA1/TPRA1/SETD4/MCEE/FAM120C/CHEK2/MYOZ3/GCNT1/SERPINE2/NFE2/ZNF623/NINL/HSPBAP1/SYCE2/ATG9B/EEF1AKMT1/TMEM204/PCNX2/SIX5/CTSF/ANKH/ARHGAP6/TNS1/HSD3B7/MID1/PEX11A/MESP1/NME8/PLEKHA6/RAB38/HNMT/RGS18/CLEC3B/TUSC1/FRMD4A/GDPD3/WAS…
RASHI_RESPONSE_TO_IONIZING_RADIATION_2	C2_curated	121	0.47325	2.02128	1.28366e-06	5.1901e-05	2697	tags=32%, list=12%, signal=28%	CXCL3/THBS1/CSF1/ICAM1/TUBB2A/RELB/CEBPD/CXCL2/ATF3/PKP3/NFKBIA/MAP3K8/ERBB3/TNFAIP3/ANXA1/JUNB/CDKN1A/PLK2/KLF6/NGF/NFKB2/BIRC3/IRF1/EDN1/SOX4/NFKBIB/RELL1/RNF19B/HP/HIVEP1/BTG2/TIMP3/TAGLN2/LGALS3/PDE4B/MAPKAPK2/CSRP2/CFTR/LCN2
HESS_TARGETS_OF_HOXA9_AND_MEIS1_DN	C2_curated	83	0.526812	2.09162	1.28562e-06	5.1901e-05	2810	tags=41%, list=13%, signal=36%	CXCL3/PHLDA1/MMP9/AQP9/SLFN12L/EGR2/HCK/CLEC7A/ANXA1/UPP1/FGR/CYBB/FPR1/FPR2/C3AR1/MSR1/CSF1R/LSP1/ZFP36/MYADM/CTSV/MPEG1/ID2/FCGR1A/FFAR2/LILRB4/BTG2/P2RY14/ZFP36L1/SAMHD1/OPRPN/TLR2/LCN2/RNASE2
GSE11057_NAIVE_VS_MEMORY_CD4_TCELL_DN	C7_immunologic	193	0.410648	1.87195	1.28664e-06	5.1901e-05	2209	tags=24%, list=10%, signal=22%	TNFRSF4/LGALS1/DUSP5/SH2D1A/IL10RA/CXCR3/PMAIP1/GPR183/IL2RB/PYHIN1/PLP2/SLC2A3/TIMP1/EPHA4/DUSP10/ANXA1/GATA3/CHST7/RAB11FIP1/CD99/KLF6/EZR/CDC42EP3/TIGIT/IQGAP1/EEPD1/COTL1/ANXA2/TNFRSF1B/AHNAK/PTTG1/AHR/RNF19B/SH3BGRL3/CLIC1/CDCA7/TP53INP1/S100A11/HERPUD1/TAGLN2/TPM4/LGALS3/ATP2B1/AKIRIN2/ACTB/PRKCD
GSE14415_ACT_TCONV_VS_ACT_NATURAL_TREG_DN	C7_immunologic	175	0.425886	1.91933	1.31879e-06	5.30681e-05	3648	tags=31%, list=17%, signal=26%	PRF1/CXCL10/PHLDA1/MARCKS/MPO/DUSP4/PLP2/GADD45B/FAM107B/MYL4/ANXA1/LY86/CDKN1A/GBP5/ITGAX/FCER1G/CYBB/CCR1/CHIT1/PRDM1/MTFR2/ELL2/MYADM/ACOT7/MPEG1/ICOS/PTGER4/HOMER1/PGLYRP1/CLIC1/PLK4/SDF2L1/L1CAM/NEK2/STAP1/DTL/PLA2G7/S100A11/ORC6/ITGAM/FOSL2/HIF1A/ODC1/CCDC124/MX1/MYO1F/MXD1/SAMSN1/CYSLTR2/DDX28/MCM4/AIF1/CALM1/CD80/TUBB4B
GSE25088_IL4_VS_IL4_AND_ROSIGLITAZONE_STIM_STAT6_KO_MACROPHAGE_DAY10_DN	C7_immunologic	192	0.416628	1.8967	1.31901e-06	5.30681e-05	3082	tags=24%, list=14%, signal=21%	PRF1/LGALS1/INHBA/NRIP3/DUSP5/IL10RA/IL4I1/RETN/F3/IER3/SH3BP5/BCL2A1/SOCS1/NR4A3/IER5/FGR/BHLHE40/CHST7/GHRL/CHI3L2/TNFAIP2/NFKB2/EBI3/ETS2/CEMIP/IFIT3/PIM2/MT1G/MB21D2/ARL5B/IL15RA/ADNP2/NFKB1/DDIT3/P2RY14/MT1E/C16orf87/CD63/EIF1B/HSPA5/LCN2/HSP90AA1/PSMA1/EAF1/HLA-DOB/CPEB4/SLC7A7
GSE23321_CD8_STEM_CELL_MEMORY_VS_NAIVE_CD8_TCELL_DN	C7_immunologic	189	-0.433251	-1.92807	1.32524e-06	5.32495e-05	5953	tags=48%, list=27%, signal=35%	AP1G2/TMEM134/TACC3/SSH2/VPS52/TRIM38/SP4/DYNC1LI2/PASK/ABR/TMEM218/MON1B/NCKAP1L/IFT74/RBL1/PPOX/NF1/RPRD1A/CEP192/OAS1/UVSSA/BCAS3/SNRPN/ZZEF1/KRBOX4/PCNT/PINK1/IRF3/ABHD14A/TNKS/CHST12/DECR1/RNF214/PAN3/CD99L2/HEATR5B/SLC25A25-AS1/JADE2/RCOR3/TRAPPC12/ERMP1/B3GALT4/ATG2A/CCDC77/TAOK1/CCSER2/LYPLAL1/FAM102A/MDM1/ANGEL2/MFSD1/TNRC6B/SLC38A6/IDNK/IRAK4/GTF2A1/RGS14/TMEM154/ZNF33A/ABTB1/FANCM/PPP1…
GSE40666_STAT1_KO_VS_STAT4_KO_CD8_TCELL_UP	C7_immunologic	195	-0.430967	-1.9211	1.34021e-06	5.37811e-05	6057	tags=47%, list=28%, signal=34%	KANSL1/ARHGEF18/PRPSAP1/NVL/ACY1/TMEM161B-AS1/HIBADH/COQ8A/NAP1L4/AGO4/TFDP2/FIGNL1/GSTCD/ZYG11B/WSB1/ACSS2/DAGLB/CARD6/MIGA1/CEP152/KCTD3/CTBP2/DCAF10/GAB3/PFKFB4/CCDC92/CIAO1/TRAPPC5/SPDL1/MARK3/CUL4B/SETDB1/BBS1/EXOC1/ANKIB1/TIGD2/TTLL5/HMGN5/KNTC1/PLCL2/MAPK14/METTL8/TRAPPC12/IMPA2/VPS72/PSD3/GIGYF2/CDADC1/DEF8/HDHD2/ZNF283/VIPAS39/ZSCAN26/DDI2/LMLN/RFX7/POC5/INPP4A/MBLAC2/NR2C2/SEC22A/PCSK5/…
WP_VITAMIN_D_RECEPTOR_PATHWAY	C2_curated	182	0.424388	1.92342	1.34618e-06	5.39502e-05	3655	tags=34%, list=17%, signal=28%	IRF8/G0S2/IL1RL1/TREM1/SPP1/CYP1A1/IRF4/S100A9/NINJ1/S100A8/PTHLH/TNFSF11/CYP24A1/BCL6/CCND1/DUSP10/TNFAIP3/EFNA5/JUNB/CDKN1A/CDKN2D/MEG8/ADGRE5/PRDM1/CDKN2B/CASP5/CYP2S1/THBD/GADD45A/COL13A1/CCNE1/IL25/PTGER4/LCE1F/HSD17B2/CASP14/TGFB1/DACT2/TIMP3/IGFBP5/ITGAM/ATP2B1/TRPV6/ORM2/SULT1C2/CDKN2A/KRT34/HIF1A/ORM1/ATP2C2/KRT16/SOSTDC1/LGALS9/MXD1/S100G/PNOC/CEBPA/DEFB132/PTH/CST6/CYP3A4
SRSF9_TARGET_GENES	C3_motif	684	-0.314976	-1.59039	1.36868e-06	5.47808e-05	4479	tags=28%, list=21%, signal=23%	USP37/GLG1/SLC35F5/LINC01088/UGGT2/WDR54/SPAG16/TC2N/WRN/TSGA10/SLC27A1/WDR59/TTC21B/PRKD3/ERCC6L2/PAXBP1/GOLGA4/SUMO4/NEAT1/CHODL/TIA1/KIAA0319L/BAZ2B/DTNBP1/GNPAT/MSH2/DUSP22/DOCK7/BPTF/MBD5/UBE3C/CYP27A1/ROBO3/VPS13C/RFX3/ATR/FBXO4/N4BP2L2/DCAF17/ARHGAP5/LINC00211/METTL8/TRAPPC12/ASPH/POP5/HEATR6/EFHC1/CNTLN/ZNF680/LRMP/PREB/RALGAPA1/TK2/RAPGEF2/PRKCH/CIDEB/CLOCK/CLASP2/VPS13D/NIF3L1/MALAT1/PI…
MIR4668_5P	C3_motif	459	-0.339844	-1.65447	1.37688e-06	5.50376e-05	3878	tags=29%, list=18%, signal=25%	SPICE1/CTPS2/TBL1XR1/NR1H3/ANKRD50/ANXA2R/LCORL/ZFP28/GAB1/UBE3C/IL18BP/PDE1C/FBXO4/CDH3/VAPB/TMEM65/ARHGAP5/EYA3/CADM1/RALGAPA1/KIAA0040/LRP6/POU2F1/CLASP2/ATP2B4/GIGYF2/SPOCK3/SAMD4A/ZFP69/KLHL31/BEST3/MEF2C/IQCK/MSI2/TIAM1/NEK9/TMEM67/REP15/DTNA/STAM2/DLG3/GK5/RABGEF1/SNX27/AGO3/COLGALT2/CNNM3/TMEM25/SNAPC1/MAST4/ZMYM6/ZFHX3/ZSWIM6/PPP1R12B/ZNF544/CD164/ZNF518A/ZMYM4/GDNF/LCMT2/MYO5A/PIGN/ETNK…
GCM_MAP4K4	C4_computational	170	-0.445719	-1.96195	1.38907e-06	5.54472e-05	5834	tags=42%, list=27%, signal=31%	KDM3B/GPR107/VPS52/IL6ST/DNAJB14/PACS2/DYNC1LI2/TJAP1/ANKRD17/WSB1/CLEC16A/POGZ/RNF13/PDE4DIP/CCDC92/PSAT1/PHLPP2/HMBOX1/KIDINS220/GPRC5B/TANC2/DLG1/TNKS/SAP30L/SIK3/ZNF84/HERC2/AGPAT4/C2CD3/KIAA1109/USP46/RALGAPA1/PLEKHB1/CLASP2/MYO9A/ULK2/SLAIN1/DTNA/MACF1/KIF1B/ZNF565/SLC18B1/SNX27/DZIP3/ANKFY1/ATRN/SESN3/DDX17/TBCK/DCUN1D4/FAM219A/TTYH2/APPBP2/FRYL/FAN1/BTRC/ABHD6/BBS2/FMNL2/CLIP3/TNS2/MYO10/…
MIKKELSEN_ES_ICP_WITH_H3K4ME3	C2_curated	709	-0.305318	-1.54232	1.39072e-06	5.54472e-05	2650	tags=19%, list=12%, signal=18%	P2RX7/ADPRHL1/ALPK3/DDX60/TMEM154/PLEKHG1/ZNF778/TSNAXIP1/LIMA1/ZFP82/FBXO16/NOL8/POU5F1/PLAT/ARHGEF15/DRC3/FAM13A/CROCC/FAM111A/PM20D1/SRRM3/TIMM21/TMEM14A/FASTKD1/ETFBKMT/CCDC68/RBM41/INPP5J/IL15/CPT1B/TRIM16/C11orf65/SCARF1/FBXO15/PGAM2/SCML4/DPPA2/UPK3B/VPS50/ZNF879/NFE2/CALD1/CTNS/A2M/PCYT1B/BST1/PYROXD2/RNF208/WBP1L/SH3BGR/PATL2/TRIM46/ZNF585A/CHM/CEACAM4/ZMYND8/EID3/LRRC2/ANK3/VWA5A/TRMT10…
MIKKELSEN_NPC_ICP_WITH_H3K4ME3	C2_curated	434	-0.343584	-1.66775	1.41019e-06	5.61511e-05	4659	tags=34%, list=21%, signal=27%	FRRS1/MRPL35/FKBP14/BBS1/ZNF182/PCDHB13/RTTN/PPP2R5C/TXLNB/CDKN2C/SLITRK6/POLD4/DDR2/LIN52/ZNF260/SERPINI1/FKBP7/BIVM/TGFB3/IKZF2/HDAC9/FASTKD2/MPV17/SYT1/WDR12/RAD54L/SAT2/CTSO/NRXN1/CWF19L2/AGPAT4/DYNC2LI1/GSTM2/CD99L2/ALKBH8/PDE1C/VPS41/TPCN2/FAM214A/KIF14/ZC4H2/ANGPT1/TJP3/GMPPA/SLC12A6/SMARCAL1/NIF3L1/CTU1/CCDC77/DYNLRB2/MTERF2/RIN2/MCTS1/C8orf48/TMEM67/DTNA/INTS9/PTER/RAI14/TUT1/IDNK/ABCD2/…
SHEN_SMARCA2_TARGETS_DN	C2_curated	298	0.359693	1.72588	1.41422e-06	5.62391e-05	5161	tags=34%, list=24%, signal=26%	TNF/CAMKV/EGR4/GPR3/IL11/IL1RN/DPF1/SNAI1/TREM1/CLCF1/CPNE7/IRF4/LTA/WNT10B/EPX/ADRA2B/LINC01136/GHRHR/CHRNA3/MMP19/SLC28A1/GPR31/SLC7A10/ALAS2/KIR3DL2/CYP11B2/CAMK2A/GABRD/TNFAIP2/MYBL2/ICOSLG/GABRA1/LILRB3/CYTH4/PDE6G/NLRP3/LILRA1/FOXA2/E2F1/PDGFB/KIR3DL3/ADGRE3/TCP10/DSCAM/FUT3/HTR6/TNFSF8/RGR/OPRM1/LIPC/SLC24A2/RSPH6A/FGF1/LILRA4/PAX4/SMAD5-AS1/SLC1A2/CD82/CEACAM3/NOCT/C15orf39/DAO/CACNG3/IGH…
HALLMARK_EPITHELIAL_MESENCHYMAL_TRANSITION	Hallmark	197	0.412511	1.8923	1.43856e-06	5.71333e-05	2127	tags=29%, list=10%, signal=27%	PTX3/CXCL8/CXCL1/LGALS1/INHBA/THBS1/TNFRSF12A/TFPI2/SPP1/FBN2/COL6A2/COL1A2/IL6/FBLN2/FZD8/SDC4/SERPINE1/SFRP4/PTHLH/GADD45B/TIMP1/PLAUR/SLC6A8/TNFAIP3/DPYSL3/EDIL3/SAT1/VEGFA/RHOB/AREG/EMP3/PDLIM4/COL7A1/BASP1/MXRA5/LAMA2/ITGB5/FBLN5/BDNF/NT5E/GADD45A/FERMT2/ID2/CDH11/DCN/LAMA1/GEM/COL6A3/VIM/COMP/CAP2/MSX1/CTHRC1/TGFB1/LRRC15/SLIT2/TIMP3/TPM4
KRIGE_AMINO_ACID_DEPRIVATION	C2_curated	25	0.739314	2.31217	1.45992e-06	5.78504e-05	1978	tags=48%, list=9%, signal=44%	CXCL8/RETN/ATF3/CLEC7A/CHAC1/CDKN1A/SESN2/VEGFA/GADD45A/CEBPB/DDIT4/DDIT3
GSE30971_WBP7_HET_VS_KO_MACROPHAGE_4H_LPS_STIM_DN	C7_immunologic	187	-0.427555	-1.90008	1.46037e-06	5.78504e-05	4634	tags=36%, list=21%, signal=29%	DUSP3/MAML3/ATP6V0A1/APBB1IP/CD46/EXOC1/ACRBP/ABHD14A/VPS8/RAB42/DEPTOR/ITFG2/BAZ2B/CA11/FGD2/KL/HPS3/ANGPT1/SORBS3/SPATA7/CLEC10A/MEF2C/RAP1GAP2/SULT1A1/ANG/SIGLEC15/ZFHX3/CIITA/DDX17/NHLRC3/PPP1R21/CCDC14/C5/FAM13A/GDPD1/LINC00865/SLC2A9/STK38/PMFBP1/NMNAT3/M1AP/ABCC5/RASA1/HSPBAP1/METTL7A/LINC02035/KCNMB4/SDS/CPVL/FZD2/CHN2/FABP4/FMO4/SLC7A8/UNC5CL/SLC35A1/CYBRD1/ADHFE1/GAS2L3/FMO5/HGF/PAQR8/F…
KEGG_CHEMOKINE_SIGNALING_PATHWAY	C2_curated	188	0.413242	1.8838	1.466e-06	5.79989e-05	4309	tags=31%, list=20%, signal=25%	CCL3/CXCL8/CXCL1/CXCL3/GNG4/CCL5/CXCL10/CCL4/CXCR3/CXCL2/CCL2/CCR7/XCL1/HCK/NFKBIA/CCR4/CXCL11/STAT1/FGR/CCR1/CXCL9/CCL3L3/PIK3R2/CCL3L1/CCR9/NFKBIB/CCL4L2/SHC2/NFKB1/CCL22/CCL19/SHC3/NRAS/PRKCD/GNG5/PIK3R1/CCR8/CCL25/GNAI1/CCL18/ITK/NCF1/RHOA/GNG11/CCL15/CXCL13/XCR1/GRK1/GNAI2/CXCL16/CCL1/XCL2/GRK7/CDC42/GNB1/GNG8/GNG3/CCL17
GSE9006_HEALTHY_VS_TYPE_2_DIABETES_PBMC_AT_DX_UP	C7_immunologic	189	0.418747	1.90291	1.47545e-06	5.82984e-05	9704	tags=68%, list=45%, signal=38%	CD3E/DOK2/SERPINF1/CBX4/HMOX1/MARCKSL1/COTL1/ID2/RNF19B/COX5A/ADNP2/TGFB1/UBE2S/CFL1/ELF4/PPP1R14B/PFN1/AURKAIP1/YBX1/CDCA4/TKT/DBI/GATAD2A/NUTF2/MRPS15/NSMF/GZMM/AHCY/UCP2/PDIA3/RBM3/LIMD2/SF3B4/MFSD10/SRP14/MDH2/ADRM1/RPLP2/RPN1/SSRP1/PFDN2/MYH9/MSN/RNF126/SNF8/EIF4H/CHCHD3/RAB5C/ELOC/MAP2K2/PCBP1/SEC61G/GLUD1/WDR18/DRAP1/C9orf16/R3HCC1/NAA60/PRPF31/CDC37/DDX49/RALY/PSMB10/C12orf10/SUMO3/SNRPF/…
GO_REGULATION_OF_PEPTIDYL_TYROSINE_PHOSPHORYLATION	C5_GO	252	0.378712	1.78703	1.48654e-06	5.85862e-05	2627	tags=24%, list=12%, signal=21%	TNF/TNFRSF18/LIF/CCL5/HBEGF/PDGFA/IL11/ICAM1/CLCF1/IL23A/IL6/SH3BP5/LILRA5/CD3E/SOCS1/NEDD9/EPHA4/ERBB3/EFNA5/IL34/CSF2/CNTF/RIPK2/STAP2/VEGFA/AREG/GPRC5A/RELN/GHRL/NOX4/CSF1R/BDNF/PDGFB/SH2B3/IQGAP1/CADM4/SOCS3/NTRK2/HES1/IL3/IGF1/FCGR1A/RAP2C/ITGB2/EGFR/DOK7/CBLC/STAP1/TGFB1/CCK/ERBB4/PRKCD/OSM/MIF/NTF3/KITLG/ALKAL1/CSF3/IL4/NCF1
GSE46606_UNSTIM_VS_CD40L_IL2_IL5_3DAY_STIMULATED_IRF4MID_SORTED_BCELL_DN	C7_immunologic	198	0.408297	1.87235	1.48654e-06	5.85862e-05	4058	tags=30%, list=19%, signal=24%	ADM/TNFSF9/CCL5/IL2RA/CD70/HCAR2/PBX4/ZC3H12A/TNNI1/NR4A3/ISG15/NFKBIA/CDKN1A/PTGS2/RIPK2/BHLHE40/GBP2/STRIP2/RHOB/BASP1/NEU1/NFKB2/AXL/EBI3/SLC2A6/NFKBIB/SOCS3/TLCD1/PTTG1/PLK3/SLC3A2/REL/UBALD2/GEM/SNX11/IL15RA/B3GNT2/SIPA1L1/MYO1G/STAP1/TIPARP/GZMB/ZBP1/RASGEF1B/ING1/EEF1E1/PLA1A/RHOH/GPR18/C3orf38/MXD1/ARID5A/TNIP1/EHD1/CCL1/DYRK2/CMYA5/ATP10A/SYNPO2L
KRAS.LUNG.BREAST_UP.V1_UP	C6_oncogenic	137	0.450738	1.94354	1.50665e-06	5.9303e-05	2462	tags=28%, list=11%, signal=25%	RPS4Y1/CXCL8/CXCL1/CXCL3/INHBA/LIF/HBEGF/HAS2/G0S2/IL1RL1/RETN/MMP9/IL23A/CXCL2/TNFAIP3/SH2D2A/PTGS2/DNAH9/CSF2/SPRY2/RELN/PRDM1/LDB3/BIRC3/LILRA6/ID2/TRAF1/KCNK15/CD1A/TAGLN3/HSD17B2/GYPC/CTNNA2/ADAM8/TFDP3/GULP1/ISG20/CSF3
GCM_MLL	C4_computational	166	-0.442478	-1.93331	1.51392e-06	5.95133e-05	7416	tags=62%, list=34%, signal=41%	TAF9B/ZNF529/RBM25/WDR70/PTCD3/USP9X/BAHD1/DYNC1I2/RABL2B/MORF4L1/PHF2/SH2B1/ZBTB22/THUMPD1/TNPO1/CASP2/DFFA/METTL17/ANKRD12/PGRMC2/MTMR4/NUP133/CHAMP1/ANKRA2/ANKRD10/BOD1L1/EPM2AIP1/USP19/MTMR3/RBM4B/INTS5/TRAPPC6B/FOXO3/ZNF292/MTMR7/JKAMP/TNPO2/GFM2/KDM3B/PRRC2B/MAEA/PACS2/SPECC1L/FBXL20/NAA25/PRDM4/APBB3/C5orf51/NCOA5/CLEC16A/TARDBP/TTC14/POGZ/MED17/FNTB/ZNF212/VPS53/ZNF274/RPL7L1/EXOC5/SLC25A…
GO_RESPONSE_TO_CORTICOSTEROID	C5_GO	162	0.434544	1.93137	1.54059e-06	6.04848e-05	2425	tags=25%, list=11%, signal=22%	TNF/ADM/IL1RN/STAR/ICAM1/IL6/SSTR2/GHRHR/GPER1/CCND1/ANXA1/CDKN1A/PTGS2/CYBB/SERPINF1/FOSL1/AREG/TPH2/ZFP36/CTSV/EDN1/TRIM63/TAT/ADCYAP1/CLDN1/EGFR/IL22/DDIT4/AGXT/S100B/SLIT2/HSD3B2/ZFP36L1/ATP2B1/TYMS/BCL2L11/CYBA/CALCR/CSN1S1/IL10
GO_REGULATION_OF_ALPHA_BETA_T_CELL_DIFFERENTIATION	C5_GO	63	0.574626	2.18233	1.54263e-06	6.04878e-05	1186	tags=32%, list=5%, signal=30%	CD83/IL23A/IRF4/IL12RB1/ZC3H12A/SOCS1/ZAP70/BCL6/HLX/ANXA1/TBX21/SHH/RIPK2/GATA3/PRDM1/ZNF683/RARA/NFKBID/NLRP3/RUNX3
GSE29618_BCELL_VS_PDC_UP	C7_immunologic	186	0.414633	1.88801	1.56523e-06	6.12442e-05	4626	tags=36%, list=21%, signal=29%	MARCKS/PMAIP1/CD83/ECE1/SH3BP5/IGKC/P2RX5/BCL2A1/PDLIM1/CD69/SLC2A3/IER5/RRAS2/NFKBIA/CD48/LY86/JUNB/KLF2/TRIB2/CD79A/PELI1/RHOB/IER2/BASP1/EZR/BIRC3/CDC42EP3/NT5E/PTP4A1/HES1/FCER2/CHST2/STAP1/DDIT3/MTSS1/CLIC4/ADAM8/TUBA4A/ZFP36L1/ATP2B1/TNFRSF13B/ISG20/EIF1B/HIF1A/PDK1/SHMT2/MKNK2/TSC22D3/HLA-DOB/IGLJ3/HMGB2/TTC9/RHOH/IGHM/LINC00623/P2RY10/EGR1/LIMD2/LAT2/BTG1/PLEKHF2/CDKN1B/RAB8B/IGHG1/BACH1/…
RASHI_NFKB1_TARGETS	C2_curated	19	0.788659	2.27321	1.56589e-06	6.12442e-05	2697	tags=68%, list=12%, signal=60%	CXCL3/CSF1/RELB/CXCL2/NFKBIA/MAP3K8/TNFAIP3/NFKB2/BIRC3/IRF1/NFKBIB/BTG2/LCN2
GSE2706_UNSTIM_VS_2H_LPS_DC_UP	C7_immunologic	177	-0.440369	-1.93753	1.57084e-06	6.136e-05	4706	tags=40%, list=22%, signal=31%	CRAMP1/SETDB1/ZBTB41/HCFC2/NRDE2/ZNF260/YEATS2/RIOX2/ZNF23/CACNA2D4/SCYL3/ASTE1/CEP295/POLK/AGAP4/ANKRD13D/NHLRC2/ZFP69/C12orf65/LYRM7/HINFP/ELOA-AS1/GIMAP8/PLD6/ZNF354A/DZIP3/NEURL4/PAPOLG/ZSCAN26/ZNF473/ZFP82/TSPAN12/C17orf80/CBFA2T2/RTN4RL1/ZNF813/ZNF302/ZNF184/ZNF564/ZFP62/GPR155/ZNF224/ZNF606/ZNF322/ZKSCAN1/ENO2/SMIM17/ZNF879/NFE2/ZNF493/ZNF692/WDCP/ZNF449/ZKSCAN4/NAPEPLD/ZNF397/ZNF439/NBPF1…
MIR582_5P	C3_motif	355	-0.364814	-1.7472	1.5861e-06	6.18781e-05	4517	tags=32%, list=21%, signal=26%	MEIOC/ERLIN1/ELAVL3/NDUFAF4/PDE7A/TCF12/TSHZ3/FAM81A/ZNF624/PAXBP1/IKZF2/GIMAP2/PLA2G12A/PPARGC1B/TBL1XR1/TRIM22/TAF4/ZNF532/CREBZF/SORT1/CYFIP1/PPP4R3B/ALG9/ABHD10/MAPK14/KALRN/PPFIA1/CPEB1/POU2F1/INPP5B/NIF3L1/TFAP4/NHLRC2/ANKRD44/SMC4/RIN2/SCAI/SH2D3C/PURA/TAOK1/NEK9/COL5A1/ALG13/ESR2/SIMC1/SERINC3/COLGALT2/ZNF354A/FBN1/ZFHX3/TMEM19/CPNE8/MINDY2/KHDRBS2/OVGP1/NIPAL2/ETNK1/RTN4RL1/KIF13A/INSIG2…
GO_TERTIARY_GRANULE_MEMBRANE	C5_GO	72	0.546034	2.11057	1.59128e-06	6.19886e-05	3595	tags=36%, list=17%, signal=30%	GPR84/PLAU/CD177/SLC2A3/MCEMP1/ITGAX/FCER1G/CYBB/FCAR/SIGLEC14/FPR2/CD33/CLEC4D/TRPM2/SIGLEC5/RAP2C/ITGB2/LAMTOR2/ITGAM/ADAM8/NRAS/CYBA/CD93/VAMP1/CYSTM1/RAP2B
GO_REGULATION_OF_ION_TRANSPORT	C5_GO	675	0.301332	1.55412	1.59295e-06	6.19886e-05	3598	tags=26%, list=17%, signal=22%	CCL3/RRAD/CCL5/CXCL10/ARC/THBS1/CCL4/JPH1/ICAM1/KCNH4/TESC/MMP9/LILRA5/TRH/P2RX5/HSPA2/CCL2/PTPN3/TCAF2/SFRP4/JPH4/XCL1/KCNQ2/CHRNA3/KCNH2/TWIST1/GPER1/RGS2/KCNJ16/KCNF1/TNFSF11/HAP1/RNF207/WNK4/APOE/PTGS2/CXCL11/RCVRN/KCNH7/PPIF/GALR2/GAL/FXYD2/KCNK5/SNTA1/KCNJ2/EDN3/KCNN2/CYBB/SCN4B/F2RL3/CCR1/CACNA1A/GRIA1/CAMK2A/ASIC2/FXYD6/RELN/DYSF/SYT12/CXCL9/SCN1A/SLC43A2/CORO1A/ANK2/SCN3B/KCND2/CD33/CACN…
KAN_RESPONSE_TO_ARSENIC_TRIOXIDE	C2_curated	121	0.470864	2.01109	1.66788e-06	6.48226e-05	2146	tags=30%, list=10%, signal=27%	ADM/CXCL8/THBS1/IL11/GFPT2/IGF2BP3/ATF3/SERPINE1/LDLR/ARL4C/MT2A/PTHLH/SLC2A3/TMEM158/CLEC2B/CRYAB/DPYSL3/GPR65/SCD/PLK2/HMOX1/HSPA6/MT1H/SOX2/ID2/MT1G/MAP1LC3B/AKR1B10/DDIT4/BOP1/DDIT3/PTPRZ1/IGFBP5/SLC30A1/MT1E/ANKRD1
MODULE_433	C4_computational	60	0.578269	2.16553	1.67924e-06	6.51821e-05	3556	tags=45%, list=16%, signal=38%	CXCL8/TNFSF9/CXCL1/INHBA/LIF/HBEGF/CSF1/PDGFA/IL11/IL6/LTB/AREG/FGF6/PDGFB/IGF1/PGLYRP1/OSM/FGF1/NTF3/IFNA5/CSF3/IL17A/FGF2/FGF12/NAMPT/BMP7/IGF2
DASU_IL6_SIGNALING_UP	C2_curated	58	0.575426	2.13754	1.68257e-06	6.52293e-05	2166	tags=34%, list=10%, signal=31%	CXCL8/CXCL3/IER3/IL6/CCL2/COL6A1/SERPINB2/TMEM158/RGL1/NMB/IFI30/LY6E/ZFP36/SOX4/CEBPB/TNFAIP6/GEM/TGFB1/MAFF/ATP2B1
WP_APOPTOSISRELATED_NETWORK_DUE_TO_ALTERED_NOTCH3_IN_OVARIAN_CANCER	C2_curated	53	0.589175	2.16475	1.69288e-06	6.55466e-05	4657	tags=47%, list=21%, signal=37%	TNF/THBS1/IER3/BCL3/ERBB3/APOE/CDKN1A/RIPK2/NQO1/CARD14/SOCS3/TRAF1/NFKB1/VIM/SMAD7/HSPA5/TNFRSF21/TNFRSF10B/RNF7/CDKN1B/BEX3/ETS1/HDAC1/SQSTM1/JUND
GSE37301_HEMATOPOIETIC_STEM_CELL_VS_RAG2_KO_NK_CELL_DN	C7_immunologic	177	0.428175	1.93433	1.77483e-06	6.86334e-05	3767	tags=34%, list=17%, signal=28%	TPPP/ARC/IL10RA/CXCR3/IL1RL1/GPR183/OLFML3/HSPA2/ATF3/CD28/PLP2/CD69/FAM107B/SLC2A3/RGS2/TNFSF11/ZBTB32/TNFAIP3/JUNB/EIF5A2/TOX2/GATA3/ADGRE5/PLK2/RHOB/KLF6/EBI3/NT5E/GADD45A/UBC/CEBPB/IQGAP1/RGS9/AHNAK/NR4A1/ARL4D/PLK3/IL18RAP/HEXIM1/RGS1/BTG2/PIM1/ATP2B1/IL10/PGRMC1/ATF4/JMJD6/HSP90AA1/SEPHS2/KCTD10/DNAJB1/NABP1/EMP1/MYO1F/ADORA2A/CRIP1/GGH/RAB5A/TAGAP/PSENEN
REACTOME_RESPONSE_OF_EIF2AK4_GCN2_TO_AMINO_ACID_DEFICIENCY	C2_curated	102	0.483418	1.99799	1.77996e-06	6.87458e-05	8916	tags=71%, list=41%, signal=42%	RPS4Y1/ATF3/RPS4Y2/CEBPB/DDIT3/ATF4/RPL3L/RPS16/RPS2/RPS17/FAU/RPLP2/RPL28/TRIB3/RPL37A/RPS27A/RPS26/RPL23A/RPL29/RPLP1/RPL6/RPS15/RPL26/RPL19/UBA52/RPL14/RPS5/RPL36AL/RPL4/RPL27/RPS8/RPS27L/RPS7/CEBPG/RPL8/RPS19/RPL13A/RPS12/RPS11/RPL24/RPS9/RPL37/RPL18/RPL7A/RPL10A/RPL23/RPL7/RPL27A/RPS10/RPS14/RPS13/RPS29/RPL22L1/RPL17/RPL35/RPL38/RPL32/RPS15A/RPS20/RPL10/RPS25/RPL39L/RPL36/RPL34/RPL39/RPLP0/R…
DAZARD_UV_RESPONSE_CLUSTER_G2	C2_curated	26	0.717318	2.24677	1.78505e-06	6.8856e-05	1202	tags=42%, list=6%, signal=40%	CXCL8/CXCL3/PHLDA2/PMAIP1/IER3/SGK1/CXCL2/ATF3/JUNB/LY6E/GADD45A
GSE37301_HEMATOPOIETIC_STEM_CELL_VS_CD4_TCELL_UP	C7_immunologic	169	0.413875	1.84967	1.78997e-06	6.89595e-05	4928	tags=34%, list=23%, signal=27%	IRF8/HDC/CCL5/CXCL10/SLC15A3/MMP9/CD83/S100A9/BHLHE41/RAB31/ADAP1/TBX21/STAT1/SEMA7A/FGR/FCER1G/CD68/FPR1/CCDC50/CXCL9/SLC16A6/CSF1R/KLRG1/ELL2/E2F1/FCGR3A/ANXA2/TLR9/PFKFB3/GEM/IL18RAP/LILRB4/DTL/GZMB/PLK1/SAMHD1/ZBP1/C3/LCN2/NEB/CDC25C/MXD1/KIF11/CD80/UBE2J1/ANKRD55/SNX9/CCNA2/RASSF4/NLRC5/KLRC3/CFP/TIFA/XDH/GDA/ANLN/CAMP/RAPGEF5
GO_CILIUM_ORGANIZATION	C5_GO	381	-0.352632	-1.6978	1.7991e-06	6.91911e-05	5246	tags=40%, list=24%, signal=31%	SFI1/TEKT1/TTC25/CDK1/ALMS1/CEP152/CENPJ/TSGA10IP/POC1B/CEP120/OFD1/TOGARAM1/ABLIM3/TCTN2/CEP192/BBIP1/EXOC5/CEP131/WDPCP/DZIP1/RPGR/TTBK2/BBS4/AKAP4/EVI5L/ATAT1/STK36/CEP78/PCNT/BBS1/CEP70/RTTN/CCDC13/LCA5L/SPAG16/TTC21B/HYDIN/HAUS3/DNAJB13/B9D2/TTC17/FGFR1OP/KIF17/OCRL/ARMC9/DYNC2LI1/AHI1/C2CD3/RFX3/DNAH1/CEP72/CELSR3/TTC8/TTC30A/PKD2/DISC1/AKAP9/NUDCD3/ARMC2/PIBF1/LAMA5/TTC30B/FAM161B/KIAA0586…
KIM_WT1_TARGETS_8HR_UP	C2_curated	165	0.431732	1.92715	1.80046e-06	6.91911e-05	2759	tags=29%, list=13%, signal=26%	ADM/WT1/ARC/HBEGF/CSF1/PHLDA2/IL11/TRIB1/IL1RAP/SH3BP5/DLX2/GFPT2/SERPINE1/BCL2A1/PTHLH/PLAUR/PCDH7/JUNB/PDE10A/ULBP2/FOSL1/AREG/SFN/MAP2K3/PDLIM4/HSPA6/PLEKHO1/FGFR1/EIF5A/DOK5/HMGA1/GEM/SOX9/PIM1/DNAJB4/DNAJB5/TIMP3/ZYX/MAFF/TUBA4A/ATP2B1/PRKCD/FGF1/RHOF/HSP90AA1/SERTAD2/MKNK2/HSPA1B
MIR4668_3P	C3_motif	299	-0.375351	-1.75972	1.822e-06	6.99316e-05	4378	tags=33%, list=20%, signal=27%	TC2N/FAM81A/ZSCAN2/PHIP/MBTD1/ZZZ3/FBXO3/PAN3/SPIN4/USP13/SCAMP1/NOTCH2/UHRF2/OSBPL6/ATP8A1/ADGRL3/CADM1/RNF180/SLC35A3/EXTL3/PPFIA1/TRERF1/SLC16A7/CLOCK/SPOCK3/KLHL31/PPM1E/GGACT/NR1D2/LYRM7/MSI2/HSF5/AP1AR/MDM1/TVP23C/ELAVL4/VPS36/GOLGA1/FZD7/CNNM3/UBN2/ERCC6/ZFHX3/MINDY2/EDEM3/FAM160A1/NIPSNAP3B/MSANTD2/ZDHHC21/KHDRBS2/ARL13B/UBR2/CDK19/HLTF/S100PBP/TCF4/CHIC1/CPS1/STK38/HLF/SLC9A9/PPFIBP1/C2C…
GSE1460_INTRATHYMIC_T_PROGENITOR_VS_CD4_THYMOCYTE_DN	C7_immunologic	196	0.409593	1.87604	1.84056e-06	7.05563e-05	2275	tags=24%, list=10%, signal=22%	TNF/PDGFA/HLA-G/GPR183/IL2RB/LTB/SGK1/CCR7/DOK2/IFITM1/CD6/NEDD9/KCNH2/NR4A3/TENM1/BAG3/TNFAIP3/CRTAM/STAT1/GPR65/GBP2/GCH1/SLAMF1/S1PR1/RBM38/SPON1/IER2/NCALD/BIRC3/DHRS3/CD27/SH2B3/COTL1/ADGB/TNFRSF1B/ICOS/PIM2/ST3GAL5/TNFRSF25/ITGB2/COL6A3/LPXN/LYPD3/SMAD7/ENC1/ZFP36L1/HLA-B/PDE4B
GO_PROTEIN_TYROSINE_THREONINE_PHOSPHATASE_ACTIVITY	C5_GO	10	0.89892	2.14015	1.86264e-06	7.1314e-05	447	tags=50%, list=2%, signal=49%	DUSP8/DUSP5/DUSP2/DUSP4/DUSP10
GSE32034_LY6C_HIGH_VS_LOW_ROSIGLIZATONE_TREATED_MONOCYTE_DN	C7_immunologic	198	0.406519	1.8642	1.8651e-06	7.13198e-05	2842	tags=25%, list=13%, signal=22%	EIF1AY/TNFSF9/CXCL10/CCL4/CXCR3/BCL3/CEBPD/DLX2/CCL2/GADD45G/SOAT2/TSKU/SOCS1/IL2RG/TIMP1/MAP3K8/JUNB/CDKN2D/PPIF/GCH1/CHI3L1/CCR1/IFI30/HMOX1/CD99/CH25H/RASAL1/ZFP36/ETS2/DPEP1/IRF1/PTGER4/ST3GAL5/MIDN/COL19A1/CFHR1/TBR1/TGFB1/PIM1/TIPARP/IGLL1/GUCA1A/TUBA4A/MAPK6/ACOD1/HIF1A/PIGR/NOCT/ENO1
MAHAJAN_RESPONSE_TO_IL1A_UP	C2_curated	77	0.536726	2.12119	1.87031e-06	7.14305e-05	2357	tags=32%, list=11%, signal=29%	CXCL3/CCL5/THBS1/HBEGF/TFPI2/OASL/IL2RB/IL6/SSTR2/CXCL2/NEDD9/SERPINB2/CSF2/STAT1/CHST7/RHOB/COL7A1/TNFAIP2/EDN1/PIM2/IL15RA/KCNA1/PTPRZ1/PTP4A3/ISG20
HELLER_HDAC_TARGETS_SILENCED_BY_METHYLATION_UP	C2_curated	425	0.329817	1.64307	1.8803e-06	7.17235e-05	3034	tags=26%, list=14%, signal=23%	RRAD/EGR4/PHLDA2/DUSP2/CCNA1/TFPI2/SNAI1/BAIAP3/SPP1/IER3/CYP1A1/TUBB2A/COL6A2/SPAG6/DLX2/HSPA2/SDC4/HOXA1/HPGD/EGR2/PEG10/MT2A/MIR22HG/NEDD9/TENM1/TIMP1/BCL6/HBA2/SLC6A8/CYP1B1/TST/TUBB6/APOE/CDKN1A/CXCL11/CRISPLD2/ULBP2/STAT1/KLF2/MAFB/GAL/GATA3/SAT1/KCNN2/RUNDC3B/SERPINF1/PLK2/RHOB/AREG/MARCKSL1/SLC17A7/HBA1/SMPD3/CACNA1G/NEU1/BIRC3/IZUMO4/CSTA/PGF/RAI2/CTSV/ACOT7/SOX4/PGBD5/SLC12A8/COTL1/MT1H…
MIR302E	C3_motif	470	-0.335683	-1.63916	1.91181e-06	7.28354e-05	3706	tags=26%, list=17%, signal=22%	USP46/FGD5/PKD2/TMEM170B/PLAG1/RFLNA/CPEB1/TRERF1/SLC33A1/TANC1/POU2F1/PSD3/TFAP4/PIKFYVE/ASF1A/NHLRC2/CHURC1/KIF26B/SPOP/TMEM86A/ZNF652/ZMYND11/SLAIN1/ERCC4/CLIP4/TIAM1/MIGA2/TAOK1/REEP3/E2F5/ZFPM1/PDE8A/PBK/EZH1/GK5/GOLGA1/CNOT6/MCC/SKIDA1/SLC16A10/UNKL/RSBN1L/ITGB8/PDIK1L/MAGEH1/ST7L/ADAT2/GPM6A/NHLRC3/SS18L1/CMTR2/NR2C2/TBC1D2/DCUN1D4/ROCK2/PPARA/HABP4/PIGM/CADM2/MFAP3L/ZNRF3/BCL11A/ZKSCAN1/T…
GSE21360_PRIMARY_VS_QUATERNARY_MEMORY_CD8_TCELL_UP	C7_immunologic	171	0.425241	1.89869	1.91781e-06	7.29737e-05	3388	tags=34%, list=16%, signal=29%	CXCL3/GSTM1/CCL5/IL1RN/GAS7/CD83/S100A10/CCL2/ATF3/SERPINE1/HPGD/EGR2/IL2RG/LGALS3BP/CLEC7A/SLC6A8/STAT1/LMNA/CYBB/KIR3DL2/ADGRE5/CACNA1A/PLK2/PDE7B/CCDC50/LY6E/PDLIM4/TNFAIP2/CLEC4D/NQO1/LRP12/PTCHD1/EEPD1/IFIT3/AHNAK/IGF1/IFIT2/MET/RGS1/STAP1/MTHFD2/CLIC4/LGALS3/PRKCD/IRF7/SAMHD1/ALAS1/CMPK2/C3/USP18/ODC1/CYTIP/CPEB4/EMP1/MYO1F/UBE2L6/GABARAPL1/CRIP1
JEON_SMAD6_TARGETS_UP	C2_curated	24	0.738817	2.28124	1.92307e-06	7.30838e-05	470	tags=29%, list=2%, signal=29%	PTX3/CXCL8/THBS1/CSF1/TRIB1/SERPINE1/FILIP1L
FERRARI_RESPONSE_TO_FENRETINIDE_UP	C2_curated	21	0.757835	2.24781	1.92711e-06	7.31473e-05	2062	tags=57%, list=9%, signal=52%	CXCL3/CXCL2/ATF3/PTGS2/BHLHE40/GPRC5A/SLC7A5/DHRS3/IRF1/DDIT4/DDIT3/HERPUD1
GSE38696_LIGHT_ZONE_VS_DARK_ZONE_BCELL_UP	C7_immunologic	174	-0.438802	-1.93177	2.00866e-06	7.6149e-05	5677	tags=52%, list=26%, signal=39%	JKAMP/RNF145/ARHGEF18/MADD/XIAP/CEP95/SPAST/HS1BP3/RAPGEF6/CELF2/RIF1/CEP97/ZCCHC7/FBXL20/HMG20A/ATP9B/STAG1/ST8SIA1/MTIF2/INPP4B/EHMT1/POLL/NFYB/UBR5/UTRN/FMR1/DIDO1/DHX36/LUC7L3/MYCBP2/KLHL7/ZDHHC17/DDX47/GMCL1/AUH/ATP8B4/TMEM18/TIA1/VAV1/THOC2/HERC2/EIF4A2/GNPAT/CTSO/TPCN2/BTAF1/PRKCQ/ACAD10/SLC12A7/HDAC8/TANC1/ANAPC4/VPS13D/PVR/PCMTD2/ALG10B/MON1A/SDCCAG8/NEK9/PPWD1/TRMT11/MACF1/DENND4C/MPP7/…
MIR6809_3P	C3_motif	549	-0.322568	-1.59882	2.03054e-06	7.6884e-05	3502	tags=27%, list=16%, signal=23%	SLC36A4/ALKBH8/MEX3A/ATP8A1/NTN4/KALRN/JADE2/MFSD4B/SLA/TMEM170B/NFATC2/CD84/MICAL3/RPS6KA6/CCSER1/SYNPO2/STUM/NHLRC2/ST6GALNAC5/MBOAT2/TBL1X/ZNF701/SCAI/ZNF761/HIVEP2/C22orf46/MSI2/PURA/NEK9/GAREM1/SLC8A3/DLG3/ZNF189/PTER/ZNF514/SOBP/TNRC6B/SNX27/TREML4/DIP2C/COL11A2/MINDY2/SLC25A17/SOCS7/DOCK10/ZNF90/ZMYM4/SH3PXD2A/NIPSNAP3B/FANCM/CCDC14/HOXB4/MBLAC2/LTN1/ZNF117/GALNT15/ZNF730/ZNF813/ZNF302/LRR…
GSE22886_NAIVE_VS_IGM_MEMORY_BCELL_DN	C7_immunologic	189	0.415132	1.88648	2.08137e-06	7.87122e-05	3724	tags=31%, list=17%, signal=26%	LGALS1/DUSP2/MARCKS/IL10RA/SLC15A3/CD70/ITGB7/GPR183/S100A10/TRAF4/PLP2/BHLHE41/RAB31/ZBTB32/PPIF/CSGALNACT1/BHLHE40/FCGR2A/IFI30/PPP1R16B/HSPA6/CD27/KPNA2/COTL1/SOCS3/ANXA2/TNFRSF1B/IFI6/AHNAK/ST3GAL5/TPI1/VIM/LPXN/RGS10/ITGAM/MNDA/HLA-B/LY96/CD1C/CD82/ITM2C/FABP5/ALDOA/CKAP4/ACTG1/GAPDH/ING1/GNG11/TYMP/SLC7A7/VAMP1/SAMSN1/SEC61B/CRIP1/TLE3/EHD1/TUBB4B/GAMT
GO_REGULATION_OF_CHEMOTAXIS	C5_GO	218	0.394745	1.83769	2.14123e-06	8.08768e-05	3295	tags=30%, list=15%, signal=26%	CCL3/CXCL8/CCL5/CXCL10/THBS1/CSF1/CCL4/ADGRA2/F3/GPR183/IL23A/IL6/CCL2/SERPINE1/CCR7/SEMA6A/XCL1/IL34/CCR4/SEMA7A/EDN3/VEGFA/C5AR1/CCR1/AZU1/S1PR1/DYSF/FPR2/C3AR1/CSF1R/PGF/PDGFB/EDN1/FGFR1/DSCAM/TMSB4X/MET/DDT/PRSS56/TBR1/CCL19/STAP1/CALR/TGFB1/AKIRIN1/PLA2G7/ROBO2/SLIT2/SEMA4G/MIF/FGF1/NTF3/C1QBP/IL4/DAPK2/TUBB2B/ANGPT2/RARRES2/WNT5A/CAMK1D/CXCL17/FGF2/LGALS9/POU4F2/GPR18/CXCL13
MIR93_5P	C3_motif	600	-0.318738	-1.59199	2.14896e-06	8.10693e-05	4217	tags=29%, list=19%, signal=24%	KMT5B/WFS1/ST3GAL1/GNS/ANKRD50/SRGAP1/RASGRF2/EIF4A2/FSD1L/OCRL/MAP7/ANO6/TAOK3/GAB1/UBE3C/REV3L/NTN4/ZNF264/MAP10/NKIRAS1/CC2D1A/PXYLP1/SMOC1/EFCAB14/USP46/FGD5/PKD2/PLAG1/ZFAND4/RAB10/SLC33A1/TANC1/CLOCK/RPS6KA6/PRR14L/USP28/CRYBG3/KIF26B/ZNF652/CENPQ/PRDM6/BEST3/RBL2/CLIP4/BRWD1/TIAM1/TAOK1/NAGK/FAM102A/REEP3/E2F5/ZFPM2/SLC4A8/EZH1/GOLGA1/CNOT6/CREB1/ATL3/SLC46A3/ANKFY1/ATG2B/MEX3D/UNKL/ITGB8/…
BOSCO_ALLERGEN_INDUCED_TH2_ASSOCIATED_MODULE	C2_curated	146	0.440255	1.9254	2.17214e-06	8.18437e-05	3813	tags=32%, list=18%, signal=27%	LIF/DUSP5/CSF1/PLPP1/IL2RA/TNFRSF9/JCHAIN/CD83/IRF4/RASL11A/SYTL3/DUSP4/HPGD/CD69/SOCS1/LRRC32/NR4A3/BCL6/SEMA7A/SGSH/BHLHE40/KRT1/DHRS3/ELL2/FURIN/NDFIP2/ID2/FCER2/CYTOR/FLT3LG/SLC26A11/CCL22/STAP1/MEOX1/DCDC1/ITK/TSC22D3/ENO1/CYTIP/NABP1/CXCL13/RFLNB/CYSLTR2/STK17B/RAP2B/CCL1/CYLD
MIR20B_5P	C3_motif	601	-0.319745	-1.59778	2.17595e-06	8.18874e-05	4217	tags=29%, list=19%, signal=24%	KMT5B/WFS1/ST3GAL1/GNS/ANKRD50/SRGAP1/RASGRF2/EIF4A2/FSD1L/OCRL/MAP7/ANO6/TAOK3/GAB1/UBE3C/REV3L/NTN4/ZNF264/MAP10/NKIRAS1/CC2D1A/PXYLP1/SMOC1/EFCAB14/USP46/FGD5/PKD2/PLAG1/ZFAND4/RAB10/SLC33A1/TANC1/CLOCK/RPS6KA6/PRR14L/USP28/CRYBG3/KIF26B/ZNF652/CENPQ/PRDM6/BEST3/RBL2/CLIP4/BRWD1/TIAM1/TAOK1/NAGK/FAM102A/REEP3/E2F5/ZFPM2/SLC4A8/EZH1/GOLGA1/CNOT6/CREB1/ATL3/RBM12B/SLC46A3/ANKFY1/ATG2B/MEX3D/UNKL…
GO_POSITIVE_REGULATION_OF_INFLAMMATORY_RESPONSE	C5_GO	142	0.443863	1.92902	2.1902e-06	8.23233e-05	3000	tags=30%, list=14%, signal=26%	TNF/CCL3/IL1RL1/IL23A/IL6/LILRA5/LTA/S100A9/SERPINE1/LDLR/CD28/CCR7/S100A12/CD6/S100A8/F12/TNFSF11/CLEC7A/NFKBIA/PTGS2/GBP5/FCER1G/CEBPB/TLR7/PLA2G2A/PTGER4/TLR9/EGFR/FFAR2/DDT/STAP1/PLA2G7/ADAM8/OSM/ZBP1/IL17A/TLR2/C3/NLRP10/TICAM1/WNT5A/PLA2G3
GO_POSITIVE_REGULATION_OF_MACROPHAGE_DIFFERENTIATION	C5_GO	14	0.838872	2.21299	2.2006e-06	8.26134e-05	1981	tags=57%, list=9%, signal=52%	ROR2/LIF/CSF1/TRIB1/IL34/PRKCA/ID2/TGFB1
GSE13484_UNSTIM_VS_3H_YF17D_VACCINE_STIM_PBMC_DN	C7_immunologic	195	0.411554	1.8849	2.2367e-06	8.3765e-05	5468	tags=37%, list=25%, signal=28%	ADM/CXCL8/MSC/THBS1/KCNN1/TNFRSF12A/CXCR3/KYNU/MMP9/BCL3/IRF4/PLAU/ZC3H12A/MT2A/GADD45B/S100A5/NFKBIE/SH2D2A/GALNT14/GPRC5A/IRS1/IRGQ/EBI3/PIM2/PLK3/MT1G/ABTB2/IFITM2/DSCAM/HMGCS2/STAP1/DNAJB4/ADAMDEC1/TPM4/SLC22A4/SPATA6L/HMGCS1/EIF1B/IL12RB2/JMJD6/FAS/CYTIP/UBE2L6/MXD1/NAMPT/PSMA2/HRC/SNRPB/MAGEC1/EHD1/SIM2/CYLD/COQ10B/DKK3/ATP10A/PLEKHO2/NOP10/ESPL1/NXT2/BZW1/SNIP1/LMNB1/LAMB3/FICD/TMED5/MICAL…
GSE36078_WT_VS_IL1R_KO_LUNG_DC_AFTER_AD5_INF_UP	C7_immunologic	195	0.411644	1.88531	2.2367e-06	8.3765e-05	2133	tags=23%, list=10%, signal=21%	LGALS1/CD7/CCL5/DUSP5/IL2RA/GAS7/IER3/ITGB7/IL2RB/NKG7/SGK1/AQP9/RASL11A/PLP2/SLC2A3/RGS2/MYL4/TYROBP/ANXA1/METRNL/CDKN1A/CSF2/ITGAX/CLDND2/BHLHE40/ACTN2/KLRG1/CAMK2N1/CYP2S1/EFHD2/ID2/C15orf48/IFITM2/FLT3LG/CHRNA9/L1CAM/NFIL3/VIM/ERMN/BTG2/ZYX/GZMB/LGALS3/P2RY14
WP_SELECTIVE_EXPRESSION_OF_CHEMOKINE_RECEPTORS_DURING_TCELL_POLARIZATION	C2_curated	29	0.705314	2.24959	2.24517e-06	8.39803e-05	2573	tags=41%, list=12%, signal=37%	CCL3/CCL4/CXCR3/IL12RB1/CD28/CCR7/CCR4/CSF2/CCR1/TGFB1/IL12RB2/IL4
KAECH_NAIVE_VS_DAY15_EFF_CD8_TCELL_DN	C7_immunologic	194	0.40749	1.85948	2.26556e-06	8.46404e-05	3487	tags=27%, list=16%, signal=23%	PRF1/LGALS1/CCL5/CCL4/SH2D1A/IL10RA/CXCR3/S100A10/AQP9/BCL2A1/TENM1/ANXA1/CRTAM/ITGAX/FGR/BHLHE40/PRDM1/EMP3/KLRG1/ELL2/MYADM/NT5E/ACOT7/CD160/EFHD2/ANXA2/AHNAK/ID2/PTTG1/RNF19B/PGLYRP1/VMP1/IL18RAP/S100A11/INSM1/GZMB/LGALS3/ACTB/ALG2/DAPK2/HLA-A/FAM89B/TXN/LYPLA2/HMGB2/EMP1/POLR2L/MYO1F/KCTD9/ADORA2A/PHF13/GGH
AIZARANI_LIVER_C12_NK_NKT_CELLS_4	C8_cellSignature	48	0.610273	2.1869	2.27611e-06	8.49316e-05	3270	tags=44%, list=15%, signal=37%	CD7/CCL5/DUSP2/IL2RB/NKG7/PYHIN1/SYTL3/CD3E/CD69/IFITM1/IL2RG/BAG3/HSPA6/RUNX3/CST7/ALOX5AP/BTG2/HSP90AA1/HSPA1B/DNAJB1/LCP1
GO_ASTROCYTE_DIFFERENTIATION	C5_GO	79	0.536497	2.13169	2.28514e-06	8.51657e-05	1946	tags=28%, list=9%, signal=25%	ROR2/TNF/LIF/ROR1/CLCF1/IL6/S100A9/LDLR/S100A8/EPHA4/SHH/SOX8/CNTF/C5AR1/FPR2/TSPAN2/HES1/ID2/EGFR/VIM/SOX9/S100B
GO_REGULATION_OF_GRANULOCYTE_CHEMOTAXIS	C5_GO	49	0.618032	2.22899	2.30983e-06	8.59819e-05	3074	tags=45%, list=14%, signal=39%	CXCL8/CCL5/THBS1/CSF1/IL23A/CCR7/XCL1/IL34/C5AR1/DYSF/C3AR1/CSF1R/EDN1/CCL19/AKIRIN1/SLIT2/C1QBP/IL4/DAPK2/RARRES2/CAMK1D/CXCL17
GO_LYMPHOCYTE_MEDIATED_IMMUNITY	C5_GO	341	0.347552	1.69107	2.32558e-06	8.64638e-05	4541	tags=28%, list=21%, signal=23%	TNF/CD96/PRF1/SH2D1A/HLA-G/ICAM1/CD70/BCL3/CLCF1/IL23A/IL6/NCR3/IGKC/LTA/IL12RB1/CD28/FOXJ1/XCL1/BCL6/HAVCR2/TBX21/CRTAM/ULBP2/GATA3/IGLV1-40/FCER1G/SUSD4/CORO1A/SLC22A13/ULBP1/TRBC2/NLRP3/CD27/CD1B/CD160/NECTIN2/TRDC/TNFRSF1B/FCER2/IGKV1-5/CD1A/MBL2/CLC/C1S/IL18RAP/MYO1G/IGHV2-26/TGFB1/CD1E/SMAD7/GZMB/IGLL1/PRKCD/HLA-B/IRF7/KIR2DL4/IGLV6-57/IGKV5-2/IL10/CD1C/CD8A/C1QBP/LILRB1/IL4/SH2D1B/C3/HLA-A…
GSE25123_WT_VS_PPARG_KO_MACROPHAGE_ROSIGLITAZONE_STIM_UP	C7_immunologic	196	-0.424124	-1.89244	2.39882e-06	8.90795e-05	3282	tags=30%, list=15%, signal=26%	TTC28/USP33/TMEM245/ZDHHC14/SNX13/USP51/KCNQ1/SLC18B1/NBL1/SKIDA1/ANKFY1/SLC35E2B/MAGEH1/PPM1K/PHYKPL/SLCO2B1/DNAJC13/TBC1D4/SELPLG/NMRK1/IKBKB/GPR155/HOXB7/SPATS2L/A2M/GLCE/MANEA/ABCG2/DAB2/MAP3K5/ZKSCAN4/OLFML2B/ST6GAL1/RPP25/GAS6/SCAMP5/ZNF585B/CTSF/STON2/PCDH12/MTUS1/ARHGEF12/FAM110B/CYBRD1/SLC22A23/SLC25A4/PLEKHA1/NRP1/TSPYL5/DST/CAPRIN2/PIK3R3/NFIA/SLC1A3/DISP1/TBC1D12/HECTD2/WDFY3/SPTLC3
GO_REPRODUCTIVE_SYSTEM_DEVELOPMENT	C5_GO	440	0.328507	1.6392	2.41185e-06	8.94248e-05	4066	tags=29%, list=19%, signal=24%	ROR2/ADM/PTX3/INHBA/WT1/LIF/FOXA1/PHLDA2/TCF7/SNAI1/RETN/STAR/ICAM1/FOXC1/SPP1/MDFI/LFNG/PLCD3/MMP19/NTRK1/GREB1L/LHX9/STRA6/CCND1/ANXA1/LEF1/JUNB/PTGS2/SHH/NR5A1/SOX8/CSF2/SOX15/ZFP42/GATA3/RDH10/VEGFA/SERPINF1/FOSL1/PRDM1/APELA/GHRL/RARA/BASP1/VGF/DHCR24/LHX8/LHX1/AXL/PDGFB/CTSV/UTF1/CEBPB/SRD5A2/DHH/SOCS3/PTPRN/HES1/ADCYAP1/DCN/TPPP3/PLK4/EGFR/TEX19/RSPO3/SPO11/HSD17B2/RARG/LHB/SOX9/ROBO2/WNT4…
GO_POSITIVE_REGULATION_OF_ADAPTIVE_IMMUNE_RESPONSE	C5_GO	105	0.490681	2.04186	2.41391e-06	8.94248e-05	2757	tags=30%, list=13%, signal=27%	TNF/HLA-G/CLCF1/IL23A/IL6/LTA/IL12RB1/CD28/XCL1/HLX/ANXA1/TBX21/TNFRSF13C/RIPK2/GATA3/FCER1G/NFKBID/SLC22A13/NLRP3/CD1B/NECTIN2/FCER2/CD1A/CCL19/TGFB1/CD1E/HLA-B/CD1C/IL4/C3/NLRP10/HLA-A
GSE24634_IL4_VS_CTRL_TREATED_NAIVE_CD4_TCELL_DAY10_DN	C7_immunologic	190	0.4169	1.89894	2.42886e-06	8.98706e-05	2688	tags=24%, list=12%, signal=21%	RRAD/CXCL8/INHBA/DUSP5/IL1RN/KYNU/F3/STX11/RAB20/MT2A/RAB31/TYROBP/PLAUR/TUBB6/CDKN1A/UPP1/STAT1/GBP1/STAP2/GBP2/CYBB/CCR1/HSPA6/DHRS3/NLRP3/LRP12/IGFBP6/SLC2A6/IRF1/CEBPB/IFIT3/MT1H/ST3GAL5/MT1G/CALCOCO2/TNFAIP6/GEM/CLIC4/SLC30A1/MNDA/ADAMDEC1/IRF7/SLC35B1/ALAS1/C3/CKAP4
GSE38681_WT_VS_LYL1_KO_LYMPHOID_PRIMED_MULTIPOTENT_PROGENITOR_DN	C7_immunologic	197	0.406854	1.86635	2.45491e-06	9.07259e-05	3470	tags=28%, list=16%, signal=24%	CXCL10/IL2RA/IL10RA/HLA-G/OASL/IRF4/GADD45G/SLFN12L/SOCS1/LGALS3BP/ISG15/MAP3K8/METRNL/STAT1/GPR65/GBP2/GCH1/PELI1/GBP7/BIRC3/IRF1/PLEKHO1/IFIT3/SOCS3/PIM2/RNF19B/TAP1/VMP1/GEM/IRGM/IFIT2/RGS1/CLIC4/GZMB/ROS1/IRF7/SAMHD1/ISG20/ZBP1/CMPK2/HSPA5/CD82/USP18/CMTM6/FAS/MAG/PTPRE/NABP1/HELZ2/MX1/NAMPT/ZNF281/JPH2/ARID5A/NFE2L2
PODAR_RESPONSE_TO_ADAPHOSTIN_UP	C2_curated	139	0.441747	1.90924	2.4703e-06	9.11854e-05	3072	tags=32%, list=14%, signal=28%	TNFSF9/DUSP5/PMAIP1/TRIB1/TUBB2A/IL23A/ATF3/MIR22HG/RGS2/CHAC1/IER5/DNAAF1/ANXA1/CLEC2B/KLF2/ITGAX/SAT1/VEGFA/HMOX1/KLF6/HSPA6/GADD45A/FNDC11/SOX4/CEBPB/ID2/MFAP4/NCF2/MAP1LC3B/SLC3A2/HEXIM1/DDIT4/MSX1/DDIT3/DNAJB4/MAFF/RND3/ZFP36L1/ZBTB43/ISG20/ATF4/HSPA1B/CDKN1C/CYTIP/DNAJB1
GO_REGULATION_OF_IMMUNE_EFFECTOR_PROCESS	C5_GO	446	0.325431	1.62505	2.4773e-06	9.13345e-05	3134	tags=22%, list=14%, signal=19%	TNF/TNFRSF4/CD96/IL2RA/SH2D1A/HLA-G/ICAM1/CLCF1/IL23A/IRF4/IL6/NCR3/IGKC/LTA/IL12RB1/CD177/CD28/ZC3H12A/FOXJ1/XCL1/NR4A3/BCL6/HLX/TYROBP/DUSP10/TNFAIP3/HAVCR2/ANXA1/TBX21/CRTAM/STAT1/SEMA7A/RIPK2/FGR/GATA3/IGLV1-40/FCER1G/C5AR1/SUSD4/HMOX1/ZNF683/RARA/C3AR1/NFKBID/SLC22A13/SLC7A5/BIRC3/APOA1/NLRP3/CD1B/CD160/NECTIN2/TNFRSF1B/FCER2/TLR9/IGKV1-5/PGLYRP1/FCRL3/ITGB2/CD1A/SPINK5/CLC/CFHR1/FFAR2/C1S/I…
GO_REGULATION_OF_METAL_ION_TRANSPORT	C5_GO	376	0.336231	1.65343	2.48846e-06	9.16364e-05	3598	tags=27%, list=17%, signal=23%	CCL3/RRAD/CCL5/CXCL10/CCL4/JPH1/ICAM1/TESC/LILRA5/P2RX5/HSPA2/CCL2/PTPN3/JPH4/XCL1/KCNH2/GPER1/HAP1/RNF207/WNK4/PTGS2/CXCL11/RCVRN/GALR2/GAL/FXYD2/SNTA1/KCNJ2/EDN3/KCNN2/SCN4B/F2RL3/CCR1/CAMK2A/FXYD6/DYSF/CXCL9/CORO1A/ANK2/SCN3B/CD33/ACTN2/NTSR1/FGF14/KCNS2/PDGFB/CEMIP/JPH3/RGS9/AHNAK/ADCYAP1/HOMER1/TLR9/SCN5A/FCRL3/GEM/CBARP/GCK/SLC31A2/PDE4D/KCNA1/TMC1/GCG/PCSK9/SLC30A1/KCNRG/LGALS3/ATP2B1/PDE4…
GEISS_RESPONSE_TO_DSRNA_UP	C2_curated	39	0.654411	2.25846	2.52935e-06	9.30313e-05	1642	tags=44%, list=8%, signal=40%	CCL4/TFPI2/CCL2/ATF3/NFKBIA/PLAUR/TNFAIP3/ANXA1/GBP1/SAT1/GCH1/TNFAIP2/IGFBP6/IRF1/TRAF1/TNFAIP6/TAP1
GSE1432_CTRL_VS_IFNG_6H_MICROGLIA_UP	C7_immunologic	191	-0.425055	-1.89253	2.57747e-06	9.46883e-05	6093	tags=43%, list=28%, signal=32%	STAT5B/CBY1/GABRE/FBXO21/ACVR2B/RNF220/LIMS1/PHTF1/COQ8A/FYCO1/PASK/TRMT61B/POLR2H/ASB13/PIK3R4/SPSB3/MRS2/STK11/CCDC93/WDR37/SLC5A3/PAGR1/ASB1/NDUFA8/NCKIPSD/CDK5/PCNT/ATP6V0A1/FAM160B2/PARL/FAM216A/GMCL1/PLA2G12A/MSH2/PTPN22/DYNC2LI1/C2CD3/FRMPD1/SEL1L/USP46/FAM193B/TBC1D16/KANK2/VPS72/NINJ2/PCMTD2/SHQ1/MDM1/EZH1/ADAMTS3/MAST3/NFS1/CNNM3/DIP2C/LRRC8D/STRADA/HLTF/ZNF74/LRIG1/SLC25A42/SYNRG/ABCC5…
GO_ALPHA_BETA_T_CELL_DIFFERENTIATION	C5_GO	105	0.48972	2.03786	2.59272e-06	9.51351e-05	2618	tags=33%, list=12%, signal=29%	TCF7/BCL3/CD83/GPR183/IL23A/RELB/IRF4/IL6/IL12RB1/ZC3H12A/SOCS1/ZAP70/BCL6/HLX/ANXA1/TBX21/LEF1/SHH/RIPK2/GATA3/PRDM1/ZNF683/RARA/NFKBID/NLRP3/RUNX3/IRF1/PTGER4/CCL19/TNFSF8/SMAD7/TOX/PRR7/IL4/ITK
GSE43863_TFH_VS_LY6C_LOW_CXCR5NEG_EFFECTOR_CD4_TCELL_DN	C7_immunologic	195	0.4103	1.87916	2.60039e-06	9.53032e-05	2098	tags=26%, list=10%, signal=23%	CD96/GNG4/HIC1/TMEM51/SLC15A3/SPP1/TRIB1/RAB20/CREB5/WNT1/RASD1/DUSP4/CTXN1/EGR2/SLC6A19/S1PR3/XCL1/MIR22HG/NR4A3/RGS2/LCK/SH2D2A/TNFRSF13C/TMEM74B/PRDM8/HPGDS/TOX2/PRKCA/FOSL1/WNT10A/EGR3/SCN1A/IER2/MAP2K3/CD33/ELMSAN1/CD27/CST7/SOX4/PTPRN/GNAT1/AHR/SFTPB/IFITM2/NRP2/NAB2/TGFB1/GRHL1/TIPARP/FOSL2
HALLMARK_APOPTOSIS	Hallmark	160	0.428994	1.91053	2.62586e-06	9.61228e-05	2379	tags=26%, list=11%, signal=23%	TNF/PRF1/GSTM1/CCNA1/FEZ1/TNFRSF12A/PMAIP1/IER3/IL6/ATF3/CD69/NEDD9/GADD45B/TIMP1/CCND1/ERBB3/ANXA1/LEF1/CDKN1A/LMNA/SAT1/BMF/GCH1/EGR3/RHOB/HMOX1/RARA/GNA15/BIRC3/IGFBP6/GADD45A/IRF1/DCN/TAP1/DDIT3/BTG2/TIMP3/SMAD7/LGALS3/ISG20/BCL2L11
GSE360_L_MAJOR_VS_B_MALAYI_LOW_DOSE_DC_UP	C7_immunologic	197	0.406339	1.86399	2.63675e-06	9.64071e-05	2233	tags=20%, list=10%, signal=18%	CCL3/TPPP/MSC/STX1A/INHBA/PDE1A/ICAM1/IER3/MMP9/IL6/GPD1/PAX8/GADD45G/CD28/ARL4C/CCR7/NINJ1/SLC2A3/SLC6A8/TNFAIP3/SAT1/GBP2/TRPM1/SLAMF1/MARCKSL1/BASP1/GUCY2F/TNFRSF1B/CFD/SYN1/TAP1/PLK4/HMGCS2/NFKB1/CALML3/PIM1/UBE2S/HSPE1/HHLA1/SLC22A4
GSE9006_HEALTHY_VS_TYPE_1_DIABETES_PBMC_AT_DX_DN	C7_immunologic	193	0.40467	1.8447	2.69602e-06	9.84573e-05	1999	tags=23%, list=9%, signal=21%	CXCL8/CXCL1/HCAR3/G0S2/TREM1/TRIB1/IRF4/IGKC/SGK1/AQP9/CXCL2/CCL2/CCR7/EGR2/S100A8/BHLHE41/RGS2/HLX/SERPINB2/S100P/PTGS2/MAFB/FOSL1/CCR1/EGR3/S1PR1/ABCA1/IER2/CORO1A/BASP1/FPR2/C3AR1/TNFRSF10C/LAMB4/ZFP36/THBD/ELL2/ADGRE3/RGCC/SOCS3/TNFAIP6/FFAR2/PARM1/BTG2/PIM1
MIR106A_5P	C3_motif	627	-0.311525	-1.56306	2.73538e-06	9.97767e-05	3993	tags=27%, list=18%, signal=23%	OCRL/MAP7/ANO6/TAOK3/GAB1/UBE3C/REV3L/NTN4/ZNF264/MAP10/NKIRAS1/CC2D1A/PXYLP1/SMOC1/EFCAB14/USP46/FGD5/PKD2/PLAG1/ZFAND4/RAB10/SLC33A1/TANC1/CLOCK/RPS6KA6/PRR14L/USP28/CRYBG3/KIF26B/ZNF652/CENPQ/PRDM6/BEST3/RBL2/CLIP4/BRWD1/TIAM1/TAOK1/NAGK/FAM102A/SORL1/REEP3/E2F5/ZFPM2/SLC4A8/EZH1/GOLGA1/CNOT6/CREB1/ATL3/RBM12B/SLC46A3/ANKFY1/ATG2B/MEX3D/UNKL/ITGB8/SESN3/TMX3/LIMA1/ZNF202/NHLRC3/SH3PXD2A/ADARB1…
GSE7509_DC_VS_MONOCYTE_DN	C7_immunologic	197	0.405854	1.86177	2.74586e-06	0.000100041	3840	tags=29%, list=18%, signal=24%	TNF/CXCL3/INHBA/CXCL10/HTRA3/NEUROG3/AQP9/TSKU/S100A8/LGALS3BP/HCK/NFKBIA/STAT1/KLF2/FGR/GBP2/CYBB/RHOB/FPR1/GHRL/IER2/LY6E/OR2H1/FPR2/EZR/ETS2/IFIT3/RGCC/ANXA2/TNFRSF1B/FCGR1A/TRAF1/TAP1/HP/PCDHA11/IRGM/RARG/CLIC4/ATF4/ACOD1/CMPK2/C3/ALDOA/USP18/RHOA/ENO1/TXN/SLC7A7/MAIP1/KCNJ3/TPM3/PRELID1/PLAA/SPI1/AUP1/PDIA3/RANBP1
SRF_Q6	C3_motif	244	0.373562	1.75614	2.7588e-06	0.000100394	3841	tags=32%, list=18%, signal=26%	DUSP5/THBS1/NFATC4/DUSP2/COL1A2/CD248/HOXA1/GADD45G/EGR2/CKM/RASD2/DUSP10/PCDH7/ACTG2/JUNB/CNTF/FOSL1/EGR3/PRDM1/KLF6/PDLIM4/LDB3/SCN3B/PODN/ACTC1/EFHD1/BDNF/LSP1/MYADM/RAI2/SRD5A2/ACTA1/CABP1/DHH/PRM1/MATR3/NR4A1/IGF1/TMEM47/CFL2/ACKR1/KCNA1/ADGRG4/MSX1/AQP2/FAM53C/IGF2-AS/INSM1/CFL1/AKIRIN2/SP7/ACTB/MAPKAPK2/ATF4/NKX2-1/PRELP/CNN2/GPR158/WNT5A/PFN1/PDLIM3/ZNF408/SIX2/TPM3/SRF/JPH2/ADAMTS12/RIMS…
GO_NEGATIVE_REGULATION_OF_LYMPHOCYTE_ACTIVATION	C5_GO	147	0.443283	1.9382	2.78403e-06	0.000101193	2573	tags=29%, list=12%, signal=25%	INHBA/IL2RA/HLA-G/LAX1/SDC4/ZC3H12A/FOXJ1/XCL1/SOCS1/LRRC32/BCL6/HLX/TYROBP/TNFAIP3/HAVCR2/ANXA1/TBX21/CRTAM/SHH/FGR/GAL/PELI1/NFKBID/NRARP/AXL/PLA2G2F/RUNX3/IRF1/CEBPB/LST1/TIGIT/ID2/PGLYRP1/VTCN1/PAG1/SMAD7/MNDA/LGALS3/TNFRSF13B/IL10/LILRB1/IL4
GSE18791_CTRL_VS_NEWCASTLE_VIRUS_DC_8H_DN	C7_immunologic	186	0.409398	1.86417	2.8186e-06	0.000102328	2560	tags=24%, list=12%, signal=22%	TNF/CXCL10/DUSP5/BCL6B/PMAIP1/OASL/BCL3/PHOX2B/HPCAL4/MT2A/NINJ1/LGALS3BP/GADD45B/ISG15/PTGS2/CXCL11/GBP5/GBP1/GCH1/ETV7/CXCL9/GRIP2/CSRNP1/MAK/IRF1/IFIT3/IFI6/CDH11/TAP1/SERPINA4/ARL5B/IFIT2/EPSTI1/DDIT4/SLC31A2/DDIT3/GRHL1/TMEM217/ZBTB43/IRF7/NEXN/ISG20/ZBP1/CMPK2/MASTL
MODULE_1	C4_computational	358	0.35008	1.71284	2.83568e-06	0.000102827	2112	tags=23%, list=10%, signal=21%	ROR2/CCL3/RRAD/GSTM1/EPS8/DUSP2/G0S2/STAR/IER3/COL6A2/COL1A2/IL6/SGK1/CCL2/GFPT2/CNN3/ATF3/SERPINE1/GADD45G/LDLR/PEG10/DLK1/SLC2A3/RGS2/RAB31/COL6A1/BCL6/CCND1/TNFAIP3/FILIP1L/ANXA1/ACTG2/APOE/JUNB/CDKN1A/CLEC2B/CRYAB/DPYSL3/LMNA/VEGFA/TRIB2/EGR3/RHOB/SPON1/EMP3/MXRA5/CDC42EP1/IRS1/LTBP1/ITGB5/NCALD/SGCE/DHRS3/IGFBP6/GADD45A/SOX4/NECTIN2/IQGAP1/CFD/HES1/PLA2G2A/NR4A1/CDH11/MFAP4/FGFR1/IGF1/ITM2A/…
GSE18791_CTRL_VS_NEWCASTLE_VIRUS_DC_10H_DN	C7_immunologic	186	0.409041	1.86254	2.85496e-06	0.000103284	2841	tags=25%, list=13%, signal=22%	TNF/IRF8/NIPAL4/DUSP5/PMAIP1/OASL/STX11/IL6/ISG15/FAM107B/MAP3K8/TNFAIP3/PTGS2/GBP5/SESN2/RIPK2/GCH1/ETV7/CXCL9/BCL2L14/CSRNP1/CDC42EP3/IRF1/IFIT3/SCNN1G/ABTB2/TRAF1/TAP1/ARL5B/IFIT2/IL15RA/EPSTI1/PAG1/SLC31A2/TMCC3/IFNA10/PDE4B/NEXN/ZBP1/CSRP2/CMPK2/MASTL/TLR2/GTF2B/USP18/FAS/ADAMTSL5
GSE34156_NOD2_LIGAND_VS_TLR1_TLR2_LIGAND_6H_TREATED_MONOCYTE_DN	C7_immunologic	189	0.412768	1.87573	2.85497e-06	0.000103284	2253	tags=26%, list=10%, signal=23%	CXCL8/CXCL1/CXCL3/HCAR3/MARCKS/TMEM51/KYNU/PLAU/HCK/RAB31/TIMP1/TYROBP/HAVCR2/TMEM158/MAFB/KCNJ2/SAT1/VEGFA/CYBB/FCGR2A/CCR1/IFI30/FCAR/ABCA1/SLC43A2/FPR2/C3AR1/SLC16A6/MSR1/NDST3/LILRB3/LILRA6/ADGRE3/LINC01016/MPEG1/PLA2G2A/NCF2/C15orf48/CLIC1/NRP2/SIGLEC9/LILRB4/TMCC3/CLIC4/LGALS3/P2RY14/ACTB/ELF4/GPR101
GSE37416_0H_VS_3H_F_TULARENSIS_LVS_NEUTROPHIL_DN	C7_immunologic	196	0.405091	1.85542	2.86104e-06	0.000103383	4738	tags=29%, list=22%, signal=23%	TNF/ADM/DUSP5/DUSP2/IL10RA/STX11/CD83/KCNH2/IER5/NFKBIA/MAP3K8/PLAUR/NFKBIE/CDKN1A/GPR65/EMP3/MAP2K3/NFKBID/GNA15/ELL2/SLC35B2/B3GNT5/TNFAIP6/HMGA1/TMEM88/TPI1/PDE4D/SIPA1L1/RGS1/TIPARP/MAFF/PDE4B/MAPKAPK2/GGT1/MAPK6/FAM209B/ENO1/EAF1/SNPH/NABP1/P4HB/NFE2L2/CXCL16/SPTY2D1/FKBP2/SLC43A3/ZNF267/SPHK1/TFRC/STRAP/RAB8B/CTNNAL1/BZW1/PHF19/CHMP2B/TAF13/SNIP1
LFA1_Q6	C3_motif	244	0.373214	1.7545	2.86699e-06	0.000103476	4227	tags=31%, list=19%, signal=25%	ADM/CAMKV/GPR3/TCF7/SEMA6A/JPH4/RAB31/BCL6/NPAS3/NFKBIA/S100A5/SLC7A10/CNTNAP5/SLC26A9/ASIC2/S1PR1/SH3BP1/CEND1/CACNA1G/NGF/ZFP36/BNC2/CEBPB/RHOG/LMOD3/YPEL4/DHH/MYPN/HES1/NR4A1/ARL4D/HOXC6/TUBA4B/DUOXA2/TMEM88/ROM1/CCDC148/MGAT4C/TBR1/MSX1/WNT4/TUBA4A/SP7/ELF4/TMEM132E/CLIC5/IQCD/VASP/NKX2-1/CNN2/PDRG1/SIX4/PDZD9/INCA1/OTOP2/NR5A2/VSX2/PNOC/RFX4/RASL12/CYB5D1/CAV1/ETV1/DUOX2/FKBP2/ZNF385A/ZNF513…
GSE28783_CTRL_ANTI_MIR_VS_UNTREATED_ATHEROSCLEROSIS_MACROPHAGE_DN	C7_immunologic	193	0.404065	1.84194	2.87942e-06	0.000103804	2158	tags=24%, list=10%, signal=22%	TNF/CCL3/GNG4/DUSP2/DPF1/F3/CXCL2/SERPINE1/PLP2/CD6/NINJ1/GADD45B/ISG15/NPAS3/CDKN1A/PLIN2/CXCL11/CD5/SPRY2/ALAS2/OLIG2/ADGRE5/EXTL1/GP9/RELN/BMP3/CACNA1G/NTSR1/GABRP/RUNX3/PTP4A1/TNFRSF1B/HES1/NR4A1/NTS/PTPRT/PFKFB3/DSCAM/TMEM47/HMGA1/DDIT4/RGS10/PCSK1/TGFB1/FOSL2/TUBA4A
NUYTTEN_EZH2_TARGETS_DN	C2_curated	985	-0.286177	-1.48863	2.90672e-06	0.000104666	4710	tags=26%, list=22%, signal=22%	ANKRD36B/RBM47/RACGAP1/DIDO1/TRIM13/CDK5/EXOSC2/NRXN3/TBXAS1/SEMA5A/DEPDC1/SRBD1/FANCA/EID2B/ZDHHC17/CD46/USP37/PDSS2/MYO19/UGGT2/SMIM8/PDCD2L/WDR54/UBE2T/GTPBP3/TIGD2/CMTM4/TDRKH/UMPS/FCHO1/MANSC1/CDAN1/YIPF4/AUH/WDHD1/ITGB3BP/DHX33/SOX7/CERK/TBL1XR1/NR1H3/TICRR/CACNB2/HMGN5/ARHGEF39/KNTC1/GNPAT/NBR1/FGFR1OP/HOOK1/SAYSD1/RAD54L/MAP7/RNF182/CCM2/ZNF839/SPG7/ARHGEF16/SLC45A3/CNOT1/TESMIN/CENPI/KIF…
LET_7A_3P	C3_motif	707	-0.307865	-1.55591	2.91475e-06	0.000104832	4862	tags=32%, list=22%, signal=25%	KDM6A/DMTF1/PNISR/UTRN/ELK4/TASP1/PHC3/DACH1/ZNF506/ZBTB14/DCAF6/LGALSL/PRR12/SMARCA2/KRBOX4/ULK1/FNDC3A/MYCBP2/USP24/USP34/SRBD1/BRWD3/CUL1/DAAM1/ARHGAP20/UBR1/PTMS/ZNF569/CPEB3/SEMA3C/TSHZ3/JAG2/DCAF7/RIMKLB/PHIP/NPY/TGFB3/PRPF38B/PAXBP1/IKZF2/ACTL6A/PAN3/HERC2/EIF4A2/TRPM7/GDAP2/SCAMP1/RNF24/AFF3/COG7/MEX3B/CREBZF/ARID1B/DYNC2LI1/PLCL2/HEATR5B/UBE3C/PIK3C2A/ALKBH8/REV3L/JAK2/PPP4R3B/EIF4G3/KIA…
AP1_Q6	C3_motif	256	0.377659	1.78252	2.93294e-06	0.000105364	3637	tags=28%, list=17%, signal=23%	GPR3/NRIP3/NFATC4/PHLDA2/IL1RN/TRIB1/MMP9/FLNC/IL23A/MDFI/TSKU/CPA6/KBTBD8/PKP3/S100A5/CDKN1A/AK5/LMNA/PTPRH/EEF1A2/PAK6/SFN/PRDM1/RELL2/CCDC50/C3AR1/VGF/SLC16A6/DHRS3/GADD45A/PTP4A1/AXIN2/PTPRN/DCN/CYTOR/TUBA4B/ABI3/TEX19/SLC4A11/ROM1/FHL3/VIM/SCEL/KCNA2/SHC3/RTN4/CNTD1/TAGLN2/GFAP/TUBA4A/ETV5/GNAI1/UCN2/PRR7/VASP/GTF2B/ALDOA/GAPDH/ENO1/PSMD7/TLL1/RCAN2/PDZD9/FGF12/ADORA2A/RIT1/UCHL3/RIMS1/SFTPC…
GO_T_CELL_MIGRATION	C5_GO	66	0.552839	2.11793	2.948e-06	0.000105782	3543	tags=32%, list=16%, signal=27%	CCL3/CCL5/CXCL10/CXCR3/ICAM1/ITGB7/GPR183/CCL2/XCL1/ZAP70/CXCL11/S1PR1/CD99/XG/MYO1G/ADAM8/RHOA/WNT5A/CXCL13/AIF1/CXCL16
DORN_ADENOVIRUS_INFECTION_12HR_DN	C2_curated	30	0.692309	2.23359	2.95513e-06	0.000105915	929	tags=40%, list=4%, signal=38%	TNFRSF12A/KYNU/IER3/CD83/IL6/SH3BP5/SGK1/TRAF4/CCND1/NFKBIA/MAP2K3/COL7A1
MIR17_5P	C3_motif	610	-0.317791	-1.58915	2.9624e-06	0.000105961	3993	tags=29%, list=18%, signal=24%	KMT5B/WFS1/ST3GAL1/GNS/ANKRD50/SRGAP1/RASGRF2/EIF4A2/FSD1L/OCRL/MAP7/ANO6/TAOK3/GAB1/UBE3C/REV3L/NTN4/ZNF264/MAP10/NKIRAS1/CC2D1A/PXYLP1/SMOC1/EFCAB14/USP46/FGD5/PKD2/PLAG1/ZFAND4/RAB10/SLC33A1/TANC1/CLOCK/RPS6KA6/PRR14L/USP28/CRYBG3/KIF26B/ZNF652/CENPQ/PRDM6/BEST3/RBL2/CLIP4/BRWD1/TIAM1/TAOK1/NAGK/FAM102A/REEP3/E2F5/ZFPM2/SLC4A8/EZH1/GOLGA1/CNOT6/CREB1/ATL3/RBM12B/SLC46A3/ANKFY1/ATG2B/MEX3D/UNKL…
GO_NEGATIVE_REGULATION_OF_RESPONSE_TO_EXTERNAL_STIMULUS	C5_GO	366	0.342759	1.68267	2.9633e-06	0.000105961	3121	tags=25%, list=14%, signal=22%	TNF/CD96/THBS1/PDGFA/IL2RA/HLA-G/SPP1/TRIB1/PLAU/CCL2/SERPINE1/LDLR/ZC3H12A/SEMA6A/GPER1/F12/SERPINB2/EPHA4/DUSP10/PLAUR/TNFAIP3/HAVCR2/CNR2/GPR31/METRNL/APOE/SEMA7A/GATA3/SERPINF1/SUSD4/GHRL/FPR2/ADTRP/MMP26/F11/KRT1/APOA1/NLRP3/THBD/PDGFB/NT5E/CST7/EDN1/SH2B3/SOCS3/ANXA2/TNFRSF1B/ADCYAP1/PTGER4/FFAR4/IGF1/TNFAIP6/PGLYRP1/SPINK5/NFKB1/DDT/STAP1/CPB2/CCK/ROBO2/WNT4/SLIT2/CTNNA2/SEMA4G/PRKCD/HLA-B…
PARK_APL_PATHOGENESIS_DN	C2_curated	47	0.615597	2.19153	2.99771e-06	0.000106993	5518	tags=66%, list=25%, signal=49%	CXCL8/RAB31/SERPINB2/PRTN3/NFKBIE/JUNB/S100P/GAL/PRKCA/CYBB/IFI30/CORO1A/NEU1/SLC29A1/LSP1/ZYX/MNDA/CKAP4/LYZ/SRF/CEBPA/SPI1/QSOX1/BTG1/GPNMB/GLUL/GPI/SMOX/SRGN/VAT1/CTSD
GO_INTERLEUKIN_2_PRODUCTION	C5_GO	53	0.5821	2.13875	3.00022e-06	0.000106993	1128	tags=28%, list=5%, signal=27%	CD83/IRF4/CD28/XCL1/CLEC7A/TNFAIP3/HAVCR2/ANXA1/TBX21/RIPK2/GATA3/GBP1/FCER1G/EZR/ZFP36
HIRSCH_CELLULAR_TRANSFORMATION_SIGNATURE_UP	C2_curated	238	0.376185	1.76755	3.00304e-06	0.000106993	2490	tags=21%, list=11%, signal=19%	PTX3/CXCL3/PHLDA1/PMAIP1/BCL3/SERPINA1/IL1RAP/PLAU/IL6/TRAF4/BCL2A1/IFITM1/SLC2A3/RGS2/TIMP1/PLAUR/JUNB/UPP1/CLEC2B/CYB5R2/KLF2/RIPK2/SAT1/VEGFA/EEF1A2/GCH1/FOSL1/ADGRE5/PELI1/CD68/S1PR1/ABCA1/IER2/PARP8/NT5E/ETS2/SOCS3/RNF19B/TAP1/IL15RA/C1S/RND3/IRF7/PDE4B/ISG20/LY96/CSF3/ALAS1/TMEFF1/EIF1B
[truncated: 4,455 more rows]
