# Supplementary figures and images for: Inflammatory response in hematopoietic stem and progenitor cells triggered by activating SHP2 mutations evokes blood defects
Source: eLife journal article supplement (doi:10.7554/elife.73040), 2022-04-20

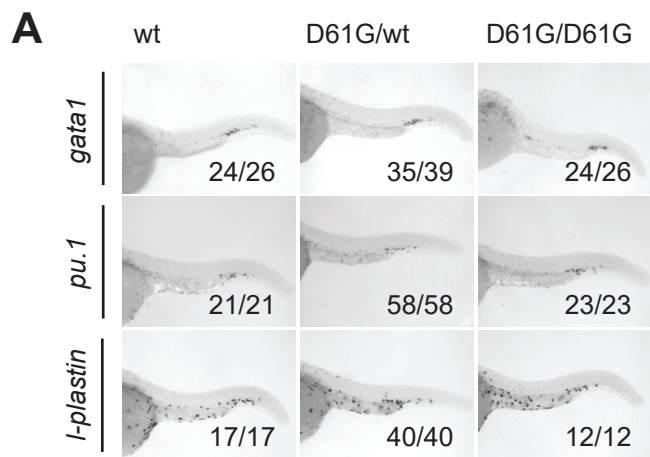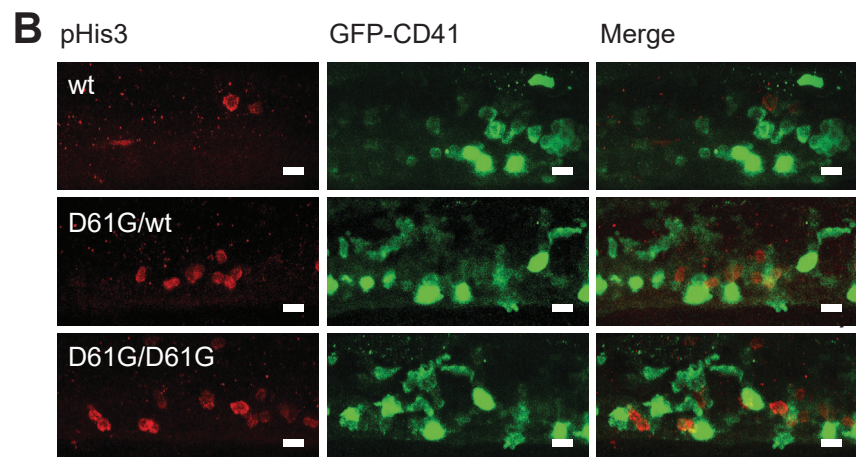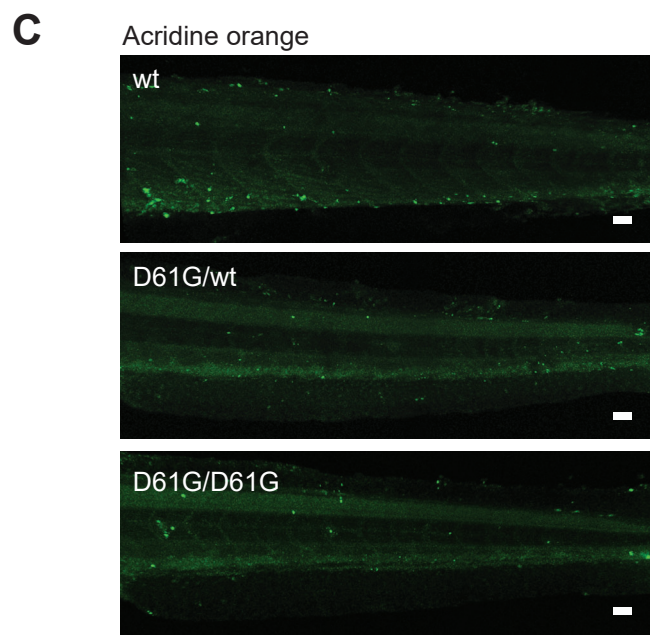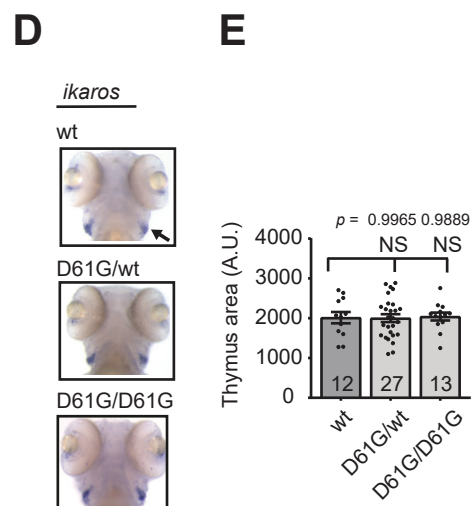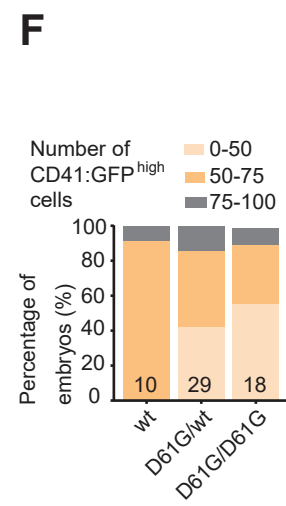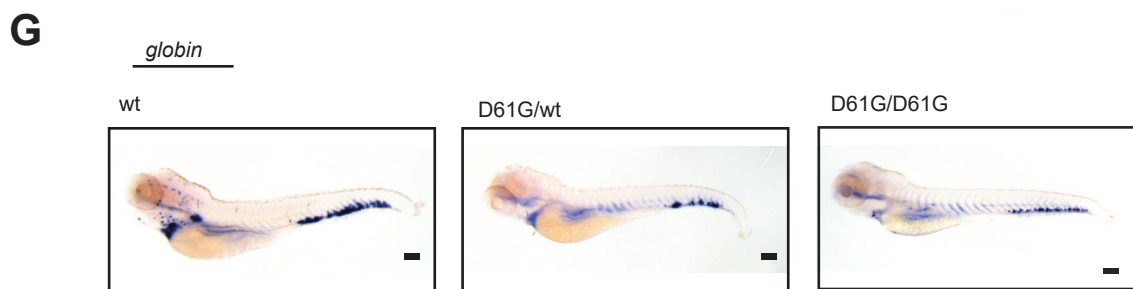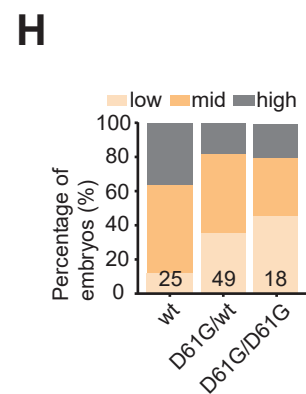

Supplement: supp [file elife-73040-supp-v1.zip › elife_poa_e73040_Figure_2_figure_supplement_1.pdf]

**A**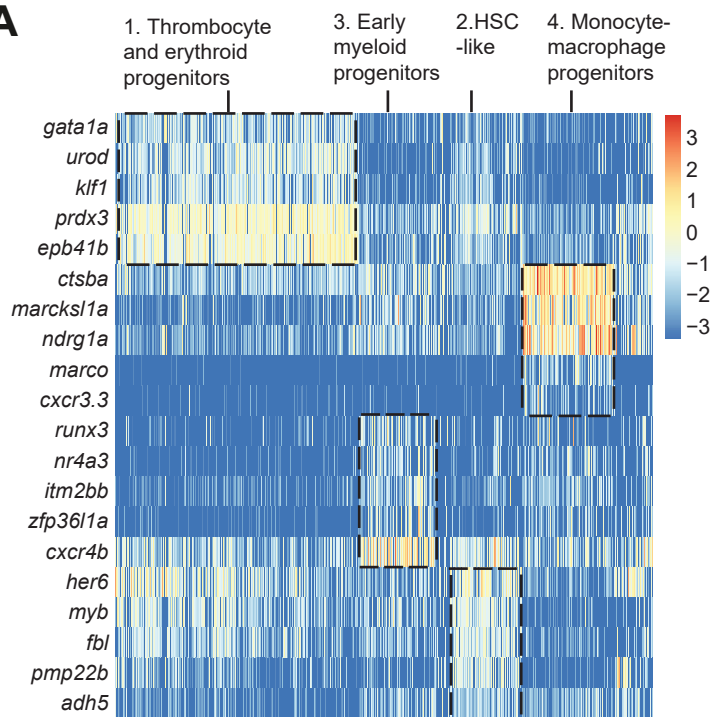**B**

Neutrophil progenitors subset

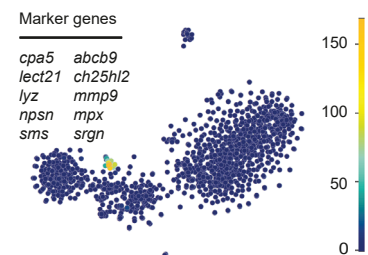

Supplement: supp [file elife-73040-supp-v1.zip › elife_poa_e73040_Figure_3_figure_supplement_1.pdf]

A

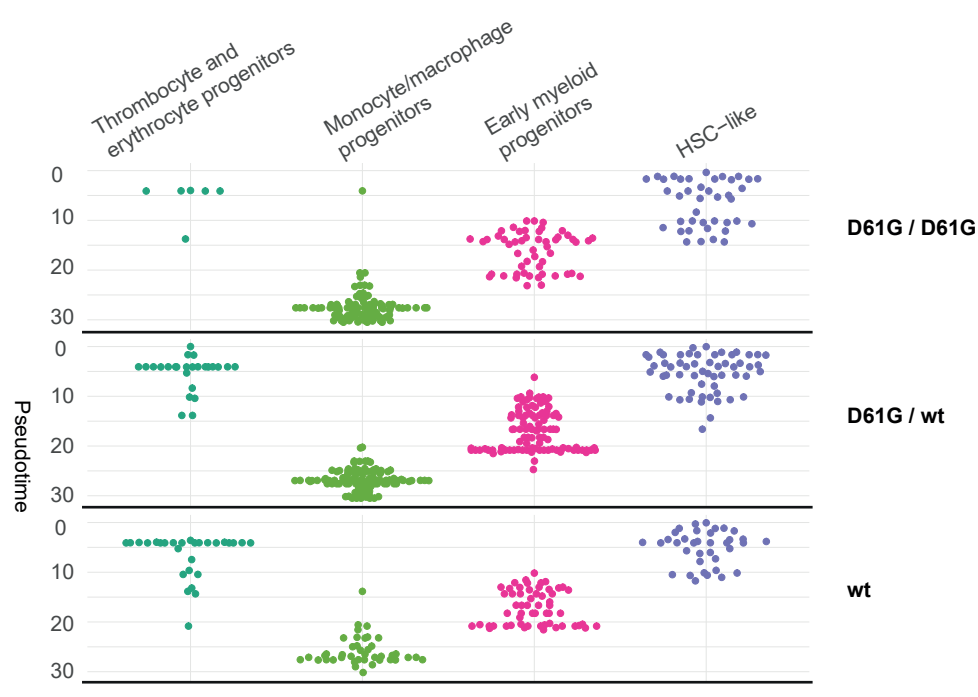

B

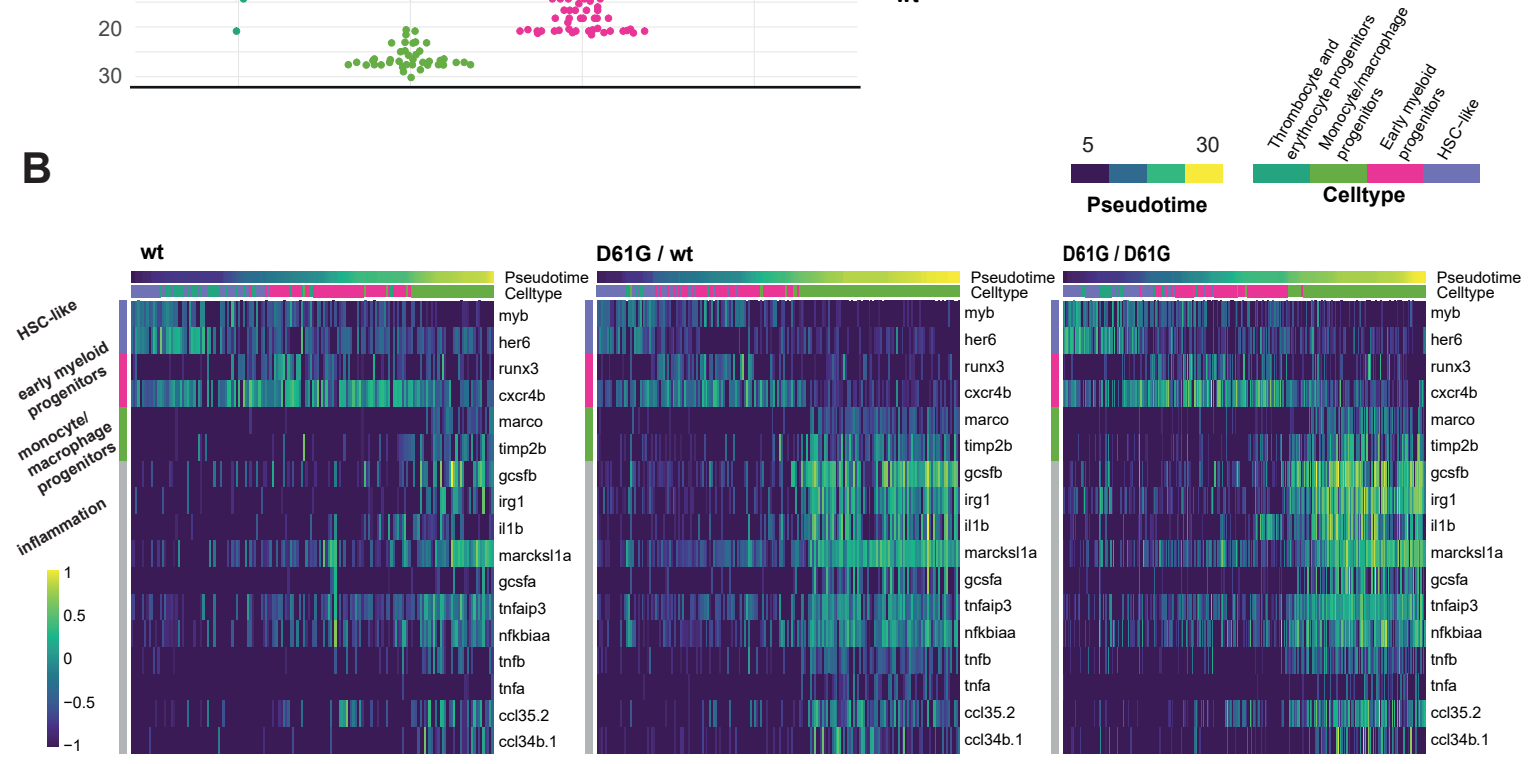

Supplement: supp [file elife-73040-supp-v1.zip › elife_poa_e73040_Figure_4_figure_supplement_1.pdf]
